# Supplementary material for: Transcriptome Analysis of Early Senescence in the Post-Anthesis Flag Leaf of Wheat (Triticum aestivum L.)
Source: Plants (Basel). 2022 Oct 1;11(19):2593. doi: 10.3390/plants11192593 (PMC9572001; doi:10.3390/plants11192593)
Supplement: Supplementary file 1 [file plants-11-02593-s001.zip]

Archive with 8 entries (8 files):
- Attached figure.pdf
- Table S1. qRT-PCR primer .xlsx
- Table S2. Photosynthesis-related SAGs.xls
- Table S3. DEGs were identified as putative SAGs.xls
- Table S4. Transporter-related SAGs.xls
- Table S5. Transcription factor-related SAGs.xls
- Table S6. Phytohormone-related SAGs.xls
- Table S7. Chlorophyll-related SAGs.xls
