# Supplementary material for: Transcriptome Analysis of Early Senescence in the Post-Anthesis Flag Leaf of Wheat (Triticum aestivum L.)
Source: Plants (Basel). 2022 Oct 1;11(19):2593. doi: 10.3390/plants11192593 (PMC9572001; doi:10.3390/plants11192593)
Supplement: Supplementary file 1 [file plants-11-02593-s001.zip › Table S1. qRT-PCR primer .xlsx]

## Sheet: Sheet1
ID	Fw sequence	Rev sequence
Traes_2AS_9DE16F020	ACGTCCTTTCTGGGACTGACCAAC	TTGTACCCATTTGGCGCTTCGG
Traes_5DL_A86D8E03D	AGCTTGCTTGGTCCAATGGC	CTCGTCATCCACAGGACAATAAGG
Traes_2BL_AA9337DF3	CATCGGTACCATGCTTCTCAGC	CCGCATACCATCCTCACTATCCTC
Traes_7DS_F5A240B02	AAGGTGTACGAGATGCAGGACGAG	AGAACACCCTGAAACACCTCTGC
Traes_2BL_98439EA10	ACTCCATGAACCACAGCGTATCC	TCTTGCGCTTCTCCCTGTAACG
Traes_2AL_8A23618BA	ACCTGACATCGTCCCTACACTG	GAAGTGCTTTGCCATTCAGCTC
Traes_1BS_EF67E5A24	TCTCCTTTCACGCAGTGAAGCC	GTTGTTGCTGCTGATGTTCCTTG
Traes_1AS_F3EAEC435	TCTGGCTTCTCCTTTCACGCAGTC	TGTTGTTGCTCCTGCTGCTCCTTG
Traes_5BL_62D9B877B	TCATACCATCTGAACGCCCAAAC	AGCAATGCAAGCATTCCAACCG
Traes_2DS_AE6E354A9	TGGCTGGACTTTGTTACCTACCTG	AGGTAGCTCCATGCCTTTCCAC
Traes_6DL_0FF72D765	ACCCACAAGGCCGACATCAAGAAG	GATCTTGCCGCCCTCGATCTTATC
Traes_2DL_30F23E577	CAAGACATGCTTCTGAACTTCGC	TTGCGACGTTCTATGATGGGTAAG
TaActin	AGGTGCCCTGAGGTGCTGTT	GCCAAAATAGAGCCACCGAT
