# Supplementary material for: Transcriptome Analysis of Early Senescence in the Post-Anthesis Flag Leaf of Wheat (Triticum aestivum L.)
Source: Plants (Basel). 2022 Oct 1;11(19):2593. doi: 10.3390/plants11192593 (PMC9572001; doi:10.3390/plants11192593)
Supplement: Supplementary file 1 [file plants-11-02593-s001.zip › Table S2. Photosynthesis-related SAGs.xls]

## Sheet: Sheet1
Gene id	Log2(Fold change)				Annotation	Homologue	E value
	0DAA	15DAA	25DAA	30DAA
Traes_4AS_71B1DAAE4	-0.268242	-0.39829	-0.605346	-1.55266	ATP synthase subunit b'	XP_003570459.1	5e-53
Traes_4BL_7CFBDAD7B	-0.331432	-0.227268	-2.81995	-4.49007	ATP synthase subunit b'	XP_006651255.1	3e-43
Traes_4DL_8507B1800	-0.385755	-0.562739	-1.57045	-3.22846	ATP synthase subunit b'	XP_003570459.1	9e-55
Novel03527	-0.25851	-0.639693	-1.13805	-2.4947	Cytochrome b6-f complex iron-sulfur subunit	Q7X9A6.1	2e-141
Traes_7BL_0B5D2BAF0	-0.664169	-0.351838	-1.7433	-3.8295	Ferredoxin	EMT21184.1	3e-28
Traes_7DL_2DE9D2B041	-0.537885	-0.534666	-3.2043	-5.9885	Ferredoxin	EMT21184.1	2e-70
Traes_4AL_B9FA07247	-0.403103	-0.605816	-1.69385	-3.25903	Ferredoxin--NADP reductase	EMT15804.1	0
Traes_7AS_7BF04E4E6	-0.489183	-0.483277	-1.44113	-2.94063	Ferredoxin--NADP reductase	EMT15804.1	0
Traes_7DS_01A0AF589	-0.268817	-0.56835	-1.11876	-2.35647	Ferredoxin--NADP reductase	EMT15804.1	2e-33
Traes_2AL_264BF03F4	-0.348034	-0.538408	-1.5664	-3.01497	Oxygen-evolving enhancer protein 1	EMS63035.1	0
Traes_2BL_4B8B77E73	-0.304412	-0.17928	-1.05269	-2.48897	Oxygen-evolving enhancer protein 1	EMS63035.1	0
Traes_2DL_01BBE1DA1	-0.516277	0.099168	-1.96484	-3.7439	Oxygen-evolving enhancer protein 1	EMS63035.1	2e-11
Traes_2AL_0A039E562	-0.222733	-0.141515	-0.808296	-2.00154	Oxygen-evolving enhancer protein 2	Q00434.1	2e-148
Traes_2BL_476B6147F	-0.502811	-0.877664	-1.88897	-3.46429	Oxygen-evolving enhancer protein 2	Q00434.1	5e-147
Traes_2DL_6E913E1A4	-0.54011	-0.307785	-1.18363	-2.97162	Oxygen-evolving enhancer protein 2	EMT29894.1	1e-129
Traes_2DS_46C9F8F5F	-0.285773	-0.162398	-1.02546	-2.34158	Oxygen-evolving enhancer protein 3-1	EMT11196.1	1e-85
Traes_5BL_4B280E015	-0.427664	-0.529275	-1.20822	-2.30229	Photosystem I reaction center subunit II	P36213.1	8e-90
Traes_5DL_23458B3EB	-0.337903	-0.262765	-1.44246	-2.4308	Photosystem I reaction center subunit II	P36213.1	5e-36
Traes_5BL_7EDE873F5	-0.561507	-0.333984	-2.25827	-4.85212	Photosystem I reaction center subunit III	P13192.2	2e-118
Traes_5DL_3B463825A	-0.290896	-0.662705	-1.25822	-2.62125	Photosystem I reaction center subunit III	P13192.2	5e-84
Traes_5AL_3BA70504C	-0.649641	-0.435723	-1.99313	-4.35093	Photosystem I reaction center subunit IV	P13194.2	2e-30
Traes_5BL_044AAF401	-0.497588	-0.556678	-1.81372	-3.94353	Photosystem I reaction center subunit IV	P13194.2	8e-39
Traes_5DL_1A322A379	-0.335939	-0.444624	-1.15693	-2.90773	Photosystem I reaction center subunit IV	P13194.2	4e-33
Traes_2AS_D26D32A7C	0.0115754	0.0546769	-0.674049	-1.83699	Photosystem I reaction center subunit N	P31093.1	5e-63
Traes_2BS_F10DFB01C	-0.196753	0.0154107	-0.76497	-2.10169	Photosystem I reaction center subunit N	P31093.1	2e-65
Traes_2DS_5814764C5	-0.484332	-0.256826	-1.14802	-2.45355	Photosystem I reaction center subunit N	P31093.1	3e-63
Traes_2AL_14B62F6C1	-0.0163721	-0.0217493	-0.700589	-1.70654	Photosystem I reaction center subunit PsaK	EMS60576.1	1e-73
Traes_2BL_B614F03D1	0.344726	1.29929	0.193841	-0.695762	Photosystem I reaction center subunit PsaK	EMS60576.1	2e-74
Traes_2DL_E075C5750	-0.392341	-0.209736	-0.981459	-2.38296	Photosystem I reaction center subunit PsaK	EMT09915.1	1e-58
Traes_1AL_C42DE440F	-0.228745	-0.268767	-1.13912	-2.76765	Photosystem I reaction center subunit VI	EMT19581.1	1e-59
Traes_3AS_66523A57F1	-0.223426	-0.238186	-0.953192	-2.08651	Photosystem I reaction center subunit XI	EMT01873.1	4e-29
Traes_3B_3793EBCBE	-0.272093	-0.510645	-0.325269	-1.39979	Photosystem I reaction center subunit XI	EMS46316.1	1e-134
Traes_3DS_4EF0DAA39	-0.282874	-0.578362	-0.240892	-1.51125	Photosystem I reaction center subunit XI	EMT01873.1	6e-30
Traes_2AL_2317306B7	-0.292255	-0.397143	-2.21179	-2.73772	Photosystem I subunit O	XP_004975583.1	6e-75
Traes_2BL_96F12BAE2	-0.539329	-0.524274	-0.399031	-1.63275	Photosystem I subunit O	XP_003579709.1	9e-91
Traes_2DL_20DA8D2D5	-0.380156	-0.803758	-2.87601	-5.39473	Photosystem I subunit O	XP_003579709.1	7e-81
Traes_5BL_6E029E99B	-0.462517	-0.709196	-1.63166	-3.2699	Photosystem I subunit V	CAJ75642.1	2e-82
Traes_6BL_E4DC61863	0.920625	5.16733	5.70975	5.12549	Photosystem II 10 kDa protein	EMS68597.1	2e-17
Traes_6AL_48202E971	-0.168002	-0.406687	-0.593651	-1.48409	Photosystem II 10 kDa protein	EMT17346.1	2e-66
Traes_6AL_B393E6BCC	-0.179078	-0.216803	-1.32074	-2.98401	Photosystem II 10 kDa protein	EMS68597.1	5e-46
Traes_6BL_B51240ACF	0.23495	3.56605	2.84625	0.590614	Photosystem II 10 kDa protein	EMT17346.1	6e-73
Traes_6DL_DE5D1D2FD	-0.258792	-0.278514	-0.521699	-1.56204	Photosystem II 10 kDa protein	EMT01838.1	5e-45
Traes_3AL_B37D1E415	-0.428364	-1.03069	-4.62911	-6.42776	Photosystem II 22 kDa protein	EMT20518.1	1e-92
Traes_3B_D88E04B94	-0.237884	-0.434677	-0.596791	-1.66177	Photosystem II 22 kDa protein	XP_003564708.1	1e-116
Traes_3B_DCADC5DB7	-0.14958	0.0153894	-0.558927	-1.61773	Photosystem II reaction center W protein	AIA25852.1	9e-79
Traes_1AL_B5CB664F1	-0.2181	-0.0369127	-0.932108	-2.15116	Photosystem II reaction center W protein	EMS64749.1	2e-21
Traes_4DL_599E286321	-0.72719	1.00603	-1.16398	-2.06384	Photosystem II repair protein Psb27-H1	XP_003557974.1	3e-65
Traes_4AL_00D18D2CC	-0.360781	-0.548163	-1.50164	-3.04633	Plastocyanin	CAA68696.1	5e-60
Traes_7AS_F7BA8C654	-0.524091	-0.516431	-2.54841	-4.74433	Plastocyanin	CAA68696.1	2e-68
Traes_7DS_E424099181	-0.621927	-0.563913	-1.88462	-3.93948	Plastocyanin	XP_003557292.1	9e-46
Traes_4DS_35423C70B	-0.606362	1.18542	-0.909207	-2.06855	PsbQ-like protein 1	XP_003575224.1	2e-79
Traes_6AL_D2CA55216	-0.239952	-0.1128	-1.12005	-2.20456	PsbQ-like protein 1	XP_003575224.1	4e-80
Traes_6DL_C160E8CEF	-0.206463	-0.25585	-0.98556	-2.20149	PsbQ-like protein 1	XP_003575224.1	1e-79
