# Supplementary material for: Transcriptome Analysis of Early Senescence in the Post-Anthesis Flag Leaf of Wheat (Triticum aestivum L.)
Source: Plants (Basel). 2022 Oct 1;11(19):2593. doi: 10.3390/plants11192593 (PMC9572001; doi:10.3390/plants11192593)
Supplement: Supplementary file 1 [file plants-11-02593-s001.zip › Table S3. DEGs were identified as putative SAGs.xls]

## Sheet: Sheet1
Gene_id	Protein in LSD	E value	Species	Function	Effect on senescence	Evidence	Log2(Ratio)
							0DAA	15DAA	25DAA	30DAA
Traes_5AL_6C9A5537F	AJ549119.1	2e-65	Hordeum vulgare	Unknown	Unclear	Molecular evidence:Northern	-0.375621	-0.227266	-0.889272	2.9241
Traes_5BL_4BCE2DBEF	AJ549119.1	1e-67	Hordeum vulgare	Unknown	Unclear	Molecular evidence:Northern	-0.453115	-0.989447	-1.57512	1.21927
Traes_2AL_FC76D3EB9	AK059358.1	E-103	Hordeum vulgare	Unknown	Unclear	Molecular evidence:Northern	0.52412	0.323142	-0.617889	-1.10282
Traes_1BL_79D33BCB4	AM939937.1	1e-72	Triticum turgidum	Unknown	Unclear	Molecular evidence:cDNA-AFLP	-0.740767	-0.365809	0.782703	3.53324
Traes_1DS_4BB707532	AT1G01360.1	1e-72	Arabidopsis thaliana	Unknown	Unclear	Genomic evidence:microarray data	0.135792	-0.145067	0.38432	0.927528
Traes_2BS_891EC5836	AT1G01390.1	4e-76	Arabidopsis thaliana	Unknown	Unclear	Genomic evidence:microarray data	-0.099889	-0.0733623	1.1067	-2.33042
Traes_3B_3351E062B	AT1G01390.1	7e-55	Arabidopsis thaliana	Unknown	Unclear	Genomic evidence:microarray data	-0.451637	1.09154	1.33141	3.8341
Traes_3B_4966C803B1	AT1G01390.1	1e-60	Arabidopsis thaliana	Unknown	Unclear	Genomic evidence:microarray data	0.959878	1.87425	4.76215	6.57251
Traes_3B_8A4BD7BAE	AT1G01390.1	4e-54	Arabidopsis thaliana	Unknown	Unclear	Genomic evidence:microarray data	-2.01435	1.02207	3.07069	6.42686
Traes_1AL_DDEE6AC00	AT1G01470.1	2e-45	Arabidopsis thaliana	Unknown	Unclear	Genomic evidence:microarray data	-0.100532	-0.200478	0.557704	-0.389558
Traes_4AL_D9FFAAA1A	AT1G01820.1	E-101	Arabidopsis thaliana	Unknown	Unclear	Genomic evidence:microarray data	-0.417893	0.100993	1.5019	2.73989
Traes_7AS_D51B7852F	AT1G01820.1	1e-99	Arabidopsis thaliana	Unknown	Unclear	Genomic evidence:microarray data	-0.42067	0.187938	0.829835	2.03378
Traes_1AL_CEA78C84D	AT1G04770.1	2e-50	Arabidopsis thaliana	Unknown	Unclear	Genomic evidence:microarray data	0.842255	2.24481	1.68053	2.54413
Traes_1DL_36CEA53FD	AT1G04770.1	1e-88	Arabidopsis thaliana	Unknown	Unclear	Genomic evidence:microarray data	0.604125	1.41671	0.889994	2.05559
Traes_4AS_8E594F267	AT1G04770.1	6e-77	Arabidopsis thaliana	Unknown	Unclear	Genomic evidence:microarray data	1.44809	1.49834	0.895436	3.87508
Traes_2BL_5DFE6B3311	AT1G05570.1	0	Arabidopsis thaliana	Unknown	Unclear	Genomic evidence:microarray data	0.896229	-0.134273	-1.10002	-1.72976
Traes_4BL_A5ABCFCCB	AT1G05570.2	0	Arabidopsis thaliana	Unknown	Unclear	Genomic evidence:microarray data	0.0403017	0.764037	1.47855	1.32769
Traes_4DL_2DBB03D7E	AT1G05570.2	0	Arabidopsis thaliana	Unknown	Unclear	Genomic evidence:microarray data	0.167227	0.953422	1.67585	1.84704
Traes_1AL_55440EF31	AT1G07040.1	E-113	Arabidopsis thaliana	Unknown	Unclear	Genomic evidence:microarray data	0.477008	0.745754	3.63289	5.02058
Traes_1BL_EB95F4919	AT1G07040.1	E-114	Arabidopsis thaliana	Unknown	Unclear	Genomic evidence:microarray data	0.266298	0.601974	3.65899	5.05529
Traes_1DL_92F24F5E3	AT1G07040.1	E-112	Arabidopsis thaliana	Unknown	Unclear	Genomic evidence:microarray data	0.181795	1.21506	4.37987	5.90656
Traes_7AL_9F8C57492	AT1G10010.1	9e-56	Arabidopsis thaliana	Unknown	Unclear	Genomic evidence:microarray data	1.36099	-0.76703	0.395646	1.18915
Traes_4AS_6C0AB5E18	AT1G10070.2	E-124	Arabidopsis thaliana	Unknown	Unclear	Genomic evidence:microarray data	0.240562	0.962155	3.2368	5.40393
Traes_4DL_9D7A18BBC	AT1G10070.2	1e-92	Arabidopsis thaliana	Unknown	Unclear	Genomic evidence:microarray data	0.353547	0.0298887	2.97802	4.05733
Traes_1AS_429D67C42	AT1G11960.1	E-177	Arabidopsis thaliana	Unknown	Unclear	Genomic evidence:microarray data	0.467763	1.10263	-0.376155	-1.0743
Traes_1DS_5B9DD8319	AT1G11960.1	0	Arabidopsis thaliana	Unknown	Unclear	Genomic evidence:microarray data	0.656689	0.169543	-1.27372	-1.33727
Traes_4AL_5D644DE5A	AT1G14870.1	2e-48	Arabidopsis thaliana	Unknown	Unclear	Genomic evidence:microarray data	0.673137	2.01164	2.86954	7.38149
Traes_7AS_0EA301557	AT1G15690.1	E-154	Arabidopsis thaliana	Unknown	Unclear	Genomic evidence:microarray data	0.378023	1.31339	1.28445	1.73719
Traes_7BL_3D2347238	AT1G15690.1	1e-69	Arabidopsis thaliana	Unknown	Unclear	Genomic evidence:microarray data	-0.622561	-0.740769	-3.49776	-4.6971
Traes_7DL_3BA7EF708	AT1G15690.1	0	Arabidopsis thaliana	Unknown	Unclear	Genomic evidence:microarray data	-0.437972	-0.601041	-2.26658	-3.09645
Traes_7AS_848028906	AT1G15690.2	0	Arabidopsis thaliana	Unknown	Unclear	Genomic evidence:microarray data	0.29688	1.1146	1.15092	1.65014
Traes_7BL_FD4254327	AT1G15690.2	0	Arabidopsis thaliana	Unknown	Unclear	Genomic evidence:microarray data	-0.704586	-1.00175	-3.46916	-4.87574
Traes_2AL_C0E35470D	AT1G16180.2	E-137	Arabidopsis thaliana	Unknown	Unclear	Genomic evidence:microarray data	0.15152	0.301819	2.64635	2.45203
Traes_2BL_352A02A57	AT1G16180.2	E-108	Arabidopsis thaliana	Unknown	Unclear	Genomic evidence:microarray data	0.0568892	0.25121	1.85864	1.00143
Traes_2DL_7B0056729	AT1G16180.2	E-163	Arabidopsis thaliana	Unknown	Unclear	Genomic evidence:microarray data	0.0691149	0.055547	2.12293	1.55001
Traes_7BS_803489ECB	AT1G18270.1	0	Arabidopsis thaliana	Unknown	Unclear	Genomic evidence:microarray data	0.0138654	0.371105	1.06632	2.17773
Traes_4AL_BCBC1AEFB	AT1G18470.1	0	Arabidopsis thaliana	Unknown	Unclear	Genomic evidence:microarray data	-0.0432418	0.676159	1.32846	1.68487
Traes_4DS_83607CF31	AT1G18480.1	E-109	Arabidopsis thaliana	Zinc ion binding	Unclear	Genomic evidence:microarray data	0.804983	-1.78595	-0.461681	1.8463
Traes_1AL_AB89C36F8	AT1G21070.1	3e-54	Arabidopsis thaliana	Unknown	Unclear	Genomic evidence:microarray data	0.66987	0.550389	3.41917	4.26117
Traes_2AL_6C0963A18	AT1G21140.1	1e-59	Arabidopsis thaliana	Unknown	Unclear	Genomic evidence:microarray data	-0.0189664	2.44349	3.30876	4.26946
Traes_4BS_F66ADAFF1	AT1G21400.1	E-173	Arabidopsis thaliana	Unknown	Unclear	Genomic evidence:microarray data	0.640878	1.14094	3.43374	4.69226
Traes_5AS_96A151FEB	AT1G21400.1	E-166	Arabidopsis thaliana	Unknown	Unclear	Genomic evidence:microarray data	0.101535	-0.309088	1.66495	2.51772
Traes_5BL_BCA9D4B2F	AT1G21400.1	E-172	Arabidopsis thaliana	Unknown	Unclear	Genomic evidence:microarray data	0.137849	-0.612004	1.39943	1.93173
Traes_5BL_1667563F2	AT1G21680.1	E-165	Arabidopsis thaliana	Unknown	Unclear	Genomic evidence:microarray data	-0.116936	-0.954381	-1.21151	-1.78272
Traes_5BL_D81C2562D	AT1G21920.1	E-120	Arabidopsis thaliana	Unknown	Unclear	Genomic evidence:microarray data	-0.281846	0.949477	1.36432	2.70695
Traes_1BS_B8CD783A1	AT1G22400.1	E-115	Arabidopsis thaliana	Unknown	Unclear	Genomic evidence:microarray data	0.110735	0.19164	-0.928288	-1.26856
Traes_2AS_5EBF8EF1E	AT1G22400.1	E-147	Arabidopsis thaliana	Unknown	Unclear	Genomic evidence:microarray data	1.56984	-1.18041	-0.83544	1.66104
Traes_5DL_DEAD02939	AT1G22400.1	8e-55	Arabidopsis thaliana	Unknown	Unclear	Genomic evidence:microarray data	-0.979084	-0.979084	3.66029	7.2787
Traes_6AS_D68761CF8	AT1G22400.1	E-149	Arabidopsis thaliana	Unknown	Unclear	Genomic evidence:microarray data	-0.0594131	-1.14469	-4.61243	-6.8329
Traes_6DL_33F8A5EF4	AT1G23870.1	0	Arabidopsis thaliana	Transferase activity	Unclear	Genomic evidence:microarray data	-0.67432	-1.66733	-1.40404	-0.207592
Traes_2BL_3C4C930A1	AT1G26390.1	E-114	Arabidopsis thaliana	Alkaloid biosynthesis	Unclear	Genomic evidence:microarray data	1.02425	1.40568	2.6733	4.63264
Traes_4BS_A53FF3236	AT1G28330.1	1e-33	Arabidopsis thaliana	Unknown	Unclear	Genomic evidence:microarray data	-0.527837	1.31857	1.46477	1.8977
Traes_7AL_46EA905C1	AT1G32790.1	2e-88	Arabidopsis thaliana	Unknown	Unclear	Genomic evidence:microarray data	0.261535	0.329951	0.876589	1.48392
Traes_5AL_9697E163B	AT1G33110.1	7e-90	Arabidopsis thaliana	Unknown	Unclear	Genomic evidence:microarray data	0.752816	0.904224	2.44939	3.85296
Traes_5DL_27EBF2358	AT1G33110.1	E-177	Arabidopsis thaliana	Unknown	Unclear	Genomic evidence:microarray data	0.429141	2.3228	2.89405	4.09811
Traes_6AS_DBB035D55	AT1G33230.1	E-118	Arabidopsis thaliana	Unknown	Unclear	Genomic evidence:microarray data	-0.207208	-0.135197	0.568664	1.14475
Traes_2BL_0616D000D	AT1G43710.1	0	Arabidopsis thaliana	Unknown	Unclear	Genomic evidence:microarray data	-0.3252	0.131942	-1.81932	-1.5825
Traes_2DL_4A704421B	AT1G43710.1	0	Arabidopsis thaliana	Unknown	Unclear	Genomic evidence:microarray data	0.027642	0.885522	-1.0654	-1.13037
Traes_6DS_B856A1DFE	AT1G44542.1	2e-74	Arabidopsis thaliana	Unknown	Unclear	Genomic evidence:microarray data	-0.331325	0.274558	0.47485	-0.475177
Traes_5BL_A0350B6AB	AT1G50010.1	0	Arabidopsis thaliana	Unknown	Unclear	Genomic evidence:microarray data	-0.264679	0.984967	0.916643	0.936316
Traes_7DS_F5A240B02	AT1G55760.1	E-101	Arabidopsis thaliana	Unknown	Unclear	Genomic evidence:microarray data	0.278025	0.71271	1.62244	4.091
Traes_4AS_AA3629BB5	AT1G55920.1	3e-78	Arabidopsis thaliana	Unknown	Unclear	Genomic evidence:microarray data	-0.819193	-0.168853	2.27717	1.13883
Traes_5AS_D408E8790	AT1G58030.1	0	Arabidopsis thaliana	Unknown	Unclear	Genomic evidence:microarray data	-0.15626	-0.00241115	0.699943	2.22855
Traes_5BS_9384D46B3	AT1G58030.1	0	Arabidopsis thaliana	Unknown	Unclear	Genomic evidence:microarray data	-0.106073	-0.0466872	1.12955	1.93376
Traes_5DS_35A8DC140	AT1G58030.1	7e-42	Arabidopsis thaliana	Unknown	Unclear	Genomic evidence:microarray data	0.0283245	0.146121	1.04227	2.66409
Traes_5DS_E7A07F032	AT1G58030.1	E-177	Arabidopsis thaliana	Unknown	Unclear	Genomic evidence:microarray data	-0.140849	-0.0633205	1.02801	2.52594
Traes_5BL_0C2E9CD85	AT1G58180.2	2e-62	Arabidopsis thaliana	Unknown	Unclear	Genomic evidence:microarray data	0.437824	1.00484	2.587	3.16292
Traes_5DL_CA09C31F9	AT1G58180.2	2e-63	Arabidopsis thaliana	Unknown	Unclear	Genomic evidence:microarray data	0.0242335	1.03805	2.34767	3.50221
Traes_2AS_7B612C346	AT1G61800.1	E-154	Arabidopsis thaliana	Unknown	Unclear	Genomic evidence:microarray data	1.03558	0.176008	3.85479	3.2393
Traes_2BS_94C42CB70	AT1G61800.1	E-154	Arabidopsis thaliana	Unknown	Unclear	Genomic evidence:microarray data	0.94714	0.594202	2.1559	2.96551
Traes_2DS_FCCFA0BE1	AT1G61800.1	E-156	Arabidopsis thaliana	Unknown	Unclear	Genomic evidence:microarray data	0.500642	-1.09641	2.67401	2.2506
Traes_1AL_7C15494B7	AT1G64740.1	E-100	Arabidopsis thaliana	Cytoskeleton	Unclear	Genomic evidence:microarray data	-1.82738	-0.205614	0.556348	1.01592
Traes_2DL_784FC5773	AT1G65730.1	0	Arabidopsis thaliana	Unknown	Unclear	Genomic evidence:microarray data	-0.174454	-1.62244	-2.64093	0.636927
Traes_6AL_7FB45D4DE	AT1G65730.1	0	Arabidopsis thaliana	Unknown	Unclear	Genomic evidence:microarray data	0.0349242	1.39265	2.37884	2.14167
Traes_6DL_2918A17AC	AT1G65730.1	0	Arabidopsis thaliana	Unknown	Unclear	Genomic evidence:microarray data	0.365283	0.991796	2.81055	1.43543
Traes_2AL_85FCE950B	AT1G70580.2	0	Arabidopsis thaliana	Photorespiration	Unclear	Genomic evidence:microarray data	-0.263763	-0.172386	-0.970202	-1.60448
Traes_2BL_964FC881C	AT1G70580.2	0	Arabidopsis thaliana	Photorespiration	Unclear	Genomic evidence:microarray data	-0.249522	-0.185739	-0.95716	-1.70873
Traes_2DL_29112E9BD	AT1G70580.2	E-131	Arabidopsis thaliana	Photorespiration	Unclear	Genomic evidence:microarray data	-0.23136	-0.0480603	-0.910321	-1.63404
Traes_2DL_7052882A8	AT1G70580.2	E-114	Arabidopsis thaliana	Photorespiration	Unclear	Genomic evidence:microarray data	-0.296678	-0.116908	-0.974282	-1.86162
Traes_2BS_FF8887BE5	AT1G70980.1	E-101	Arabidopsis thaliana	Unknown	Unclear	Genomic evidence:microarray data	0.18077	-0.423506	-0.828071	-0.707966
Traes_2DS_05A402868	AT1G71100.1	3e-56	Arabidopsis thaliana	Unknown	Unclear	Genomic evidence:microarray data	-0.121055	-0.312474	-1.03021	-2.05339
Traes_6AS_26C64A3E5	AT1G71100.1	8e-55	Arabidopsis thaliana	Unknown	Unclear	Genomic evidence:microarray data	-0.153765	-0.403377	-0.864261	-1.84207
Traes_3AL_74A14ACC1	AT1G71190.1	2e-98	Arabidopsis thaliana	Unknown	Unclear	Molecular evidence:Blast search	-0.0516433	0.00741754	1.0166	2.16704
Traes_3DL_3FB6ABDC2	AT1G71190.1	2e-98	Arabidopsis thaliana	Unknown	Unclear	Molecular evidence:Blast search	0.281316	0.428914	1.53353	2.60331
Traes_3B_4F572760C	AT1G71190.2	1e-67	Arabidopsis thaliana	Unknown	Unclear	Molecular evidence:Blast search	-0.13782	0.260943	1.28303	2.39677
Traes_2BL_AA9337DF3	AT1G73220.1	3e-84	Arabidopsis thaliana	Unknown	Unclear	Proteomic evidence	2.01907	0.989693	6.49643	4.19536
Traes_4BS_C0973D1DA	AT1G77380.1	0	Arabidopsis thaliana	Unknown	Unclear	Genomic evidence:microarray data	0.393539	1.21152	1.26343	2.64514
Traes_4DS_374DADA2A	AT1G77380.1	0	Arabidopsis thaliana	Unknown	Unclear	Genomic evidence:microarray data	0.268205	1.06113	0.912894	2.69422
Traes_5AS_F58AC31EE	AT1G77380.1	3e-53	Arabidopsis thaliana	Unknown	Unclear	Genomic evidence:microarray data	-0.452066	-1.07742	-2.12009	0.515992
Traes_5DL_BB10A3B4B	AT1G77380.1	0	Arabidopsis thaliana	Unknown	Unclear	Genomic evidence:microarray data	-0.59855	-0.800662	-1.4343	0.458751
Traes_6DS_2D5421B49	AT1G77840.1	E-141	Arabidopsis thaliana	Unknown	Unclear	Genomic evidence:microarray data	0.268677	0.955172	0.907134	1.47947
Traes_4BL_04956D80D	AT1G78000.2	E-177	Arabidopsis thaliana	Unknown	Unclear	Genomic evidence:microarray data	-0.286623	0.0918025	-2.08322	-1.83471
Traes_4DL_58C874E07	AT1G78000.2	E-178	Arabidopsis thaliana	Unknown	Unclear	Genomic evidence:microarray data	0.0446202	-0.141968	-1.91594	-1.34678
Traes_5AL_1A881D2ED	AT1G78000.2	0	Arabidopsis thaliana	Unknown	Unclear	Genomic evidence:microarray data	0.509561	-0.519345	-0.544285	-0.892335
Traes_6AL_FD7E876FF	AT1G78260.1	6e-53	Arabidopsis thaliana	Unknown	Unclear	Genomic evidence:microarray data	0.0790338	0.479421	2.62958	5.07942
Traes_3B_5701EDAA9	AT1G79270.1	E-107	Arabidopsis thaliana	Unknown	Unclear	Genomic evidence:microarray data	-0.11231	0.694145	1.40414	2.32705
Traes_5DL_3356E1E85	AT1G79270.1	9e-77	Arabidopsis thaliana	Unknown	Unclear	Genomic evidence:microarray data	0.340624	1.20619	-0.566635	-1.04453
Traes_6AL_61200C99E	AT1G80940.1	7e-53	Arabidopsis thaliana	Unknown	Unclear	Molecular evidence:Blast search	-0.0350817	0.419065	1.32563	0.435327
Traes_4BL_718342997	AT2G14520.1	E-136	Arabidopsis thaliana	Unknown	Unclear	Genomic evidence:microarray data	0.0109715	0.744735	2.74628	3.30022
Traes_5BL_0DB47CE0A	AT2G17500.4	E-118	Arabidopsis thaliana	Unknown	Unclear	Genomic evidence:microarray data	0.549674	-1.40326	1.19176	2.1867
Traes_5DL_A8D6AD482	AT2G17500.4	E-130	Arabidopsis thaliana	Unknown	Unclear	Genomic evidence:microarray data	0.390972	-0.732583	1.2753	1.36663
Traes_5AL_230C2A244	AT2G20920.1	4e-55	Arabidopsis thaliana	Unknown	Unclear	Genomic evidence:microarray data	0.0278621	0.12403	0.796071	1.42285
Traes_4AS_BBF51CA2E	AT2G23150.1	0	Arabidopsis thaliana	Unknown	Unclear	Genomic evidence:microarray data	0.340747	1.42865	2.40868	3.6502
Traes_4BL_C6A3F5C8A	AT2G23150.1	0	Arabidopsis thaliana	Unknown	Unclear	Genomic evidence:microarray data	0.628152	1.09404	4.36906	4.83009
Traes_4DL_CA00023AB	AT2G23150.1	0	Arabidopsis thaliana	Unknown	Unclear	Genomic evidence:microarray data	0.507867	0.0202405	1.58482	1.95988
Traes_3AL_040E3794F	AT2G26230.1	4e-98	Arabidopsis thaliana	Unknown	Unclear	Genomic evidence:microarray data	0.266437	0.79775	1.93103	2.75411
Traes_3B_C9D86384C	AT2G26230.1	E-118	Arabidopsis thaliana	Unknown	Unclear	Genomic evidence:microarray data	0.263063	0.859858	2.0633	2.74291
Traes_3DL_4EDC6E291	AT2G26230.1	2e-82	Arabidopsis thaliana	Unknown	Unclear	Genomic evidence:microarray data	0.488184	1.25862	2.50799	3.354
Traes_5AL_3270507E2	AT2G31350.1	E-115	Arabidopsis thaliana	Unknown	Unclear	Genomic evidence:microarray data	-0.0487911	0.167164	0.677737	1.18088
Traes_3AL_1C47C0484	AT2G31820.1	1e-88	Arabidopsis thaliana	Unknown	Unclear	Genomic evidence:microarray data	-0.067829	-1.8054	-1.759	-1.38819
Traes_3B_446543473	AT2G31820.1	E-106	Arabidopsis thaliana	Unknown	Unclear	Genomic evidence:microarray data	-0.0193501	-1.79003	-0.640285	-0.570742
Traes_1AL_6B8FC4A0A	AT2G32260.1	E-107	Arabidopsis thaliana	Unknown	Unclear	Genomic evidence:microarray data	0.608603	1.86002	3.54627	2.3559
Traes_1DL_BB4F7933E	AT2G32260.1	E-106	Arabidopsis thaliana	Unknown	Unclear	Genomic evidence:microarray data	0.502645	1.19127	2.31928	1.18686
Traes_6BS_B0CA820F9	AT2G32260.1	E-115	Arabidopsis thaliana	Unknown	Unclear	Genomic evidence:microarray data	-0.188355	0.595608	2.52699	1.05459
Traes_6DS_FF48D4479	AT2G32260.1	E-115	Arabidopsis thaliana	Unknown	Unclear	Genomic evidence:microarray data	0.182004	0.238238	1.86206	0.93529
Traes_5AL_C1581C6C5	AT2G35060.1	0	Arabidopsis thaliana	Unknown	Unclear	Genomic evidence:microarray data	-0.0945646	0.348552	0.431609	1.5487
Traes_5BL_F112FA40E	AT2G35060.1	0	Arabidopsis thaliana	Unknown	Unclear	Genomic evidence:microarray data	-0.210971	0.0328153	0.424267	1.23832
Novel05433	AT2G36630.1	6e-88	Arabidopsis thaliana	Unknown	Unclear	Genomic evidence:microarray data	0.572136	-0.0167737	2.13053	1.30307
Traes_4BS_2A7D13468	AT2G36630.1	E-119	Arabidopsis thaliana	Unknown	Unclear	Genomic evidence:microarray data	0.945958	0.259049	2.87603	2.3931
Traes_4DS_826900E0C	AT2G36630.1	E-167	Arabidopsis thaliana	Unknown	Unclear	Genomic evidence:microarray data	0.739729	-0.220417	1.93122	1.9848
Traes_1DL_A890AB24C	AT2G38400.1	0	Arabidopsis thaliana	Unknown	Unclear	Genomic evidence:microarray data	0.481797	1.57353	3.83776	1.82974
Traes_5BL_FC28B66D8	AT2G38940.1	0	Arabidopsis thaliana	Unknown	Unclear	Genomic evidence:microarray data	0.814957	0.0116942	1.80012	0.084474
Traes_5DL_1B21D9A26	AT2G38940.1	E-102	Arabidopsis thaliana	Unknown	Unclear	Genomic evidence:microarray data	0.781647	-0.33005	1.63114	0.361037
Traes_5DL_391DF2590	AT2G38940.1	0	Arabidopsis thaliana	Unknown	Unclear	Genomic evidence:microarray data	0.791967	-0.159063	1.82189	0.639919
Traes_2AL_CD28AB70E	AT2G42490.1	0	Arabidopsis thaliana	Quinone binding	Unclear	Genomic evidence:microarray data	0.191449	0.508008	0.0336836	1.81481
Traes_2BL_FD8F6184B	AT2G42490.1	0	Arabidopsis thaliana	Quinone binding	Unclear	Genomic evidence:microarray data	0.287095	0.0286771	0.411677	2.5057
Traes_2DL_10BAF2D53	AT2G42490.1	E-179	Arabidopsis thaliana	Quinone binding	Unclear	Genomic evidence:microarray data	0.265038	0.697476	0.853533	2.80031
Traes_2DL_1FF716E43	AT2G42490.1	0	Arabidopsis thaliana	Quinone binding	Unclear	Genomic evidence:microarray data	0.266743	0.559655	0.88703	2.75907
Traes_2AL_CB95E606C	AT2G47000.1	0	Arabidopsis thaliana	Unknown	Unclear	Genomic evidence:microarray data	0.349474	1.39632	1.64505	1.37246
Traes_3AL_AA2B2E395	AT2G47000.1	0	Arabidopsis thaliana	Unknown	Unclear	Genomic evidence:microarray data	0.13831	0.35212	-0.546407	-0.753321
Traes_3AL_C3A46A4FB	AT2G47000.1	0	Arabidopsis thaliana	Unknown	Unclear	Genomic evidence:microarray data	2.3148	0.418531	2.35085	2.95223
Traes_3DL_B62A5FB0E	AT2G47000.1	0	Arabidopsis thaliana	Unknown	Unclear	Genomic evidence:microarray data	1.38661	0.738338	2.76775	4.13406
Traes_7DL_A745E3DBB	AT2G47000.1	0	Arabidopsis thaliana	Unknown	Unclear	Genomic evidence:microarray data	0.440376	-0.404537	4.35011	-0.728412
Traes_2AL_197BC062C	AT3G02520.1	E-122	Arabidopsis thaliana	Unknown	Unclear	Genomic evidence:microarray data	0.205904	0.432638	-0.497022	0.723666
Traes_2DL_A876E723B	AT3G02720.1	0	Arabidopsis thaliana	Unknown	Unclear	Genomic evidence:microarray data	0.0109034	-0.262151	-0.837323	-1.43849
Traes_3DL_07178E28A	AT3G02730.1	3e-45	Arabidopsis thaliana	Enzyme activator activity	Unclear	Genomic evidence:microarray data	-0.00751404	0.539243	1.92803	0.116515
Traes_1DL_7FD4EA081	AT3G05400.1	E-101	Arabidopsis thaliana	Unknown	Unclear	Genomic evidence:microarray data	0.37341	0.823181	1.81086	1.9948
Traes_4BL_8F2D39ABB	AT3G05400.1	5e-92	Arabidopsis thaliana	Unknown	Unclear	Genomic evidence:microarray data	-0.290933	-0.277308	0.710449	2.53641
Traes_1AS_A29124227	AT3G05500.1	8e-61	Arabidopsis thaliana	Unknown	Unclear	Genomic evidence:microarray data	-0.00499069	1.11027	0.746743	-0.528657
Traes_1BS_44C7DCE78	AT3G05500.1	2e-62	Arabidopsis thaliana	Unknown	Unclear	Genomic evidence:microarray data	-0.178613	1.03589	0.640446	-0.106943
Traes_1DS_2935DD94C	AT3G05500.1	5e-63	Arabidopsis thaliana	Unknown	Unclear	Genomic evidence:microarray data	-0.124401	0.911776	0.355005	-0.720074
Traes_1DS_FD879AB27	AT3G09850.1	E-116	Arabidopsis thaliana	Nucleic acid binding	Unclear	Genomic evidence:microarray data	-0.0572213	0.207479	1.69345	0.582427
Traes_3DL_A17930988	AT3G15290.1	1e-95	Arabidopsis thaliana	Unknown	Unclear	Genomic evidence:microarray data	0.332326	0.614641	2.32963	3.21207
Traes_2BL_0D44F4C96	AT3G16150.1	E-142	Arabidopsis thaliana	Unknown	Unclear	Genomic evidence:microarray data	-0.471055	-1.27427	0.150227	2.41668
Traes_3B_EE9156FFA	AT3G16240.1	6e-79	Arabidopsis thaliana	Unknown	Unclear	Genomic evidence:microarray data	-0.532382	0.871743	0.867961	0.926344
Traes_4DL_A379ABAE9	AT3G16240.1	4e-72	Arabidopsis thaliana	Unknown	Unclear	Genomic evidence:microarray data	-0.0928938	1.30782	1.91755	1.89944
Traes_7AL_CEA9B770B	AT3G16240.1	1e-80	Arabidopsis thaliana	Unknown	Unclear	Genomic evidence:microarray data	-0.428755	0.374511	2.04227	1.08468
Traes_7DL_AD746EA0B	AT3G16240.1	4e-89	Arabidopsis thaliana	Unknown	Unclear	Genomic evidence:microarray data	-1.31328	-1.98539	1.23434	-0.915497
Traes_2AS_3F30521B9	AT3G18830.1	E-158	Arabidopsis thaliana	Unknown	Unclear	Genomic evidence:microarray data	0.960677	-0.317111	2.14152	4.04367
Traes_2AS_BDB982457	AT3G18830.1	E-151	Arabidopsis thaliana	Unknown	Unclear	Genomic evidence:microarray data	0.536195	-1.02955	0.651733	1.47222
Traes_2BS_C8FB3060D	AT3G18830.1	0	Arabidopsis thaliana	Unknown	Unclear	Genomic evidence:microarray data	0.538311	-0.997721	0.717957	1.73166
Traes_2BS_D5A97B888	AT3G18830.1	E-166	Arabidopsis thaliana	Unknown	Unclear	Genomic evidence:microarray data	0.660148	-0.791531	1.76063	3.61062
Traes_4AS_52A387868	AT3G18830.1	E-165	Arabidopsis thaliana	Unknown	Unclear	Genomic evidence:microarray data	0.0988387	1.26594	1.16353	-0.0134022
Traes_4BS_6E9FDF39C	AT3G18830.1	E-130	Arabidopsis thaliana	Unknown	Unclear	Genomic evidence:microarray data	-0.0241932	0.720562	0.809747	-1.24733
Traes_4DS_E4F39963B	AT3G18830.1	E-131	Arabidopsis thaliana	Unknown	Unclear	Genomic evidence:microarray data	0.289096	-0.0134758	-0.579796	-1.98011
Traes_5BS_5B7315F37	AT3G18830.1	E-121	Arabidopsis thaliana	Unknown	Unclear	Genomic evidence:microarray data	0.107117	0.811432	2.52088	3.03093
Traes_7DL_B2EB69EC9	AT3G19970.1	E-109	Arabidopsis thaliana	Unknown	Unclear	Genomic evidence:microarray data	0.370602	-0.17275	4.59911	3.19302
Traes_3B_452F2EF42	AT3G21690.1	E-166	Arabidopsis thaliana	Unknown	Unclear	Genomic evidence:microarray data	1.3114	0.870308	-1.18921	-1.7066
Traes_3B_9F19C4F5A	AT3G21690.1	E-104	Arabidopsis thaliana	Unknown	Unclear	Genomic evidence:microarray data	0.0776365	0.243985	0.611057	3.22386
Traes_3B_C11E333EC	AT3G21690.1	E-164	Arabidopsis thaliana	Unknown	Unclear	Genomic evidence:microarray data	0.111351	-0.0136601	-0.304597	-1.27309
Traes_5BS_83CDABBCF	AT3G22740.1	E-102	Arabidopsis thaliana	Unknown	Unclear	Genomic evidence:microarray data	-0.169047	-0.714219	-1.81616	0.263257
Traes_5DS_9C45AD986	AT3G22740.1	E-117	Arabidopsis thaliana	Unknown	Unclear	Genomic evidence:microarray data	0.0832115	-0.739199	-1.58421	1.083
Traes_7AS_E62140C8E	AT3G25230.1	0	Arabidopsis thaliana	Unknown	Unclear	Genomic evidence:microarray data	-0.0269188	1.16428	0.349377	0.648343
Traes_2BL_D11F64BB4	AT3G25230.2	0	Arabidopsis thaliana	Unknown	Unclear	Genomic evidence:microarray data	0.459317	0.581488	1.44243	2.06113
Traes_2DL_F2D868473	AT3G25230.2	0	Arabidopsis thaliana	Unknown	Unclear	Genomic evidence:microarray data	0.93571	-0.586572	1.72836	2.91473
Traes_2AL_A1D5C3D71	AT3G25570.1	E-100	Arabidopsis thaliana	Unknown	Unclear	Molecular evidence:cDNA library	0.0849438	0.675953	2.43864	1.60897
Traes_2BL_D80441793	AT3G25570.1	1e-99	Arabidopsis thaliana	Unknown	Unclear	Molecular evidence:cDNA library	-0.0962911	0.135854	1.85818	1.00994
Traes_2DL_20E59C1C0	AT3G25570.1	3e-80	Arabidopsis thaliana	Unknown	Unclear	Molecular evidence:cDNA library	-0.102881	0.546273	2.36983	1.36566
Traes_6DL_B99906102	AT3G25570.1	2e-99	Arabidopsis thaliana	Unknown	Unclear	Molecular evidence:cDNA library	-0.389694	0.830079	0.414802	0.0611034
Traes_7DS_1F5ECF731	AT3G25610.1	0	Arabidopsis thaliana	Unknown	Unclear	Genomic evidence:microarray data	0.944217	0.752381	1.79585	1.27263
Traes_2BL_00211A25E	AT3G25740.1	E-103	Arabidopsis thaliana	Unknown	Unclear	Genomic evidence:microarray data	0.0490591	-0.285464	-0.787587	-1.39103
Traes_2DL_EA75078AE	AT3G25740.1	2e-83	Arabidopsis thaliana	Unknown	Unclear	Genomic evidence:microarray data	0.13339	-0.57569	-0.802918	-1.3093
Traes_7DS_60BE8BE43	AT3G26590.1	3e-75	Arabidopsis thaliana	Unknown	Unclear	Genomic evidence:microarray data	0.752797	2.55308	2.10976	1.95628
Novel01831	AT3G27020.1	E-157	Arabidopsis thaliana	Unknown	Unclear	Genomic evidence:microarray data	-0.214756	0.65605	1.37512	2.23309
Traes_2AL_349D3BE80	AT3G27020.1	2e-85	Arabidopsis thaliana	Unknown	Unclear	Genomic evidence:microarray data	0.16309	0.762318	1.44586	2.38638
Traes_2BL_0CBCC13AD	AT3G27020.1	0	Arabidopsis thaliana	Unknown	Unclear	Genomic evidence:microarray data	-0.0395818	1.02273	2.07471	2.76362
Traes_2BL_E4D41A32B	AT3G27020.1	5e-85	Arabidopsis thaliana	Unknown	Unclear	Genomic evidence:microarray data	-0.146329	0.568119	1.49766	2.22384
Traes_2DL_8732A1C56	AT3G27020.1	0	Arabidopsis thaliana	Unknown	Unclear	Genomic evidence:microarray data	-0.0171711	0.628159	1.02874	2.3951
Traes_2AL_D0DDA4776	AT3G44720.1	E-152	Arabidopsis thaliana	Unknown	Unclear	Molecular evidence: SSH and Northern	1.02027	-1.84329	-0.329866	0.524805
Traes_2BL_B3FFF8623	AT3G44720.1	E-152	Arabidopsis thaliana	Unknown	Unclear	Molecular evidence: SSH and Northern	1.07917	-2.2053	-0.497237	-0.24539
Traes_2AL_56247C7D9	AT3G47420.1	0	Arabidopsis thaliana	Unknown	Unclear	Genomic evidence:microarray data	-0.0398987	-0.239367	4.20701	2.19908
Traes_2BL_007AADDF1	AT3G47420.1	0	Arabidopsis thaliana	Unknown	Unclear	Genomic evidence:microarray data	0.0913893	-0.217377	4.8613	2.34605
Traes_7AL_D8FF3FF19	AT3G47420.1	0	Arabidopsis thaliana	Unknown	Unclear	Genomic evidence:microarray data	0.292429	0.942971	2.59365	2.44707
Traes_7DL_F4972CA5C	AT3G47420.1	0	Arabidopsis thaliana	Unknown	Unclear	Genomic evidence:microarray data	-0.0399436	-0.128375	1.81287	1.01392
Traes_1AL_3564C0828	AT3G47780.1	0	Arabidopsis thaliana	Unknown	Unclear	Genomic evidence:microarray data	1.01921	0.142443	0.947143	1.38634
Traes_1BL_9FCB31A4D	AT3G47780.1	0	Arabidopsis thaliana	Unknown	Unclear	Genomic evidence:microarray data	0.28337	0.74426	2.87776	3.37944
Traes_6AS_25CB8EBCD	AT3G47780.1	0	Arabidopsis thaliana	Unknown	Unclear	Genomic evidence:microarray data	2.20872e-05	0.0801222	-0.807798	-2.16075
Traes_6AL_64BAE3CE7	AT3G48740.1	2e-77	Arabidopsis thaliana	Unknown	Unclear	Genomic evidence:microarray data	-0.532538	-0.547421	-1.61517	-1.41735
Traes_5DL_3E5DAFBC3	AT3G48850.1	1e-95	Arabidopsis thaliana	Unknown	Unclear	Genomic evidence:microarray data	0.780256	0.0460472	2.02176	3.37797
Traes_5DL_75912CDD6	AT3G50830.1	1e-62	Arabidopsis thaliana	Unknown	Unclear	Genomic evidence:microarray data	0.0662903	1.64824	2.17946	3.34031
Traes_4AL_F2093E4D3	AT3G51000.1	5e-75	Arabidopsis thaliana	Unknown	Unclear	Genomic evidence:microarray data	1.20368	1.29072	2.66999	6.08494
Traes_5DL_742CCD4E0	AT3G51000.1	7e-77	Arabidopsis thaliana	Unknown	Unclear	Genomic evidence:microarray data	0.34569	-0.392986	-0.589736	2.49904
Traes_7DL_BE2E4A2BA	AT3G51130.1	0	Arabidopsis thaliana	Unknown	Unclear	Molecular evidence: SSH and Northern	-0.12973	0.149016	0.649338	1.41154
Traes_2AL_26065F906	AT3G51860.1	E-151	Arabidopsis thaliana	Unknown	Unclear	Genomic evidence:microarray data	-0.57537	0.2663	4.08965	1.75651
Traes_2DL_2A2F4F62B	AT3G51860.1	E-151	Arabidopsis thaliana	Unknown	Unclear	Genomic evidence:microarray data	0.287196	1.65273	4.32738	4.06124
Traes_3AL_224FB10D3	AT3G51895.1	E-128	Arabidopsis thaliana	Unknown	Unclear	Genomic evidence:microarray data	-0.208144	0.59491	3.08582	6.37968
Traes_4BL_9EC7914EB	AT3G52600.1	E-175	Arabidopsis thaliana	Unknown	Unclear	Genomic evidence:microarray data	1.54051	-0.0123208	-0.11006	0.722445
Traes_4DL_A0BAFF4CA	AT3G52600.1	E-180	Arabidopsis thaliana	Unknown	Unclear	Genomic evidence:microarray data	1.85171	-0.173495	-0.489894	0.282056
Traes_3B_DD99FFEEC	AT3G52820.1	4e-76	Arabidopsis thaliana	Unknown	Unclear	Genomic evidence:microarray data	0.203432	-0.445146	4.7729	1.57395
Traes_5BL_6D2126519	AT3G52820.1	1e-79	Arabidopsis thaliana	Unknown	Unclear	Genomic evidence:microarray data	-0.192585	-2.71341	2.25766	-1.68608
Traes_5DL_8A39C1525	AT3G52820.1	1e-59	Arabidopsis thaliana	Unknown	Unclear	Genomic evidence:microarray data	-0.0437585	-0.720537	3.62428	0.689348
Traes_6DS_FA56386F3	AT3G52820.1	E-151	Arabidopsis thaliana	Unknown	Unclear	Genomic evidence:microarray data	0.139458	0.314016	0.959026	1.3204
Traes_3AS_4B9462BD0	AT3G53150.1	E-119	Arabidopsis thaliana	Unknown	Unclear	Genomic evidence:microarray data	0.713793	-2.38912	-1.4052	1.16889
Traes_1BL_D0A3F2067	AT3G53750.1	0	Arabidopsis thaliana	Unknown	Unclear	Genomic evidence:microarray data	-0.00566215	1.02012	1.65044	2.19286
Traes_1DL_727F09EF8	AT3G53750.1	0	Arabidopsis thaliana	Unknown	Unclear	Genomic evidence:microarray data	0.187368	0.832607	1.31188	1.6905
Traes_3B_319690489	AT3G53750.1	0	Arabidopsis thaliana	Unknown	Unclear	Genomic evidence:microarray data	0.278546	0.530811	1.72106	2.07073
Traes_3B_32535F578	AT3G54140.1	E-165	Arabidopsis thaliana	Unknown	Unclear	Genomic evidence:microarray data	-0.291418	0.481703	1.04789	1.19448
Traes_3B_C8389D284	AT3G54140.1	E-122	Arabidopsis thaliana	Unknown	Unclear	Genomic evidence:microarray data	0.46948	-0.0241713	1.06817	2.01355
Traes_2AL_225DFC16A	AT3G54420.1	1e-89	Arabidopsis thaliana	Unknown	Unclear	Genomic evidence:microarray data	0.905399	-0.575512	-1.01191	-0.0712173
Traes_2AL_6162A036E	AT3G54420.1	8e-67	Arabidopsis thaliana	Unknown	Unclear	Genomic evidence:microarray data	0.877187	-0.66907	-0.626653	-0.00042249
Traes_2BL_2D440C559	AT3G54420.1	6e-86	Arabidopsis thaliana	Unknown	Unclear	Genomic evidence:microarray data	0.999824	-0.599632	-0.753894	0.480695
Traes_2BL_E366A5226	AT3G54420.1	3e-89	Arabidopsis thaliana	Unknown	Unclear	Genomic evidence:microarray data	0.630814	-1.41773	-1.11983	-2.17284
Traes_6DL_1BAFABCC2	AT3G54420.1	6e-94	Arabidopsis thaliana	Unknown	Unclear	Genomic evidence:microarray data	-0.756509	-3.19229	0.201861	2.00881
Traes_1BL_C6C3283C8	AT3G54800.2	0	Arabidopsis thaliana	Unknown	Unclear	Genomic evidence:microarray data	0.295474	0.552143	2.28658	3.1685
Traes_1DL_BDDF1198A	AT3G54800.2	0	Arabidopsis thaliana	Unknown	Unclear	Genomic evidence:microarray data	-0.64377	0.522822	2.23058	2.42663
Traes_3B_0B36CB0D3	AT3G56200.1	E-112	Arabidopsis thaliana	Unknown	Unclear	Genomic evidence:microarray data	0.0563414	-0.126441	-0.492062	2.47668
Traes_7BS_C473D2C4A	AT3G56200.1	1e-89	Arabidopsis thaliana	Unknown	Unclear	Genomic evidence:microarray data	0.209138	0.590654	0.578045	1.94698
Traes_7DL_DB979A72F	AT3G56200.1	E-111	Arabidopsis thaliana	Unknown	Unclear	Genomic evidence:microarray data	0.231207	0.208487	-0.153999	2.22754
Traes_7DS_B90ABD18C	AT3G56200.1	E-101	Arabidopsis thaliana	Unknown	Unclear	Genomic evidence:microarray data	0.0697087	0.549151	0.326258	1.86045
Traes_3B_7036B2F0B	AT3G57520.1	E-166	Arabidopsis thaliana	Unknown	Unclear	Genomic evidence:microarray data	-0.33382	-0.927384	-0.889257	-1.61877
Traes_5AS_535E8EC9E	AT3G57550.2	E-117	Arabidopsis thaliana	Unknown	Unclear	Genomic evidence:microarray data	0.698676	-1.137	-0.892265	-0.133075
Traes_7AS_95F4E4729	AT3G57680.1	E-150	Arabidopsis thaliana	Unknown	Unclear	Genomic evidence:microarray data	0.269731	2.22949	2.64169	3.06505
Traes_7BS_462DD3C32	AT3G57680.1	3e-88	Arabidopsis thaliana	Unknown	Unclear	Genomic evidence:microarray data	0.032726	2.41141	2.12734	1.84126
Traes_7DS_6333B91F8	AT3G57680.1	1e-95	Arabidopsis thaliana	Unknown	Unclear	Genomic evidence:microarray data	0.387436	1.87423	2.04971	1.80945
Traes_5BL_E3904C0B8	AT3G58750.1	E-129	Arabidopsis thaliana	Unknown	Unclear	Genomic evidence:microarray data	0.295863	0.324707	1.54138	2.61115
Traes_2AL_0F613C5AB	AT3G59580.2	E-175	Arabidopsis thaliana	Unknown	Unclear	Genomic evidence:microarray data	0.371144	0.928281	1.52105	1.96311
Traes_2AL_2F9F6DB1A	AT3G60160.1	0	Arabidopsis thaliana	Unknown	Unclear	Genomic evidence:microarray data	0.52686	1.3439	2.02343	1.87769
Traes_2BL_1395C82D5	AT3G60160.1	9e-93	Arabidopsis thaliana	Unknown	Unclear	Genomic evidence:microarray data	1.06494	2.10029	4.09644	2.92646
Traes_2BL_6FFD5A5E0	AT3G60160.1	0	Arabidopsis thaliana	Unknown	Unclear	Genomic evidence:microarray data	0.700607	1.46902	3.63567	2.40801
Traes_2DL_256EA81C0	AT3G60160.1	E-135	Arabidopsis thaliana	Unknown	Unclear	Genomic evidence:microarray data	0.471189	0.429932	3.05776	2.36813
Traes_2DL_E79ECCBC9	AT3G60160.1	0	Arabidopsis thaliana	Unknown	Unclear	Genomic evidence:microarray data	0.552555	0.729212	3.23935	2.64486
Traes_2BL_D94DC9302	AT3G63380.1	E-134	Arabidopsis thaliana	Unknown	Unclear	Genomic evidence:microarray data	-0.0412831	0.407416	-0.192357	-0.805342
Traes_5AL_FA3033A40	AT3G63380.1	0	Arabidopsis thaliana	Unknown	Unclear	Genomic evidence:microarray data	1.10206	1.28561	0.431409	-1.59158
Traes_5DL_DEDE5D8D8	AT3G63380.1	0	Arabidopsis thaliana	Unknown	Unclear	Genomic evidence:microarray data	0.885824	0.8005	-0.255497	-2.13541
Traes_6DS_E76EED926	AT3G63380.1	E-165	Arabidopsis thaliana	Unknown	Unclear	Genomic evidence:microarray data	0.93868	1.5005	0.114979	-0.395373
Traes_1AS_7BFBBDCE6	AT4G00900.1	0	Arabidopsis thaliana	Unknown	Unclear	Genomic evidence:microarray data	0.418216	-0.257929	1.17192	1.05615
Traes_1BS_F42414E18	AT4G00900.1	0	Arabidopsis thaliana	Unknown	Unclear	Genomic evidence:microarray data	0.713893	-0.729758	0.56065	0.324125
Traes_2BS_3C6D11BBA	AT4G02410.1	0	Arabidopsis thaliana	Unknown	Unclear	Genomic evidence:microarray data	0.918223	-1.17954	-1.71137	-1.15003
Traes_2DS_4D34CF603	AT4G02410.1	E-115	Arabidopsis thaliana	Unknown	Unclear	Genomic evidence:microarray data	-0.0021418	-2.46167	-1.23213	-0.3056
Traes_2DS_EAD1BE315	AT4G02410.1	E-141	Arabidopsis thaliana	Unknown	Unclear	Genomic evidence:microarray data	0.866689	0.978366	2.5346	3.25711
Traes_4AL_8C4927CF5	AT4G02410.1	E-173	Arabidopsis thaliana	Unknown	Unclear	Genomic evidence:microarray data	0.687761	-1.59366	-2.03739	-0.831668
Traes_5AL_E3F2E3C4C	AT4G02410.1	E-173	Arabidopsis thaliana	Unknown	Unclear	Genomic evidence:microarray data	0.113958	-0.916782	-1.6945	-2.61588
Traes_5DL_029CEF556	AT4G02410.1	E-170	Arabidopsis thaliana	Unknown	Unclear	Genomic evidence:microarray data	0.306182	-1.76599	-2.14372	-2.20667
Traes_2BS_FDB1D6573	AT4G03390.1	5e-87	Arabidopsis thaliana	Unknown	Unclear	Genomic evidence:microarray data	-0.128317	1.37744	2.28893	0.886862
Traes_2DS_2132DCCCC	AT4G03390.1	E-171	Arabidopsis thaliana	Unknown	Unclear	Genomic evidence:microarray data	-0.217937	-0.432884	1.15299	-1.04772
Traes_6AL_7444FD717	AT4G04800.1	4e-60	Arabidopsis thaliana	Unknown	Unclear	Genomic evidence:microarray data	-0.0455849	-0.840738	-1.41202	-0.501486
Traes_6DL_1047A9614	AT4G07390.1	2e-93	Arabidopsis thaliana	Unknown	Unclear	Genomic evidence:microarray data	0.0548931	0.91623	1.69991	2.26642
Traes_3B_DDE54BDCF	AT4G09640.1	E-126	Arabidopsis thaliana	Unknown	Unclear	Genomic evidence:microarray data	-0.279917	-0.707535	-1.40722	-2.45986
Traes_7DL_3AF4364DC	AT4G11220.1	1e-68	Arabidopsis thaliana	Unknown	Unclear	Genomic evidence:microarray data	0.119393	1.25295	0.0547852	1.35097
Traes_7AS_E1135D559	AT4G13020.4	E-104	Arabidopsis thaliana	Unknown	Unclear	Genomic evidence:microarray data	0.197382	0.5811	1.2356	1.14623
Traes_1AL_C2313FF27	AT4G13400.1	E-122	Arabidopsis thaliana	Unknown	Unclear	Genomic evidence:microarray data	-0.0463943	0.75512	1.38795	2.72952
Traes_1BL_26BC686B8	AT4G13400.1	E-122	Arabidopsis thaliana	Unknown	Unclear	Genomic evidence:microarray data	-0.288856	0.906478	3.07373	4.83469
Traes_1DL_1D2175392	AT4G13400.1	E-125	Arabidopsis thaliana	Unknown	Unclear	Genomic evidence:microarray data	0.0251127	0.462873	1.69949	3.86145
Traes_6AS_626A3D38C	AT4G15480.1	5e-62	Arabidopsis thaliana	Unknown	Unclear	Genomic evidence:microarray data	1.06812	1.16063	2.98576	2.67333
Novel04839	AT4G16070.1	1e-79	Arabidopsis thaliana	Unknown	Unclear	Genomic evidence:microarray data	0.0805729	0.279554	6.64771	2.60703
Traes_5AS_6F6C88D76	AT4G16070.1	E-103	Arabidopsis thaliana	Unknown	Unclear	Genomic evidence:microarray data	0.116597	0.662355	5.86597	2.9088
Traes_5BS_18387A867	AT4G16070.1	E-107	Arabidopsis thaliana	Unknown	Unclear	Genomic evidence:microarray data	0.657442	0.178308	5.63841	2.71475
Traes_5DS_382F5FE0F	AT4G16070.1	E-106	Arabidopsis thaliana	Unknown	Unclear	Genomic evidence:microarray data	0.555683	0.0275119	3.78355	1.05469
Traes_2AL_E32D2987E	AT4G17790.1	1e-96	Arabidopsis thaliana	Unknown	Unclear	Genomic evidence:microarray data	0.320015	-0.61119	1.23981	1.11643
Traes_2BL_DF71AA091	AT4G17790.1	4e-80	Arabidopsis thaliana	Unknown	Unclear	Genomic evidence:microarray data	0.285939	-0.257477	1.42868	1.97514
Traes_4DL_B5772B092	AT4G17840.1	E-122	Arabidopsis thaliana	Unknown	Unclear	Genomic evidence:microarray data	-0.489862	-0.153547	-0.235833	-1.5074
Traes_7DL_79127DD28	AT4G18800.1	8e-90	Arabidopsis thaliana	Unknown	Unclear	Genomic evidence:microarray data	0.541577	1.40394	1.86962	2.35163
Traes_3B_C0D770CC5	AT4G19840.1	3e-50	Arabidopsis thaliana	Unknown	Unclear	Genomic evidence:microarray data	-0.811578	0.194178	0.159468	1.99522
Traes_6AS_4FB64483A	AT4G19880.1	8e-98	Arabidopsis thaliana	Unknown	Unclear	Genomic evidence:microarray data	0.541993	-0.559371	0.135346	1.33204
Traes_2AL_56F4960EB	AT4G20110.1	E-114	Arabidopsis thaliana	Unknown	Unclear	Genomic evidence:microarray data	0.73124	-1.33386	-1.93507	-2.5486
Traes_2BL_D9F91A381	AT4G20110.1	0	Arabidopsis thaliana	Unknown	Unclear	Genomic evidence:microarray data	0.875549	-1.36732	-1.94937	-2.79481
Traes_2AL_490129FAB	AT4G21760.1	E-148	Arabidopsis thaliana	Unknown	Unclear	Genomic evidence:microarray data	-0.05989	0.413727	1.6394	2.1713
Traes_2AS_352D59E22	AT4G21760.1	E-149	Arabidopsis thaliana	Unknown	Unclear	Genomic evidence:microarray data	-0.0345089	-0.148379	0.751235	1.54836
Traes_2AS_CAA2FBF93	AT4G21760.1	E-112	Arabidopsis thaliana	Unknown	Unclear	Genomic evidence:microarray data	-0.1142	0.25201	0.626957	1.35496
Traes_2BL_C80835336	AT4G21760.1	E-149	Arabidopsis thaliana	Unknown	Unclear	Genomic evidence:microarray data	0.103927	2.49973	3.59465	3.47662
Traes_2BS_8B4CB340F	AT4G21760.1	E-133	Arabidopsis thaliana	Unknown	Unclear	Genomic evidence:microarray data	0.206575	-0.04993	1.363	4.14613
Traes_2DL_24AC58D40	AT4G21760.1	E-150	Arabidopsis thaliana	Unknown	Unclear	Genomic evidence:microarray data	-0.0579669	1.68921	1.18288	-0.0953704
Traes_2DS_A8043C04C	AT4G21760.1	E-134	Arabidopsis thaliana	Unknown	Unclear	Genomic evidence:microarray data	0.174307	0.7031	1.66457	2.33531
Traes_2BS_DDCEEE1DE	AT4G21990.1	0	Arabidopsis thaliana	Unknown	Unclear	Genomic evidence:microarray data	0.371501	1.94668	1.3156	1.60415
Traes_2DS_3FDB0BB63	AT4G21990.1	6e-36	Arabidopsis thaliana	Unknown	Unclear	Genomic evidence:microarray data	0.352311	1.88993	1.14777	1.50317
Traes_2DS_46D766017	AT4G21990.1	E-134	Arabidopsis thaliana	Unknown	Unclear	Genomic evidence:microarray data	0.296043	1.80605	1.17687	1.44252
Traes_1AL_26E629ECA	AT4G22220.1	8e-59	Arabidopsis thaliana	Unknown	Unclear	Genomic evidence:microarray data	-0.131946	0.831684	1.34643	2.14258
Traes_5DL_500C66579	AT4G22240.1	3e-70	Arabidopsis thaliana	Unknown	Unclear	Genomic evidence:microarray data	0.34287	0.503854	1.69766	2.74011
Traes_3AL_8A3E89EE7	AT4G23630.1	8e-88	Arabidopsis thaliana	Unknown	Unclear	Genomic evidence:microarray data	-0.183421	1.0801	-0.770474	0.777594
Traes_3B_864E474BF	AT4G23630.1	8e-94	Arabidopsis thaliana	Unknown	Unclear	Genomic evidence:microarray data	0.325352	1.0641	-0.205085	0.745706
Traes_1AL_9D3A2CA99	AT4G23920.1	E-161	Arabidopsis thaliana	Unknown	Unclear	Genomic evidence:microarray data	0.131623	1.35741	1.85429	0.871207
Traes_1AL_7531AC097	AT4G24040.1	E-125	Arabidopsis thaliana	Unknown	Unclear	Genomic evidence:microarray data	0.206819	0.467373	3.91812	2.57947
Traes_7AS_ECBB6F731	AT4G25100.1	1e-53	Arabidopsis thaliana	Unknown	Unclear	Genomic evidence:microarray data	0.574422	0.318208	-2.50034	-2.68789
Traes_4AL_688F0EA17	AT4G25910.1	4e-60	Arabidopsis thaliana	Unknown	Unclear	Genomic evidence:microarray data	0.454735	0.798139	1.67833	1.57734
Traes_4BS_838CF6BD4	AT4G25910.1	5e-60	Arabidopsis thaliana	Unknown	Unclear	Genomic evidence:microarray data	0.0440845	0.61825	1.45591	1.62021
Traes_3AL_EB7142B35	AT4G27020.1	0	Arabidopsis thaliana	Unknown	Unclear	Molecular evidence: SSH and Northern	0.426452	0.0725732	2.8085	3.25169
Traes_3B_7B3EFED12	AT4G27020.1	0	Arabidopsis thaliana	Unknown	Unclear	Molecular evidence: SSH and Northern	0.0946611	0.405008	2.58985	2.92944
Traes_3DL_CBD2F8833	AT4G27020.1	0	Arabidopsis thaliana	Unknown	Unclear	Molecular evidence: SSH and Northern	0.395202	0.90435	3.023	3.83431
Traes_5AL_192FDBBCB	AT4G27020.1	0	Arabidopsis thaliana	Unknown	Unclear	Molecular evidence: SSH and Northern	0.186977	0.485541	1.13521	1.77253
Traes_5BL_FB8D81F20	AT4G27020.1	0	Arabidopsis thaliana	Unknown	Unclear	Molecular evidence: SSH and Northern	0.129275	0.0727766	0.801265	1.1399
Traes_5DL_05EE63E0B	AT4G27020.1	0	Arabidopsis thaliana	Unknown	Unclear	Molecular evidence: SSH and Northern	0.22189	0.236555	1.20628	1.4754
Traes_7DL_25F652EA6	AT4G29160.1	6e-82	Arabidopsis thaliana	Unknown	Unclear	Genomic evidence:microarray data	0.221247	0.4243	0.960244	1.52767
Traes_7AL_8304348B7	AT4G30110.1	0	Arabidopsis thaliana	Unknown	Unclear	Genomic evidence:microarray data	-0.212012	0.703989	1.21927	2.84449
Traes_7DL_A5269C73F	AT4G30110.1	0	Arabidopsis thaliana	Unknown	Unclear	Genomic evidence:microarray data	-0.0778708	-0.0721839	0.67767	1.76581
Traes_6AL_D3BD3812C	AT4G30360.1	E-121	Arabidopsis thaliana	Unknown	Unclear	Genomic evidence:microarray data	0.212153	0.366492	-1.02554	-1.95383
Traes_5AL_9733BF17E	AT4G31820.1	E-160	Arabidopsis thaliana	Unknown	Unclear	Genomic evidence:microarray data	-0.133226	0.0808816	0.297525	1.33593
Traes_6AL_0F8A39C3D	AT4G31990.1	0	Arabidopsis thaliana	Unknown	Unclear	Genomic evidence:microarray data	0.315521	-0.0601447	-0.758741	-0.590787
Traes_6DL_961B6AFC5	AT4G31990.1	0	Arabidopsis thaliana	Unknown	Unclear	Genomic evidence:microarray data	0.355727	-0.237831	-0.788506	-0.693373
Traes_3B_7E0F61BC3	AT4G32510.1	0	Arabidopsis thaliana	Unknown	Unclear	Genomic evidence:microarray data	0.152693	1.1762	-1.98705	-2.75584
Traes_2DS_87661693E	AT4G32920.3	0	Arabidopsis thaliana	Unknown	Unclear	Genomic evidence:microarray data	-0.481966	0.756484	-0.470228	-1.30384
Traes_1AL_DF3BE19C4	AT4G33030.1	0	Arabidopsis thaliana	Unknown	Unclear	Molecular evidence:Blast search	0.0343556	-0.638099	1.39008	-0.470586
Traes_1BL_74B2CA073	AT4G33030.1	0	Arabidopsis thaliana	Unknown	Unclear	Molecular evidence:Blast search	0.157797	-0.475332	1.62031	-0.188147
Traes_1DL_5AFDF8430	AT4G33030.1	0	Arabidopsis thaliana	Unknown	Unclear	Molecular evidence:Blast search	0.173219	-0.446883	1.61705	-0.13355
Traes_6AL_6D310D2B0	AT4G33150.2	0	Arabidopsis thaliana	Unknown	Unclear	Genomic evidence:microarray data	0.0467686	1.4816	4.51202	5.70052
Traes_6BL_3430205E8	AT4G33150.2	0	Arabidopsis thaliana	Unknown	Unclear	Genomic evidence:microarray data	0.299918	1.42028	4.4132	5.6972
Traes_6DL_B78A92435	AT4G33150.2	0	Arabidopsis thaliana	Unknown	Unclear	Genomic evidence:microarray data	-1.2582	1.46666	4.40656	7.21375
Traes_5DL_9865B22EC	AT4G34120.1	2e-65	Arabidopsis thaliana	Unknown	Unclear	Genomic evidence:microarray data	0.378223	0.0690187	0.68953	1.25839
Traes_5BL_C09D655C6	AT4G34131.1	6e-61	Arabidopsis thaliana	Unknown	Unclear	Genomic evidence:microarray data	0.942128	-0.0333634	2.1817	0.667794
Traes_1AS_09E996677	AT4G34830.1	E-172	Arabidopsis thaliana	Unknown	Unclear	Genomic evidence:microarray data	-0.0147753	-0.0973736	-0.440988	-1.07309
Traes_3B_E23F2C86F	AT4G37900.1	E-162	Arabidopsis thaliana	Unknown	Unclear	Genomic evidence:microarray data	-1.64358	-2.25741	-3.63235	-2.45397
Traes_2AS_E90B5F3F6	AT4G37970.1	2e-81	Arabidopsis thaliana	Unknown	Unclear	Genomic evidence:microarray data	1.04157	-0.335812	-2.40635	-2.34803
Traes_5BL_22075E609	AT4G37970.1	E-124	Arabidopsis thaliana	Unknown	Unclear	Genomic evidence:microarray data	-0.808522	-3.03552	-4.75426	-5.87137
Traes_4AL_D6B61EC76	AT4G40030.2	3e-59	Arabidopsis thaliana	Unknown	Unclear	Genomic evidence:microarray data	0.00100655	0.4135	0.986853	1.21932
Traes_2AL_218CD1AAD	AT5G01220.1	0	Arabidopsis thaliana	Unknown	Unclear	Genomic evidence:microarray data	0.0387165	-0.564059	2.10989	-0.360515
Traes_2BL_4CF076AAB	AT5G01220.1	0	Arabidopsis thaliana	Unknown	Unclear	Genomic evidence:microarray data	-0.181128	-0.752029	1.67315	-0.521763
Traes_3AS_47F5392A3	AT5G01220.1	E-168	Arabidopsis thaliana	Unknown	Unclear	Genomic evidence:microarray data	0.354841	0.839776	4.15173	0.848641
Traes_3B_4DEB84E2E	AT5G01220.1	0	Arabidopsis thaliana	Unknown	Unclear	Genomic evidence:microarray data	-0.0124646	0.205376	3.6477	1.41865
Traes_3DS_01821AC73	AT5G01220.1	1e-27	Arabidopsis thaliana	Unknown	Unclear	Genomic evidence:microarray data	0.170877	-1.86109	5.55752	2.34725
Traes_3DS_CBE46365A	AT5G01220.1	E-101	Arabidopsis thaliana	Unknown	Unclear	Genomic evidence:microarray data	0.0268127	-1.2751	5.86559	2.59423
Traes_4DL_958E677DF	AT5G01220.1	E-170	Arabidopsis thaliana	Unknown	Unclear	Genomic evidence:microarray data	0.055533	-0.123259	1.48089	0.274699
Traes_4AS_9D6002759	AT5G02230.2	E-102	Arabidopsis thaliana	Unknown	Unclear	Genomic evidence:microarray data	0.90248	1.98871	2.27173	4.14482
Traes_4BL_72AC318FB	AT5G02230.2	E-102	Arabidopsis thaliana	Unknown	Unclear	Genomic evidence:microarray data	0.343912	1.22487	3.94775	4.84019
Traes_4DL_C9B1CD2AE	AT5G02230.2	E-103	Arabidopsis thaliana	Unknown	Unclear	Genomic evidence:microarray data	0.467567	1.70573	3.79906	5.73668
Traes_1AS_86422F191	AT5G02240.1	3e-74	Arabidopsis thaliana	Unknown	Unclear	Genomic evidence:microarray data	0.327928	-0.727575	-1.27304	-1.38844
Traes_1BS_E0A52650C	AT5G02240.1	E-111	Arabidopsis thaliana	Unknown	Unclear	Genomic evidence:microarray data	0.226282	-0.722866	-0.588661	-0.760601
Traes_1DS_B74218BA2	AT5G02240.1	E-112	Arabidopsis thaliana	Unknown	Unclear	Genomic evidence:microarray data	0.220501	-0.718591	-1.30188	-1.70158
Traes_5AL_A1C6F9E51	AT5G02240.1	1e-85	Arabidopsis thaliana	Unknown	Unclear	Genomic evidence:microarray data	0.344531	-0.664354	-0.951762	-0.776912
Traes_5BL_69A0036EA	AT5G02240.1	E-110	Arabidopsis thaliana	Unknown	Unclear	Genomic evidence:microarray data	0.465457	-0.859167	-1.01499	-0.571811
Traes_1DS_A56C094A2	AT5G02490.1	3e-99	Arabidopsis thaliana	Unknown	Unclear	Genomic evidence:microarray data	0.236055	0.0336612	-0.776477	-0.773009
Traes_4DL_1604A9F06	AT5G02490.1	1e-33	Arabidopsis thaliana	Unknown	Unclear	Genomic evidence:microarray data	-1.50386	1.50719	1.34806	1.84464
Novel02015	AT5G03240.1	5e-59	Arabidopsis thaliana	Unknown	Unclear	Genomic evidence:microarray data	0.125246	0.434977	0.479219	1.45566
Traes_6AL_199354A39	AT5G03260.1	4e-66	Arabidopsis thaliana	Unknown	Unclear	Genomic evidence:microarray data	-1.45138	-0.379591	2.76782	7.45575
Traes_6DL_A64E46F8B	AT5G03260.1	E-154	Arabidopsis thaliana	Unknown	Unclear	Genomic evidence:microarray data	-1.03839	1.37409	4.31411	8.92623
Traes_4BL_21CD1442B	AT5G03340.1	E-104	Arabidopsis thaliana	Unknown	Unclear	Genomic evidence:microarray data	0.240717	0.606995	2.09056	1.38419
Traes_4BL_56CAC194E	AT5G03340.1	0	Arabidopsis thaliana	Unknown	Unclear	Genomic evidence:microarray data	0.1616	0.438202	2.02814	1.28086
Traes_4DL_DBA53B48C	AT5G03340.1	0	Arabidopsis thaliana	Unknown	Unclear	Genomic evidence:microarray data	0.179535	0.716783	1.51757	1.34837
Traes_1BL_C9DE3E14F	AT5G03380.1	2e-56	Arabidopsis thaliana	Unknown	Unclear	Genomic evidence:microarray data	0.0111345	-1.15663	-0.910458	-0.959463
Traes_7AL_FF5852F09	AT5G03760.1	0	Arabidopsis thaliana	Unknown	Unclear	Genomic evidence:microarray data	1.09803	-0.485107	-1.84709	-4.10991
Traes_7BL_D0D116361	AT5G03760.1	E-172	Arabidopsis thaliana	Unknown	Unclear	Genomic evidence:microarray data	1.32753	-0.438939	-2.02533	-4.25437
Traes_7DL_1A45BDE27	AT5G03760.1	0	Arabidopsis thaliana	Unknown	Unclear	Genomic evidence:microarray data	1.12639	-0.156356	-2.13397	-3.98532
Traes_7AS_486DFA7A6	AT5G04540.1	0	Arabidopsis thaliana	Unknown	Unclear	Genomic evidence:microarray data	0.121602	0.254486	1.26602	2.39212
Traes_6BS_4422D6A50	AT5G06130.2	E-100	Arabidopsis thaliana	Unknown	Unclear	Molecular evidence:Blast search	0.145094	-0.752008	-1.25391	-1.71142
Traes_6DL_C9E4F43B3	AT5G06130.2	E-100	Arabidopsis thaliana	Unknown	Unclear	Molecular evidence:Blast search	-0.0389525	-0.631358	-0.845556	-1.37067
Traes_1BL_AD1AD2198	AT5G06370.1	5e-97	Arabidopsis thaliana	Unknown	Unclear	Genomic evidence:microarray data	-0.167035	0.013868	0.412224	1.14482
Traes_4AS_C710FA713	AT5G06530.2	0	Arabidopsis thaliana	Unknown	Unclear	Molecular evidence:Blast search	0.18284	1.38073	0.630161	-0.547681
Traes_7AS_CDF144498	AT5G07250.1	5e-96	Arabidopsis thaliana	Unknown	Unclear	Genomic evidence:microarray data	-0.096582	0.751176	0.943535	3.14416
Traes_6DS_E495A59D3	AT5G07840.1	5e-55	Arabidopsis thaliana	Unknown	Unclear	Genomic evidence:microarray data	-0.156237	-0.064172	0.0986906	1.32298
Traes_1BL_0D7C2EB91	AT5G08370.1	E-147	Arabidopsis thaliana	Unknown	Unclear	Genomic evidence:microarray data	-0.601618	-0.860398	-1.02716	-1.98111
Traes_5AS_2696E750F	AT5G08560.2	0	Arabidopsis thaliana	Unknown	Unclear	Genomic evidence:microarray data	0.17084	0.428906	0.742735	1.5924
Traes_4AS_A2EBBF6BC	AT5G09730.1	0	Arabidopsis thaliana	Unknown	Unclear	Genomic evidence:microarray data	-0.243482	-0.472292	-3.06028	-3.37747
Traes_4AL_61A99532C	AT5G10860.1	3e-85	Arabidopsis thaliana	Unknown	Unclear	Molecular evidence: SSH and Northern	-0.290883	-0.541557	-1.48919	-1.03976
Traes_4DS_4D761086B	AT5G10860.1	1e-86	Arabidopsis thaliana	Unknown	Unclear	Molecular evidence: SSH and Northern	-0.415338	-0.757812	-1.70415	-1.18174
Traes_7AS_0912FBF02	AT5G11210.1	6e-77	Arabidopsis thaliana	Unknown	Unclear	Molecular evidence:cDNA library	0.837523	1.31372	-0.107603	-2.1142
Traes_3AL_2F8FFD71C	AT5G12200.1	0	Arabidopsis thaliana	Unknown	Unclear	Genomic evidence:microarray data	-0.214307	0.377112	1.56722	3.08417
Traes_3B_F89F5E23F	AT5G12200.1	0	Arabidopsis thaliana	Unknown	Unclear	Genomic evidence:microarray data	-0.00671665	0.591433	1.71752	2.6368
Traes_3DL_B8D90369B	AT5G12200.1	E-128	Arabidopsis thaliana	Unknown	Unclear	Genomic evidence:microarray data	-0.0423661	0.460051	1.27395	2.21902
Traes_3DL_DD07A83E2	AT5G12200.1	E-116	Arabidopsis thaliana	Unknown	Unclear	Genomic evidence:microarray data	0.14164	0.650366	1.39651	2.28476
Traes_5AL_1F90AF47B	AT5G13550.1	0	Arabidopsis thaliana	Unknown	Unclear	Genomic evidence:microarray data	0.270668	0.583548	0.0868668	1.75548
Traes_7AS_779E8A5D2	AT5G16840.2	2e-80	Arabidopsis thaliana	Unknown	Unclear	Genomic evidence:microarray data	0.140931	0.629718	0.77062	1.49819
Novel05355	AT5G16910.1	0	Arabidopsis thaliana	Unknown	Unclear	Genomic evidence:microarray data	0.309694	-1.45723	-0.658567	-0.513724
Novel11681	AT5G16910.1	0	Arabidopsis thaliana	Unknown	Unclear	Genomic evidence:microarray data	0.184733	-1.86401	-1.75863	-1.56968
Traes_5BS_87F876396	AT5G17230.1	E-126	Arabidopsis thaliana	Unknown	Unclear	Molecular evidence:Blast search	-0.019337	0.417708	-0.283164	-2.60106
Traes_5DS_EAD24AD6B	AT5G17230.1	E-138	Arabidopsis thaliana	Unknown	Unclear	Molecular evidence:Blast search	-0.24896	-0.356951	-1.19034	-2.8759
Traes_7DL_BDE14D8F9	AT5G17230.1	E-144	Arabidopsis thaliana	Unknown	Unclear	Molecular evidence:Blast search	-0.116666	-0.0621355	-1.06098	-3.37733
Traes_2AS_4A166E7F4	AT5G18630.1	6e-65	Arabidopsis thaliana	Unknown	Unclear	Genomic evidence:microarray data	-0.0337145	0.260606	4.91749	1.65801
Traes_2BS_1F655F5E3	AT5G18630.1	2e-70	Arabidopsis thaliana	Unknown	Unclear	Genomic evidence:microarray data	-0.260342	0.516501	5.16969	3.42772
Traes_2AS_64994F26C	AT5G18630.2	E-105	Arabidopsis thaliana	Unknown	Unclear	Genomic evidence:microarray data	-0.0929165	0.345973	2.26754	4.30179
Traes_2DS_651F3DCBE	AT5G18630.2	E-107	Arabidopsis thaliana	Unknown	Unclear	Genomic evidence:microarray data	0.0520631	0.489326	5.36556	3.95109
Traes_5BL_D5FFA0E4D	AT5G19440.1	2e-70	Arabidopsis thaliana	Unknown	Unclear	Genomic evidence:microarray data	-0.0284292	0.610538	0.877894	-0.194825
Traes_4AS_5A3BD41C7	AT5G19780.1	0	Arabidopsis thaliana	Unknown	Unclear	Genomic evidence:microarray data	0.204351	0.680596	1.44179	1.40087
Traes_7AS_2742DDF6C	AT5G20830.2	0	Arabidopsis thaliana	Unknown	Unclear	Genomic evidence:microarray data	0.133836	0.277673	1.61371	0.300342
Traes_7BS_182F2A1F1	AT5G20830.2	0	Arabidopsis thaliana	Unknown	Unclear	Genomic evidence:microarray data	-0.157237	-0.129036	1.6063	0.250379
Traes_7DS_529BAB150	AT5G20830.2	0	Arabidopsis thaliana	Unknown	Unclear	Genomic evidence:microarray data	-0.196046	-0.439906	0.535514	-1.91306
Traes_3DL_5DE96C1D2	AT5G21274.1	3e-76	Arabidopsis thaliana	Unknown	Unclear	Genomic evidence:microarray data	-0.111371	0.655618	1.06893	0.586751
Traes_5DL_FBCE5007F	AT5G23020.1	E-143	Arabidopsis thaliana	Unknown	Unclear	Genomic evidence:microarray data	0.0207837	-0.437143	-0.208319	1.12403
Traes_2AL_7CEF57402	AT5G23270.1	0	Arabidopsis thaliana	Unknown	Unclear	Genomic evidence:microarray data	0.97001	-0.395529	-1.29224	-0.790058
Traes_2BL_D7C4154FA	AT5G23270.1	0	Arabidopsis thaliana	Unknown	Unclear	Genomic evidence:microarray data	0.8538	-0.819302	-1.29764	-0.54418
Traes_2DL_9A67DCEEE	AT5G23270.1	2e-51	Arabidopsis thaliana	Unknown	Unclear	Genomic evidence:microarray data	0.935702	-0.806097	-1.77523	-0.609137
Traes_2AS_BA3589B63	AT5G24420.1	1e-55	Arabidopsis thaliana	Unknown	Unclear	Genomic evidence:microarray data	0.0913533	1.65822	1.44963	0.622002
Traes_2BL_E7EF8089C	AT5G26340.1	E-113	Arabidopsis thaliana	Unknown	Unclear	Genomic evidence:microarray data	0.178917	1.79591	3.80736	7.93897
Traes_4AS_7258345F9	AT5G26340.1	0	Arabidopsis thaliana	Unknown	Unclear	Genomic evidence:microarray data	0.680453	-0.225699	-1.63557	-1.0711
Traes_4BL_2CD045152	AT5G26340.1	0	Arabidopsis thaliana	Unknown	Unclear	Genomic evidence:microarray data	1.06373	-1.40997	-0.605534	0.352126
Traes_4DL_CFC191A06	AT5G26340.1	0	Arabidopsis thaliana	Unknown	Unclear	Genomic evidence:microarray data	0.707327	-1.24128	-1.4133	-0.445437
Traes_5DL_D85DBC184	AT5G26340.1	E-145	Arabidopsis thaliana	Unknown	Unclear	Genomic evidence:microarray data	0.134292	-0.774255	-0.0417662	0.365827
Traes_2AL_E80950527	AT5G33280.1	0	Arabidopsis thaliana	Unknown	Unclear	Genomic evidence:microarray data	0.0948398	-0.185039	0.98613	1.61172
Traes_2BL_1356B2300	AT5G33280.1	0	Arabidopsis thaliana	Unknown	Unclear	Genomic evidence:microarray data	0.389456	-0.267562	0.919644	1.72416
Traes_2DL_2924C6399	AT5G33280.1	0	Arabidopsis thaliana	Unknown	Unclear	Genomic evidence:microarray data	0.164674	-0.085297	1.52827	2.37658
Traes_3AS_AA4DE445B	AT5G33280.1	0	Arabidopsis thaliana	Unknown	Unclear	Genomic evidence:microarray data	-0.394319	0.0590887	-0.117145	1.17881
Traes_5BL_47E0179A2	AT5G35580.1	E-121	Arabidopsis thaliana	Unknown	Unclear	Genomic evidence:microarray data	-0.304561	-1.23263	2.22664	3.38564
Traes_5DL_4832F80AE	AT5G35580.1	E-100	Arabidopsis thaliana	Unknown	Unclear	Genomic evidence:microarray data	-0.25467	-0.419722	2.1233	6.2514
Traes_6AS_46D5BC324	AT5G35580.1	E-105	Arabidopsis thaliana	Unknown	Unclear	Genomic evidence:microarray data	0.107092	-0.21275	-0.725468	-2.19528
Traes_6DS_228E120CD	AT5G35580.1	E-106	Arabidopsis thaliana	Unknown	Unclear	Genomic evidence:microarray data	0.361917	-0.0813188	-0.970629	-2.54543
Traes_7BS_4E92D6888	AT5G40670.1	E-104	Arabidopsis thaliana	Unknown	Unclear	Genomic evidence:microarray data	0.158506	0.275404	0.487616	1.61018
Traes_3AL_DABE7199F	AT5G41080.1	6e-96	Arabidopsis thaliana	Unknown	Unclear	Genomic evidence:microarray data	-0.952203	-1.4759	3.93832	1.46256
Traes_3B_6A3604BF5	AT5G41080.1	1e-66	Arabidopsis thaliana	Unknown	Unclear	Genomic evidence:microarray data	-0.332546	-1.86301	4.25841	1.45735
Traes_3B_C3C710885	AT5G41080.1	7e-75	Arabidopsis thaliana	Unknown	Unclear	Genomic evidence:microarray data	-0.336014	-1.76039	4.38381	1.45999
Traes_3DL_01383BD6A	AT5G41080.1	3e-49	Arabidopsis thaliana	Unknown	Unclear	Genomic evidence:microarray data	-0.52276	-1.40058	4.05984	1.28308
Traes_7DS_8B69EA343	AT5G41080.1	3e-86	Arabidopsis thaliana	Unknown	Unclear	Genomic evidence:microarray data	-0.555432	-0.447992	5.921	1.67844
Traes_1AL_0DBA14C6C	AT5G41800.1	E-173	Arabidopsis thaliana	Unknown	Unclear	Genomic evidence:microarray data	-0.106476	0.0369979	0.702014	1.98968
Traes_6BL_BABA3F1F0	AT5G43900.1	0	Arabidopsis thaliana	Structural	Unclear	Genomic evidence:microarray data	0.0980311	0.492311	0.609333	1.56924
Traes_2BS_F73EFC0DE	AT5G43950.1	E-128	Arabidopsis thaliana	Unknown	Unclear	Genomic evidence:microarray data	0.565804	0.217172	6.76362	7.93879
Traes_2BS_064B02A89	AT5G44030.1	0	Arabidopsis thaliana	Unknown	Unclear	Genomic evidence:microarray data	-0.274414	0.180864	0.346425	1.29088
Traes_2DS_C80293002	AT5G44030.1	0	Arabidopsis thaliana	Unknown	Unclear	Genomic evidence:microarray data	-0.219094	0.401043	0.352213	1.1381
Traes_6DL_9E32F18C1	AT5G45160.1	3e-92	Arabidopsis thaliana	Unknown	Unclear	Genomic evidence:microarray data	-0.168851	0.713938	2.9792	5.23514
Traes_6DL_C20FB9D01	AT5G45160.1	E-158	Arabidopsis thaliana	Unknown	Unclear	Genomic evidence:microarray data	-0.296823	0.893983	3.31046	5.44506
Traes_4DL_A6C2EE5BC	AT5G46050.1	E-137	Arabidopsis thaliana	Unknown	Unclear	Genomic evidence:microarray data	0.510631	0.621078	3.40585	3.91344
Traes_5AL_8349DE248	AT5G46180.1	0	Arabidopsis thaliana	Unknown	Unclear	Genomic evidence:microarray data	0.36108	0.749969	2.61089	3.87872
Traes_5BL_1D3F1BCC2	AT5G46180.1	0	Arabidopsis thaliana	Unknown	Unclear	Genomic evidence:microarray data	0.244073	0.326824	1.81778	2.75884
Traes_5DL_AC1F44221	AT5G46180.1	0	Arabidopsis thaliana	Unknown	Unclear	Genomic evidence:microarray data	0.307796	0.63419	2.26978	3.37715
Traes_2AL_AAD8D4641	AT5G47240.1	E-103	Arabidopsis thaliana	Unknown	Unclear	Genomic evidence:microarray data	-0.334384	-1.06652	1.16788	0.546806
Traes_2BL_4A529675B	AT5G47240.1	E-101	Arabidopsis thaliana	Unknown	Unclear	Genomic evidence:microarray data	-0.55962	-2.2133	1.30671	0.263875
Traes_3B_D6E12C0A1	AT5G47560.1	0	Arabidopsis thaliana	Unknown	Unclear	Genomic evidence:microarray data	0.356645	2.16632	4.85982	5.5112
Traes_5DL_A86D8E03D	AT5G47560.1	0	Arabidopsis thaliana	Unknown	Unclear	Genomic evidence:microarray data	0.343465	-0.0578759	1.56665	4.12162
Traes_1BL_6B21370DA	AT5G47880.2	0	Arabidopsis thaliana	Unknown	Unclear	Genomic evidence:microarray data	-0.418462	1.55019	3.14083	4.13501
Traes_1DL_9DC127B0C	AT5G47880.2	3e-74	Arabidopsis thaliana	Unknown	Unclear	Genomic evidence:microarray data	0.0112015	1.16116	2.45373	3.61237
Traes_3DL_0B2FD4A97	AT5G47880.2	0	Arabidopsis thaliana	Unknown	Unclear	Genomic evidence:microarray data	0.411471	0.656732	1.18694	1.81927
Traes_2AL_2A274FDB8	AT5G49740.1	0	Arabidopsis thaliana	Unknown	Unclear	Genomic evidence:microarray data	-0.622712	-0.80398	-2.42671	-3.39645
Traes_2BL_C7CDCB39A	AT5G49740.1	0	Arabidopsis thaliana	Unknown	Unclear	Genomic evidence:microarray data	-0.714743	-0.435921	-2.70003	-4.33683
Traes_2DL_AB324879E	AT5G49740.1	0	Arabidopsis thaliana	Unknown	Unclear	Genomic evidence:microarray data	-0.991093	-0.503096	-3.07766	-4.70595
Traes_6AL_BC88BF232	AT5G50960.1	E-161	Arabidopsis thaliana	Unknown	Unclear	Genomic evidence:microarray data	0.346533	0.779238	1.49269	1.52463
Traes_5BL_97BEC5636	AT5G52450.1	E-159	Arabidopsis thaliana	Unknown	Unclear	Genomic evidence:microarray data	0.396832	-0.402633	1.10706	1.18523
Traes_2BS_225093E70	AT5G52970.1	3e-74	Arabidopsis thaliana	Unknown	Unclear	Genomic evidence:microarray data	0.167476	-1.04948	-1.10528	-2.17446
Traes_6AS_E011BC5BB	AT5G53300.2	2e-76	Arabidopsis thaliana	Unknown	Unclear	Genomic evidence:microarray data	-0.331288	-0.417182	0.590207	1.71164
Traes_2AL_CFCA01C76	AT5G53550.1	0	Arabidopsis thaliana	Unknown	Unclear	Molecular evidence:DDRT-PCR	0.0573481	1.37891	2.39233	2.55441
Traes_2DL_131222AE2	AT5G53550.1	0	Arabidopsis thaliana	Unknown	Unclear	Molecular evidence:DDRT-PCR	-0.226296	0.766943	2.54007	3.28671
Traes_2DL_8C4BFA3CB	AT5G53550.1	0	Arabidopsis thaliana	Unknown	Unclear	Molecular evidence:DDRT-PCR	-0.0290402	0.463376	0.74641	1.32673
Traes_7AS_A93890FE4	AT5G54080.2	E-142	Arabidopsis thaliana	Unknown	Unclear	Genomic evidence:microarray data	0.195242	0.695196	2.67138	3.12073
Traes_7DS_4EB9095AA	AT5G54080.2	E-142	Arabidopsis thaliana	Unknown	Unclear	Genomic evidence:microarray data	0.311211	0.869672	2.67642	3.12475
Traes_1AL_990E4507E	AT5G55900.1	E-109	Arabidopsis thaliana	Unknown	Unclear	Genomic evidence:microarray data	0.225466	0.457173	1.00854	1.39096
Traes_1DL_391AD5E34	AT5G55900.1	5e-87	Arabidopsis thaliana	Unknown	Unclear	Genomic evidence:microarray data	0.0230513	0.447074	1.04994	1.49014
Traes_3B_5C008399F	AT5G56350.1	0	Arabidopsis thaliana	Unknown	Unclear	Genomic evidence:microarray data	0.0365739	0.851542	1.37148	1.56596
Traes_4AS_BB59116B6	AT5G56870.1	0	Arabidopsis thaliana	Unknown	Unclear	Genomic evidence:microarray data	-0.33732	-1.10633	0.301489	2.96583
Traes_5AL_16733B284	AT5G56870.1	7e-69	Arabidopsis thaliana	Unknown	Unclear	Genomic evidence:microarray data	0.00330828	0.0824409	-0.00997295	1.41916
Traes_1BS_C012FD5DC	AT5G57010.1	E-115	Arabidopsis thaliana	Unknown	Unclear	Genomic evidence:microarray data	0.1825	1.99112	4.20051	1.87402
Traes_3AL_714464A7D	AT5G57010.1	5e-57	Arabidopsis thaliana	Unknown	Unclear	Genomic evidence:microarray data	-0.406411	-2.836	-2.47262	-2.02308
Traes_3B_9D8A5B2F5	AT5G57010.1	E-137	Arabidopsis thaliana	Unknown	Unclear	Genomic evidence:microarray data	-0.152589	-2.67155	-2.03897	-1.35605
Traes_3AL_834004A48	AT5G57030.1	0	Arabidopsis thaliana	Unknown	Unclear	Molecular evidence:Blast search	0.00325703	-0.318649	-2.31039	-3.45728
Traes_3B_AF9400E7F	AT5G57030.1	E-121	Arabidopsis thaliana	Unknown	Unclear	Molecular evidence:Blast search	0.0881667	-0.347924	-2.61907	-3.518
Traes_3DL_BB8E47D75	AT5G57030.1	E-142	Arabidopsis thaliana	Unknown	Unclear	Molecular evidence:Blast search	-0.0284967	-0.36676	-2.57876	-4.35105
Traes_6AL_650753FBC	AT5G58070.1	6e-80	Arabidopsis thaliana	Unknown	Unclear	Genomic evidence:microarray data	-0.0691574	1.18981	0.620483	-0.396752
Traes_2AL_4B74163D6	AT5G58140.2	E-121	Arabidopsis thaliana	Unknown	Unclear	Genomic evidence:microarray data	-0.329868	-0.214629	-1.63707	-3.15622
Traes_2BL_A687959FB	AT5G58140.2	0	Arabidopsis thaliana	Unknown	Unclear	Genomic evidence:microarray data	-0.306233	-0.179983	-1.02089	-1.92291
Traes_2DL_965658B42	AT5G58140.2	0	Arabidopsis thaliana	Unknown	Unclear	Genomic evidence:microarray data	-0.261611	0.171538	-0.909474	-1.82815
Traes_5AL_4B1551434	AT5G58140.2	0	Arabidopsis thaliana	Unknown	Unclear	Genomic evidence:microarray data	-0.158668	0.010104	0.902742	0.934965
Traes_5BL_285E9627E	AT5G58140.2	0	Arabidopsis thaliana	Unknown	Unclear	Genomic evidence:microarray data	-0.26694	0.00818217	0.688875	1.17698
Traes_2AL_37DC69E9B	AT5G58140.4	E-109	Arabidopsis thaliana	Unknown	Unclear	Genomic evidence:microarray data	-0.235212	-0.258423	-1.35673	-2.57718
Traes_7AS_29FF84C97	AT5G58170.1	E-161	Arabidopsis thaliana	Unknown	Unclear	Genomic evidence:microarray data	0.467971	-0.448266	-0.834124	-1.10025
Traes_7BS_6EBE7C904	AT5G58170.1	E-157	Arabidopsis thaliana	Unknown	Unclear	Genomic evidence:microarray data	0.492203	-0.872436	-1.26769	-1.96924
Traes_1AS_F5A8841D2	AT5G59400.1	3e-69	Arabidopsis thaliana	Unknown	Unclear	Genomic evidence:microarray data	0.106391	1.18611	3.12642	4.4043
Traes_1BS_7949CB07A	AT5G59400.1	5e-74	Arabidopsis thaliana	Unknown	Unclear	Genomic evidence:microarray data	-0.0257112	0.847968	1.70641	3.08135
Traes_1DS_D49FED82C	AT5G59400.1	6e-66	Arabidopsis thaliana	Unknown	Unclear	Genomic evidence:microarray data	0.0665637	0.706955	2.22869	3.21691
Traes_1AL_6CDAB2400	AT5G61500.1	E-134	Arabidopsis thaliana	Unknown	Unclear	Genomic evidence:microarray data	0.246764	0.644994	1.21279	2.13205
Traes_1BL_07898F3B2	AT5G61500.1	E-134	Arabidopsis thaliana	Unknown	Unclear	Genomic evidence:microarray data	0.105397	0.409896	1.33853	2.53601
Traes_1DL_291C515F3	AT5G61500.1	E-134	Arabidopsis thaliana	Unknown	Unclear	Genomic evidence:microarray data	-0.177935	0.15124	0.656378	1.52503
Traes_6DL_D47B05368	AT5G61670.1	E-126	Arabidopsis thaliana	Unknown	Unclear	Molecular evidence:Blast search	0.0713144	0.646395	0.291799	-0.431393
Traes_7AS_C87C2FF27	AT5G61820.1	E-116	Arabidopsis thaliana	Unknown	Unclear	Genomic evidence:microarray data	0.714782	0.129921	-0.910184	-0.0770781
Traes_4AL_1D4A5919A1	AT5G62680.1	E-138	Arabidopsis thaliana	Unknown	Unclear	Genomic evidence:microarray data	0.147681	-0.335095	0.767396	2.76108
Traes_4DS_8D5B431C7	AT5G62680.1	E-172	Arabidopsis thaliana	Unknown	Unclear	Genomic evidence:microarray data	-0.0252354	-1.51783	-0.235279	1.12658
Traes_5DS_D92348F2E	AT5G62680.1	E-170	Arabidopsis thaliana	Unknown	Unclear	Genomic evidence:microarray data	1.25383	0.382186	0.877435	3.21381
Traes_1BL_6D953AB6D	AT5G62740.1	E-135	Arabidopsis thaliana	Unknown	Unclear	Genomic evidence:microarray data	1.59448	1.57452	-1.05974	-1.76243
Traes_1DL_87F982556	AT5G62740.1	E-135	Arabidopsis thaliana	Unknown	Unclear	Genomic evidence:microarray data	1.62882	1.79681	-0.876024	-3.16374
Traes_4BL_4DB9F4DFF	AT5G62740.1	E-138	Arabidopsis thaliana	Unknown	Unclear	Genomic evidence:microarray data	0.334859	0.856639	0.861113	1.47682
Traes_4DL_9D6BFA388	AT5G62740.1	1e-96	Arabidopsis thaliana	Unknown	Unclear	Genomic evidence:microarray data	0.373105	0.89437	1.72106	1.98861
Traes_5AL_C0A407A93	AT5G62740.1	E-140	Arabidopsis thaliana	Unknown	Unclear	Genomic evidence:microarray data	0.305954	0.571551	-0.946349	-1.93095
Traes_5BL_51C846D76	AT5G62740.1	E-118	Arabidopsis thaliana	Unknown	Unclear	Genomic evidence:microarray data	0.729251	0.929947	-0.487719	-1.38714
Traes_5BL_B13FC8690	AT5G62740.1	3e-78	Arabidopsis thaliana	Unknown	Unclear	Genomic evidence:microarray data	0.397787	0.603948	-1.03127	-1.8064
Traes_5BL_E5DAD6335	AT5G62740.1	3e-74	Arabidopsis thaliana	Unknown	Unclear	Genomic evidence:microarray data	0.330095	0.650738	-0.851656	-1.96706
Traes_5DL_017B20CCA	AT5G62740.1	E-140	Arabidopsis thaliana	Unknown	Unclear	Genomic evidence:microarray data	0.412837	0.643169	-0.749737	-1.9545
Traes_5DL_91A580EC6	AT5G62740.1	E-138	Arabidopsis thaliana	Unknown	Unclear	Genomic evidence:microarray data	0.480711	1.37993	-0.555817	-2.98491
Traes_5DL_BFB4552D3	AT5G63120.2	8e-65	Arabidopsis thaliana	Unknown	Unclear	Genomic evidence:microarray data	0.169424	0.150776	-1.16432	-1.40012
Traes_2BL_B09F6D195	AT5G63190.1	0	Arabidopsis thaliana	Unknown	Unclear	Genomic evidence:microarray data	0.174318	0.0288439	1.03101	-0.38853
Novel05434	AT5G63930.1	E-123	Arabidopsis thaliana	Unknown	Unclear	Genomic evidence:microarray data	0.713391	-0.302078	0.538908	2.38253
Novel10489	AT5G63930.1	E-122	Arabidopsis thaliana	Unknown	Unclear	Genomic evidence:microarray data	1.50676	-0.246417	0.510874	2.36506
Novel11837	AT5G63930.1	E-122	Arabidopsis thaliana	Unknown	Unclear	Genomic evidence:microarray data	0.146111	-1.22494	-0.35701	1.48022
Traes_1AL_A270BED6E	AT5G63930.1	5e-59	Arabidopsis thaliana	Unknown	Unclear	Genomic evidence:microarray data	0.311151	-1.39089	-0.421436	0.373823
Traes_1BS_024A580FB	AT5G63930.1	E-180	Arabidopsis thaliana	Unknown	Unclear	Genomic evidence:microarray data	0.755818	-1.45375	-1.02419	-1.36566
Traes_1BS_D9B54E5CF	AT5G63930.1	E-137	Arabidopsis thaliana	Unknown	Unclear	Genomic evidence:microarray data	1.02987	-1.01395	-0.930798	-1.08172
Traes_1DS_70BE14BCA	AT5G63930.1	E-131	Arabidopsis thaliana	Unknown	Unclear	Genomic evidence:microarray data	0.653202	-1.00056	-1.40286	-2.85214
Traes_4AL_CC989B4A5	AT5G63930.1	E-128	Arabidopsis thaliana	Unknown	Unclear	Genomic evidence:microarray data	0.685968	-0.222738	-0.356376	-1.82646
Traes_5AL_0002B669C	AT5G64370.1	E-133	Arabidopsis thaliana	Unknown	Unclear	Genomic evidence:microarray data	-0.211093	0.0100423	0.694477	2.23585
Traes_5BL_AA36BC1E0	AT5G64370.1	0	Arabidopsis thaliana	Unknown	Unclear	Genomic evidence:microarray data	0.00747093	0.221546	0.927836	2.15227
Traes_5DL_964A2C94E	AT5G64370.1	0	Arabidopsis thaliana	Unknown	Unclear	Genomic evidence:microarray data	-0.0927224	0.0327453	1.10803	2.54134
Traes_3AL_392D17B3C	AT5G64380.1	4e-60	Arabidopsis thaliana	Unknown	Unclear	Genomic evidence:microarray data	-0.514393	0.0375723	-1.19127	-2.81728
Traes_3DL_95A884767	AT5G64380.1	2e-56	Arabidopsis thaliana	Unknown	Unclear	Genomic evidence:microarray data	-0.509741	-0.0644819	-0.968208	-2.91616
Traes_4AS_91D4C5213	AT5G64380.1	1e-71	Arabidopsis thaliana	Unknown	Unclear	Genomic evidence:microarray data	-0.196847	-0.217875	-0.574524	-1.57049
Traes_4DL_2A7895E16	AT5G64380.1	6e-70	Arabidopsis thaliana	Unknown	Unclear	Genomic evidence:microarray data	-0.187937	-0.317383	-0.374098	-1.53263
Traes_2AL_2325B74B1	AT5G64550.1	0	Arabidopsis thaliana	Unknown	Unclear	Genomic evidence:microarray data	0.201215	1.80309	2.09909	3.02393
Traes_2AL_5E2E7E600	AT5G64550.1	E-165	Arabidopsis thaliana	Unknown	Unclear	Genomic evidence:microarray data	0.160669	1.60314	2.85689	1.76474
Traes_2BL_C0EE780E01	AT5G64550.1	E-165	Arabidopsis thaliana	Unknown	Unclear	Genomic evidence:microarray data	-0.0395476	1.46276	3.95401	3.66451
Traes_2BL_F9F0350F3	AT5G64550.1	0	Arabidopsis thaliana	Unknown	Unclear	Genomic evidence:microarray data	0.188153	1.71835	1.9748	2.6891
Traes_2DL_4BB0ADC221	AT5G64550.1	0	Arabidopsis thaliana	Unknown	Unclear	Genomic evidence:microarray data	0.0796973	1.73786	2.51379	3.47084
Traes_2DL_BD7C8DE17	AT5G64550.1	E-168	Arabidopsis thaliana	Unknown	Unclear	Genomic evidence:microarray data	-0.241649	2.02577	4.31696	4.66246
Traes_3AL_DE11898C1	AT5G64550.1	E-102	Arabidopsis thaliana	Unknown	Unclear	Genomic evidence:microarray data	0.246891	1.43628	2.2503	2.20239
Traes_3B_AC28283D9	AT5G64550.1	E-143	Arabidopsis thaliana	Unknown	Unclear	Genomic evidence:microarray data	0.200034	1.21794	2.53541	2.29086
Traes_3DL_D3D898EF0	AT5G64550.1	E-104	Arabidopsis thaliana	Unknown	Unclear	Genomic evidence:microarray data	0.32612	1.3642	2.33981	2.11163
Traes_6DL_3A44079B9	AT5G64550.1	E-106	Arabidopsis thaliana	Unknown	Unclear	Genomic evidence:microarray data	-0.135008	0.210409	-0.214651	2.78139
Traes_2AS_665AF9500	AT5G64740.1	0	Arabidopsis thaliana	Unknown	Unclear	Genomic evidence:microarray data	0.0727811	0.316424	0.440255	1.27028
Traes_6AS_CF6D8CD28	AT5G64740.1	0	Arabidopsis thaliana	Unknown	Unclear	Genomic evidence:microarray data	0.118106	-0.904441	-0.820832	-0.169665
Traes_7AS_85178E0D7	AT5G65380.1	2e-83	Arabidopsis thaliana	Unknown	Unclear	Genomic evidence:microarray data	1.43263	1.98472	2.69101	2.72859
Traes_2AL_3D221F120	AY225150.1	0	Medicago truncatula	Glutamine-synthetase	Unclear	Molecular evidence: cDNA-AFLP and RT-PCR	-0.273703	-0.985732	-1.63611	-2.81037
Traes_2BL_342BDEA35	AY225150.1	0	Medicago truncatula	Glutamine-synthetase	Unclear	Molecular evidence: cDNA-AFLP and RT-PCR	-0.244998	-0.969423	-1.47693	-2.77194
Traes_2DL_62DA30872	AY225150.1	1e-62	Medicago truncatula	Glutamine-synthetase	Unclear	Molecular evidence: cDNA-AFLP and RT-PCR	-0.358236	-1.08026	-1.9916	-3.11608
Traes_2DL_B574C3BD1	AY225150.1	1e-87	Medicago truncatula	Glutamine-synthetase	Unclear	Molecular evidence: cDNA-AFLP and RT-PCR	-0.300567	-1.03326	-2.08698	-3.09886
Traes_2BL_3F2E8556E	AY687391.1	E-171	Glycine max	Unknown	Promote	Genetic evidence:Transgene	-0.563369	-1.96126	-2.25786	-2.56838
Traes_5AL_922FDD124	AY687391.1	0	Glycine max	Unknown	Promote	Genetic evidence:Transgene	0.122697	-1.13723	-1.24041	-2.74863
Traes_5BL_F167D5635	AY687391.1	0	Glycine max	Unknown	Promote	Genetic evidence:Transgene	0.133876	-1.67117	-1.93122	-2.56816
Traes_4AL_2FB8419FC	DQ154009.1	0	Glycine max	Unknown	Unclear	Molecular evidence	0.111651	1.15113	2.68374	3.56399
Traes_4BL_4447E55C5	DQ154009.1	3e-72	Glycine max	Unknown	Unclear	Molecular evidence	0.233667	1.27082	2.78949	3.2033
Traes_4BL_BB866FD7D	DQ154009.1	2e-56	Glycine max	Unknown	Unclear	Molecular evidence	0.432332	1.34384	2.8502	3.15322
Traes_4DL_C36F5A266	DQ154009.1	0	Glycine max	Unknown	Unclear	Molecular evidence	0.442501	1.0107	2.52742	3.04604
Traes_4BS_A772DDBD7	DQ418880.1	8e-71	Glycine max	Unknown	Unclear	Molecular evidence:Real-Time PCR	0.819929	0.98242	2.49952	3.24334
Traes_1AL_51CED3DBF	GRMZM2G025190_T01	0	Zea mays	MISC.glutathione S transferases	Unclear	Genomic evidence:microarray data	-0.638903	1.2653	1.33575	2.55703
Traes_4AS_B978C93FA	GRMZM2G025190_T01	0	Zea mays	MISC.glutathione S transferases	Unclear	Genomic evidence:microarray data	-1.3422	1.77291	1.61524	1.62333
Traes_4DL_FFD4866F3	GRMZM2G025190_T01	0	Zea mays	MISC.glutathione S transferases	Unclear	Genomic evidence:microarray data	-1.31987	1.69589	1.52455	1.91512
Traes_7DS_40ABAB54D	GRMZM2G025190_T01	E-117	Zea mays	MISC.glutathione S transferases	Unclear	Genomic evidence:microarray data	1.12766	0.209844	-1.67988	-3.11439
Traes_4BS_AF7E1097C	GRMZM2G047456_T04	0	Zea mays	MISC.peroxidases	Unclear	Genomic evidence:microarray data	-0.0914394	-0.269364	-1.90638	-1.85102
Traes_4DS_A0680809B	GRMZM2G047456_T04	0	Zea mays	MISC.peroxidases	Unclear	Genomic evidence:microarray data	-0.355168	-0.748161	-2.89684	-3.50079
Traes_7BL_4CFC83015	GRMZM2G055107_T01	0	Zea mays	Unknown	Unclear	Genomic evidence:microarray data	1.04222	1.50908	2.87514	3.01475
Traes_7DS_CDF069696	GRMZM2G055107_T01	0	Zea mays	Unknown	Unclear	Genomic evidence:microarray data	1.62517	1.67576	3.46958	3.76394
Traes_4AS_D2A85E4CA	GRMZM2G055107_T02	0	Zea mays	Unknown	Unclear	Genomic evidence:microarray data	0.072727	-1.58666	0.931482	3.03765
Traes_4DL_CF7C86CD1	GRMZM2G055107_T02	0	Zea mays	Unknown	Unclear	Genomic evidence:microarray data	-0.599411	-0.675359	-0.117486	2.10268
Traes_7DL_9A250ACB9	GRMZM2G055107_T02	E-180	Zea mays	Unknown	Unclear	Genomic evidence:microarray data	0.743722	-0.180548	-0.877556	-1.97151
Traes_6AS_D7CD3162B	GRMZM2G076537_T01	E-108	Zea mays	Unknown	Unclear	Genomic evidence:microarray data	0.483758	-0.951362	-1.35262	-1.78857
Traes_6DS_7B1B7058B	GRMZM2G076537_T01	1e-54	Zea mays	Unknown	Unclear	Genomic evidence:microarray data	0.751687	0.503446	1.7695	0.681706
Traes_7DL_69E2EA435	GRMZM2G076537_T04	E-132	Zea mays	Unknown	Unclear	Genomic evidence:microarray data	0.0663294	1.57238	4.04017	4.50839
Traes_7DL_EBEF5B3FC	GRMZM2G076537_T04	0	Zea mays	Unknown	Unclear	Genomic evidence:microarray data	-0.368599	1.2764	3.83497	4.2185
Novel05321	GRMZM2G076537_T05	E-160	Zea mays	Unknown	Unclear	Genomic evidence:microarray data	0.118612	-1.11327	-1.43213	-2.00663
Novel11542	GRMZM2G076537_T05	E-100	Zea mays	Unknown	Unclear	Genomic evidence:microarray data	1.12597	-0.0372247	-1.93753	-2.43729
Traes_6DL_FA4DA04E8	GRMZM2G076537_T05	E-128	Zea mays	Unknown	Unclear	Genomic evidence:microarray data	0.886941	-0.644435	-0.698262	-0.450663
Traes_4AS_E0E7CDA7E	GRMZM2G125032_T01	5e-68	Zea mays	MISC.beta 1,3 glucan hydrolases	Unclear	Genomic evidence:microarray data	0.498538	-0.057323	2.00904	2.81034
Traes_4BL_7020BBFC9	GRMZM2G125032_T01	E-111	Zea mays	MISC.beta 1,3 glucan hydrolases	Unclear	Genomic evidence:microarray data	0.412423	0.0275883	2.1175	3.1144
Traes_4DL_37F296D40	GRMZM2G125032_T01	3e-70	Zea mays	MISC.beta 1,3 glucan hydrolases	Unclear	Genomic evidence:microarray data	-0.213426	-0.130683	1.8783	2.84697
Traes_5DL_96F9EED93	GRMZM2G168365_T03	1e-76	Zea mays	Development.unspecified	Unclear	Genomic evidence:microarray data	0.382894	0.802755	1.29029	2.56454
Traes_2AS_DEDC612AE	GRMZM2G170013_T01	6e-52	Zea mays	MISC.short chain dehydrogenase/reductase (SDR)	Unclear	Genomic evidence:microarray data	-0.281443	0.620682	1.56226	2.55126
Traes_2BS_CB79BAFB1	GRMZM2G170013_T01	E-110	Zea mays	MISC.short chain dehydrogenase/reductase (SDR)	Unclear	Genomic evidence:microarray data	-0.578748	0.25254	1.19014	1.76241
Traes_6AS_E1707A5FA	GRMZM2G312877_T01	0	Zea mays	Biodegradation of Xenobiotics.lactoylglutathione lyase	Unclear	Genomic evidence:microarray data	-0.256831	1.06489	2.77723	4.71267
Traes_6DS_972C7F490	GRMZM2G312877_T01	0	Zea mays	Biodegradation of Xenobiotics.lactoylglutathione lyase	Unclear	Genomic evidence:microarray data	-0.0902377	1.06881	2.92337	4.70795
Traes_2AL_57BF37A86	GRMZM2G349749_T01	E-115	Zea mays	Development.storage proteins	Unclear	Genomic evidence:microarray data	0.699416	0.737977	4.1972	5.33699
Traes_1DS_1571BA3C8	GSMUA_Achr10T00320_001	E-142	Musa acuminata	MISC	Unclear	Molecular evidence:RNA sequencing	0.122147	0.198921	0.754606	-0.545907
Traes_1AS_83385074B	GSMUA_Achr10T18340_001	0	Musa acuminata	Unknown	Unclear	Molecular evidence:RNA sequencing	0.302634	0.0833551	0.693637	1.64978
Traes_1DS_6B5065463	GSMUA_Achr10T18340_001	0	Musa acuminata	Unknown	Unclear	Molecular evidence:RNA sequencing	-0.0473371	-0.31342	-0.0478595	1.02233
Traes_2BL_2E91C4DCF	GSMUA_Achr11T19570_001	2e-55	Musa acuminata	MISC	Unclear	Molecular evidence:RNA sequencing	0.0480339	0.432932	2.28236	1.4844
Traes_3B_AE0A8F5D4	GSMUA_Achr11T19570_001	5e-92	Musa acuminata	MISC	Unclear	Molecular evidence:RNA sequencing	-0.0530009	0.491526	3.38569	-0.4282
Traes_3DL_F36D3B968	GSMUA_Achr11T19570_001	3e-60	Musa acuminata	MISC	Unclear	Molecular evidence:RNA sequencing	-0.910134	-0.0826269	3.79583	0.918423
Traes_5AS_D42C83AB8	GSMUA_Achr11T19570_001	0	Musa acuminata	MISC	Unclear	Molecular evidence:RNA sequencing	-0.228395	-1.1878	2.08408	1.03422
Traes_5BL_619A5623A	GSMUA_Achr11T19570_001	0	Musa acuminata	MISC	Unclear	Molecular evidence:RNA sequencing	0.605105	-0.279442	1.03146	-0.130346
Traes_5BS_5C71656C2	GSMUA_Achr11T19570_001	0	Musa acuminata	MISC	Unclear	Molecular evidence:RNA sequencing	-0.169993	-0.265383	2.35971	1.03455
Traes_5DL_68DF8DF53	GSMUA_Achr11T19570_001	0	Musa acuminata	MISC	Unclear	Molecular evidence:RNA sequencing	0.724913	-0.804317	1.54197	0.576372
Traes_5DS_72806EF00	GSMUA_Achr11T19570_001	0	Musa acuminata	MISC	Unclear	Molecular evidence:RNA sequencing	0.40646	0.402696	-0.939937	-2.46234
Traes_5DS_FDD00EE4A	GSMUA_Achr11T19570_001	0	Musa acuminata	MISC	Unclear	Molecular evidence:RNA sequencing	-0.241117	-1.16873	2.15774	0.384973
Traes_3B_F4D3D054A	GSMUA_Achr11T19620_001	2e-68	Musa acuminata	Unknown	Unclear	Molecular evidence:RNA sequencing	0.0519024	0.752657	0.847829	-0.442708
Traes_4AL_4CF8C4AD2	GSMUA_Achr11T21950_001	2e-98	Musa acuminata	Unknown	Unclear	Molecular evidence:RNA sequencing	0.0996344	-0.00667674	-0.381431	-1.31081
Traes_6BL_65F472130	GSMUA_Achr1T00250_001	1e-97	Musa acuminata	MISC	Unclear	Molecular evidence:RNA sequencing	0.0242392	0.529416	-0.142321	-0.55404
Traes_3AL_2B1F45813	GSMUA_Achr1T13330_001	E-105	Musa acuminata	Unknown	Unclear	Molecular evidence:RNA sequencing	0.596647	-0.100401	1.70002	3.59393
Traes_3B_2F5720343	GSMUA_Achr1T13330_001	E-125	Musa acuminata	Unknown	Unclear	Molecular evidence:RNA sequencing	0.583569	1.7976	2.43126	3.12305
Traes_6AL_54260E477	GSMUA_Achr1T16300_001	E-121	Musa acuminata	MISC	Unclear	Molecular evidence:RNA sequencing	0.142002	-0.0830822	-0.828562	-1.65465
Traes_6AS_4C413AC53	GSMUA_Achr3T05440_001	1e-82	Musa acuminata	Unknown	Unclear	Molecular evidence:RNA sequencing	0.0759517	-0.425467	-1.39887	-0.524909
Traes_1AL_B4CB8A79C	GSMUA_Achr3T16530_001	0	Musa acuminata	Transferase activity	Unclear	Molecular evidence:RNA sequencing	0.0951164	-0.6077	0.521525	5.8828
Traes_1BL_5796ED3B1	GSMUA_Achr3T16530_001	0	Musa acuminata	Transferase activity	Unclear	Molecular evidence:RNA sequencing	-0.233757	-0.522585	-0.554022	5.35756
Traes_3AL_8D9C1AECB	GSMUA_Achr3T16530_001	E-122	Musa acuminata	Transferase activity	Unclear	Molecular evidence:RNA sequencing	0.196657	-0.34156	0.616521	4.43
Traes_3DL_2A42BF99B	GSMUA_Achr3T16530_001	0	Musa acuminata	MISC	Unclear	Molecular evidence:RNA sequencing	-0.292117	-1.17721	-0.383768	2.43183
Traes_5DL_101EA7D86	GSMUA_Achr3T28070_001	E-128	Musa acuminata	Unknown	Unclear	Molecular evidence:RNA sequencing	0.354209	0.935664	1.16759	1.67922
Traes_6AL_D13D9D951	GSMUA_Achr4T29870_001	0	Musa acuminata	Unknown	Unclear	Molecular evidence:RNA sequencing	0.0598149	-1.56226	-1.99616	-2.65168
Traes_6DL_0190C4818	GSMUA_Achr4T29870_001	E-173	Musa acuminata	Unknown	Unclear	Molecular evidence:RNA sequencing	0.018783	-1.45017	-2.07501	-2.39551
Traes_1DL_6D040C278	GSMUA_Achr4T32050_001	2e-94	Musa acuminata	Unknown	Unclear	Molecular evidence:RNA sequencing	0.270409	1.11083	1.69388	1.83858
Traes_3B_BAADA9778	GSMUA_Achr5T01360_001	6e-49	Musa acuminata	Protein binding	Unclear	Molecular evidence:RNA sequencing	-0.39693	-1.09841	2.0102	4.56659
Traes_3B_6AF2507DB	GSMUA_Achr5T12000_001	9e-41	Musa acuminata	Fiber protein	Unclear	Molecular evidence:RNA sequencing	-0.940161	0.487036	2.53776	3.42826
Traes_5DL_51681402F	GSMUA_Achr5T13210_001	1e-82	Musa acuminata	Unknown	Unclear	Molecular evidence:RNA sequencing	-0.939588	-0.0149164	-0.262	1.13206
Traes_5BL_B18888794	GSMUA_Achr5T21410_001	4e-76	Musa acuminata	Unknown	Unclear	Molecular evidence:RNA sequencing	1.18182	1.93179	4.16624	6.91874
Traes_3B_9F0CAA807	GSMUA_Achr5T26440_001	9e-99	Musa acuminata	Unknown	Unclear	Molecular evidence:RNA sequencing	-0.0964861	1.10197	1.68457	3.37883
Traes_3B_C6E0AA89E	GSMUA_Achr5T26440_001	1e-78	Musa acuminata	Unknown	Unclear	Molecular evidence:RNA sequencing	0.15412	0.818981	1.42709	3.41319
Traes_1AL_7EAFBE83A	GSMUA_Achr5T26970_001	0	Musa acuminata	Oxidation-reduction process	Unclear	Molecular evidence:RNA sequencing	0.389236	-1.85978	1.88408	-0.632506
Novel04975	GSMUA_Achr5T27120_001	9e-68	Musa acuminata	Unknown	Unclear	Molecular evidence:RNA sequencing	0.307314	-0.229479	-1.33236	-0.847307
Traes_2AL_070A611F6	GSMUA_Achr5T27120_001	0	Musa acuminata	Unknown	Unclear	Molecular evidence:RNA sequencing	0.14903	1.09481	1.27152	1.87047
Traes_2BL_F79009979	GSMUA_Achr5T27120_001	0	Musa acuminata	Unknown	Unclear	Molecular evidence:RNA sequencing	0.113158	1.13849	1.17914	1.99655
Traes_2DL_64803388A	GSMUA_Achr5T27120_001	0	Musa acuminata	Unknown	Unclear	Molecular evidence:RNA sequencing	0.158336	1.11182	1.42484	2.28802
Traes_3AL_945AEAD5B	GSMUA_Achr5T27120_001	E-156	Musa acuminata	Unknown	Unclear	Molecular evidence:RNA sequencing	0.448729	-0.330993	-1.53945	-1.24585
Traes_3B_3B3224CD0	GSMUA_Achr5T27120_001	E-15	Musa acuminata	Unknown	Unclear	Molecular evidence:RNA sequencing	0.16334	-0.392452	-1.31622	-1.01747
Traes_3DL_41E353D06	GSMUA_Achr5T27120_001	6e-83	Musa acuminata	Unknown	Unclear	Molecular evidence:RNA sequencing	0.201161	-0.28314	-1.28241	-0.985866
Traes_1BL_22C91FBBA	GSMUA_Achr6T09580_001	4e-49	Musa acuminata	Transferase activity	Unclear	Molecular evidence:RNA sequencing	0.918921	-0.153727	2.12608	2.7441
Traes_2AL_2394F534B	GSMUA_Achr6T19880_001	E-171	Musa acuminata	MISC	Unclear	Molecular evidence:RNA sequencing	-1.28583	0.16216	1.38809	3.02137
Traes_2AL_C51BB91CC	GSMUA_Achr6T19880_001	E-173	Musa acuminata	MISC	Unclear	Molecular evidence:RNA sequencing	-0.318589	-0.343492	-1.27232	-1.78428
Traes_2BL_6A38C0C23	GSMUA_Achr6T19880_001	E-171	Musa acuminata	MISC	Unclear	Molecular evidence:RNA sequencing	-0.301252	1.00911	1.87974	2.56447
Traes_2BL_FB766A312	GSMUA_Achr6T19880_001	E-104	Musa acuminata	MISC	Unclear	Molecular evidence:RNA sequencing	-0.461899	-0.534551	-1.73784	-2.67168
Traes_2DL_EB6342C6E	GSMUA_Achr6T19880_001	1e-47	Musa acuminata	MISC	Unclear	Molecular evidence:RNA sequencing	-0.321775	-0.281428	-1.4641	-2.04618
Traes_5AL_E4C37F0BC	GSMUA_Achr6T19880_001	3e-67	Musa acuminata	MISC	Unclear	Molecular evidence:RNA sequencing	-0.203617	-0.323152	-1.20365	-2.34142
Traes_5BL_D70B77649	GSMUA_Achr6T19880_001	E-170	Musa acuminata	MISC	Unclear	Molecular evidence:RNA sequencing	-0.192346	-0.163406	-0.90834	-1.93672
Traes_5DL_EED5188AC	GSMUA_Achr6T19880_001	E-171	Musa acuminata	MISC	Unclear	Molecular evidence:RNA sequencing	-0.167981	-0.175385	-0.689428	-1.66635
Traes_2BS_A9BF5F962	GSMUA_Achr7T26370_001	0	Musa acuminata	Unknown	Unclear	Molecular evidence:RNA sequencing	-0.320868	-0.186754	2.47428	3.31222
Traes_3B_95F335BEE	GSMUA_Achr7T26370_001	E-161	Musa acuminata	Unknown	Unclear	Molecular evidence:RNA sequencing	-0.216916	1.62665	3.38117	5.83913
Traes_1BL_56BBB4B2F	GSMUA_Achr8T16150_001	0	Musa acuminata	ATP binding	Unclear	Molecular evidence:RNA sequencing	0.207219	0.98593	2.21243	1.88168
Traes_1DL_9926BBAE1	GSMUA_Achr8T16150_001	0	Musa acuminata	ATP binding	Unclear	Molecular evidence:RNA sequencing	0.180446	0.724666	1.8123	1.10678
Traes_5AL_8E706641D	GSMUA_Achr8T16150_001	0	Musa acuminata	ATP binding	Unclear	Molecular evidence:RNA sequencing	-0.291799	0.231394	-1.35597	-1.38497
Traes_5DL_95E144096	GSMUA_Achr8T16150_001	0	Musa acuminata	ATP binding	Unclear	Molecular evidence:RNA sequencing	-0.131257	0.483391	-0.630493	-1.0685
Traes_5AL_F8C3B03A5	GSMUA_Achr9T15500_001	2e-93	Musa acuminata	Unknown	Unclear	Molecular evidence:RNA sequencing	1.5084	0.342236	8.43931	5.94601
Traes_5BL_9C059D15D	GSMUA_Achr9T15500_001	2e-82	Musa acuminata	Unknown	Unclear	Molecular evidence:RNA sequencing	-0.684395	-0.0641201	7.99852	5.75
Traes_5DL_05B334BC0	GSMUA_Achr9T15500_001	2e-95	Musa acuminata	Unknown	Unclear	Molecular evidence:RNA sequencing	0.210171	0.431389	7.34745	5.00004
Traes_1DL_DB75BFD8A	GSMUA_Achr9T24800_001	E-111	Musa acuminata	Protein binding	Unclear	Molecular evidence:RNA sequencing	-0.158033	-0.0143512	1.18959	1.15324
Traes_3AL_B27F0D4FF	GSMUA_Achr9T24800_001	0	Musa acuminata	Unknown	Unclear	Molecular evidence:RNA sequencing	-0.138743	0.350501	0.618141	1.76319
Traes_3DL_E400E521A	GSMUA_Achr9T24800_001	E-180	Musa acuminata	Protein binding	Unclear	Molecular evidence:RNA sequencing	-0.0630513	0.402641	1.15702	2.42985
Traes_1AL_C4A651390	GSMUA_Achr9T24800_001	E-113	Musa acuminata	Protein binding	Unclear	Molecular evidence:RNA sequencing	-0.000962517	-0.089238	1.24444	1.21558
Traes_1AS_777D95C94	GSMUA_Achr9T25490_001	0	Musa acuminata	Unknown	Unclear	Molecular evidence:RNA sequencing	0.0262725	0.579839	3.93325	2.3028
Traes_1BS_23156BD3C	GSMUA_Achr9T25490_001	0	Musa acuminata	Unknown	Unclear	Molecular evidence:RNA sequencing	-0.0147638	0.660456	3.48261	2.12261
Traes_1DS_6F2879364	GSMUA_Achr9T25490_001	0	Musa acuminata	Unknown	Unclear	Molecular evidence:RNA sequencing	-0.0993196	0.614906	3.64645	1.54365
Traes_5AL_E41B5D520	LOC_Os09g19890.1	0	Oryza sativa	Unknown	Unclear	Molecular evidence:SSH	0.177545	0.144611	1.70718	2.8946
Traes_5BL_CE5FD1D0A	LOC_Os09g19890.1	0	Oryza sativa	Unknown	Unclear	Molecular evidence:SSH	0.0616209	0.162501	1.39758	2.3072
Traes_5DL_D75A4AB54	LOC_Os09g19890.1	0	Oryza sativa	Unknown	Unclear	Molecular evidence:SSH	0.120573	-0.281071	1.26623	2.06657
Traes_4DS_AFAF2A29E	LOC_Os11g43900.1	3e-84	Oryza sativa	Unknown	Unclear	Molecular evidence: SSH/Northern blot/RT-PCR	0.0446773	-0.197375	0.762005	0.366205
Traes_5BL_6D66F8604	NM_001111815.1	E-117	Zea mays	Unknown	Unclear	Genomic evidence	0.183275	-0.260072	-1.06673	-0.696958
Traes_5DL_C5A01ADE3	NM_001111815.1	E-108	Zea mays	Unknown	Unclear	Genomic evidence	0.251156	-0.787553	-1.25475	-0.626589
Substance metabolism
Traes_5AS_7158B51F3	A21360.1	E-105	Tomato (Lycopersicon esculentum)	Chlorophyll degradation	Promote	Molecular evidence:cDNA library	-0.23783	-0.482208	-0.951931	-2.87276
Traes_6AL_2017727C4	AB037595.1	E-151	Oryza sativa	Protein degradation/modification:Cytosolic glutamine synthetase	Delay	Genetic evidence:Mutant	0.398446	0.428901	-0.274024	0.864131
Traes_6BL_95C7F7123	AB037595.1	E-173	Oryza sativa	Protein degradation/modification:Cytosolic glutamine synthetase	Delay	Genetic evidence:Mutant	0.418983	0.28884	-0.394081	2.0102
Traes_6DL_24A8AB125	AB037595.1	0	Oryza sativa	Protein degradation/modification:Cytosolic glutamine synthetase	Delay	Genetic evidence:Mutant	0.429404	0.103059	-0.645982	1.36065
Traes_3DL_3FDB734ED	AF022716.1	0	Solanum tuberosum	Lipid/Carbohydrate metabolism	Delay	Genetic evidence:Transgene	0.535056	0.510968	1.97119	0.144391
Novel08455	AK066734.1	1e-40	Oryza sativa	Protein degradation/modification	Unclear	Molecular evidence:Northern	-0.473515	-3.01878	-4.13232	-8.16412
Traes_3AS_21041A74C	AK066734.1	5e-58	Oryza sativa	Protein degradation/modification	Unclear	Molecular evidence:Northern	-0.204624	-0.570688	-1.62185	-3.29142
Traes_3DS_08CEC0C15	AK066734.1	1e-46	Oryza sativa	Protein degradation/modification	Unclear	Molecular evidence:Northern	-0.329436	-0.675989	-1.88602	-3.64654
Traes_5BL_BEE0B65AC	AK066734.1	E-100	Oryza sativa	Protein degradation/modification	Unclear	Molecular evidence:Northern	-0.60896	-3.01604	-4.37281	-5.284
Traes_4AS_1CDA71553	AK243037.1	0	Oryza sativa	Protein degradation/modification	Unclear	Molecular evidence:Northern	-0.416019	0.596619	0.268346	2.6301
Traes_4BL_52F044A40	AK243037.1	0	Oryza sativa	Protein degradation/modification	Unclear	Molecular evidence:Northern	-0.190417	0.805918	0.0829341	1.3967
Traes_4DL_CB8E1061C	AK243037.1	0	Oryza sativa	Protein degradation/modification	Unclear	Molecular evidence:Northern	-0.178115	0.927143	0.0785532	1.18967
Traes_1DL_9F02FFABA	AT1G02850.2	E-72	Arabidopsis thaliana	Lipid/Carbohydrate metabolism	Unclear	Genomic evidence:microarray data	0.237889	1.27226	6.35599	8.12844
Traes_3AL_6B2120DEC	AT1G02850.2	E-155	Arabidopsis thaliana	Lipid/Carbohydrate metabolism	Unclear	Genomic evidence:microarray data	-0.809646	-1.60261	-4.34067	-6.99176
Traes_3B_80B2632B4	AT1G02850.2	E-155	Arabidopsis thaliana	Lipid/Carbohydrate metabolism	Unclear	Genomic evidence:microarray data	-0.485967	-1.11211	-2.70698	-5.23933
Traes_3DL_1EBA52CC3	AT1G02850.2	E-145	Arabidopsis thaliana	Lipid/Carbohydrate metabolism	Unclear	Genomic evidence:microarray data	-0.379572	-1.17685	-3.03009	-6.39007
Traes_3DL_714316B91	AT1G02850.2	E-154	Arabidopsis thaliana	Lipid/Carbohydrate metabolism	Unclear	Genomic evidence:microarray data	0.354311	0.751954	-0.445656	-1.41295
Traes_5AL_133FEF770	AT1G02850.2	E-140	Arabidopsis thaliana	Lipid/Carbohydrate metabolism	Unclear	Genomic evidence:microarray data	1.09336	2.09732	4.01445	2.93777
Traes_5DL_5DAC58E1F	AT1G02850.2	E-150	Arabidopsis thaliana	Lipid/Carbohydrate metabolism	Unclear	Genomic evidence:microarray data	0.307857	0.455486	0.0632476	-1.60965
Traes_5BL_1534784E6	AT1G05000.1	1e-74	Arabidopsis thaliana	Protein degradation/modification	Unclear	Genomic evidence:microarray data	0.354954	0.430414	2.75633	1.36768
Traes_7AS_EA2CCE18A	AT1G05000.1	2e-68	Arabidopsis thaliana	Protein degradation/modification	Unclear	Genomic evidence:microarray data	-0.157487	-0.292665	2.53582	1.30632
Traes_7BS_27D0E28C7	AT1G05000.1	1e-69	Arabidopsis thaliana	Protein degradation/modification	Unclear	Genomic evidence:microarray data	-0.120218	-0.433656	2.29187	0.727437
Traes_7DS_1E2B77E33	AT1G05000.1	4e-57	Arabidopsis thaliana	Protein degradation/modification	Unclear	Genomic evidence:microarray data	-0.139374	-0.42083	1.88078	0.766848
Traes_4AL_51F69C27C	AT1G07230.1	0	Arabidopsis thaliana	Lipid/Carbohydrate metabolism	Unclear	Genomic evidence:microarray data	-0.0836686	-0.0288856	0.922666	0.677727
Traes_5BL_F6BC648F3	AT1G07230.1	0	Arabidopsis thaliana	Lipid/Carbohydrate metabolism	Unclear	Genomic evidence:microarray data	0.326676	0.513111	1.63393	1.58152
Traes_5DL_EE7FC3AEE	AT1G07230.1	E-135	Arabidopsis thaliana	Lipid/Carbohydrate metabolism	Unclear	Genomic evidence:microarray data	0.348409	0.295964	1.50008	1.31023
Traes_4AS_CDC673BD9	AT1G07430.1	E-100	Arabidopsis thaliana	Protein degradation/modification:Protein kinase and phosphatases	Unclear	Genomic evidence:microarray data	-0.320518	1.61168	2.48154	1.92973
Traes_2AL_5820832EF	AT1G08050.1	E-143	Arabidopsis thaliana	Protein degradation/modification	Unclear	Genomic evidence:microarray data	-0.146634	-0.541706	1.22476	2.2276
Traes_2DL_87BC2E82B	AT1G08050.1	E-122	Arabidopsis thaliana	Protein degradation/modification	Unclear	Genomic evidence:microarray data	-0.394113	-0.534436	1.16788	2.39357
Traes_6DL_FDF34AF3E	AT1G08050.1	E-155	Arabidopsis thaliana	Protein degradation/modification	Unclear	Genomic evidence:microarray data	0.349541	-0.438275	0.0814439	-0.802031
Traes_7DL_30B685267	AT1G08230.2	2e-60	Arabidopsis thaliana	Nucleic acid degradation	Unclear	Genomic evidence:microarray data	0.657853	-0.731158	-0.865769	-0.303484
Traes_7DL_F631D2D2E	AT1G08230.2	2e-56	Arabidopsis thaliana	Nucleic acid degradation	Unclear	Genomic evidence:microarray data	1.29738	-1.19878	-0.472498	0.710217
Traes_1BL_67EBDF570	AT1G09390.1	2e-81	Arabidopsis thaliana	Lipid/Carbohydrate metabolism	Unclear	Genomic evidence:microarray data	-0.213172	-0.177344	-1.10596	-1.74806
Traes_7DL_E48FCCB32	AT1G09510.1	3e-57	Arabidopsis thaliana	Lipid/Carbohydrate metabolism	Unclear	Genomic evidence:microarray data	0.155762	-0.47475	0.0645108	1.51833
Traes_2AL_F27B50401	AT1G11190.1	7e-53	Arabidopsis thaliana	Nucleic acid degradation:RNA and DNA degradation	Unclear	Molecular evidence:Northern and GUS staining ; Genomic evidence: microarray data	-0.52287	-0.065464	7.54287	5.79672
Traes_1AL_E25202CC2	AT1G11910.1	0	Arabidopsis thaliana	Protein degradation/modification	Unclear	Genomic evidence:microarray data	0.186416	0.693812	2.26672	2.86933
Traes_1AS_1A8023A17	AT1G11910.1	0	Arabidopsis thaliana	Protein degradation/modification	Unclear	Genomic evidence:microarray data	0.195513	0.4657	1.69815	1.44371
Traes_1BL_301F6C93C	AT1G11910.1	0	Arabidopsis thaliana	Protein degradation/modification	Unclear	Genomic evidence:microarray data	0.327109	1.54085	2.0892	2.20076
Traes_1BS_170500B8B	AT1G11910.1	E-180	Arabidopsis thaliana	Protein degradation/modification	Unclear	Genomic evidence:microarray data	0.0528141	0.319382	1.92382	1.48253
Traes_1DL_88DD1E468	AT1G11910.1	0	Arabidopsis thaliana	Protein degradation/modification	Unclear	Genomic evidence:microarray data	0.330484	1.80624	2.40911	2.24363
Traes_6BL_F1AC805AA	AT1G14080.1	E-115	Arabidopsis thaliana	Lipid/Carbohydrate metabolism:Fucosyltransferase	Unclear	Genomic evidence:microarray data	-0.244395	-0.206265	-0.768864	-1.86995
Traes_4DL_35887CCAD	AT1G20560.1	E-153	Arabidopsis thaliana	Lipid/Carbohydrate metabolism	Unclear	Genomic evidence:microarray data	0.166237	0.149113	-0.381251	-1.00131
Traes_1BS_C4B727779	AT1G21240.1	2e-92	Arabidopsis thaliana	Lipid/Carbohydrate metabolism	Unclear	Genomice evidence: microarray data	-0.697252	-2.68941	-3.54366	-4.38692
Traes_2BL_795807EE4	AT1G21240.1	E-104	Arabidopsis thaliana	Lipid/Carbohydrate metabolism	Unclear	Genomice evidence: microarray data	1.68674	-0.240565	-1.89285	-3.14187
Traes_2DL_36F021DAA	AT1G21240.1	E-136	Arabidopsis thaliana	Lipid/Carbohydrate metabolism	Unclear	Genomice evidence: microarray data	-0.3075	-2.04252	-1.5584	-2.40958
Traes_2DL_4B5D621C1	AT1G21240.1	E-108	Arabidopsis thaliana	Lipid/Carbohydrate metabolism	Unclear	Genomice evidence: microarray data	0.290352	-1.48082	-1.93957	-2.63733
Traes_5AL_1972E0F14	AT1G21240.1	E-123	Arabidopsis thaliana	Lipid/Carbohydrate metabolism	Unclear	Genomice evidence: microarray data	0.387697	-1.6362	-2.31203	-5.2139
Traes_5AL_EAD9FA63C	AT1G21240.1	E-116	Arabidopsis thaliana	Lipid/Carbohydrate metabolism	Unclear	Genomice evidence: microarray data	0.32312	-2.42022	-3.32327	-2.92776
Traes_5AL_FFA3A0686	AT1G21240.1	3e-94	Arabidopsis thaliana	Lipid/Carbohydrate metabolism	Unclear	Genomice evidence: microarray data	0.219811	-1.34011	0.988817	-1.3576
Traes_5BL_7D86C5969	AT1G21240.1	E-140	Arabidopsis thaliana	Lipid/Carbohydrate metabolism	Unclear	Genomice evidence: microarray data	0.231521	-4.6426	-3.91485	-5.50804
Traes_5BS_C5ED3EE63	AT1G21240.1	5e-54	Arabidopsis thaliana	Lipid/Carbohydrate metabolism	Unclear	Genomice evidence: microarray data	0.64269	-0.561597	-2.23412	-4.53335
Traes_5DL_1ACABB818	AT1G21240.1	E-124	Arabidopsis thaliana	Lipid/Carbohydrate metabolism	Unclear	Genomice evidence: microarray data	0.553877	-1.44875	-2.11649	-2.05643
Traes_5DL_5071F6CF2	AT1G21240.1	1e-92	Arabidopsis thaliana	Lipid/Carbohydrate metabolism	Unclear	Genomice evidence: microarray data	1.2375	-2.45241	-1.36511	-1.48053
Traes_5DL_5437177F6	AT1G21240.1	1e-91	Arabidopsis thaliana	Lipid/Carbohydrate metabolism	Unclear	Genomice evidence: microarray data	0.256758	-3.30394	-3.58355	-5.61131
Traes_6AS_F105D8F4B	AT1G21240.1	1e-54	Arabidopsis thaliana	Lipid/Carbohydrate metabolism	Unclear	Genomice evidence: microarray data	0.875107	-1.51976	-4.38413	-6.76651
Traes_3B_1E5C1BA40	AT1G21410.1	E-127	Arabidopsis thaliana	Protein degradation/modification:F-box	Unclear	Genomic evidence:microarray data	-0.0256716	2.11793	1.87399	2.94048
Traes_2AS_BEA212D85	AT1G23440.1	2e-81	Arabidopsis thaliana	Protein degradation/modification	Unclear	Genomic evidence:microarray data	-0.00978938	0.0710856	0.182298	1.27929
Traes_3AS_122E7F281	AT1G27980.1	0	Arabidopsis thaliana	Lipid/Carbohydrate metabolism	Unclear	Genomic evidence:microarray data	0.179015	1.11097	2.33035	2.82602
Traes_3B_158F0CB00	AT1G27980.1	0	Arabidopsis thaliana	Lipid/Carbohydrate metabolism	Unclear	Genomic evidence:microarray data	0.463979	0.831047	2.0068	2.83698
Traes_3DS_04A3FDD9A	AT1G27980.1	E-171	Arabidopsis thaliana	Lipid/Carbohydrate metabolism	Unclear	Genomic evidence:microarray data	0.446296	0.657796	1.68026	2.60795
Traes_2BL_175C78599	AT1G30220.1	E-142	Arabidopsis thaliana	Lipid/Carbohydrate metabolism	Unclear	Genomic evidence:microarray data	0.0130128	0.518283	0.875694	1.82096
Traes_2AL_F974CFFC2	AT1G30620.1	0	Arabidopsis thaliana	Lipid/Carbohydrate metabolism	Unclear	Genomic evidence:microarray data	0.848082	-0.601606	0.45557	0.942146
Traes_7AL_C9C8EEE40	AT1G30620.1	0	Arabidopsis thaliana	Lipid/Carbohydrate metabolism	Unclear	Genomic evidence:microarray data	0.115957	-0.0420583	1.50232	2.32518
Traes_7BL_1FB2CB41F	AT1G30620.1	0	Arabidopsis thaliana	Lipid/Carbohydrate metabolism	Unclear	Genomic evidence:microarray data	-0.0544591	0.0551423	1.51023	2.46823
Traes_1AL_B68AA4C68	AT1G30820.1	0	Arabidopsis thaliana	Nucleic acid metabolic process	Unclear	Genomic evidence:microarray data	0.272536	0.313077	1.7187	0.631719
Traes_1DL_715725157	AT1G30820.1	0	Arabidopsis thaliana	Nucleic acid metabolic process	Unclear	Genomic evidence:microarray data	0.667197	0.353439	1.84115	0.0117374
Traes_5DL_A159814E1	AT1G31230.1	0	Arabidopsis thaliana	Protein degradation/modification	Unclear	Genomic evidence:microarray data	-0.0877822	0.207966	0.0164081	-1.65127
Traes_1AL_6D1C60CD2	AT1G32940.1	E-155	Arabidopsis thaliana	Protein degradation/modification	Unclear	Genomic evidence:microarray data	-0.98684	-0.523196	-0.842258	-5.21561
Traes_1BL_F0FD9500F	AT1G32940.1	E-141	Arabidopsis thaliana	Protein degradation/modification	Unclear	Genomic evidence:microarray data	-0.759741	-0.484196	-2.85242	-4.58977
Traes_6AS_CA94C8157	AT1G32940.1	E-174	Arabidopsis thaliana	Protein degradation/modification	Unclear	Genomic evidence:microarray data	0.684612	-0.456055	-0.0425577	1.88779
Traes_6BS_865BFF5F4	AT1G32940.1	7e-92	Arabidopsis thaliana	Protein degradation/modification	Unclear	Genomic evidence:microarray data	1.48739	-1.11231	0.376328	2.99398
Traes_3AL_FF45EE896	AT1G44446.1	0	Arabidopsis thaliana	Chlorophyll biosynthesis	Delay	Genetic evidence:Transgene	-0.339511	-0.560606	-0.584635	-1.90126
Traes_3B_4B480BFB0	AT1G44446.1	0	Arabidopsis thaliana	Chlorophyll biosynthesis	Delay	Genetic evidence:Transgene	-0.279026	-0.601669	-0.849869	-2.34853
Traes_3DL_0A3CB06F8	AT1G44446.1	0	Arabidopsis thaliana	Chlorophyll biosynthesis	Delay	Genetic evidence:Transgene	-0.185358	-0.469227	-0.32259	-2.07012
Traes_2AL_6061FA883	AT1G47128.1	0	Arabidopsis thaliana	Nutrient recycling:Cysteine protease	Unclear	Molecular evidence: SSH and Northern	0.015747	0.286442	1.66422	3.09909
Traes_2BL_7D700A166	AT1G47128.1	0	Arabidopsis thaliana	Nutrient recycling:Cysteine protease	Unclear	Molecular evidence: SSH and Northern	0.118313	0.277342	1.51085	3.0536
Traes_3B_46FD08FE7	AT1G53310.3	0	Arabidopsis thaliana	Lipid/Carbohydrate metabolism	Unclear	Genomic evidence:microarray data	0.17494	0.153218	2.18171	-0.271384
Traes_5AL_65FC8CBE2	AT1G53310.3	0	Arabidopsis thaliana	Lipid/Carbohydrate metabolism	Unclear	Genomic evidence:microarray data	0.404608	0.485383	2.78977	0.0105069
Traes_5BL_6642E2A8B	AT1G53310.3	0	Arabidopsis thaliana	Lipid/Carbohydrate metabolism	Unclear	Genomic evidence:microarray data	0.423082	0.547365	2.30272	0.349524
Traes_5DL_DA19E2C89	AT1G53310.3	0	Arabidopsis thaliana	Lipid/Carbohydrate metabolism	Unclear	Genomic evidence:microarray data	0.652379	0.373805	3.27467	0.931983
Traes_7BL_684AB3DB3	AT1G53750.1	4e-95	Arabidopsis thaliana	Protein degradation/modification:26s Proteasome	Unclear	Molecular evidence: SSH and Northern	0.241457	0.397796	1.10554	1.66501
Traes_5AL_F96AEDDB8	AT1G54100.2	0	Arabidopsis thaliana	Lipid/Carbohydrate metabolism:Fatty acid catabolism	Unclear	Genomic evidence:microarray data	0.16468	1.0724	3.19894	4.7178
Traes_5BL_62D9B877B	AT1G54100.2	0	Arabidopsis thaliana	Lipid/Carbohydrate metabolism:Fatty acid catabolism	Unclear	Genomic evidence:microarray data	0.360735	1.47399	4.31499	5.32459
Traes_5DL_A2A5A19B4	AT1G54100.2	0	Arabidopsis thaliana	Lipid/Carbohydrate metabolism:Fatty acid catabolism	Unclear	Genomic evidence:microarray data	0.24083	1.54233	5.28619	6.71893
Traes_2BL_CEC7F2D7B	AT1G54340.1	0	Arabidopsis thaliana	Lipid/Carbohydrate metabolism	Unclear	Genomic evidence:microarray data	0.203098	0.534871	1.05207	1.38294
Traes_3AL_3D5C860FD	AT1G54340.1	E-171	Arabidopsis thaliana	Lipid/Carbohydrate metabolism	Unclear	Genomic evidence:microarray data	0.129936	0.597538	1.40429	1.50811
Traes_3B_63651ECFF	AT1G54340.1	2e-90	Arabidopsis thaliana	Lipid/Carbohydrate metabolism	Unclear	Genomic evidence:microarray data	0.432754	1.11044	1.80373	1.82869
Traes_3DL_6207B0CD3	AT1G54340.1	E-159	Arabidopsis thaliana	Lipid/Carbohydrate metabolism	Unclear	Genomic evidence:microarray data	0.115828	0.862949	0.96783	1.29157
Traes_2AL_E80BC759C	AT1G55120.1	E-166	Arabidopsis thaliana	Lipid/Carbohydrate metabolism	Unclear	Genomic evidence:microarray data	-0.731197	-1.15954	-0.78667	3.19133
Traes_2BL_7F9F8D481	AT1G55120.1	E-167	Arabidopsis thaliana	Lipid/Carbohydrate metabolism	Unclear	Genomic evidence:microarray data	-1.71161	-2.23415	-2.16328	2.10303
Traes_6AS_1A94E971B	AT1G55120.1	E-157	Arabidopsis thaliana	Lipid/Carbohydrate metabolism	Unclear	Genomic evidence:microarray data	0.152197	-0.0129077	1.61992	2.94621
Traes_6BS_45E6FBE8B	AT1G55120.1	E-158	Arabidopsis thaliana	Lipid/Carbohydrate metabolism	Unclear	Genomic evidence:microarray data	0.267535	0.325767	1.994	2.95503
Traes_5AL_9C9E55228	AT1G55850.1	0	Arabidopsis thaliana	Lipid/Carbohydrate metabolism	Unclear	Genomic evidence:microarray data	1.00993	0.475474	1.08421	1.61508
Traes_5DL_E133F0B4A	AT1G55850.1	0	Arabidopsis thaliana	Lipid/Carbohydrate metabolism	Unclear	Genomic evidence:microarray data	0.917256	0.700577	1.94404	3.14981
Traes_5DL_A711AB89A	AT1G57870.3	0	Arabidopsis thaliana	Protein degradation/modification	Unclear	Genomic evidence:microarray data	-0.151269	-0.697202	-1.61162	-2.56665
Traes_1DS_A477459F0	AT1G62290.2	E-178	Arabidopsis thaliana	Lipid/Carbohydrate metabolism	Unclear	Genomic evidence:microarray data	0.140465	0.522149	1.57743	1.28412
Traes_2AL_279C94831	AT1G65840.1	E-165	Arabidopsis thaliana	Polyamine pathway	Unclear	Genomic evidence:microarray data	0.445168	0.0949737	1.55123	2.03538
Traes_2AL_E647C7D11	AT1G65840.1	E-170	Arabidopsis thaliana	Polyamine pathway	Unclear	Genomic evidence:microarray data	-0.0695854	-1.13016	-0.385014	-0.0132587
Traes_2BL_56444264E	AT1G65840.1	E-165	Arabidopsis thaliana	Polyamine pathway	Unclear	Genomic evidence:microarray data	0.448656	0.0842325	1.83326	2.00409
Traes_2DL_678E7B37A	AT1G65840.1	E-151	Arabidopsis thaliana	Polyamine pathway	Unclear	Genomic evidence:microarray data	0.490515	0.242655	2.70256	2.2817
Traes_1DL_19271CD0B	AT1G72770.1	1e-64	Arabidopsis thaliana	Protein degradation/modification:Protein kinase and phosphatases	Unclear	Genomic evidence:microarray data	0.0315973	1.75221	2.35043	2.43419
Traes_3B_04704B20F	AT1G72770.1	E-121	Arabidopsis thaliana	Protein degradation/modification:Protein kinase and phosphatases	Unclear	Genomic evidence:microarray data	0.0304328	1.14729	1.71701	1.61901
Traes_3B_81C936C24	AT1G72770.1	5e-85	Arabidopsis thaliana	Protein degradation/modification:Protein kinase and phosphatases	Unclear	Genomic evidence:microarray data	0.272585	1.4456	2.9284	3.11529
Traes_5BL_E1A888BDA	AT1G73270.1	E-110	Arabidopsis thaliana	Protein degradation/modification	Unclear	Genomic evidence:microarray data	0.588108	1.82879	3.80945	3.96732
Traes_5DL_0E87C99E1	AT1G73270.1	E-119	Arabidopsis thaliana	Protein degradation/modification	Unclear	Genomic evidence:microarray data	0	0.854027	6.23574	8.57645
Traes_5DL_4FF7BA97B	AT1G73270.1	E-107	Arabidopsis thaliana	Protein degradation/modification	Unclear	Genomic evidence:microarray data	0.715643	1.82965	3.95452	4.22885
Traes_6AL_83333E782	AT1G73980.1	0	Arabidopsis thaliana	Nucleic acid degradation	Unclear	Genomic evidence:microarray data	0.564519	0.874926	1.69411	2.49618
Traes_5AS_50A2496B9	AT1G78960.1	0	Arabidopsis thaliana	Lipid/Carbohydrate metabolism	Unclear	Genomic evidence:microarray data	2.42575	1.68811	3.05608	5.26271
Traes_5DS_669F20907	AT1G78960.1	0	Arabidopsis thaliana	Lipid/Carbohydrate metabolism	Unclear	Genomic evidence:microarray data	0.772223	0.572016	1.65463	3.54683
Traes_5DL_9D4164773	AT2G01250.1	E-110	Arabidopsis thaliana	Protein biosynthesis (translation)	Unclear	Genomic evidence:microarray data	0.310159	0.828402	-0.343087	-0.0153904
Traes_2AS_3EDDFBB19	AT2G02990.1	2e-66	Arabidopsis thaliana	Nucleic acid degradation:Ribonuclease	Unclear	Genomic evidence:microarray data	0.714235	1.73009	7.19079	6.25165
Traes_2BS_B296754F9	AT2G02990.1	2e-68	Arabidopsis thaliana	Nucleic acid degradation:Ribonuclease	Unclear	Genomic evidence:microarray data	0.777422	1.61133	6.95968	5.32114
Traes_5AS_DBE3EBA44	AT2G03530.2	E-155	Arabidopsis thaliana	Protein degradation/modification:F-box	Unclear	Genomic evidence:microarray data	-0.0236385	-0.184053	0.029115	0.902553
Traes_5BS_0BA23FE30	AT2G03530.2	6e-78	Arabidopsis thaliana	Protein degradation/modification:F-box	Unclear	Genomic evidence:microarray data	-0.294914	-0.218823	-0.0193637	1.12173
Traes_5BS_52A97D09A	AT2G03530.2	5e-79	Arabidopsis thaliana	Protein degradation/modification:F-box	Unclear	Genomic evidence:microarray data	-0.503793	-0.56575	-0.116904	0.953507
Traes_5AL_B5BBEB590	AT2G03890.1	0	Arabidopsis thaliana	Lipid/Carbohydrate metabolism	Unclear	Genomic evidence:microarray data	0.205412	0.936511	1.55599	1.70467
Traes_5DL_A67608151	AT2G03890.1	0	Arabidopsis thaliana	Lipid/Carbohydrate metabolism	Unclear	Genomic evidence:microarray data	0.299799	0.735595	1.43013	1.41227
Traes_4AL_02F7D1B1F	AT2G11810.1	E-169	Arabidopsis thaliana	Lipid/Carbohydrate metabolism	Unclear	Genomic evidence:microarray data	-0.0671813	-0.964624	4.97117	1.13691
Traes_4BS_90B7D3855	AT2G11810.1	E-168	Arabidopsis thaliana	Lipid/Carbohydrate metabolism	Unclear	Genomic evidence:microarray data	-1.10038	-1.30908	7.58798	3.15557
Traes_4DS_656B93262	AT2G11810.1	E-169	Arabidopsis thaliana	Lipid/Carbohydrate metabolism	Unclear	Genomic evidence:microarray data	0.00207721	-2.0652	6.11924	2.28296
Traes_1BL_B0FD45910	AT2G15390.2	5e-77	Arabidopsis thaliana	Metabolism	Unclear	Genomic evidence:microarray data	-0.362541	-1.50915	-4.71676	-5.25643
Traes_5AL_3505B85AB	AT2G17760.1	E-110	Arabidopsis thaliana	Protein degradation/modification	Unclear	Genomic evidence:microarray data	0.0797303	0.783456	-1.30199	-2.65641
Traes_5BL_E65AA1543	AT2G17760.1	E-118	Arabidopsis thaliana	Protein degradation/modification	Unclear	Genomic evidence:microarray data	-0.150494	0.853544	-0.494236	-1.69467
Traes_1BS_37426DBD4	AT2G19130.1	E-165	Arabidopsis thaliana	Protein degradation/modification:Protein kinase and phosphatases	Unclear	Genomic evidence:microarray data	-0.00153578	-1.44896	-0.610939	1.27939
Traes_2BS_857F08A1F	AT2G19130.1	5e-88	Arabidopsis thaliana	Protein degradation/modification:Protein kinase and phosphatases	Unclear	Genomic evidence:microarray data	0.178206	-1.61486	-1.36165	-0.520975
Traes_5BL_37536803D1	AT2G19130.1	E-119	Arabidopsis thaliana	Protein degradation/modification:Protein kinase and phosphatases	Unclear	Genomic evidence:microarray data	-0.154284	-2.35544	-1.26019	-0.767205
Traes_6AL_9B927DB84	AT2G19130.1	5e-65	Arabidopsis thaliana	Protein degradation/modification:Protein kinase and phosphatases	Unclear	Genomic evidence:microarray data	-0.333709	-3.80009	-1.38162	1.52797
Traes_7BL_D4E767D57	AT2G19130.1	E-115	Arabidopsis thaliana	Protein degradation/modification:Protein kinase and phosphatases	Unclear	Genomic evidence:microarray data	2.69688	2.28646	3.13257	4.86191
Traes_2BS_4F489C2B9	AT2G31500.1	0	Arabidopsis thaliana	Protein degradation/modification	Unclear	Genomic evidence:microarray data	-0.635723	-1.98082	-2.02892	-1.57233
Traes_1AL_E5224B6EA	AT2G33770.1	0	Arabidopsis thaliana	Protein degradation/modification	Unclear	Genomic evidence:microarray data	-0.0299814	0.607243	4.16973	1.41264
Traes_1BL_241A3B9EF	AT2G33770.1	0	Arabidopsis thaliana	Protein degradation/modification	Unclear	Genomic evidence:microarray data	0.0675278	0.393913	3.16401	0.730784
Traes_1DL_F122253A3	AT2G33770.1	0	Arabidopsis thaliana	Protein degradation/modification	Unclear	Genomic evidence:microarray data	0.316552	0.35471	4.04627	1.62707
Traes_6AL_643CE8D7C	AT2G36880.1	0	Arabidopsis thaliana	Lipid/Carbohydrate metabolism	Unclear	Genomic evidence:microarray data	0.184058	1.32023	1.7232	1.46347
Traes_6DL_F980A7D9A	AT2G36880.1	0	Arabidopsis thaliana	Lipid/Carbohydrate metabolism	Unclear	Genomic evidence:microarray data	0.506174	1.23233	1.77266	1.14345
Traes_1AS_9A7108A27	AT2G36970.1	E-155	Arabidopsis thaliana	Lipid/Carbohydrate metabolism	Unclear	Genomic evidence:microarray data	-0.29008	-1.81753	-2.54838	-6.31508
Traes_3B_BB54C1761	AT2G37970.1	4e-78	Arabidopsis thaliana	Lipid/Carbohydrate metabolism	Unclear	Genomic evidence:microarray data	0.896597	1.61739	1.92432	2.93356
Traes_1BL_F439F0D99	AT2G39420.1	5e-82	Arabidopsis thaliana	Lipid/Carbohydrate metabolism:Esterase/lipase/thioesterase	Unclear	Genomic evidence:microarray data	0.817475	-0.391111	0.811436	1.3721
Traes_4AL_29542DF45	AT2G39420.1	E-101	Arabidopsis thaliana	Lipid/Carbohydrate metabolism:Esterase/lipase/thioesterase	Unclear	Genomic evidence:microarray data	-0.527412	0.151284	0.739722	2.50077
Traes_3B_A5AAB0508	AT2G39780.1	4e-59	Arabidopsis thaliana	Nucleic acid degradation:ribonuclease	Unclear	Genomic evidence:microarray data	-0.129309	0.178574	2.40028	0.48362
Traes_2AS_BDB406ADE	AT2G40840.1	0	Arabidopsis thaliana	Lipid/Carbohydrate metabolism	Unclear	Genomic evidence:microarray data	0.172837	0.117327	-0.842651	-1.93703
Traes_2BS_764ACA81C	AT2G40840.1	0	Arabidopsis thaliana	Lipid/Carbohydrate metabolism	Unclear	Genomic evidence:microarray data	0.330371	0.254947	0.387467	-0.87037
Traes_1BL_58901F57C	AT2G42010.1	0	Arabidopsis thaliana	Lipid/Carbohydrate metabolism:Phospholipase D activity	Unclear	Genomic evidence:microarray data	0.646123	-0.664028	-1.99203	-2.4274
Traes_3B_12EC08778	AT2G42690.1	4e-67	Arabidopsis thaliana	Lipid/Carbohydrate metabolism:Lipid metabolism	Unclear	Molecular evidence: SSH and Northern	-0.304811	0.114263	-1.46571	-2.44183
Traes_5AL_1F730D0C4	AT2G42790.1	0	Arabidopsis thaliana	Lipid/Carbohydrate metabolism	Unclear	Genomic evidence:microarray data	0.280992	0.220418	1.40001	2.21438
Traes_5BL_1D75C197C	AT2G42790.1	4e-89	Arabidopsis thaliana	Lipid/Carbohydrate metabolism	Unclear	Genomic evidence:microarray data	0.254961	0.279723	1.35627	2.4191
Traes_5DL_E6D11E867	AT2G42790.1	0	Arabidopsis thaliana	Lipid/Carbohydrate metabolism	Unclear	Genomic evidence:microarray data	0.174113	0.282672	1.5864	2.58658
Traes_1DL_190A02B8A	AT2G43400.1	0	Arabidopsis thaliana	Protein degradation/modification	Delay	Genetic evidence:Mutant	0.0681147	0.00196897	1.45227	2.41985
Traes_2DS_65B31416B	AT2G44480.1	E-125	Arabidopsis thaliana	Lipid/Carbohydrate metabolism	Unclear	Genomic evidence:microarray data	0.0816463	1.91121	4.26228	5.99434
Traes_7AL_9BC56072C	AT2G44480.1	E-133	Arabidopsis thaliana	Lipid/Carbohydrate metabolism	Unclear	Genomic evidence:microarray data	-0.539848	1.03105	3.05778	7.37071
Traes_7BL_90719F198	AT2G44480.1	2e-94	Arabidopsis thaliana	Lipid/Carbohydrate metabolism	Unclear	Genomic evidence:microarray data	-0.255387	0.107761	1.72127	5.49919
Traes_7DL_3F4950EC3	AT2G44480.1	E-133	Arabidopsis thaliana	Lipid/Carbohydrate metabolism	Unclear	Genomic evidence:microarray data	-0.88756	0.0343491	2.82325	6.60901
Traes_2DS_2C622DE53	AT2G45910.1	E-108	Arabidopsis thaliana	Protein degradation/modification:Protein kinase family protein	Unclear	Genomic evidence:microarray data	0.177177	0.348599	2.14191	0.599048
Traes_6AL_EAF6A08EB	AT2G45910.1	1e-67	Arabidopsis thaliana	Protein degradation/modification:Protein kinase family protein	Unclear	Genomic evidence:microarray data	1.08091	1.89099	1.69077	-4.06091
Traes_5BL_3882BC657	AT3G03310.1	E-149	Arabidopsis thaliana	Lipid/Carbohydrate metabolism	Unclear	Genomic evidence:microarray data	0.0106917	-1.44544	2.29487	-0.17706
Traes_5DL_431C235B2	AT3G03310.1	E-113	Arabidopsis thaliana	Lipid/Carbohydrate metabolism	Unclear	Genomic evidence:microarray data	-0.282453	-0.791522	1.94906	-0.608921
Traes_4AL_8D0B3F9BC	AT3G03530.1	0	Arabidopsis thaliana	Lipid/Carbohydrate metabolism	Unclear	Genomic evidence:microarray data	0.318332	0.596233	6.30159	6.01116
Traes_4DS_6D27A2331	AT3G03530.1	0	Arabidopsis thaliana	Lipid/Carbohydrate metabolism	Unclear	Genomic evidence:microarray data	-0.273826	-0.853784	5.31781	5.53774
Traes_2BS_F66779538	AT3G03710.1	E-148	Arabidopsis thaliana	Protein degradation/modification	Unclear	Molecular evidence:Blast search	0.204255	-0.22178	-1.00638	-1.15849
Traes_6BS_6D9026EAE	AT3G04940.1	3e-88	Arabidopsis thaliana	Protein degradation/modification:Cysteine synthase	Unclear	Genomic evidence:microarray data	0.950452	1.97379	1.3452	-1.07744
Traes_1DS_723F2BE8F	AT3G05970.1	E-124	Arabidopsis thaliana	Lipid/Carbohydrate metabolism:Fatty acid catabolism	Unclear	Genomic evidence:microarray data	-0.0369314	0.791808	0.895381	3.46829
Traes_4BS_4AB1E803F	AT3G05970.1	0	Arabidopsis thaliana	Lipid/Carbohydrate metabolism:Fatty acid catabolism	Unclear	Genomic evidence:microarray data	0.108116	0.216025	1.38405	2.17414
Traes_5AL_D0BAC222E	AT3G05970.1	0	Arabidopsis thaliana	Lipid/Carbohydrate metabolism:Fatty acid catabolism	Unclear	Genomic evidence:microarray data	0.102219	0.275466	1.21312	1.97327
Traes_5BL_247741273	AT3G05970.1	0	Arabidopsis thaliana	Lipid/Carbohydrate metabolism:Fatty acid catabolism	Unclear	Genomic evidence:microarray data	0.349208	0.843608	1.50582	2.28909
Traes_5BL_3EFF17411	AT3G05970.1	2e-88	Arabidopsis thaliana	Lipid/Carbohydrate metabolism:Fatty acid catabolism	Unclear	Genomic evidence:microarray data	0.181315	0.768301	1.51527	2.03525
Traes_5DL_A1C812594	AT3G05970.1	0	Arabidopsis thaliana	Lipid/Carbohydrate metabolism:Fatty acid catabolism	Unclear	Genomic evidence:microarray data	0.195815	0.635601	0.963539	1.4042
Traes_2AS_1AB8E365C	AT3G06810.1	0	Arabidopsis thaliana	Lipid/Carbohydrate metabolism:Fatty acid catabolism	Unclear	Genomic evidence:microarray data	0.216321	0.398539	3.06564	2.30416
Traes_2AS_CA3457465	AT3G06810.1	7e-90	Arabidopsis thaliana	Lipid/Carbohydrate metabolism:Fatty acid catabolism	Unclear	Genomic evidence:microarray data	0.128534	0.235329	3.03959	2.25738
Traes_2BS_5EBC88E56	AT3G06810.1	0	Arabidopsis thaliana	Lipid/Carbohydrate metabolism:Fatty acid catabolism	Unclear	Genomic evidence:microarray data	0.109455	0.436404	2.94308	2.59871
Traes_2DS_863452C0F	AT3G06810.1	0	Arabidopsis thaliana	Lipid/Carbohydrate metabolism:Fatty acid catabolism	Unclear	Genomic evidence:microarray data	0.142001	0.259184	2.34885	1.3553
Traes_2DS_E6C77EB38	AT3G06810.1	2e-42	Arabidopsis thaliana	Lipid/Carbohydrate metabolism:Fatty acid catabolism	Unclear	Genomic evidence:microarray data	-0.0739584	0.297069	2.04515	1.14237
Traes_1AL_792843F86	AT3G06860.1	0	Arabidopsis thaliana	Lipid/Carbohydrate metabolism:Fatty acid catabolism	Unclear	Genomic evidence:microarray data	0.0787781	0.0856439	1.10924	1.51931
Traes_3AS_ABE1029B8	AT3G06860.1	0	Arabidopsis thaliana	Lipid/Carbohydrate metabolism:Fatty acid catabolism	Unclear	Genomic evidence:microarray data	0.181896	0.0013857	0.872775	1.90335
Traes_3B_D6CE2B369	AT3G06860.1	0	Arabidopsis thaliana	Lipid/Carbohydrate metabolism:Fatty acid catabolism	Unclear	Genomic evidence:microarray data	0.128428	0.171444	1.09521	1.8883
Traes_3DS_3981FE085	AT3G06860.1	2e-73	Arabidopsis thaliana	Lipid/Carbohydrate metabolism:Fatty acid catabolism	Unclear	Genomic evidence:microarray data	0.0699603	-0.0364164	0.860751	1.62018
Traes_3DS_6A96C249A	AT3G06860.1	0	Arabidopsis thaliana	Lipid/Carbohydrate metabolism:Fatty acid catabolism	Unclear	Genomic evidence:microarray data	0.0901858	0.040056	1.00894	1.87784
Traes_4AS_E2E0BF011	AT3G08720.2	E-175	Arabidopsis thaliana	Protein degradation/modification:Protein kinase and phosphatases	Unclear	Genomic evidence:microarray data	-0.072645	0.377702	3.42969	2.82108
Traes_4BL_148FF45FB	AT3G08720.2	E-174	Arabidopsis thaliana	Protein degradation/modification:Protein kinase and phosphatases	Unclear	Genomic evidence:microarray data	-0.244805	0.146503	2.79027	3.17361
Traes_4DL_39D5C46C6	AT3G08720.2	E-176	Arabidopsis thaliana	Protein degradation/modification:Protein kinase and phosphatases	Unclear	Genomic evidence:microarray data	-0.0589508	0.268473	3.18226	3.41237
Traes_3AL_E534F85E9	AT3G08760.1	E-133	Arabidopsis thaliana	Protein degradation/modification:Protein kinase and phosphatases	Unclear	Genomic evidence:microarray data	0.647256	0.0873245	1.73352	3.06891
Traes_1AL_1D8244B27	AT3G08860.1	0	Arabidopsis thaliana	Lipid/Carbohydrate metabolism	Unclear	Genomic evidence:microarray data	0.733084	2.48056	4.00412	2.60671
Traes_1BL_C6ACA137C	AT3G08860.1	0	Arabidopsis thaliana	Lipid/Carbohydrate metabolism	Unclear	Genomic evidence:microarray data	0.778609	3.55262	6.18308	4.81044
Traes_4AS_C2B77F64F	AT3G08860.1	E-173	Arabidopsis thaliana	Lipid/Carbohydrate metabolism	Unclear	Genomic evidence:microarray data	-0.227761	0.650918	0.00850928	1.30397
Traes_4DL_674511840	AT3G08860.1	E-173	Arabidopsis thaliana	Lipid/Carbohydrate metabolism	Unclear	Genomic evidence:microarray data	-0.336788	1.00941	0.979704	1.97166
Traes_3AL_E743F0C11	AT3G10150.1	4e-84	Arabidopsis thaliana	Protein degradation/modification:Protein serine/threonine phosphatase	Unclear	Genomic evidence:microarray data	-0.0494434	-1.15619	3.01349	-1.61455
Traes_4BL_5FE79F4B2	AT3G10450.1	E-113	Arabidopsis thaliana	Protein degradation/modification	Unclear	Genomic evidence:microarray data	-0.0585913	0.655436	3.14834	4.08738
Traes_2DL_17E028CA3	AT3G12500.1	E-130	Arabidopsis thaliana	Lipid/Carbohydrate metabolism	Unclear	Genomic evidence:microarray data	-0.317859	-0.473346	-1.76423	-4.84131
Traes_5BL_DE0C53CE2	AT3G12500.1	1e-73	Arabidopsis thaliana	Lipid/Carbohydrate metabolism	Unclear	Genomic evidence:microarray data	1.60866	1.93369	3.33556	2.75689
Traes_5BL_F5A06AA29	AT3G13380.1	0	Arabidopsis thaliana	Protein degradation/modification	Unclear	Genomic evidence:microarray data	-0.072949	0.594183	2.45322	4.04181
Traes_3B_F88542D34	AT3G15350.1	E-125	Arabidopsis thaliana	Lipid/Carbohydrate metabolism	Unclear	Genomic evidence:microarray data	-0.190417	-0.310412	-1.4989	-2.13067
Traes_1BS_85C7EF9D4	AT3G15730.1	0	Arabidopsis thaliana	Lipid/Carbohydrate metabolism:Lipid metabolism	Unclear	Molecular evidence: SSH and Northern	-0.006411	-0.457336	-1.36214	-2.03811
Traes_4AS_A3EAF8C80	AT3G17790.1	E-109	Arabidopsis thaliana	Metabolism	Unclear	Molecular evidence: SSH and Northern ; Genomic evidence:microarray data	-0.243553	0.48765	3.71073	3.37732
Traes_4BL_8E6854176	AT3G17790.1	E-112	Arabidopsis thaliana	Metabolism	Unclear	Molecular evidence: SSH and Northern ; Genomic evidence:microarray data	-0.216964	0.0147867	1.94909	2.54762
Traes_4DL_C02A2A149	AT3G17790.1	5e-73	Arabidopsis thaliana	Metabolism	Unclear	Molecular evidence: SSH and Northern ; Genomic evidence:microarray data	-0.212509	0.126696	2.89767	2.55936
Traes_6AL_562AE8B6E	AT3G17810.1	0	Arabidopsis thaliana	Nucleic acid degradation	Unclear	Genomic evidence:microarray data	-0.0294623	0.548937	1.9848	4.50722
Traes_6BL_C433D70A3	AT3G17810.1	E-159	Arabidopsis thaliana	Nucleic acid degradation	Unclear	Genomic evidence:microarray data	-0.111498	0.286885	0.318239	4.22342
Traes_6DL_A4CE8D26B	AT3G17810.1	7e-85	Arabidopsis thaliana	Nucleic acid degradation	Unclear	Genomic evidence:microarray data	-0.0914824	-0.134314	0.46575	4.77108
Traes_6DL_B345D3963	AT3G17810.1	3e-98	Arabidopsis thaliana	Nucleic acid degradation	Unclear	Genomic evidence:microarray data	0.161801	0.278598	0.654784	5.12716
Traes_1BL_5AEE95D4C	AT3G22840.1	4e-40	Arabidopsis thaliana	Chlorophyll degradation	Unclear	Genomic evidence:microarray data	2.05854	4.39863	0.721035	-0.170032
Traes_4AS_D13EBCE43	AT3G22840.1	3e-36	Arabidopsis thaliana	Chlorophyll degradation	Unclear	Genomic evidence:microarray data	1.9978	0.785786	0.578259	1.29719
Traes_5BL_A20F4C525	AT3G23000.1	E-108	Arabidopsis thaliana	Protein degradation/modification	Unclear	Genomic evidence:microarray data	-0.197748	-1.26714	0.552314	-2.00506
Traes_4AL_11FA5063B	AT3G23790.1	0	Arabidopsis thaliana	Lipid/Carbohydrate metabolism	Unclear	Genomic evidence:microarray data	0.33601	1.2854	3.11218	3.82174
Traes_5BL_8D7CE9CF9	AT3G23790.1	0	Arabidopsis thaliana	Lipid/Carbohydrate metabolism	Unclear	Genomic evidence:microarray data	0.330711	1.12925	2.6206	2.69603
Traes_5DL_E6020ED31	AT3G23790.1	0	Arabidopsis thaliana	Lipid/Carbohydrate metabolism	Unclear	Genomic evidence:microarray data	0.416289	1.35187	3.52132	4.4847
Traes_7DS_D12C876C5	AT3G25585.4	E-144	Arabidopsis thaliana	Lipid/Carbohydrate metabolism	Unclear	Genomic evidence:microarray data	0.219653	0.918154	2.3203	2.67261
Traes_3AS_4F5A9DEAB	AT3G27110.2	E-124	Arabidopsis thaliana	Protein degradation/modification	Unclear	Genomic evidence:microarray data	0.260597	0.984034	0.821926	-0.560446
Traes_3B_5D7382024	AT3G27110.2	E-123	Arabidopsis thaliana	Protein degradation/modification	Unclear	Genomic evidence:microarray data	0.525946	1.26242	0.865518	0.00836362
Traes_3DS_3F1246B99	AT3G27110.2	E-116	Arabidopsis thaliana	Protein degradation/modification	Unclear	Genomic evidence:microarray data	0.418048	1.32859	1.17478	0.0527711
Traes_6AL_60AFB444B	AT3G44300.1	E-123	Arabidopsis thaliana	Metabolism	Unclear	Molecular evidence: SSH and Northern	0.406251	0.86129	1.96356	2.15179
Traes_6DL_BBF78B02F	AT3G44300.1	E-126	Arabidopsis thaliana	Metabolism	Unclear	Molecular evidence: SSH and Northern	0.0882383	0.817911	1.06259	1.34654
Traes_1AS_536E18ACD	AT3G45300.1	0	Arabidopsis thaliana	Protein degradation/modification	Delay	Genetic evidence:Mutant	0.0701992	0.150399	1.30556	2.24744
Traes_1BS_CEB5DA163	AT3G45300.1	0	Arabidopsis thaliana	Protein degradation/modification	Delay	Genetic evidence:Mutant	0.263131	0.289754	0.946135	1.86392
Traes_1DS_F3A99134B	AT3G45300.1	0	Arabidopsis thaliana	Protein degradation/modification	Delay	Genetic evidence:Mutant	0.335191	0.156418	1.04588	2.01695
Traes_3DL_740865E24	AT3G47090.1	E-115	Arabidopsis thaliana	Protein degradation/modification:Protein kinase and phosphatases	Unclear	Genomic evidence:microarray data	0.417984	-4.47297	-2.49787	-1.72021
Traes_5DL_7BFD7261C	AT3G47090.1	1e-94	Arabidopsis thaliana	Protein degradation/modification:Protein kinase and phosphatases	Unclear	Genomic evidence:microarray data	1.22586	-2.85811	-2.58138	-2.80021
Traes_7DL_3E1183B3C	AT3G47090.1	9e-88	Arabidopsis thaliana	Protein degradation/modification:Protein kinase and phosphatases	Unclear	Genomic evidence:microarray data	2.31294	5.92547	7.02415	6.26064
Traes_5BL_7E69810D5	AT3G47340.1	0	Arabidopsis thaliana	Protein degradation/modification	Unclear	Genomic evidence:microarray data	0.611444	2.45835	3.74976	2.11251
Traes_1AL_3791A0A3A	AT3G48000.1	E-168	Arabidopsis thaliana	Lipid/Carbohydrate metabolism:Dehydrogenase	Unclear	Molecular evidence: SSH and Northern	0.746574	0.574498	2.07693	-0.724741
Traes_2BS_8684E0E15	AT3G48000.1	7e-50	Arabidopsis thaliana	Lipid/Carbohydrate metabolism:Dehydrogenase	Unclear	Molecular evidence: SSH and Northern	-0.126676	0.159341	-0.13937	-1.49736
Traes_2DL_7399173C7	AT3G48000.1	1e-92	Arabidopsis thaliana	Lipid/Carbohydrate metabolism:Dehydrogenase	Unclear	Molecular evidence: SSH and Northern	0.114098	0.758342	0.719865	1.76913
Traes_6DL_6DAB8F1D9	AT3G48000.1	2e-89	Arabidopsis thaliana	Lipid/Carbohydrate metabolism:Dehydrogenase	Unclear	Molecular evidence: SSH and Northern	0.33305	0.836942	1.18388	0.17025
Traes_4DL_6974F47A5	AT3G52180.1	E-120	Arabidopsis thaliana	Protein degradation/modification	Unclear	Genomic evidence:microarray data	-0.0221997	0.258676	-0.0696535	-0.772372
Traes_2BS_EF1490FF1	AT3G56310.1	E-147	Arabidopsis thaliana	Lipid/Carbohydrate metabolism	Unclear	Genomic evidence:microarray data	-0.230256	-0.701137	0.333672	1.80442
Traes_1AL_B5C73E7E6	AT3G62260.1	1e-84	Arabidopsis thaliana	Protein degradation/modification:Protein kinase and phosphatases	Unclear	Genomic evidence:microarray data	0.339701	-0.0765961	1.27662	1.51122
Traes_6AL_412CE3037	AT3G62260.1	5e-74	Arabidopsis thaliana	Protein degradation/modification:Protein kinase and phosphatases	Unclear	Genomic evidence:microarray data	0.507977	0.593904	2.50385	1.88305
Traes_6BL_CB82A5A65	AT3G62260.1	6e-74	Arabidopsis thaliana	Protein degradation/modification:Protein kinase and phosphatases	Unclear	Genomic evidence:microarray data	0.298643	1.4256	3.4807	2.6457
Traes_5BL_2136D403E	AT3G62710.1	0	Arabidopsis thaliana	Lipid/Carbohydrate metabolism	Unclear	Genomic evidence:microarray data	0.841892	2.56265	3.68353	5.65691
Traes_5BL_5A2634836	AT3G62710.1	E-144	Arabidopsis thaliana	Lipid/Carbohydrate metabolism	Unclear	Genomic evidence:microarray data	0.502793	1.90948	2.69832	4.44056
Traes_4AL_1CF27EAE5	AT4G00550.1	E-152	Arabidopsis thaliana	Lipid/Carbohydrate metabolism	Unclear	Genomic evidence:microarray data	0.312948	-0.187172	2.5839	1.46336
Traes_4BS_895114858	AT4G00550.1	E-154	Arabidopsis thaliana	Lipid/Carbohydrate metabolism	Unclear	Genomic evidence:microarray data	0.164057	0.390871	2.56088	1.84371
Traes_6AL_02ECEFFB7	AT4G02280.1	0	Arabidopsis thaliana	Lipid/Carbohydrate metabolism	Unclear	Genomic evidence:microarray data	-0.283504	0.0126606	2.15311	5.14365
Traes_6DL_3C0C05516	AT4G02280.1	0	Arabidopsis thaliana	Lipid/Carbohydrate metabolism	Unclear	Genomic evidence:microarray data	-0.390774	0.212886	2.17507	5.23917
Traes_5BL_36B4733ED	AT4G10960.1	E-132	Arabidopsis thaliana	Lipid/Carbohydrate metabolism	Unclear	Genomic evidence:microarray data	0.00606189	0.229265	1.09035	2.36619
Traes_5DL_E62052DC0	AT4G10960.1	E-116	Arabidopsis thaliana	Lipid/Carbohydrate metabolism	Unclear	Genomic evidence:microarray data	-0.147703	0.452102	1.34929	1.02361
Traes_2AL_1F06B7AB4	AT4G11800.1	0	Arabidopsis thaliana	Protein degradation/modification	Unclear	Genomic evidence:microarray data	-0.128742	-1.46754	3.67002	0.72209
Traes_2AL_C382A3A65	AT4G11800.1	E-141	Arabidopsis thaliana	Protein degradation/modification	Unclear	Genomic evidence:microarray data	-0.0407158	-1.83242	3.57308	0.473086
Traes_2AL_F26B8E544	AT4G11800.1	E-110	Arabidopsis thaliana	Protein degradation/modification	Unclear	Genomic evidence:microarray data	0.0152784	-1.05602	3.57211	0.621839
Traes_2BL_70B425A83	AT4G11800.1	0	Arabidopsis thaliana	Protein degradation/modification	Unclear	Genomic evidence:microarray data	0.172897	-0.466675	3.98124	0.599963
Traes_2DL_1C171DF7E	AT4G11800.1	0	Arabidopsis thaliana	Protein degradation/modification	Unclear	Genomic evidence:microarray data	-0.148576	-0.465401	2.2916	-0.321616
Traes_5BL_05EA5B82C	AT4G11800.1	0	Arabidopsis thaliana	Protein degradation/modification	Unclear	Genomic evidence:microarray data	0.501598	0.853366	2.70973	2.364
Traes_5BL_664BE3B1B	AT4G11800.1	0	Arabidopsis thaliana	Protein degradation/modification	Unclear	Genomic evidence:microarray data	0.127621	0.9756	2.65494	2.16644
Traes_5DL_DFE47E78E	AT4G11800.1	0	Arabidopsis thaliana	Protein degradation/modification	Unclear	Genomic evidence:microarray data	0.210871	0.478873	2.6073	2.09009
Traes_5AL_9BB8F318F	AT4G14880.2	E-115	Arabidopsis thaliana	Protein degradation/modification	Delay	Genetic evidence:Mutant	-0.122517	0.413354	0.0286109	-2.19468
Traes_5AS_EAE5D853B	AT4G14880.2	E-123	Arabidopsis thaliana	Protein degradation/modification	Delay	Genetic evidence:Mutant	0.443849	-0.228594	-1.03218	-1.3678
Traes_5BL_F1E1934A0	AT4G14880.2	E-115	Arabidopsis thaliana	Protein degradation/modification	Delay	Genetic evidence:Mutant	0.345557	0.120554	1.75888	0.0255137
Traes_5BS_1AC8D3009	AT4G14880.2	E-154	Arabidopsis thaliana	Protein degradation/modification	Delay	Genetic evidence:Mutant	0.406075	-0.885879	0.328627	0.405071
Traes_5DL_EF1C26105	AT4G14880.2	E-112	Arabidopsis thaliana	Protein degradation/modification	Delay	Genetic evidence:Mutant	-0.10678	-0.558005	-0.119397	-3.00961
Traes_4AL_FAB289E82	AT4G16760.1	0	Arabidopsis thaliana	Lipid/Carbohydrate metabolism:Fatty acid catabolism	Unclear	Genomic evidence:microarray data	0.11933	0.0557604	1.11948	0.905289
Traes_4AL_B2C5FB6E5	AT4G19420.1	E-103	Arabidopsis thaliana	Lipid/Carbohydrate metabolism	Unclear	Genomic evidence:microarray data	-0.782534	1.16162	-0.508762	-1.43807
Traes_6DL_08908F8DB	AT4G19420.1	6e-60	Arabidopsis thaliana	Lipid/Carbohydrate metabolism	Unclear	Genomic evidence:microarray data	1.5498	1.04827	-0.357374	-4.3132
Traes_2AL_F1C4FF20C	AT4G19860.1	E-126	Arabidopsis thaliana	Lipid/Carbohydrate metabolism	Unclear	Genomic evidence:microarray data	0.015654	-0.096281	1.45968	2.55226
Traes_2BL_3DBAA0726	AT4G19860.1	E-114	Arabidopsis thaliana	Lipid/Carbohydrate metabolism	Unclear	Genomic evidence:microarray data	-0.0369983	0.233099	2.26352	2.73882
Traes_2DL_0F859298B	AT4G19860.1	E-125	Arabidopsis thaliana	Lipid/Carbohydrate metabolism	Unclear	Genomic evidence:microarray data	-0.331659	0.0388963	1.35916	2.77506
Traes_5BS_F93273CED	AT4G20320.2	0	Arabidopsis thaliana	Nucleic acid degradation	Unclear	Genomic evidence:microarray data	-0.190287	-0.294173	1.16193	2.09076
Traes_2DS_0FF13778E	AT4G21410.1	E-113	Arabidopsis thaliana	Protein degradation/modification	Unclear	Genomic evidence:microarray data	0.383844	-2.06271	-1.27621	-0.52486
Traes_3B_7A8EB5D1A	AT4G21410.1	7e-88	Arabidopsis thaliana	Protein degradation/modification	Unclear	Genomic evidence:microarray data	-0.373782	-2.02022	-3.57755	-7.8664
Traes_4AL_9601B9873	AT4G21410.1	2e-90	Arabidopsis thaliana	Protein degradation/modification	Unclear	Genomic evidence:microarray data	0.355269	0.703823	1.67295	-1.76306
Traes_2BS_29FB79919	AT4G23150.1	E-140	Arabidopsis thaliana	Protein degradation/modification:Phosphorylation	Unclear	Genomice evidence: microarray data	0.626083	-1.31084	-0.200823	-0.552245
Traes_4AL_CD13F08C8	AT4G23150.1	E-136	Arabidopsis thaliana	Protein degradation/modification:Phosphorylation	Unclear	Genomice evidence: microarray data	0.265435	-1.46421	-4.72935	-6.04174
Traes_6BS_7E02A04C4	AT4G29010.1	0	Arabidopsis thaliana	Lipid/Carbohydrate metabolism:Fatty acid catabolism	Unclear	Genomic evidence:microarray data	0.280858	0.268058	1.50656	2.50591
Traes_6BS_B70BC74F5	AT4G29010.1	9e-93	Arabidopsis thaliana	Lipid/Carbohydrate metabolism:Fatty acid catabolism	Unclear	Genomic evidence:microarray data	0.188564	0.4099	1.5591	2.48143
Traes_6DS_C972C6A71	AT4G29010.1	0	Arabidopsis thaliana	Lipid/Carbohydrate metabolism:Fatty acid catabolism	Unclear	Genomic evidence:microarray data	0.155293	0.510569	1.36759	2.28809
Traes_2BS_8F481F00B	AT4G29050.1	0	Arabidopsis thaliana	Protein degradation/modification:Protein kinase and phosphatases	Unclear	Genomic evidence:microarray data	0.763916	0.545978	2.01305	2.71517
Traes_3AS_1D618944D	AT4G29050.1	E-143	Arabidopsis thaliana	Protein degradation/modification:Protein kinase and phosphatases	Unclear	Genomic evidence:microarray data	-0.204433	-3.42014	-4.16256	-3.72262
Traes_6AL_FE126E2C3	AT4G29380.1	0	Arabidopsis thaliana	Protein degradation/modification:Protein kinase and phosphatases	Unclear	Genomic evidence:microarray data	-0.0476817	0.323375	0.995219	1.48618
Traes_2AL_8DF1244C4	AT4G30270.1	5e-67	Arabidopsis thaliana	Lipid/Carbohydrate metabolism	Unclear	Molecular evidence:cDNA library; Molecular evidence: SSH and Northern	1.43806	4.4021	6.02268	5.70646
Traes_7DL_AD8F90F24	AT4G30270.1	2e-97	Arabidopsis thaliana	Lipid/Carbohydrate metabolism	Unclear	Molecular evidence:cDNA library; Molecular evidence: SSH and Northern	-0.462522	-1.82462	-3.11759	-4.57808
Traes_2AS_6345FCE27	AT4G30960.1	E-145	Arabidopsis thaliana	Protein degradation/modification:Protein kinase and phosphatases	Unclear	Genomic evidence:microarray data	0.612857	2.02859	2.42663	1.16025
Traes_2BS_0ABED462E	AT4G30960.1	E-145	Arabidopsis thaliana	Protein degradation/modification:Protein kinase and phosphatases	Unclear	Genomic evidence:microarray data	0.157362	1.33146	2.08754	1.47889
Traes_2DS_81BB5290E1	AT4G30960.1	E-145	Arabidopsis thaliana	Protein degradation/modification:Protein kinase and phosphatases	Unclear	Genomic evidence:microarray data	0.84541	1.9298	1.98838	1.11139
Traes_4AL_A8EEBE537	AT4G30960.1	E-129	Arabidopsis thaliana	Protein degradation/modification:Protein kinase and phosphatases	Unclear	Genomic evidence:microarray data	0.772274	1.80111	2.51053	-0.31192
Traes_4AS_3C90613EE	AT4G30960.1	E-137	Arabidopsis thaliana	Protein degradation/modification:Protein kinase and phosphatases	Unclear	Genomic evidence:microarray data	0.060291	-0.217259	0.862081	0.439502
Traes_4BL_EB0E59B6D	AT4G30960.1	1e-73	Arabidopsis thaliana	Protein degradation/modification:Protein kinase and phosphatases	Unclear	Genomic evidence:microarray data	0.587505	2.3517	4.03849	4.32401
Traes_4BS_47C0E033A	AT4G30960.1	E-129	Arabidopsis thaliana	Protein degradation/modification:Protein kinase and phosphatases	Unclear	Genomic evidence:microarray data	0.777918	2.39077	3.52057	1.70585
Traes_4DS_DBAA2CC451	AT4G30960.1	E-129	Arabidopsis thaliana	Protein degradation/modification:Protein kinase and phosphatases	Unclear	Genomic evidence:microarray data	0.214641	2.03116	3.67727	1.02687
Traes_7BL_4437E5002	AT4G32250.3	0	Arabidopsis thaliana	Protein degradation/modification:Protein kinase and phosphatases	Unclear	Genomic evidence:microarray data	-0.062643	0.343871	0.693025	4.06633
Traes_7DL_614CB5BF3	AT4G32250.3	0	Arabidopsis thaliana	Protein degradation/modification:Protein kinase and phosphatases	Unclear	Genomic evidence:microarray data	0.171759	0.295857	0.0841149	1.68142
Traes_3AL_0611800C6	AT4G32940.1	0	Arabidopsis thaliana	Vacuolar processing enzyme	Unclear	Molecular evidence: SSH and Northern ; Genomic evidence:microarray data	1.30497	3.14669	3.95	3.42538
Traes_3B_8BBBA6EEE	AT4G32940.1	0	Arabidopsis thaliana	Vacuolar processing enzyme	Unclear	Molecular evidence: SSH and Northern ; Genomic evidence:microarray data	0.538766	1.92782	2.74465	2.71463
Traes_3B_B5696416B	AT4G32940.1	0	Arabidopsis thaliana	Vacuolar processing enzyme	Unclear	Molecular evidence: SSH and Northern ; Genomic evidence:microarray data	0.190494	1.64298	0.866056	0.177809
Traes_3DL_190A19166	AT4G32940.1	4e-60	Arabidopsis thaliana	Vacuolar processing enzyme	Unclear	Molecular evidence: SSH and Northern ; Genomic evidence:microarray data	-0.365268	0.810905	0.0492823	-1.01561
Traes_3DL_304C8DD67	AT4G32940.1	0	Arabidopsis thaliana	Vacuolar processing enzyme	Unclear	Molecular evidence: SSH and Northern ; Genomic evidence:microarray data	0.389857	1.96687	2.46446	2.04144
Traes_3DL_C1FD5EB05	AT4G32940.1	0	Arabidopsis thaliana	Vacuolar processing enzyme	Unclear	Molecular evidence: SSH and Northern ; Genomic evidence:microarray data	0.0270025	1.37856	0.843056	-0.717966
Traes_3DL_DFEA98709	AT4G32940.1	2e-69	Arabidopsis thaliana	Vacuolar processing enzyme	Unclear	Molecular evidence: SSH and Northern ; Genomic evidence:microarray data	-0.158378	0.973073	0.373899	-0.842645
Traes_5BL_0F4F3F17F	AT4G32940.1	E-171	Arabidopsis thaliana	Vacuolar processing enzyme	Unclear	Molecular evidence: SSH and Northern ; Genomic evidence:microarray data	-0.184071	0.886288	4.83666	8.02833
Traes_5DL_B3D04CE3D	AT4G32940.1	E-170	Arabidopsis thaliana	Vacuolar processing enzyme	Unclear	Molecular evidence: SSH and Northern ; Genomic evidence:microarray data	-0.153221	1.82215	4.83291	7.20838
Traes_2BL_D8F68C3DC	AT4G34860.2	0	Arabidopsis thaliana	Lipid/Carbohydrate metabolism	Unclear	Genomic evidence:microarray data	0.0666044	-0.115022	0.0953286	1.49223
Traes_1AL_7763B43BF	AT4G34890.1	0	Arabidopsis thaliana	Nucleic acid degradation:purine catabolism	Delay	Genetic evidence:Mutant; Genomic evidence:microarray data	0.0965303	0.257822	1.38623	2.45042
Traes_1AL_D4D0050BD	AT4G34890.1	0	Arabidopsis thaliana	Nucleic acid degradation:purine catabolism	Delay	Genetic evidence:Mutant; Genomic evidence:microarray data	0.171456	0.520263	1.54819	2.53593
Traes_1BL_525464407	AT4G34890.1	2e-74	Arabidopsis thaliana	Nucleic acid degradation:purine catabolism	Delay	Genetic evidence:Mutant; Genomic evidence:microarray data	0.0222121	0.494798	1.67088	3.00917
Traes_1BL_5A31CB72E	AT4G34890.1	0	Arabidopsis thaliana	Nucleic acid degradation:purine catabolism	Delay	Genetic evidence:Mutant; Genomic evidence:microarray data	0.146903	0.514001	1.82964	3.15704
Traes_1DL_054225459	AT4G34890.1	E-145	Arabidopsis thaliana	Nucleic acid degradation:purine catabolism	Delay	Genetic evidence:Mutant; Genomic evidence:microarray data	0.10999	0.429009	1.81379	2.80464
Traes_1DL_BA85EEBCA	AT4G34890.1	0	Arabidopsis thaliana	Nucleic acid degradation:purine catabolism	Delay	Genetic evidence:Mutant; Genomic evidence:microarray data	0.0671692	0.273139	1.61316	2.76721
Traes_6AL_28CCA7F5D	AT4G35830.1	0	Arabidopsis thaliana	Lipid/Carbohydrate metabolism	Unclear	Genomic evidence:microarray data	0.156031	0.730236	1.20053	2.50681
Traes_6BL_4704FF2B4	AT4G35830.1	0	Arabidopsis thaliana	Lipid/Carbohydrate metabolism	Unclear	Genomic evidence:microarray data	0.219346	1.06157	1.126	1.76582
Traes_6DL_D3A3D1384	AT4G35830.1	0	Arabidopsis thaliana	Lipid/Carbohydrate metabolism	Unclear	Genomic evidence:microarray data	0.0595298	0.752655	1.24325	2.57647
Traes_2AL_3668C746C	AT4G36400.2	0	Arabidopsis thaliana	Lipid/Carbohydrate metabolism	Delay	Genetic evidence:Mutant	0.244996	0.435565	1.64431	2.59826
Traes_2BL_A42EAB22C	AT4G36400.2	E-147	Arabidopsis thaliana	Lipid/Carbohydrate metabolism	Delay	Genetic evidence:Mutant	0.454674	0.225063	1.31256	2.01646
Traes_2DL_2ADDA0563	AT4G36400.2	0	Arabidopsis thaliana	Lipid/Carbohydrate metabolism	Delay	Genetic evidence:Mutant	0.283801	0.0510981	1.34233	2.05757
Traes_7DL_0C02D38AD	AT4G37990.1	E-133	Arabidopsis thaliana	Lipid/Carbohydrate metabolism:Mannitol	Unclear	Genomic evidence:microarray data	-0.320111	-0.766058	-1.6909	-3.47647
Traes_1DS_D8A151F6E	AT4G39850.1	0	Arabidopsis thaliana	Lipid/Carbohydrate metabolism	Unclear	Genomic evidence:microarray data	0.0872383	-0.0376328	0.3933	1.26803
Traes_1AL_17C37FFB0	AT5G01920.1	3e-55	Arabidopsis thaliana	Protein degradation/modification	Unclear	Genomic evidence:microarray data	-0.0407232	-0.214742	-0.876597	-2.0441
Traes_1AL_D6D6DDE5E	AT5G01920.1	1e-56	Arabidopsis thaliana	Protein degradation/modification	Unclear	Genomic evidence:microarray data	-0.150349	-0.185727	-0.838753	-2.40253
Traes_5AS_5EBCE30AF	AT5G04720.1	E-172	Arabidopsis thaliana	Protein degradation/modification:Protein kinase and phosphatases	Unclear	Genomic evidence:microarray data	0.39213	-0.310328	0.981915	1.51465
Traes_4AL_900AC3A03	AT5G04900.1	6e-56	Arabidopsis thaliana	Chlorophyll degradation:Degradation of chlorophyll b and LHCII	Promote	Genetic evidence: mutant ; Proteomic evidence	0.176077	0.189264	1.34896	2.45773
Traes_4DS_20DB106A4	AT5G04900.1	1e-71	Arabidopsis thaliana	Chlorophyll degradation:Degradation of chlorophyll b and LHCII	Promote	Genetic evidence: mutant ; Proteomic evidence	0.103373	0.33451	2.34838	3.74998
Traes_6BL_3C04C3D2F	AT5G04900.1	E-128	Arabidopsis thaliana	Chlorophyll degradation:Degradation of chlorophyll b and LHCII	Promote	Genetic evidence: mutant ; Proteomic evidence	0.376167	0.759346	2.70964	3.90578
Traes_4AL_D1B99269E	AT5G07010.1	3e-60	Arabidopsis thaliana	Lipid/Carbohydrate metabolism	Unclear	Genomic evidence:microarray data	1.98283	-0.128367	-1.83768	-1.93572
Traes_1BL_858B71505	AT5G07920.1	0	Arabidopsis thaliana	Lipid/Carbohydrate metabolism	Unclear	Genomic evidence:microarray data	-0.457189	0.642459	1.79492	2.86758
Traes_3B_39C790430	AT5G08590.1	E-139	Arabidopsis thaliana	Protein degradation/modification	Unclear	Genomic evidence:microarray data	0.38236	0.8653	2.23487	1.97755
Traes_6DL_5282E0007	AT5G10770.1	7e-79	Arabidopsis thaliana	Protein degradation/modification	Unclear	Genomic evidence:microarray data	0.540949	-1.45317	-1.67637	-1.2625
Traes_3AS_6505083E0	AT5G11110.1	0	Arabidopsis thaliana	Lipid/Carbohydrate metabolism	Unclear	Genomic evidence:microarray data	0.0871004	-0.345227	2.87067	2.42164
Traes_3B_35D6F6CE7	AT5G11110.1	E-137	Arabidopsis thaliana	Lipid/Carbohydrate metabolism	Unclear	Genomic evidence:microarray data	0.0120682	0.0311888	3.15846	2.22227
Traes_3B_55B913FD2	AT5G11110.1	0	Arabidopsis thaliana	Lipid/Carbohydrate metabolism	Unclear	Genomic evidence:microarray data	0.055749	-0.0858116	3.16156	2.17179
Traes_3DS_9B89BAD5A	AT5G11110.1	0	Arabidopsis thaliana	Lipid/Carbohydrate metabolism	Unclear	Genomic evidence:microarray data	-0.213427	-0.0485064	2.21505	1.7715
Traes_4AL_DE6DA7E39	AT5G11110.1	E-173	Arabidopsis thaliana	Lipid/Carbohydrate metabolism	Unclear	Genomic evidence:microarray data	-0.37937	0.192698	0.194172	-2.3776
Traes_4BS_D4D9B5E3E	AT5G11110.1	0	Arabidopsis thaliana	Lipid/Carbohydrate metabolism	Unclear	Genomic evidence:microarray data	-0.40485	0.279385	0.741612	-2.07656
Traes_4DS_BD04D4260	AT5G11110.1	E-107	Arabidopsis thaliana	Lipid/Carbohydrate metabolism	Unclear	Genomic evidence:microarray data	-0.289412	0.192498	1.02677	-1.75035
Traes_3AS_9474A8C67	AT5G11650.1	2e-67	Arabidopsis thaliana	Protein degradation/modification	Unclear	Genomic evidence:microarray data	-0.0150426	-0.144138	0.880148	1.28759
Traes_3DL_A46119F9F	AT5G11950.1	4e-54	Arabidopsis thaliana	Protein degradation/modification	Unclear	Genomic evidence:microarray data	-0.153676	-0.587678	0.434214	1.41381
Traes_6DS_C6B1E3EE7	AT5G13110.1	0	Arabidopsis thaliana	Lipid/Carbohydrate metabolism	Unclear	Genomic evidence:microarray data	-0.389525	-0.307467	-0.744782	-2.08302
Traes_2BL_F95E57A0C	AT5G15140.1	E-102	Arabidopsis thaliana	Lipid/Carbohydrate metabolism	Unclear	Genomic evidence:microarray data	0.493927	0.777021	-0.276295	-0.449376
Traes_5BL_0C1E9AFB3	AT5G16120.1	E-130	Arabidopsis thaliana	Protein degradation/modification	Unclear	Genomic evidence:microarray data	0.519605	0.351194	1.24337	1.93714
Traes_4AS_538F2E3BD	AT5G21326.1	E-169	Arabidopsis thaliana	Protein degradation/modification	Unclear	Genomic evidence:microarray data	1.051	0.928635	2.73203	1.14674
Traes_7BL_91C297567	AT5G34850.1	0	Arabidopsis thaliana	Metabolism	Unclear	Molecular evidence: SSH and Northern	0.388097	0.817336	1.68532	2.13215
Traes_7DL_CDBB76729	AT5G34850.1	0	Arabidopsis thaliana	Metabolism	Unclear	Molecular evidence: SSH and Northern	0.210665	0.569477	1.23199	1.92664
Traes_1AL_B4D156915	AT5G38240.1	3e-72	Arabidopsis thaliana	Protein degradation/modification:Protein kinase and phosphatases	Unclear	Genomic evidence:microarray data	0.563613	0.264713	-1.20335	-1.39343
Traes_1AS_097B121E3	AT5G38240.1	1e-72	Arabidopsis thaliana	Protein degradation/modification:Protein kinase and phosphatases	Unclear	Genomic evidence:microarray data	0.244555	-1.9544	-2.54271	-2.47787
Traes_1AS_581D331E0	AT5G38240.1	2e-72	Arabidopsis thaliana	Protein degradation/modification:Protein kinase and phosphatases	Unclear	Genomic evidence:microarray data	0.785846	-0.683996	-3.11793	-3.63098
Traes_1BS_EF41B9A31	AT5G38240.1	7e-53	Arabidopsis thaliana	Protein degradation/modification:Protein kinase and phosphatases	Unclear	Genomic evidence:microarray data	0.35871	-0.72042	-2.17189	-1.713
Traes_1DS_35F810075	AT5G38240.1	6e-72	Arabidopsis thaliana	Protein degradation/modification:Protein kinase and phosphatases	Unclear	Genomic evidence:microarray data	0.209937	-0.830641	-0.355016	-0.183246
Traes_3B_857714A63	AT5G38240.1	3e-72	Arabidopsis thaliana	Protein degradation/modification:Protein kinase and phosphatases	Unclear	Genomic evidence:microarray data	0.930026	-0.711718	-0.95709	0.0251756
Novel08449	AT5G39030.1	8e-84	Arabidopsis thaliana	Protein degradation/modification:Protein kinase and phosphatases	Unclear	Genomic evidence:microarray data	0.333002	-1.121	-0.912686	-0.890037
Traes_1BS_EC27CC4EA	AT5G39030.1	6e-72	Arabidopsis thaliana	Protein degradation/modification:Protein kinase and phosphatases	Unclear	Genomic evidence:microarray data	0.319529	-0.860699	-1.11379	-1.00286
Traes_3B_90B17E3CF	AT5G39030.1	7e-82	Arabidopsis thaliana	Protein degradation/modification:Protein kinase and phosphatases	Unclear	Genomic evidence:microarray data	-0.156523	0.208957	-1.91554	-1.64957
Traes_3B_9BFC25547	AT5G39030.1	9e-83	Arabidopsis thaliana	Protein degradation/modification:Protein kinase and phosphatases	Unclear	Genomic evidence:microarray data	0.641445	0.0938862	0.687908	2.16871
Traes_5AL_DD9559147	AT5G39030.1	1e-62	Arabidopsis thaliana	Protein degradation/modification:Protein kinase and phosphatases	Unclear	Genomic evidence:microarray data	0.123724	-1.34983	-1.01053	-0.639278
Traes_3B_80C84EBC8	AT5G41700.4	3e-68	Arabidopsis thaliana	Protein degradation/modification:Ubiquitin		Molecular evidence:Y2H	-0.34076	0.793516	-0.468023	-1.40409
Traes_1AL_0C24CBB55	AT5G43060.1	E-104	Arabidopsis thaliana	Nutrient recycling:Cysteine protease	Unclear	Molecular evidence: SSH and Northern	0.375654	1.20192	2.08754	3.99624
Traes_1BL_611DF0433	AT5G43060.1	E-105	Arabidopsis thaliana	Nutrient recycling:Cysteine protease	Unclear	Molecular evidence: SSH and Northern	-0.0339639	0.264544	1.57032	3.92796
Traes_1DL_F9213AB33	AT5G43060.1	E-105	Arabidopsis thaliana	Nutrient recycling:Cysteine protease	Unclear	Molecular evidence: SSH and Northern	0.0311987	1.02559	2.62633	4.72802
Traes_4AL_925E5A9C4	AT5G43760.1	E-108	Arabidopsis thaliana	Nutrient recycling:Cysteine protease	Unclear	Molecular evidence: SSH and Northern	-0.690071	-2.90085	-5.67534	-5.44293
Traes_5AL_6284FBBD8	AT5G50260.1	6e-61	Arabidopsis thaliana	Protein degradation/modification	Unclear	Genomic evidence:microarray data	-0.0490174	1.13569	2.49958	4.02012
Traes_6DS_5942CF386	AT5G53350.1	E-136	Arabidopsis thaliana	Protein degradation/modification:Protease	Unclear	Molecular evidence: SSH and Northern ; Genomic evidence:microarray data	-0.0273556	0.399375	-0.831408	-0.327644
Novel04330	AT5G59700.1	E-151	Arabidopsis thaliana	Protein degradation/modification	Unclear	Genomic evidence:microarray data	0.118321	-0.391266	-1.25178	-1.78944
Traes_4DL_B1B736A00	AT5G59700.1	8e-72	Arabidopsis thaliana	Protein degradation/modification	Unclear	Genomic evidence:microarray data	0.341899	0.346462	-0.0694807	-1.05237
Traes_5BL_1126D831F	AT5G59700.1	E-170	Arabidopsis thaliana	Protein degradation/modification	Unclear	Genomic evidence:microarray data	0.274025	-0.973933	-1.03131	-0.743515
Traes_7DL_E0D00264F	AT5G59700.1	0	Arabidopsis thaliana	Protein degradation/modification	Unclear	Genomic evidence:microarray data	0.293493	-0.505904	-1.04151	-1.40251
Traes_2DL_725392324	AT5G64570.1	7e-70	Arabidopsis thaliana	Lipid/Carbohydrate metabolism	Unclear	Genomic evidence:microarray data	0.185864	1.04554	2.77775	2.51283
Traes_4AL_71305BD00	AT5G64570.1	0	Arabidopsis thaliana	Lipid/Carbohydrate metabolism	Unclear	Genomic evidence:microarray data	-0.26311	0.554587	4.4137	5.45153
Traes_7AS_FCA03D0CB	AT5G65110.1	0	Arabidopsis thaliana	Lipid/Carbohydrate metabolism:Fatty acid catabolism	Unclear	Genomic evidence:microarray data	0.165118	0.749396	2.25711	2.78015
Traes_7DS_23781E457	AT5G65110.1	0	Arabidopsis thaliana	Lipid/Carbohydrate metabolism:Fatty acid catabolism	Unclear	Genomic evidence:microarray data	0.173671	0.679066	3.06723	4.17766
Traes_2BL_38EEB8C0B	AT5G65600.1	E-112	Arabidopsis thaliana	Protein degradation/modification	Unclear	Genomic evidence:microarray data	0.294448	-3.11669	-4.83248	-7.83545
Traes_2AS_A56BC88C0	AT5G66880.1	E-108	Arabidopsis thaliana	Lipid/Carbohydrate metabolism	Unclear	Genomic evidence:microarray data	0.211493	-0.663716	-1.18293	-1.57983
Traes_2BS_9D77461D8	AT5G66880.1	E-137	Arabidopsis thaliana	Lipid/Carbohydrate metabolism	Unclear	Genomic evidence:microarray data	0.611498	-0.87252	-1.50661	-2.17431
Traes_2DL_6CD064E13	AT5G66880.1	E-139	Arabidopsis thaliana	Lipid/Carbohydrate metabolism	Unclear	Genomic evidence:microarray data	0.638783	2.48548	2.92387	2.52468
Traes_2DS_34BEEC8AB	AT5G66880.1	E-138	Arabidopsis thaliana	Lipid/Carbohydrate metabolism	Unclear	Genomic evidence:microarray data	0.611196	-0.857254	-1.17551	-1.43151
Traes_5AS_16B1B6B87	AT5G66880.1	E-147	Arabidopsis thaliana	Lipid/Carbohydrate metabolism	Unclear	Genomic evidence:microarray data	-0.37383	0.61878	2.0561	2.70697
Traes_5BS_78EC147D8	AT5G66880.1	E-163	Arabidopsis thaliana	Lipid/Carbohydrate metabolism	Unclear	Genomic evidence:microarray data	-0.269064	0.0993178	0.82485	1.58938
Traes_5BL_EFE5243F4	AY055589.1	5e-83	Sweet potato (Ipomoea batatas)	Protein degradation/modification	Unclear	Molecular evidence:Northern and SSH	-0.30162	0.334543	5.3509	9.4555
Traes_5DL_4FAF0F3C2	AY055589.1	E-108	Sweet potato (Ipomoea batatas)	Protein degradation/modification	Unclear	Molecular evidence:Northern and SSH	-0.192772	1.59649	5.70687	7.80679
Traes_5BL_8112F0DD3	AY850135.1	E-142	Hordeum vulgare	Macromolecule degradation	Promote	Molecular evidence	1.00586	2.0637	6.09281	7.26231
Traes_2AL_FA773418C	BN000093.1	E-175	Hordeum vulgare	Protein degradation/modification	Unclear	Molecular evidence:SSH	0.142694	1.19875	3.79619	4.64967
Traes_2DL_72D94626E	BN000093.1	3e-90	Hordeum vulgare	Protein degradation/modification	Unclear	Molecular evidence:SSH	-0.219999	2.02511	5.0313	6.05751
Traes_5AL_056A80914	BN000093.1	E-114	Hordeum vulgare	Protein degradation/modification	Unclear	Molecular evidence:SSH	-0.00594403	0.327513	1.06842	1.21226
Traes_5BL_679C187B0	BN000093.1	0	Hordeum vulgare	Protein degradation/modification	Unclear	Molecular evidence:SSH	0.101836	0.32847	1.19841	0.669225
Traes_5DL_A5A32C538	BN000093.1	0	Hordeum vulgare	Protein degradation/modification	Unclear	Molecular evidence:SSH	0.0619525	0.432671	0.87217	1.35109
Traes_3B_600FC81DA	EF521873.1	1e-87	Glycine max	Nucleic acid degradation	Unclear	Molecular evidence	0.202358	1.03944	2.1325	3.41783
Traes_3DS_0166803C6	EF521873.1	3e-61	Glycine max	Nucleic acid degradation	Unclear	Molecular evidence	-0.149486	-0.156839	0.663547	2.27708
Traes_3DS_81CAF4FDE	EF521873.1	2e-20	Glycine max	Nucleic acid degradation	Unclear	Molecular evidence	-0.697344	-0.77963	0.795797	3.39605
Traes_2AL_6B6086A7C	GRMZM2G001645_T01	E-109	Zea mays	Secondary metabolism.isoprenoids.mevalonate pathway.HMG-CoA reductase	Unclear	Genomic evidence:microarray data	1.31459	2.15229	2.86141	5.55726
Traes_2BL_E5F50498D	GRMZM2G001645_T01	E-110	Zea mays	Secondary metabolism.isoprenoids.mevalonate pathway.HMG-CoA reductase	Unclear	Genomic evidence:microarray data	0.778767	1.78432	3.68891	5.29463
Traes_2DL_2536A1C8C	GRMZM2G001645_T01	E-107	Zea mays	Secondary metabolism.isoprenoids.mevalonate pathway.HMG-CoA reductase	Unclear	Genomic evidence:microarray data	0.0541835	1.04428	2.67596	5.02678
Traes_1BS_672D28589	GRMZM2G020146_T01	8e-81	Zea mays	Protein.degradation.Serine protease	Unclear	Genomic evidence:microarray data	-0.563371	1.46028	3.41205	6.02975
Traes_1DS_8C0C4C146	GRMZM2G020146_T01	1e-82	Zea mays	Protein.degradation.Serine protease	Unclear	Genomic evidence:microarray data	-0.225636	1.58228	4.0188	6.2593
Traes_2AL_6936D7DD0	GRMZM2G026930_T01	0	Zea mays	Secondary metabolism.flavonoids.dihydroflavonols	Unclear	Genomic evidence:microarray data	-0.226207	0.184122	1.7269	2.92461
Traes_2BL_350C6D543	GRMZM2G026930_T01	0	Zea mays	Secondary metabolism.flavonoids.dihydroflavonols	Unclear	Genomic evidence:microarray data	-0.0647099	-0.173749	1.30026	2.43282
Traes_2DL_92D3036CC	GRMZM2G026930_T01	0	Zea mays	Secondary metabolism.flavonoids.dihydroflavonols	Unclear	Genomic evidence:microarray data	-0.212751	-0.13268	1.24746	2.57325
Traes_3AS_2572C1790	GRMZM2G026930_T02	E-148	Zea mays	Secondary metabolism.flavonoids.dihydroflavonols	Unclear	Genomic evidence:microarray data	-0.131061	0.436711	1.62579	2.14106
Traes_3AL_1AB3746B5	GRMZM2G026930_T03	E-150	Zea mays	Secondary metabolism.flavonoids.dihydroflavonols	Unclear	Genomic evidence:microarray data	0.261432	0.344198	1.13069	1.79196
Traes_3B_3BFEBBE14	GRMZM2G026930_T03	8e-60	Zea mays	Secondary metabolism.flavonoids.dihydroflavonols	Unclear	Genomic evidence:microarray data	0.00533387	-0.402782	0.882739	0.179933
Traes_3B_A0C73B654	GRMZM2G029547_T02	E-179	Zea mays	Secondary metabolism.flavonoids.dihydroflavonols	Unclear	Genomic evidence:microarray data	-0.255411	0.141151	1.01676	1.74876
Traes_3DS_487C7C08D	GRMZM2G029547_T02	0	Zea mays	Secondary metabolism.flavonoids.dihydroflavonols	Unclear	Genomic evidence:microarray data	-0.054236	0.311583	1.12152	2.05684
Traes_2AL_A6788778F	GRMZM2G029547_T03	4e-53	Zea mays	Secondary metabolism.flavonoids.dihydroflavonols	Unclear	Genomic evidence:microarray data	-0.647329	2.01239	8.93963	8.21965
Traes_2DL_D54054567	GRMZM2G029547_T03	7e-84	Zea mays	Secondary metabolism.flavonoids.dihydroflavonols	Unclear	Genomic evidence:microarray data	-0.368877	0.522182	2.36575	5.52362
Traes_2DL_4FB6419D4	GRMZM2G041959_T01	E-108	Zea mays	Protein.degradation.Ubiquitin.E5.SCF.FBOX	Unclear	Genomic evidence:microarray data	-1.67769	0.298278	2.43088	5.86667
Traes_6AL_91F3E548F	GRMZM2G041959_T01	E-112	Zea mays	Protein.degradation.Ubiquitin.E3.SCF.FBOX	Unclear	Genomic evidence:microarray data	0.472712	0.845578	4.53571	3.28389
Traes_6BL_798EC1015	GRMZM2G041959_T01	E-102	Zea mays	Protein.degradation.Ubiquitin.E4.SCF.FBOX	Unclear	Genomic evidence:microarray data	0.115141	1.25249	4.82603	2.54165
Traes_6DL_E4582581B	GRMZM2G041959_T01	E-113	Zea mays	Protein.degradation.Ubiquitin.E6.SCF.FBOX	Unclear	Genomic evidence:microarray data	1.14547	1.17483	4.54868	2.78482
Traes_4AL_D60A39314	GRMZM2G048836_T01	0	Zea mays	Protein.degradation.Metalloprotease	Unclear	Genomic evidence:microarray data	-0.0491742	-0.186808	1.04832	1.25086
Traes_2AL_C463CE949	GRMZM2G050234_T01	0	Zea mays	Secondary metabolism.flavonoids.dihydroflavonols	Unclear	Genomic evidence:microarray data	-0.207235	0.0394013	2.58524	3.76272
Traes_2BL_FDEA6E1DB	GRMZM2G050234_T01	0	Zea mays	Secondary metabolism.flavonoids.dihydroflavonols	Unclear	Genomic evidence:microarray data	0.304497	-0.0587947	2.44331	3.34419
Traes_2DL_5166B5215	GRMZM2G050234_T01	9e-51	Zea mays	Secondary metabolism.flavonoids.dihydroflavonols	Unclear	Genomic evidence:microarray data	-0.325892	-0.0538168	1.99263	3.44607
Traes_3AS_38993748F	GRMZM2G058095_T01	0	Zea mays	Secondary metabolism.isoprenoids.mevalonate pathway.HMG-CoA reductase	Unclear	Genomic evidence:microarray data	0.597521	1.46991	3.08622	2.04186
Traes_7AL_DA2363243	GRMZM2G058095_T01	0	Zea mays	Secondary metabolism.isoprenoids.mevalonate pathway.HMG-CoA reductase	Unclear	Genomic evidence:microarray data	0.306593	0.263815	2.47655	2.05346
Traes_7AS_8CC30284A	GRMZM2G058095_T01	0	Zea mays	Secondary metabolism.isoprenoids.mevalonate pathway.HMG-CoA reductase	Unclear	Genomic evidence:microarray data	1.26891	1.16231	2.33071	3.24547
Traes_7BS_BB0FECDBE	GRMZM2G058095_T01	E-178	Zea mays	Secondary metabolism.isoprenoids.mevalonate pathway.HMG-CoA reductase	Unclear	Genomic evidence:microarray data	1.25713	1.13651	2.24588	2.54073
Traes_7DL_A95F658D8	GRMZM2G058095_T01	0	Zea mays	Secondary metabolism.isoprenoids.mevalonate pathway.HMG-CoA reductase	Unclear	Genomic evidence:microarray data	1.0281	0.139031	1.44022	1.93738
Traes_7DS_AEAC5A726	GRMZM2G058095_T01	0	Zea mays	Secondary metabolism.isoprenoids.mevalonate pathway.HMG-CoA reductase	Unclear	Genomic evidence:microarray data	0.867874	-0.272977	1.0224	2.45075
Traes_4AL_A5AC2BDF2	GRMZM2G062396_T01	0	Zea mays	Secondary metabolism.flavonoids.dihydroflavonols	Unclear	Genomic evidence:microarray data	0.469296	-0.362458	0.865607	1.20278
Traes_4BS_63DD9D036	GRMZM2G062396_T01	0	Zea mays	Secondary metabolism.flavonoids.dihydroflavonols	Unclear	Genomic evidence:microarray data	0.0362736	-1.68741	-1.71146	-1.18693
Traes_4BS_71CB57A0D	GRMZM2G062396_T01	0	Zea mays	Secondary metabolism.flavonoids.dihydroflavonols	Unclear	Genomic evidence:microarray data	0.389106	-0.153279	-0.382551	1.59944
Traes_4BS_83AF90FC5	GRMZM2G062396_T01	0	Zea mays	Secondary metabolism.flavonoids.dihydroflavonols	Unclear	Genomic evidence:microarray data	0.545407	-0.620403	-0.881802	-0.0949143
Traes_4DS_7868A8C2E	GRMZM2G062396_T01	0	Zea mays	Secondary metabolism.flavonoids.dihydroflavonols	Unclear	Genomic evidence:microarray data	0.125476	-0.369068	-2.03222	0.0275369
Traes_4DS_E39A952AD	GRMZM2G062396_T01	0	Zea mays	Secondary metabolism.flavonoids.dihydroflavonols	Unclear	Genomic evidence:microarray data	0.42539	-0.622054	0.723287	2.94622
Traes_6AS_9557563D1	GRMZM2G062396_T01	0	Zea mays	Secondary metabolism.flavonoids.dihydroflavonols	Unclear	Genomic evidence:microarray data	-0.864482	-2.16615	-1.43431	0.507463
Traes_4AL_6EB9C1311	GRMZM2G070304_T01	E-114	Zea mays	Lipid metabolism.Phospholipid synthesis	Unclear	Genomic evidence:microarray data	0.191856	0.556828	1.99254	3.0629
Traes_4AL_F7B454B53	GRMZM2G070304_T01	E-172	Zea mays	Lipid metabolism.Phospholipid synthesis	Unclear	Genomic evidence:microarray data	0.142533	0.0400403	1.70796	2.53081
Traes_4BS_60B8B106E	GRMZM2G070304_T01	E-172	Zea mays	Lipid metabolism.Phospholipid synthesis	Unclear	Genomic evidence:microarray data	0.1617	0.160823	1.98604	2.96804
Traes_4DS_3D22096F1	GRMZM2G070304_T01	E-171	Zea mays	Lipid metabolism.Phospholipid synthesis	Unclear	Genomic evidence:microarray data	0.180981	0.448882	2.07396	3.11807
Traes_4DS_B58ADAD15	GRMZM2G070304_T01	E-169	Zea mays	Lipid metabolism.Phospholipid synthesis	Unclear	Genomic evidence:microarray data	0.116204	1.44686	2.6207	3.62422
Traes_6AS_67FD620BE	GRMZM2G088396_T01	0	Zea mays	Secondary metabolism.isoprenoids.tocopherol biosynthesis.hydroxyphenylpyruvate dioxygenase	Unclear	Genomic evidence:microarray data	0.424748	0.807118	2.48242	3.67185
Traes_6DS_1DEB9EA6F	GRMZM2G088396_T01	1e-66	Zea mays	Secondary metabolism.isoprenoids.tocopherol biosynthesis.hydroxyphenylpyruvate dioxygenase	Unclear	Genomic evidence:microarray data	0.220798	0.923853	1.43166	2.90045
Novel04245	GRMZM2G108849_T01	E-105	Zea mays	Protein.degradation.Cysteine protease	Unclear	Genomic evidence:microarray data	0.798213	-1.09472	-1.76265	-2.63303
Traes_3AL_7C8EF9125	GRMZM2G108849_T01	1e-57	Zea mays	Protein.degradation.Cysteine protease	Unclear	Genomic evidence:microarray data	0.424821	-1.54779	-2.30762	-3.86207
Traes_3B_EDFCBD301	GRMZM2G108849_T01	E-138	Zea mays	Protein.degradation.Cysteine protease	Unclear	Genomic evidence:microarray data	1.13014	-1.76767	0.548994	0.254042
Traes_3DL_48F92563F	GRMZM2G108849_T01	2e-23	Zea mays	Protein.degradation.Cysteine protease	Unclear	Genomic evidence:microarray data	0.683757	-1.49415	-1.9232	-3.02423
Traes_5DL_92CBBE968	GRMZM2G147268_T01	E-121	Zea mays	Amino acid metabolism.degradation.serine-glycine-cysteine group.glycine	Unclear	Genomic evidence:microarray data	-1.75865	-0.48869	-0.267738	0.290756
Traes_2AL_DC3904667	GRMZM2G147268_T04	E-102	Zea mays	Amino acid metabolism.degradation.serine-glycine-cysteine group.glycine	Unclear	Genomic evidence:microarray data	0.819114	0.911358	0.646147	-0.355279
Traes_2DL_F2D3DED15	GRMZM2G147268_T04	1e-96	Zea mays	Amino acid metabolism.degradation.serine-glycine-cysteine group.glycine	Unclear	Genomic evidence:microarray data	0.878695	1.23362	0.949342	-0.367463
Traes_6AL_989DD9AA1	GRMZM2G147268_T04	3e-53	Zea mays	Amino acid metabolism.degradation.serine-glycine-cysteine group.glycine	Unclear	Genomic evidence:microarray data	0.554481	-0.552433	1.36292	0.471119
Traes_6AS_157EE288B	GRMZM2G147268_T04	2e-59	Zea mays	Amino acid metabolism.degradation.serine-glycine-cysteine group.glycine	Unclear	Genomic evidence:microarray data	1.90677	3.00768	4.40735	4.23489
Traes_1BL_627D564A9	GRMZM2G456217_T01	4e-36	Zea mays	Protein.degradation.Cysteine protease	Unclear	Genomic evidence:microarray data	-0.644113	1.62056	1.95719	3.24821
Traes_5BL_88E594FCF	GRMZM2G456217_T01	0	Zea mays	Protein.degradation.Cysteine protease	Unclear	Genomic evidence:microarray data	-0.158298	0.872975	0.655074	-0.263518
Traes_5DL_A51C04BEB	GRMZM2G456217_T01	0	Zea mays	Protein.degradation.Cysteine protease	Unclear	Genomic evidence:microarray data	-0.238916	1.01655	0.668288	-0.156422
Traes_1AS_FDC3AF8A2	GSMUA_Achr10T16380_001	1e-92	Musa acuminata	Nucleotide metabolism	Unclear	Molecular evidence:RNA sequencing	0.425668	0.198249	2.3697	2.57678
Traes_1BS_520567B3A	GSMUA_Achr10T16380_001	7e-92	Musa acuminata	Nucleotide metabolism	Unclear	Molecular evidence:RNA sequencing	0.329921	1.67012	3.37149	5.26392
Traes_1DS_E89ABDAC6	GSMUA_Achr10T16380_001	2e-92	Musa acuminata	Nucleotide metabolism	Unclear	Molecular evidence:RNA sequencing	-0.16082	0.125101	2.4901	4.16678
Traes_5BL_7F59B65A3	GSMUA_Achr10T18280_001	0	Musa acuminata	Carbohydrate metabolism	Unclear	Molecular evidence:RNA sequencing	0.539465	-1.34925	-0.0844649	0.789721
Traes_5DL_0A7630D1E	GSMUA_Achr10T18280_001	0	Musa acuminata	Carbohydrate metabolism	Unclear	Molecular evidence:RNA sequencing	0.670103	-1.51617	0.250327	0.816796
Traes_1BS_D3FD8CC9D	GSMUA_Achr10T23080_001	0	Musa acuminata	Amino acid metabolism	Unclear	Molecular evidence:RNA sequencing	0.114277	0.0937725	0.419121	1.53688
Traes_1DS_EFDF9CB72	GSMUA_Achr10T23080_001	0	Musa acuminata	Amino acid metabolism	Unclear	Molecular evidence:RNA sequencing	0.140813	-0.108939	0.695107	1.52587
Traes_3B_1C1D702D1	GSMUA_Achr11T11150_001	9e-82	Musa acuminata	Carbohydrate metabolism	Unclear	Molecular evidence:RNA sequencing	0.488207	1.01325	1.95895	1.68708
Traes_4AL_A92657C6E	GSMUA_Achr2T06680_001	0	Musa acuminata	Carbohydrate metabolism	Unclear	Molecular evidence:RNA sequencing	-0.0822875	0.303082	1.21626	0.0499939
Traes_4DS_05DEB5A63	GSMUA_Achr2T06680_001	0	Musa acuminata	Carbohydrate metabolism	Unclear	Molecular evidence:RNA sequencing	-0.30438	0.0295876	0.883867	-0.814978
Traes_2AS_3A4166DAF	GSMUA_Achr2T06930_001	3e-99	Musa acuminata	Carbohydrate metabolism	Unclear	Molecular evidence:RNA sequencing	-0.425431	0.899544	0.436486	2.54848
Traes_2BS_0B11A6B7D	GSMUA_Achr2T06930_001	E-100	Musa acuminata	Carbohydrate metabolism	Unclear	Molecular evidence:RNA sequencing	-0.403184	1.26986	1.72598	2.95357
Traes_2DS_D58C49346	GSMUA_Achr2T06930_001	E-105	Musa acuminata	Carbohydrate metabolism	Unclear	Molecular evidence:RNA sequencing	-0.247995	0.600287	0.691327	3.17088
Traes_2AL_3F84846F1	GSMUA_Achr2T10430_001	0	Musa acuminata	Amino acid metabolism	Unclear	Molecular evidence:RNA sequencing	-0.0867569	0.633096	4.21329	4.47196
Traes_2DL_203C5F142	GSMUA_Achr2T10430_001	0	Musa acuminata	Amino acid metabolism	Unclear	Molecular evidence:RNA sequencing	-0.47197	-0.376314	3.01986	3.9656
Traes_5BL_6AD1640CB	GSMUA_Achr2T10430_001	0	Musa acuminata	Amino acid metabolism	Unclear	Molecular evidence:RNA sequencing	0.0974797	0.781103	1.74058	2.78094
Traes_5DL_FCD84F216	GSMUA_Achr2T10430_001	0	Musa acuminata	Amino acid metabolism	Unclear	Molecular evidence:RNA sequencing	-0.174194	0.332525	1.52504	2.68526
Traes_7DS_69AAFAE02	GSMUA_Achr3T07980_001	2e-91	Musa acuminata	Lipid and secondary metabolism	Unclear	Molecular evidence:RNA sequencing	0.315772	-1.53798	1.07184	0.85716
Traes_4AS_5135DC537	GSMUA_Achr4T16550_001	2e-71	Musa acuminata	Amino acid metabolism	Unclear	Molecular evidence:RNA sequencing	0.217707	-0.948862	1.07636	0.677896
Traes_3B_55C9357A4	GSMUA_Achr4T17840_001	E-122	Musa acuminata	Carbohydrate metabolism	Unclear	Molecular evidence:RNA sequencing	0.300373	-0.403263	0.776839	1.02425
Traes_4BS_C9070AEA4	GSMUA_Achr5T02740_001	0	Musa acuminata	Amino acid metabolism	Unclear	Molecular evidence:RNA sequencing	0.193663	0.253944	1.42063	1.7771
Traes_5AS_5C5BA8A57	GSMUA_Achr5T02740_001	0	Musa acuminata	Amino acid metabolism	Unclear	Molecular evidence:RNA sequencing	0.341948	0.806069	-0.0451959	-0.412906
Traes_5DS_1BD5492E6	GSMUA_Achr5T02740_001	0	Musa acuminata	Amino acid metabolism	Unclear	Molecular evidence:RNA sequencing	0.280173	1.11973	0.288806	-0.204002
Traes_1DL_3DC184911	GSMUA_Achr5T03490_001	1e-80	Musa acuminata	Lipid and secondary metabolism	Unclear	Molecular evidence:RNA sequencing	-0.115756	-0.35385	1.15208	1.81816
Traes_1BS_913BA3D6C	GSMUA_Achr5T04550_001	E-108	Musa acuminata	Lipid and secondary metabolism	Unclear	Molecular evidence:RNA sequencing	0.692206	2.40091	2.83403	5.02025
Traes_1DS_7B393D6CC	GSMUA_Achr5T04550_001	8e-86	Musa acuminata	Lipid and secondary metabolism	Unclear	Molecular evidence:RNA sequencing	-0.852443	2.44444	4.70622	7.21386
Traes_2AS_0607B91CB	GSMUA_Achr5T14190_001	E-131	Musa acuminata	Lipid and secondary metabolism	Unclear	Molecular evidence:RNA sequencing	-0.253915	0.154143	-2.60884	-5.44417
Traes_2BS_D7ED8BF9A	GSMUA_Achr5T14190_001	E-167	Musa acuminata	Lipid and secondary metabolism	Unclear	Molecular evidence:RNA sequencing	0.0662454	-0.0590951	-0.656661	-2.51986
Traes_2DS_AE6E354A9	GSMUA_Achr5T14190_001	E-147	Musa acuminata	Lipid and secondary metabolism	Unclear	Molecular evidence:RNA sequencing	-0.107975	0.347296	-2.81225	-4.95583
Traes_4DL_B75BA7E6C	GSMUA_Achr5T14190_001	E-163	Musa acuminata	Lipid and secondary metabolism	Unclear	Molecular evidence:RNA sequencing	0.633565	-2.20237	-1.87545	-0.674676
Traes_2AS_06B3F30C8	GSMUA_Achr5T18410_001	E-170	Musa acuminata	Amino acid metabolism	Unclear	Molecular evidence:RNA sequencing	-0.507785	-0.73699	2.21164	3.03951
Traes_5BL_A9BFB8F58	GSMUA_Achr5T18410_001	E-130	Musa acuminata	Amino acid metabolism	Unclear	Molecular evidence:RNA sequencing	0.0181896	0.928806	1.92335	3.29546
Traes_4AL_82AB2E772	GSMUA_Achr5T19880_001	0	Musa acuminata	Carbohydrate metabolism	Unclear	Molecular evidence:RNA sequencing	-0.841299	-0.334488	-2.81276	-3.86939
Traes_7AS_BD45B6DF6	GSMUA_Achr5T19880_001	E-132	Musa acuminata	Carbohydrate metabolism	Unclear	Molecular evidence:RNA sequencing	0.100075	0.580251	-0.910397	-3.81053
Traes_3AS_43C1A5022	GSMUA_Achr5T21240_001	E-150	Musa acuminata	Lipid and secondary metabolism	Unclear	Molecular evidence:RNA sequencing	-0.0205137	0.668779	2.79738	3.41651
Traes_3B_DEBB73EAC	GSMUA_Achr5T21240_001	E-175	Musa acuminata	Lipid and secondary metabolism	Unclear	Molecular evidence:RNA sequencing	0.448163	0.644116	2.85945	3.59327
Traes_5AL_8FA4EE61C	GSMUA_Achr5T24030_001	E-145	Musa acuminata	Lipid and secondary metabolism	Unclear	Molecular evidence:RNA sequencing	-0.15015	0.858774	1.53904	1.667
Traes_5DL_2FE2243C6	GSMUA_Achr5T24030_001	E-151	Musa acuminata	Lipid and secondary metabolism	Unclear	Molecular evidence:RNA sequencing	-0.163774	0.395237	0.47964	1.60404
Novel00379	GSMUA_Achr5T28130_001	8e-31	Musa acuminata	Fructose 2,6-bisphosphate metabolic process	Unclear	Molecular evidence:RNA sequencing	-0.318368	0.459038	-1.10445	-1.87255
Traes_1AS_68C560D6D	GSMUA_Achr5T28130_001	E-134	Musa acuminata	Fructose 2,6-bisphosphate metabolic process	Unclear	Molecular evidence:RNA sequencing	-0.273999	0.136599	-1.11982	-1.99485
Traes_1BS_0039045F7	GSMUA_Achr5T28130_001	0	Musa acuminata	Fructose 2,6-bisphosphate metabolic process	Unclear	Molecular evidence:RNA sequencing	-0.245032	-0.0391491	-1.35501	-2.14753
Traes_3B_91799D260	GSMUA_Achr6T15280_001	E-128	Musa acuminata	Lipid and secondary metabolism	Unclear	Molecular evidence:RNA sequencing	0.251249	0.542409	2.00391	2.1844
Traes_6AL_2271D1991	GSMUA_Achr6T22300_001	E-163	Musa acuminata	Lipid and secondary metabolism	Unclear	Molecular evidence:RNA sequencing	0.11361	1.34144	4.17367	5.25113
Traes_6BL_6D50346C9	GSMUA_Achr6T22300_001	E-136	Musa acuminata	Lipid and secondary metabolism	Unclear	Molecular evidence:RNA sequencing	0.172082	1.29766	3.90779	5.51776
Traes_6DL_9F263A3BF	GSMUA_Achr6T22300_001	E-158	Musa acuminata	Lipid and secondary metabolism	Unclear	Molecular evidence:RNA sequencing	0.00991877	0.939663	3.50549	4.80215
Traes_3AL_B6192AB1E	GSMUA_Achr7T08820_001	3e-91	Musa acuminata	Lipid and secondary metabolism	Unclear	Molecular evidence:RNA sequencing	0.203079	-1.29129	-2.05286	-0.741781
Traes_3B_483A87AAD	GSMUA_Achr7T08820_001	E-131	Musa acuminata	Lipid and secondary metabolism	Unclear	Molecular evidence:RNA sequencing	0.0193354	-2.33433	-3.64497	-2.36681
Traes_3B_86CA26CDB	GSMUA_Achr7T10900_001	E-100	Musa acuminata	Amino acid metabolism	Unclear	Molecular evidence:RNA sequencing	-0.472382	0.434814	-2.23081	-2.3761
Traes_1AL_C14240756	GSMUA_Achr7T14040_001	1e-09	Musa acuminata	Lipid and secondary metabolism	Unclear	Molecular evidence:RNA sequencing	-0.0113378	1.64284	3.60897	4.90877
Traes_5DL_B44C3E880	GSMUA_Achr7T22860_001	E-133	Musa acuminata	Lipid and secondary metabolism	Unclear	Molecular evidence:RNA sequencing	0.371493	1.32932	2.62683	4.72149
Traes_6DL_E534517F1	GSMUA_Achr8T11740_001	E-136	Musa acuminata	Lipid and secondary metabolism	Unclear	Molecular evidence:RNA sequencing	-0.253364	0.0479973	-0.924064	-3.29513
Traes_2AL_C6A21184F	GSMUA_Achr8T12220_001	E-111	Musa acuminata	Lipid and secondary metabolism	Unclear	Molecular evidence:RNA sequencing	0.382969	1.63502	2.34473	3.35574
Traes_2BL_3EC1FF2E5	GSMUA_Achr8T12220_001	2e-90	Musa acuminata	Lipid and secondary metabolism	Unclear	Molecular evidence:RNA sequencing	0.41644	2.21867	2.13844	2.37046
Traes_4BL_6B47F3B99	GSMUA_Achr8T20870_001	E-150	Musa acuminata	Carbohydrate metabolism	Unclear	Molecular evidence:RNA sequencing	0.0158628	0.8598	0.769571	1.27467
Traes_3DL_B1D9C4924	GSMUA_Achr8T26850_001	9e-80	Musa acuminata	Metabolism of Cofactors and Vitamins	Unclear	Molecular evidence:RNA sequencing	0.251512	0.79089	1.21412	1.4423
Traes_6AL_BFF9BD51D	GSMUA_Achr9T07730_001	0	Musa acuminata	Carbohydrate metabolism	Unclear	Molecular evidence:RNA sequencing	-0.186479	0.308033	-0.406349	-0.894043
Traes_2AS_76D816EE4	GSMUA_Achr9T11850_001	6e-96	Musa acuminata	Carbohydrate metabolism	Unclear	Molecular evidence:RNA sequencing	-0.0425157	-0.0246861	4.11176	8.33398
Traes_2AS_CF67B6097	GSMUA_Achr9T11850_001	E-110	Musa acuminata	Carbohydrate metabolism	Unclear	Molecular evidence:RNA sequencing	-1.12094	-0.479581	3.69312	7.8135
Traes_2BS_5E392919C	GSMUA_Achr9T11850_001	0	Musa acuminata	Carbohydrate metabolism	Unclear	Molecular evidence:RNA sequencing	-0.323253	-0.0136937	2.62674	8.67542
Traes_2DS_3432B2916	GSMUA_Achr9T11850_001	1e-99	Musa acuminata	Carbohydrate metabolism	Unclear	Molecular evidence:RNA sequencing	0	0	2.54045	8.49632
Traes_2DS_9721B4EA5	GSMUA_Achr9T11850_001	E-112	Musa acuminata	Carbohydrate metabolism	Unclear	Molecular evidence:RNA sequencing	0	0	3.30357	9.27883
Traes_3AS_860783913	LOC_Os01g08270.1	0	Oryza sativa	Protein biosynthesis	Unclear	Molecular evidence:SSH	0.337398	0.350425	0.683134	1.87924
Traes_3B_29F91AA70	LOC_Os01g08270.1	0	Oryza sativa	Protein biosynthesis	Unclear	Molecular evidence:SSH	0.345	0.233111	0.993442	1.97624
Traes_3DS_034FA9DE4	LOC_Os01g08270.1	E-120	Oryza sativa	Protein biosynthesis	Unclear	Molecular evidence:SSH	0.253395	0.54838	1.17029	1.96871
Traes_3AL_0A1239316	LOC_Os01g51410.1	0	Oryza sativa	Macromolecule metabolism	Unclear	Molecular evidence: SSH, Northern blot and RT-PCR	0.148095	0.190282	-0.297094	-1.21933
Traes_3AL_1CC018DF2	LOC_Os01g51410.1	8e-54	Oryza sativa	Macromolecule metabolism	Unclear	Molecular evidence: SSH, Northern blot and RT-PCR	0.0781617	0.211237	-0.307572	-0.960747
Traes_3AL_8512360E1	LOC_Os01g51410.1	1e-37	Oryza sativa	Macromolecule metabolism	Unclear	Molecular evidence: SSH, Northern blot and RT-PCR	0.177616	0.10595	-0.373624	-1.06145
Traes_3B_30EBACC7A	LOC_Os01g51410.1	1e-88	Oryza sativa	Macromolecule metabolism	Unclear	Molecular evidence: SSH, Northern blot and RT-PCR	0.123242	0.530189	0.128749	-0.740924
Traes_3B_88A414FC0	LOC_Os01g51410.1	E-154	Oryza sativa	Macromolecule metabolism	Unclear	Molecular evidence: SSH, Northern blot and RT-PCR	0.0858625	0.225852	-0.0451555	-0.967829
Traes_3B_AB4C039F1	LOC_Os01g51410.1	E-119	Oryza sativa	Macromolecule metabolism	Unclear	Molecular evidence: SSH, Northern blot and RT-PCR	0.173916	0.405221	0.0581561	-0.896934
Traes_3B_F7C19D8CE	LOC_Os01g51410.1	E-141	Oryza sativa	Macromolecule metabolism	Unclear	Molecular evidence: SSH, Northern blot and RT-PCR	0.0797899	0.160015	-0.112119	-1.08689
Traes_3DL_A6F32E158	LOC_Os01g51410.1	0	Oryza sativa	Macromolecule metabolism	Unclear	Molecular evidence: SSH, Northern blot and RT-PCR	0.21483	0.324331	-0.0177167	-0.824981
Traes_1AS_A53D11A37	LOC_Os01g52500.1	0	Oryza sativa	Macromolecule metabolism	Unclear	Molecular evidence: SSH, Northern blot and RT-PCR	0.35974	-0.527062	-0.403715	0.652106
Traes_1BS_101332870	LOC_Os01g52500.1	0	Oryza sativa	Macromolecule metabolism	Unclear	Molecular evidence: SSH, Northern blot and RT-PCR	0.461688	-0.186404	0.388232	1.7604
Traes_3AL_C0D1C4403	LOC_Os01g52500.1	0	Oryza sativa	Macromolecule metabolism	Unclear	Molecular evidence: SSH, Northern blot and RT-PCR	0.326953	0.855346	2.52399	3.15873
Traes_3B_EF4661AE0	LOC_Os01g52500.1	0	Oryza sativa	Macromolecule metabolism	Unclear	Molecular evidence: SSH, Northern blot and RT-PCR	0.211705	0.607467	1.52659	2.42013
Traes_3DL_F982BF0FB	LOC_Os01g52500.1	0	Oryza sativa	Macromolecule metabolism	Unclear	Molecular evidence: SSH, Northern blot and RT-PCR	0.495564	1.13575	2.74551	4.71234
Traes_2AS_94603BB74	LOC_Os01g58220.1	2e-48	Oryza sativa	Macromolecule metabolism	Unclear	Molecular evidence: SSH, Northern blot and RT-PCR	-0.349858	-0.103464	1.4488	2.23302
Traes_2BS_94603BB74	LOC_Os01g58220.1	9e-49	Oryza sativa	Macromolecule metabolism	Unclear	Molecular evidence: SSH, Northern blot and RT-PCR	-0.211081	0.0174222	0.983655	1.78134
Traes_2AL_044127979	LOC_Os02g32520.1	0	Oryza sativa	Macromolecule metabolism	Unclear	Molecular evidenc	0.0116863	-0.128043	-0.995391	-1.31741
Traes_2BL_7B5D31919	LOC_Os02g32520.1	0	Oryza sativa	Macromolecule metabolism	Unclear	Molecular evidenc	0.0526102	-0.205951	-1.3934	-1.75259
Traes_2DL_DE9AD5892	LOC_Os02g32520.1	0	Oryza sativa	Macromolecule metabolism	Unclear	Molecular evidenc	0.00384598	-0.377593	-1.49326	-1.75938
Traes_5AL_DE16B3C5C	LOC_Os02g32520.1	0	Oryza sativa	Macromolecule metabolism	Unclear	Molecular evidenc	0.727106	1.44025	4.86469	5.95416
Traes_5BL_9988C23FC	LOC_Os02g32520.1	0	Oryza sativa	Macromolecule metabolism	Unclear	Molecular evidenc	0.690348	0.911021	3.52694	4.1474
Traes_5DL_E83F92234	LOC_Os02g32520.1	0	Oryza sativa	Macromolecule metabolism	Unclear	Molecular evidenc	0.617845	0.535507	3.29586	4.04776
Traes_2AL_73928B530	LOC_Os02g39970.1	0	Oryza sativa	Protein degradation/modification:Macromolecule metabolism	Unclear	Molecular evidence: SSH, Northern blot and RT-PCR	-0.247056	-0.446051	0.016606	1.02396
Traes_2BL_15A54E67F	LOC_Os02g39970.1	0	Oryza sativa	Protein degradation/modification:Macromolecule metabolism	Unclear	Molecular evidence: SSH, Northern blot and RT-PCR	-0.28313	-0.275381	0.420384	1.266
Traes_2DL_844ADB53A	LOC_Os02g39970.1	0	Oryza sativa	Protein degradation/modification:Macromolecule metabolism	Unclear	Molecular evidence: SSH, Northern blot and RT-PCR	-0.361576	-0.30676	0.278679	1.04373
Traes_4BL_DD7569D22	LOC_Os03g02590.1	3e-97	Oryza sativa	Macromolecule metabolism	Unclear	Molecular evidence: SSH, Northern blot and RT-PCR	-0.0428673	-0.0376255	-0.405117	-0.992775
Traes_4DL_0971895E8	LOC_Os03g02590.1	E-117	Oryza sativa	Macromolecule metabolism	Unclear	Molecular evidence: SSH, Northern blot and RT-PCR	-0.204027	-0.074346	-0.427851	-1.2771
Traes_5AL_13E38EF75	LOC_Os03g02590.1	4e-62	Oryza sativa	Macromolecule metabolism	Unclear	Molecular evidence: SSH, Northern blot and RT-PCR	-0.13888	-0.332772	-0.387405	-1.06799
Traes_4BL_322D1B278	LOC_Os03g04930.1	0	Oryza sativa	Protein biosynthesis	Unclear	Molecular evidence: SSH, Northern blot and RT-PCR	0.406391	0.363902	1.29207	1.89509
Traes_4DL_FB686D109	LOC_Os03g04930.1	0	Oryza sativa	Protein biosynthesis	Unclear	Molecular evidence: SSH, Northern blot and RT-PCR	0.355726	0.142606	1.37986	1.72044
Traes_5AL_31B0A489E	LOC_Os03g04930.1	0	Oryza sativa	Protein biosynthesis	Unclear	Molecular evidence: SSH, Northern blot and RT-PCR	0.432596	0.156104	2.29068	2.12855
Traes_3AS_3CB8A9C01	LOC_Os03g51080.1	E-165	Oryza sativa	Macromolecule metabolism	Unclear	Molecular evidence: SSH, Northern blot and RT-PCR	-0.186045	-0.0119662	-1.49833	-3.69126
Traes_3B_B96A4CFA6	LOC_Os03g51080.1	0	Oryza sativa	Macromolecule metabolism	Unclear	Molecular evidence: SSH, Northern blot and RT-PCR	-0.31197	0.28183	-1.38617	-2.81627
Traes_3DS_E756029E7	LOC_Os03g51080.1	E-117	Oryza sativa	Macromolecule metabolism	Unclear	Molecular evidence: SSH, Northern blot and RT-PCR	-0.183179	0.64713	-0.815659	-2.73656
Traes_4AL_9BCB37710	LOC_Os03g51080.1	0	Oryza sativa	Macromolecule metabolism	Unclear	Molecular evidence: SSH, Northern blot and RT-PCR	0.301535	0.0437806	1.76842	1.76111
Traes_4AS_ED8D7EE94	LOC_Os03g51080.1	0	Oryza sativa	Macromolecule metabolism	Unclear	Molecular evidence: SSH, Northern blot and RT-PCR	-0.151592	1.04614	2.82661	3.97275
Traes_4BS_D94FACCE2	LOC_Os03g51080.1	0	Oryza sativa	Macromolecule metabolism	Unclear	Molecular evidence: SSH, Northern blot and RT-PCR	0.176055	-0.242437	1.31719	0.922788
Traes_4DL_F8CEC5A40	LOC_Os03g51080.1	0	Oryza sativa	Macromolecule metabolism	Unclear	Molecular evidence: SSH, Northern blot and RT-PCR	-0.830065	-0.932529	0.543807	1.597
Traes_4DS_DAAEEC698	LOC_Os03g51080.1	0	Oryza sativa	Macromolecule metabolism	Unclear	Molecular evidence: SSH, Northern blot and RT-PCR	0.191837	-0.498562	0.679302	0.572631
Traes_1BL_FE986890F	LOC_Os05g49800.1	1e-85	Oryza sativa	Protein biosynthesis	Unclear	Molecular evidence: SSH, Northern blot and RT-PCR	0.38981	0.013113	-0.679796	-0.518061
Traes_2BS_C7E82EE7A	LOC_Os07g37250.1	E-140	Oryza sativa	Chlorophyll degradation	Promote	Genetic evidence:Mutant	-0.0872848	-0.0378877	0.869287	1.74713
Traes_7DS_C0D04B456	LOC_Os08g23710.1	E-138	Oryza sativa	Protein biosynthesis	Unclear	Molecular evidence: SSH, Northern blot and RT-PCR	0.439197	0.598269	-0.636876	-0.233847
Traes_5BL_F04D996B2	LOC_Os09g27030.2	E-116	Oryza sativa	Macromolecule metabolism	Unclear	Molecular evidence: SSH, Northern blot and RT-PCR	-0.0133347	0.0896511	0.877512	1.45464
Traes_5DL_AC7C885A0	LOC_Os09g27030.2	E-126	Oryza sativa	Macromolecule metabolism	Unclear	Molecular evidence: SSH, Northern blot and RT-PCR	0.180097	0.0809486	1.27993	2.14956
Traes_5AL_89F608111	LOC_Os11g05110.1	0	Oryza sativa	Macromolecule metabolism	Unclear	Molecular evidence: SSH, Northern blot and RT-PCR	-0.118873	0.271082	0.934921	0.860917
Traes_5AS_AC11F9C6B	LOC_Os12g41250.1	0	Oryza sativa	Lipid/Carbohydrate metabolism:Metabolic process	Unclear	Genetic evidence:Transgene	0.126589	0.429849	1.58437	2.40962
Traes_5BS_9E62F6722	LOC_Os12g41250.1	0	Oryza sativa	Lipid/Carbohydrate metabolism:Metabolic process	Unclear	Genetic evidence:Transgene	0.228374	0.182354	1.02506	1.6249
Traes_7AL_72A908F12	NM_001064128.1	0	Oryza sativa	Chlorophyll degradation	Promote	Genetic evidence:Mutant	0.756938	1.61124	4.63983	5.43301
Traes_7BL_314FA64E2	NM_001064128.1	E-140	Oryza sativa	Chlorophyll degradation	Promote	Genetic evidence:Mutant	0.751712	1.20508	4.02946	4.72957
Traes_7BL_BF02CF155	NM_001064128.1	2e-91	Oryza sativa	Chlorophyll degradation	Promote	Genetic evidence:Mutant	0.885635	1.50202	4.13508	4.93994
Traes_7DL_B7958BAA7	NM_001064128.1	0	Oryza sativa	Chlorophyll degradation	Promote	Genetic evidence:Mutant	0.716031	1.68413	4.77422	5.79157
Stress response
Traes_3B_14528E636	AC209784.3_FGT007	1e-92	Zea mays	Stress.abiotic.heat	Unclear	Genomic evidence:microarray data	-0.327615	1.00084	2.012	4.04392
Traes_3B_640F0220C	AC209784.3_FGT007	1e-46	Zea mays	Stress.abiotic.heat	Unclear	Genomic evidence:microarray data	-0.121164	1.76696	2.32604	4.76953
Traes_3B_8A1E91FC6	AC209784.3_FGT007	2e-29	Zea mays	Stress.abiotic.heat	Unclear	Genomic evidence:microarray data	-0.536202	0.974849	2.22532	4.8087
Traes_3B_D6F711ABC	AC209784.3_FGT007	3e-91	Zea mays	Stress.abiotic.heat	Unclear	Genomic evidence:microarray data	-0.597602	0.724871	1.83383	4.29353
Traes_4AL_603B6DC64	ACN41354.1	0	Triticum turgidum	Defense	Delay	Genetic evidence:Mutant	0.817073	-0.845962	-1.80769	-2.35914
Traes_7DL_D65B7D0F0	ACN41354.1	0	Triticum turgidum	Defense	Delay	Genetic evidence:Mutant	1.88896	-0.00497302	-0.437732	-1.34104
Traes_7DS_25B02BA46	ACN41354.1	0	Triticum turgidum	Defense	Delay	Genetic evidence:Mutant	0.440715	-0.23947	-1.20429	-2.30068
Traes_1AL_11AF18375	AJ310379.1	4e-67	Hordeum vulgare	Defense and cell rescue mechanisms	Promote	Molecular evidence:Northern	-0.519128	0.10038	0.996975	2.90974
Traes_2AS_D719EF149	AT1G27760.3	2e-86	Arabidopsis thaliana	Environmental factors:Salt	Unclear	Genomic evidence:microarray data	0.241406	0.990098	2.35508	1.46376
Traes_6BL_1F4D56EA7	AT1G77120.1	E-112	Arabidopsis thaliana	Defense	Unclear	Genomic evidence:microarray data	0.198625	0.0321264	-0.351245	-0.792379
Traes_6DL_FD8A6A45F	AT1G77120.1	E-136	Arabidopsis thaliana	Defense	Unclear	Genomic evidence:microarray data	0.162499	-0.104968	-0.682465	-0.893925
Traes_1AL_1EDE00B7B	AT2G38710.2	1e-89	Arabidopsis thaliana	Environmental factors:Salt	Unclear	Genomic evidence:microarray data	0.0632606	0.0672131	0.967132	1.45518
Traes_5AL_C46BF70B6	AT3G07700.2	0	Arabidopsis thaliana	Stress and detoxification	Unclear	Genomic evidence:microarray data	0.226001	0.926661	1.6417	2.39215
Traes_5BL_88B5FB55B	AT3G07700.2	0	Arabidopsis thaliana	Stress and detoxification	Unclear	Genomic evidence:microarray data	0.362508	1.01759	1.79094	2.57647
Traes_5DL_1A21D85BD	AT3G07700.2	0	Arabidopsis thaliana	Stress and detoxification	Unclear	Genomic evidence:microarray data	0.281656	0.921842	1.57412	2.31524
Traes_6AL_2722E6FD6	AT3G07700.2	2e-55	Arabidopsis thaliana	Stress and detoxification	Unclear	Genomic evidence:microarray data	0.245212	1.03345	0.143144	-1.58292
Traes_6DL_4F9522C09	AT3G07700.2	2e-56	Arabidopsis thaliana	Stress and detoxification	Unclear	Genomic evidence:microarray data	0.063349	0.841517	0.436365	-0.659139
Traes_1BL_EBAF41F1E	AT3G12580.1	1e-93	Arabidopsis thaliana	Stress and detoxification	Unclear	Genomic evidence:microarray data	-0.253802	2.14517	2.59637	3.81418
Traes_1DL_35433F5C5	AT3G12580.1	0	Arabidopsis thaliana	Stress and detoxification	Unclear	Genomic evidence:microarray data	-0.354363	1.41639	1.38162	2.5108
Traes_2BL_A6E213603	AT3G12580.1	0	Arabidopsis thaliana	Stress and detoxification	Unclear	Genomic evidence:microarray data	-0.399937	1.02539	1.27784	1.4966
Traes_4BL_4D370C9FA1	AT3G12580.1	0	Arabidopsis thaliana	Stress and detoxification	Unclear	Genomic evidence:microarray data	-1.80189	1.69755	1.55191	1.92926
Traes_4DS_B1A4FC5AD	AT3G12580.1	0	Arabidopsis thaliana	Stress and detoxification	Unclear	Genomic evidence:microarray data	-0.294595	1.12354	0.778911	1.43054
Traes_5AL_EE83D2709	AT3G12580.1	0	Arabidopsis thaliana	Stress and detoxification	Unclear	Genomic evidence:microarray data	-0.185762	1.17327	0.549411	-0.374691
Traes_6AL_E2CC7BB46	AT3G12580.1	0	Arabidopsis thaliana	Stress and detoxification	Unclear	Genomic evidence:microarray data	-0.470423	1.55346	1.59239	1.77058
Traes_6BL_B095FC217	AT3G12580.1	0	Arabidopsis thaliana	Stress and detoxification	Unclear	Genomic evidence:microarray data	-0.687218	1.2501	2.00241	2.08028
Traes_6DL_11374490D	AT3G12580.1	0	Arabidopsis thaliana	Stress and detoxification	Unclear	Genomic evidence:microarray data	-0.265146	1.93368	1.26219	2.00199
Traes_2DL_1827C450E	AT4G11600.1	2e-75	Arabidopsis thaliana	Detoxification	Unclear	Molecular evidence: SSH and Northern	0.113939	0.487487	1.78468	1.99765
Traes_6AL_6DB42F289	AT4G11600.1	8e-79	Arabidopsis thaliana	Detoxification	Unclear	Molecular evidence: SSH and Northern	0.263824	0.507558	1.39276	0.128693
Traes_6BL_8360C77EF	AT4G11600.1	1e-59	Arabidopsis thaliana	Detoxification	Unclear	Molecular evidence: SSH and Northern	-0.156353	1.17013	2.79352	1.08472
Traes_4AL_586359D761	AT4G11650.1	1e-72	Arabidopsis thaliana	Stress-induced gene	Unclear	Genomic evidence:microarray data	2.04094	1.67054	3.12887	2.75204
Traes_3B_ACB7AD56D	AT4G24220.1	E-135	Arabidopsis thaliana	Environmental factors:PCD	Unclear	Molecular evidence: SSH and Northern	0.14187	0.853149	2.09594	3.10084
Traes_3AL_EB20A52C8	AT4G24220.2	E-106	Arabidopsis thaliana	Environmental factors:PCD	Unclear	Molecular evidence: SSH and Northern	0.978372	3.79553	3.64797	5.67023
Traes_3B_3C59E6436	AT4G24220.2	E-136	Arabidopsis thaliana	Environmental factors:PCD	Unclear	Molecular evidence: SSH and Northern	0.0714811	3.87799	4.3449	6.35229
Traes_5AL_D01E0C753	AT5G01600.1	3e-52	Arabidopsis thaliana	Detoxification	Unclear	Molecular evidence: SSH and Northern	-0.0063083	0.423708	0.677275	1.50104
Traes_2DS_3B16D8173	AT5G52640.1	0	Arabidopsis thaliana	Stress and detoxification	Unclear	Genomic evidence:microarray data	0.589329	-1.52898	-0.114533	4.75866
Traes_5AL_0C2D144B0	AT5G52640.1	0	Arabidopsis thaliana	Stress and detoxification	Unclear	Genomic evidence:microarray data	-0.0801818	0.912528	0.91231	1.28501
Traes_5BS_AB86BB5DE	AT5G52640.1	E-165	Arabidopsis thaliana	Stress and detoxification	Unclear	Genomic evidence:microarray data	0.277247	1.3686	-0.318674	0.226743
Traes_7AS_76670DCAB	AT5G52640.1	0	Arabidopsis thaliana	Stress and detoxification	Unclear	Genomic evidence:microarray data	-0.375737	1.17032	0.766095	1.12326
Traes_7BS_1A6D16C6B	AT5G52640.1	0	Arabidopsis thaliana	Stress and detoxification	Unclear	Genomic evidence:microarray data	-0.120028	1.38999	0.817378	1.11163
Novel05672	GRMZM2G310431_T01	2e-59	Zea mays	Stress.abiotic.heat	Unclear	Genomic evidence:microarray data	0.534101	-1.33236	-1.19693	-0.837899
Traes_1AL_657856E06	GRMZM2G310431_T01	2e-75	Zea mays	Stress.abiotic.heat	Unclear	Genomic evidence:microarray data	0.887881	-1.39374	1.1613	1.78814
Traes_1AL_CA2AFD745	GRMZM2G310431_T01	3e-84	Zea mays	Stress.abiotic.heat	Unclear	Genomic evidence:microarray data	1.10534	-0.243081	1.2303	2.71174
Traes_1BL_ACE9E7BF8	GRMZM2G310431_T01	4e-58	Zea mays	Stress.abiotic.heat	Unclear	Genomic evidence:microarray data	1.03753	-0.701394	1.16656	2.26508
Traes_1DL_645A2ECC0	GRMZM2G310431_T01	3e-90	Zea mays	Stress.abiotic.heat	Unclear	Genomic evidence:microarray data	0.441279	0.755603	1.76865	0.526303
Traes_2AL_85270A404	GRMZM2G310431_T01	5e-74	Zea mays	Stress.abiotic.heat	Unclear	Genomic evidence:microarray data	-0.544458	-0.496741	-2.9669	-3.30774
Traes_2BL_F3D782EF8	GRMZM2G310431_T01	3e-73	Zea mays	Stress.abiotic.heat	Unclear	Genomic evidence:microarray data	-0.379752	-0.51258	-1.10574	-2.39781
Traes_2DL_217C5814F	GRMZM2G310431_T01	1e-73	Zea mays	Stress.abiotic.heat	Unclear	Genomic evidence:microarray data	-0.559133	-1.5556	-2.33902	-3.29117
Traes_5DL_F71758B66	GSMUA_Achr2T13220_001	1e-63	Musa acuminata	Stress	Unclear	Molecular evidence:RNA sequencing	1.60073	-0.8769	1.8523	2.56844
Traes_5BL_E0E3EC75D	GSMUA_Achr2T13240_001	3e-58	Musa acuminata	Stress	Unclear	Molecular evidence:RNA sequencing	1.82432	0.370031	1.61	0.626626
Traes_5DL_43D95A3FE	GSMUA_Achr2T13240_001	1e-59	Musa acuminata	Stress	Unclear	Molecular evidence:RNA sequencing	2.18575	0.430442	2.01646	0.46852
Traes_5DL_BABD13074	GSMUA_Achr2T13240_001	1e-59	Musa acuminata	Stress	Unclear	Molecular evidence:RNA sequencing	2.13946	-1.10459	2.0971	2.17831
Traes_1AL_EF7E5EF10	GSMUA_Achr5T01450_001	E-152	Musa acuminata	Stress	Unclear	Molecular evidence:RNA sequencing	0.818428	-0.447019	-0.93335	-1.74342
Traes_2AS_1FC67C1BD	GSMUA_Achr5T01450_001	E-146	Musa acuminata	Stress	Unclear	Molecular evidence:RNA sequencing	1.2084	-2.27501	-2.41115	-0.716855
Traes_6AS_FB1588C01	GSMUA_Achr5T01450_001	E-120	Musa acuminata	Stress	Unclear	Molecular evidence:RNA sequencing	-0.195599	-0.368801	-1.16981	-1.7936
Traes_6BS_69C33B7B0	GSMUA_Achr5T01450_001	2e-85	Musa acuminata	Stress	Unclear	Molecular evidence:RNA sequencing	-0.121164	-0.651141	-1.42061	-2.0907
Traes_6DS_87DB9A2F3	GSMUA_Achr5T01450_001	E-120	Musa acuminata	Stress	Unclear	Molecular evidence:RNA sequencing	-0.154965	0.174502	-0.643004	-1.55017
Traes_2BL_B51F2BBE0	GSMUA_AchrUn_randomT06190_001	5e-81	Musa acuminata	Oxidative stress	Unclear	Molecular evidence:RNA sequencing	0.159464	-0.0502033	0.306246	1.39071
Traes_5AL_671C7A3EE	LOC_Os01g55650.1	0	Oryza sativa	Pathogenicity and stress	Unclear	Molecular evidence: SSH/Northern blot/RT-PCR	0.390549	0.481697	2.01842	2.66027
Traes_5DL_666BAC2B8	LOC_Os01g55650.1	0	Oryza sativa	Pathogenicity and stress	Unclear	Molecular evidence: SSH/Northern blot/RT-PCR	-0.0984439	0.00483717	1.42389	2.30039
Traes_4AL_E2BAAEFF5	LOC_Os07g30970.1	1e-75	Oryza sativa	Pathogenicity and stress	Unclear	Molecular evidence: SSH/Northern blot/RT-PCR	0.523823	1.01292	1.18459	2.09193
Traes_5DS_922F3F6EA	LOC_Os07g30970.1	2e-54	Oryza sativa	Pathogenicity and stress	Unclear	Molecular evidence: SSH/Northern blot/RT-PCR	0.444088	-0.313807	-0.93246	-1.10218
Traes_2AS_007D8F7BD	LOC_Os07g49400.1	E-131	Oryza sativa	Detoxification	Unclear	Molecular evidence: SSH/Northern blot/RT-PCR	-0.11594	1.19168	1.08047	1.38817
Traes_2BS_2453C5E6B	LOC_Os07g49400.1	2e-69	Oryza sativa	Detoxification	Unclear	Molecular evidence: SSH/Northern blot/RT-PCR	-0.119288	0.997399	0.76819	1.48754
Traes_2DS_5AA2EEDB7	LOC_Os07g49400.1	E-132	Oryza sativa	Detoxification	Unclear	Molecular evidence: SSH/Northern blot/RT-PCR	-0.0912077	1.43628	1.11313	1.84301
Traes_4DL_8CE055F15	LOC_Os07g49400.1	E-120	Oryza sativa	Detoxification	Unclear	Molecular evidence: SSH/Northern blot/RT-PCR	0.167613	0.189856	0.452364	1.30871
Traes_7AS_9E1AC3FE6	LOC_Os10g41930.1	3e-78	Oryza sativa	Stress	Unclear	Molecular evidence: SSH/Northern blot/RT-PCR	-0.0249487	0.868333	2.84055	2.17097
Traes_7DS_5547E3F22	LOC_Os10g41930.1	5e-77	Oryza sativa	Stress	Unclear	Molecular evidence: SSH/Northern blot/RT-PCR	0.0349552	0.260604	3.20533	2.07174
Hormone and Signal transduction
Traes_1AS_C7E294E15	AF031241.1	E-156	Glycine max	Signal transduction:Molecular chaperone	Delay	Genetic evidence:Transgene	0.173868	-0.14727	-0.760326	-0.700997
Traes_5AL_629EDDFC3	AF031241.1	E-157	Glycine max	Signal transduction:Molecular chaperone	Delay	Genetic evidence:Transgene	0.0548591	1.23431	1.21773	1.55356
Traes_5BL_D8D745F37	AF031241.1	E-159	Glycine max	Signal transduction:Molecular chaperone	Delay	Genetic evidence:Transgene	0.319229	1.318	1.35471	1.79193
Traes_6AS_236AF32FD	AF031241.1	0	Glycine max	Signal transduction:Molecular chaperone	Delay	Genetic evidence:Transgene	0.614322	1.86427	1.85166	3.07837
Traes_6DS_A593093E1	AF031241.1	0	Glycine max	Signal transduction:Molecular chaperone	Delay	Genetic evidence:Transgene	0.458208	1.71215	1.46879	2.45941
Traes_7AS_9932F88F6	AJ000728.2	E-134	Lycopersicon esculentum	Signal transduction	Unclear	Molecular evidence	0.190828	-0.878552	-1.56852	-2.42738
Traes_1BS_4F863C0A0	AT1G05010.1	3e-65	Arabidopsis thaliana	Hormone response pathway:ET	Unclear	Genomic evidence:microarray data	0.118855	-1.3137	-0.0370907	0.476868
Traes_2BL_9796D51EE	AT1G11410.1	E-168	Arabidopsis thaliana	Signal transduction	Unclear	Genomic evidence:microarray data	0.0648729	1.04625	2.15828	2.54195
Traes_6BL_7D54627BB	AT1G11410.1	E-107	Arabidopsis thaliana	Signal transduction	Unclear	Genomic evidence:microarray data	0.82154	1.48125	3.17359	3.324
Traes_6DL_2EC28BCDA	AT1G11410.1	E-106	Arabidopsis thaliana	Signal transduction	Unclear	Genomic evidence:microarray data	1.09377	0.39506	2.40123	2.35451
Traes_5AS_44322BC0E	AT1G11680.1	E-133	Arabidopsis thaliana	Hormone response pathway:ET and terol biosynthesis	Delay	Genetic evidence:Mutant	1.20062	-1.10968	0.785731	3.28125
Traes_5AS_A24A8BA32	AT1G11680.1	E-107	Arabidopsis thaliana	Hormone response pathway:ET and terol biosynthesis	Delay	Genetic evidence:Mutant	0.637527	1.23724	2.63485	5.98501
Traes_5AS_BD073D445	AT1G11680.1	E-128	Arabidopsis thaliana	Hormone response pathway:ET and terol biosynthesis	Delay	Genetic evidence:Mutant	1.39539	0.837446	2.32362	3.51469
Traes_5DS_46237B176	AT1G11680.1	E-125	Arabidopsis thaliana	Hormone response pathway:ET and terol biosynthesis	Delay	Genetic evidence:Mutant	1.30716	0.743973	2.5383	3.10087
Traes_5DS_E7FDA5B26	AT1G11680.1	E-121	Arabidopsis thaliana	Hormone response pathway:ET and terol biosynthesis	Delay	Genetic evidence:Mutant	1.05865	-1.33109	0.514792	2.65284
Traes_7BL_42058F58F	AT1G11680.1	E-127	Arabidopsis thaliana	Hormone response pathway:ET and terol biosynthesis	Delay	Genetic evidence:Mutant	1.16682	5.19651	6.59018	8.99705
Traes_1AS_A2C4350B8	AT1G12010.1	5e-72	Arabidopsis thaliana	Hormone response pathway:ET	Unclear	Genomic evidence:microarray data	-0.0649233	-2.76557	-1.90667	-1.50308
Traes_1AS_C2D84E4F8	AT1G12010.1	4e-73	Arabidopsis thaliana	Hormone response pathway:ET	Unclear	Genomic evidence:microarray data	0.139261	-1.42997	-0.756093	-0.2574
Traes_1BS_C428DA20B	AT1G12010.1	1e-66	Arabidopsis thaliana	Hormone response pathway:ET	Unclear	Genomic evidence:microarray data	0.0128129	-3.25618	-2.1167	-1.37998
Traes_1DS_3463BE1BB	AT1G12010.1	4e-67	Arabidopsis thaliana	Hormone response pathway:ET	Unclear	Genomic evidence:microarray data	-0.109423	-2.46645	-2.32661	-1.58903
Traes_1AS_EF9022F0F	AT1G12820.1	3e-83	Arabidopsis thaliana	Hormone response pathway:Auxin	Unclear	Genomic evidence:microarray data	0.478774	1.46714	2.54115	3.80425
Traes_1DS_1847DA30E	AT1G12820.1	E-142	Arabidopsis thaliana	Hormone response pathway:Auxin	Unclear	Genomic evidence:microarray data	0.328421	1.09738	1.59615	2.27246
Traes_3B_D8B3F965A	AT1G12820.1	1e-78	Arabidopsis thaliana	Hormone response pathway:Auxin	Unclear	Genomic evidence:microarray data	-0.31013	-0.336744	0.798468	0.407677
Traes_6DL_BDDF27A65	AT1G13280.1	5e-67	Arabidopsis thaliana	Hormone response pathway:JA	Unclear	Genomic evidence:microarray data	0.0696469	-0.310622	1.43861	2.5601
Traes_4AL_27C235951	AT1G15310.1	4e-53	Arabidopsis thaliana	Signal transduction	Unclear	Genomic evidence:microarray data	0.11696	-0.378679	-0.366167	-1.23322
Traes_4AS_CDDD2DCAB	AT1G17340.1	E-179	Arabidopsis thaliana	Signal transduction	Unclear	Genomic evidence:microarray data	0.155813	0.0084839	1.24727	1.93563
Traes_4BL_1B956BDC2	AT1G17340.1	E-179	Arabidopsis thaliana	Signal transduction	Unclear	Genomic evidence:microarray data	0.102289	0.437004	1.68537	1.73216
Traes_4DL_BA847FEC5	AT1G17340.1	E-179	Arabidopsis thaliana	Signal transduction	Unclear	Genomic evidence:microarray data	0.25188	-0.058888	0.940164	1.04461
Traes_3AS_47DAFFD83	AT1G22770.1	0	Arabidopsis thaliana	Signal transduction	Unclear	Genomic evidence:microarray data	0.252469	0.717323	1.98984	1.9291
Traes_3B_5F7FFAC8C	AT1G22770.1	2e-75	Arabidopsis thaliana	Signal transduction	Unclear	Genomic evidence:microarray data	0.287214	0.740022	2.06482	1.90111
Traes_3B_A90EC49F7	AT1G22770.1	0	Arabidopsis thaliana	Signal transduction	Unclear	Genomic evidence:microarray data	0.202065	0.838837	2.10145	1.86378
Traes_3DS_65BB825BC	AT1G22770.1	E-162	Arabidopsis thaliana	Signal transduction	Unclear	Genomic evidence:microarray data	0.315429	0.721786	2.09466	1.75381
Traes_3DS_71052A06E	AT1G22770.1	0	Arabidopsis thaliana	Signal transduction	Unclear	Genomic evidence:microarray data	0.0650715	0.578871	2.0186	1.63173
Traes_2AL_FE8343438	AT1G22930.1	0	Arabidopsis thaliana	Signal transduction	Unclear	Genomic evidence:microarray data	-0.190004	0.54759	0.683396	1.88159
Traes_2DL_D7B13B5E7	AT1G22930.1	0	Arabidopsis thaliana	Signal transduction	Unclear	Genomic evidence:microarray data	-0.121704	0.17559	-0.469325	0.891884
Traes_3AL_A91F0938A	AT1G27320.1	0	Arabidopsis thaliana	Hormone response pathway:CK	Delay	Genetic evidence:Mutant	-0.0731746	0.310172	1.21402	1.57222
Traes_3B_91AC06652	AT1G27320.1	0	Arabidopsis thaliana	Hormone response pathway:CK	Delay	Genetic evidence:Mutant	0.0257879	0.689423	1.04082	1.62023
Traes_3DL_DB4F4CB29	AT1G27320.1	0	Arabidopsis thaliana	Hormone response pathway:CK	Delay	Genetic evidence:Mutant	-0.0902734	0.811281	1.47686	2.05224
Traes_7BL_17313A070	AT1G29800.2	E-166	Arabidopsis thaliana	Signal transduction	Unclear	Genomic evidence:microarray data	-0.180995	0.161471	0.77311	1.66975
Traes_7DL_C39B4A1C4	AT1G29800.2	E-166	Arabidopsis thaliana	Signal transduction	Unclear	Genomic evidence:microarray data	-0.0823753	-0.0684584	0.521545	1.59394
Traes_2DL_2BA772DB5	AT1G30270.1	0	Arabidopsis thaliana	Signal transduction	Unclear	Genomic evidence:microarray data	0.274981	-1.08026	1.58653	-0.395041
Traes_5AL_256BEC5B9	AT1G30270.1	E-155	Arabidopsis thaliana	Signal transduction	Unclear	Genomic evidence:microarray data	-0.449877	-0.479384	-1.7664	-1.1053
Traes_4AL_CB2996256	AT1G47510.1	E-103	Arabidopsis thaliana	Signal transduction	Unclear	Genomic evidence:microarray data	0.635442	2.60499	2.9006	4.36621
Traes_3B_F880EDE81	AT1G51950.1	4e-40	Arabidopsis thaliana	Hormone response pathway:Auxin	Unclear	Genomic evidence:microarray data	-0.286941	-2.60081	0.545287	2.86433
Traes_2AS_128CFF290	AT1G54130.1	E-164	Arabidopsis thaliana	Signal transduction	Unclear	Genomic evidence:microarray data	0.386696	0.61786	2.0586	3.64659
Traes_2BL_1AED96909	AT1G59750.2	0	Arabidopsis thaliana	Hormone response pathway:Auxin	Promote	Genetic evidence:Mutant; Genomic evidence:microarray data	0.2369	-0.867948	-0.974781	-1.08313
Traes_7AS_EBD5F1F54	AT1G65480.1	4e-75	Arabidopsis thaliana	Signal transduction:Flowering	Promote	Genetic evidence:Transgene	-0.131385	-0.459704	-2.94745	-4.20953
Traes_7DS_12C14942B	AT1G65480.1	2e-65	Arabidopsis thaliana	Signal transduction:Flowering	Promote	Genetic evidence:Transgene	0.0491262	0.511819	-0.430305	-0.64319
Traes_6DS_016F70618	AT1G66330.1	6e-67	Arabidopsis thaliana	Hormone response pathway:ET	Promote	Genetic evidence:Mutant	-0.141235	0.699706	0.245452	-1.14408
Traes_3B_0BA89B2AC	AT1G75450.1	E-146	Arabidopsis thaliana	Hormone response pathway:CK	Unclear	Genomic evidence:microarray data	0.231888	-1.43065	-3.40711	-5.02383
Traes_2AL_5820BAF68	AT1G76680.1	E-161	Arabidopsis thaliana	Hormone response pathway:SA	Unclear	Molecular evidence:Northern	0.679666	-0.995891	0.348356	1.40849
Traes_7DL_61B099A91	AT2G06050.1	E-132	Arabidopsis thaliana	Hormone response pathway:JA	Unclear	Genomic evidence:microarray data	0.00219286	-0.0186996	0.71541	1.93734
Traes_3B_C5B9970E9	AT2G16430.1	E-149	Arabidopsis thaliana	Signal transduction	Unclear	Genomic evidence:microarray data	-0.0917455	-1.3717	2.08285	0.093145
Traes_3DL_19CC0F025	AT2G16430.1	2e-39	Arabidopsis thaliana	Signal transduction	Unclear	Genomic evidence:microarray data	0.333891	-0.363022	3.60759	1.58902
Traes_3AL_A80817DFD	AT2G16430.2	E-162	Arabidopsis thaliana	Signal transduction	Unclear	Genomic evidence:microarray data	0.300287	-0.539387	4.03882	2.61926
Traes_3DL_60150F547	AT2G16430.2	E-107	Arabidopsis thaliana	Signal transduction	Unclear	Genomic evidence:microarray data	0.761111	-0.15216	3.53572	1.61338
Traes_5BL_35B45515F	AT2G16430.2	0	Arabidopsis thaliana	Signal transduction	Unclear	Genomic evidence:microarray data	0.173672	-0.862923	-0.259302	-1.72884
Novel07733	AT2G17290.1	0	Arabidopsis thaliana	Signal transduction:Calcium	Unclear	Genomic evidence:microarray data	0.471051	-1.12041	-1.71992	-0.82142
Traes_4AL_D787CF1CC	AT2G17290.1	0	Arabidopsis thaliana	Signal transduction:Calcium	Unclear	Genomic evidence:microarray data	0.959212	-0.36933	-0.807626	-0.773758
Traes_6AS_CE8BAAE7A	AT2G17290.1	E-101	Arabidopsis thaliana	Signal transduction:Calcium	Unclear	Genomic evidence:microarray data	0.624939	-1.2728	-1.83813	-0.941204
Traes_6BS_814D20B55	AT2G17290.1	2e-98	Arabidopsis thaliana	Signal transduction:Calcium	Unclear	Genomic evidence:microarray data	0.541427	-1.54863	-1.85245	-0.744748
Traes_4BL_F34EBD618	AT2G27050.1	E-127	Arabidopsis thaliana	Hormone response pathway:ET	Promote	Genetic evidence:Transgene	0.194199	-0.483033	0.27191	0.608644
Traes_6AL_E300E5DDF	AT2G33150.1	E-138	Arabidopsis thaliana	Hormone response pathway:JA	Promote	Genetic evidence:Mutant	0.187377	0.480617	1.62076	2.03465
Traes_6BL_54182EEB2	AT2G33150.1	E-160	Arabidopsis thaliana	Hormone response pathway:JA	Promote	Genetic evidence:Mutant	0.233028	0.59691	2.15543	2.77451
Traes_6DL_7960654CF	AT2G33150.1	0	Arabidopsis thaliana	Hormone response pathway:JA	Promote	Genetic evidence:Mutant	0.213583	0.482328	1.83575	2.63234
Traes_2AL_52C4B6996	AT2G33380.1	4e-68	Arabidopsis thaliana	Signal transduction:Calcium	Unclear	Genomic evidence:microarray data	0.0177948	0.591158	1.31765	2.79104
Traes_2AL_6A8D574C4	AT2G33380.1	1e-84	Arabidopsis thaliana	Signal transduction:Calcium	Unclear	Genomic evidence:microarray data	0.486436	2.96434	6.42392	7.9254
Traes_2BL_5880DAAC3	AT2G33380.1	2e-86	Arabidopsis thaliana	Signal transduction:Calcium	Unclear	Genomic evidence:microarray data	-0.918241	2.23147	6.94255	9.11257
Traes_2DL_00618F315	AT2G33380.1	8e-86	Arabidopsis thaliana	Signal transduction:Calcium	Unclear	Genomic evidence:microarray data	-0.805915	2.16978	6.54674	9.38933
Traes_2DL_7E9061D5D	AT2G33380.1	5e-85	Arabidopsis thaliana	Signal transduction:Calcium	Unclear	Genomic evidence:microarray data	1.07944	2.25975	5.30171	6.48994
Traes_3B_C0FA00AC4	AT2G38120.1	0	Arabidopsis thaliana	Hormone response pathway:Auxin	Delay	Genetic evidence:Mutant	-0.316714	-0.803623	-2.33677	-2.49454
Traes_4AS_5015DF7A2	AT2G43790.1	E-163	Arabidopsis thaliana	Signal transduction:MKK cascade	Promote	Genetic evidence:Mutant	-0.0666003	-1.7171	-1.55833	-0.620262
Traes_7BL_992E1F443	AT2G43790.1	1e-81	Arabidopsis thaliana	Signal transduction:MKK cascade	Promote	Genetic evidence:Mutant	0.198007	-1.86388	-2.09146	-1.65241
Traes_7DL_FB75EA9C3	AT2G43790.1	9e-93	Arabidopsis thaliana	Signal transduction:MKK cascade	Promote	Genetic evidence:Mutant	0.259387	-1.67639	-1.99869	-1.59749
Traes_4DS_5AAF38D73	AT3G06620.1	0	Arabidopsis thaliana	Signal transduction	Unclear	Genomic evidence:microarray data	0.497585	0.186324	1.66868	2.85778
Traes_2AS_E796AA6BA	AT3G06850.2	E-141	Arabidopsis thaliana	Signal transduction:Light	Unclear	Genomic evidence:microarray data	0.113586	-0.0283035	1.50491	2.35572
Traes_2DS_F43C1EB35	AT3G06850.2	E-142	Arabidopsis thaliana	Signal transduction:Light	Unclear	Genomic evidence:microarray data	0.0824939	-0.393783	0.878838	2.50894
Traes_4BS_8A9AB17E3	AT3G12080.1	0	Arabidopsis thaliana	Signal transduction:GTP binding	Unclear	Genomic evidence:microarray data	0.198062	-0.0139481	-0.979559	-1.89874
Traes_4DS_9BF8E73E5	AT3G12080.1	0	Arabidopsis thaliana	Signal transduction:GTP binding	Unclear	Genomic evidence:microarray data	0.174608	-0.090423	-0.906162	-1.44081
Traes_4AS_5A4EAD2EC	AT3G12080.2	0	Arabidopsis thaliana	Signal transduction:GTP binding	Unclear	Genomic evidence:microarray data	0.0802901	-0.166459	-0.534005	-1.65894
Traes_5AL_1124A4A10	AT3G14050.1	E-143	Arabidopsis thaliana	Signal transduction	Unclear	Genomic evidence:microarray data	0.382564	0.0237688	1.06569	2.18199
Traes_5BL_B291D258F	AT3G14050.1	E-173	Arabidopsis thaliana	Signal transduction	Unclear	Genomic evidence:microarray data	0.457327	0.0056498	0.665507	2.23651
Traes_5DL_D4DB081FF	AT3G14050.1	E-172	Arabidopsis thaliana	Signal transduction	Unclear	Genomic evidence:microarray data	0.102656	-0.565078	0.276604	1.94449
Traes_4AS_2BDA1260C	AT3G20770.1	E-138	Arabidopsis thaliana	Hormone response pathway:ET	Promote	Genetic evidence:Mutant	-0.0984152	-0.702235	-0.178811	0.448327
Traes_6AS_2E324E361	AT3G45140.1	0	Arabidopsis thaliana	Hormone response pathway:JA	Promote	Molecular evidence:Northern	0.270745	-0.516469	0.527253	0.599629
Traes_6DS_7CA5A8F12	AT3G45140.1	0	Arabidopsis thaliana	Hormone response pathway:JA	Promote	Molecular evidence:Northern	0.29023	-0.254169	0.629356	0.943452
Traes_1AL_762E8A7A2	AT3G46060.2	4e-92	Arabidopsis thaliana	Hormone response pathway	Unclear	Genomic evidence:microarray data	0.0593603	0.565529	0.843467	1.22955
Traes_1DL_97C6E468E	AT3G46060.2	2e-92	Arabidopsis thaliana	Hormone response pathway	Unclear	Genomic evidence:microarray data	-0.0756002	0.617135	0.997152	1.25327
Traes_6AS_101337AE9	AT3G47450.2	E-176	Arabidopsis thaliana	Hormone response pathway:Nitric oxide	Delay	Genetic evidence:Mutant	0.341956	-0.258759	-1.34761	-1.68718
Traes_6DS_AF55223AE	AT3G47450.2	E-174	Arabidopsis thaliana	Hormone response pathway:Nitric oxide	Delay	Genetic evidence:Mutant	0.287202	-0.24356	-1.54893	-1.64399
Traes_2AS_0B6508FD5	AT3G57540.1	4e-53	Arabidopsis thaliana	Signal transduction	Unclear	Genomic evidence:microarray data	0.436861	-0.751719	-1.01404	-3.51332
Traes_2BS_4FF3C8289	AT3G57540.1	5e-55	Arabidopsis thaliana	Signal transduction	Unclear	Genomic evidence:microarray data	0.304762	-0.760662	-0.584991	-2.49505
Traes_2DS_AC92A08E0	AT3G57540.1	1e-54	Arabidopsis thaliana	Signal transduction	Unclear	Genomic evidence:microarray data	0.306727	-1.50781	-2.07798	-3.92248
Traes_3DS_FB1CE2622	AT3G62560.1	2e-72	Arabidopsis thaliana	Signal transduction	Unclear	Genomic evidence:microarray data	0.24456	1.4126	1.49351	1.88339
Novel03527	AT4G03280.1	6e-87	Arabidopsis thaliana	Light signal	Unclear	Molecular evidence: SSH and Northern	-0.268242	-0.39829	-0.605346	-1.55266
Traes_2BS_926E8FE94	AT4G03280.1	1e-86	Arabidopsis thaliana	Light signal	Unclear	Molecular evidence: SSH and Northern	-0.219429	-0.275549	-0.408434	-1.36289
Traes_5DL_683AE36C9	AT4G05530.1	7e-94	Arabidopsis thaliana	Signal transduction	Unclear	Genomic evidence:microarray data	0.187951	0.252508	1.34935	1.89963
Traes_2AL_A47310DDA	AT4G17170.1	E-100	Arabidopsis thaliana	Signal transduction	Unclear	Genomic evidence:microarray data	-0.108462	0.245152	0.935012	1.89798
Traes_2BL_2A98E7B29	AT4G17170.1	E-110	Arabidopsis thaliana	Signal transduction	Unclear	Genomic evidence:microarray data	-0.112921	0.60615	1.17334	1.9191
Traes_2DL_D17DCB9CB	AT4G17170.1	E-100	Arabidopsis thaliana	Signal transduction	Unclear	Genomic evidence:microarray data	0.161867	0.494232	1.03065	1.59304
Traes_6DL_53A9BA9CD	AT4G17170.1	E-100	Arabidopsis thaliana	Signal transduction	Unclear	Genomic evidence:microarray data	0.0228206	0.263217	1.31712	1.88861
Traes_5DS_503F10289	AT4G19640.1	3e-82	Arabidopsis thaliana	Signal transduction	Unclear	Genomic evidence:microarray data	0.172125	0.572024	1.03845	1.35217
Traes_1AL_C87568D4D	AT4G26080.1	2e-53	Arabidopsis thaliana	Hormone response pathway:ABA	Unclear	Genomic evidence:microarray data	0.0700216	2.04376	2.64076	2.77114
Traes_4BL_DF4B64629	AT4G30600.1	0	Arabidopsis thaliana	Signal transduction	Unclear	Genomic evidence:microarray data	0.267547	-0.398569	0.670302	0.530139
Traes_4AL_4AA1E32A0	AT4G33090.1	E-169	Arabidopsis thaliana	Hormone response pathway	Unclear	Genomic evidence:microarray data	0.309387	0.618226	1.27378	1.55463
Traes_4BS_A834E1175	AT4G33090.1	0	Arabidopsis thaliana	Hormone response pathway	Unclear	Genomic evidence:microarray data	0.288498	0.595961	1.3658	1.81839
Traes_4DS_3CD86327C	AT4G33090.1	0	Arabidopsis thaliana	Hormone response pathway	Unclear	Genomic evidence:microarray data	0.399191	0.651863	1.3906	1.71889
Traes_6AS_ADCD6AB01	AT4G33090.1	0	Arabidopsis thaliana	Hormone response pathway	Unclear	Genomic evidence:microarray data	0.445955	0.68343	1.34305	2.42351
Traes_6BS_8C5C8E9E2	AT4G33090.1	0	Arabidopsis thaliana	Hormone response pathway	Unclear	Genomic evidence:microarray data	0.294451	0.733426	1.42374	2.38404
Traes_6DS_CDCAD6797	AT4G33090.1	0	Arabidopsis thaliana	Hormone response pathway	Unclear	Genomic evidence:microarray data	0.320079	0.744244	1.55286	2.69574
Traes_4BS_4BCA03A6C	AT5G02810.1	8e-57	Arabidopsis thaliana	Hormone response pathway:ABA	Unclear	Genomic evidence:microarray data	-0.078934	-0.301098	0.742723	0.668836
Traes_5BL_72CF62D05	AT5G19140.1	5e-58	Arabidopsis thaliana	Hormone response pathway	Unclear	Genomic evidence:microarray data	-0.132241	0.649844	0.29215	-0.5728
Traes_7BL_91C7CD5C5	AT5G20010.1	E-110	Arabidopsis thaliana	Signal transduction	Unclear	Genomic evidence:microarray data	-0.224064	0.107992	1.90445	2.40133
Traes_7DL_C8D5535E3	AT5G20010.1	E-110	Arabidopsis thaliana	Signal transduction	Unclear	Genomic evidence:microarray data	-0.220441	0.0463193	1.74856	2.00031
Traes_2DS_C566FF97E	AT5G20150.1	1e-20	Arabidopsis thaliana	Signal transduction	Unclear	Genomic evidence:microarray data	-1.27562	-0.402368	5.55079	2.45551
Traes_7AL_2D8B863A7	AT5G20150.1	2e-52	Arabidopsis thaliana	Signal transduction	Unclear	Genomic evidence:microarray data	0.193941	-1.15248	3.49905	0.859405
Traes_7BL_DD88849AE	AT5G20150.1	3e-68	Arabidopsis thaliana	Signal transduction	Unclear	Genomic evidence:microarray data	-0.0377494	-0.31625	3.20077	1.07083
Traes_5BL_1430C137A	AT5G20960.2	0	Arabidopsis thaliana	Hormone response pathway:Auxin	Unclear	Genomic evidence:microarray data	1.089	0.458571	1.12387	-0.437945
Traes_7DL_9A293EA4D	AT5G20960.2	0	Arabidopsis thaliana	Hormone response pathway:Auxin	Unclear	Genomic evidence:microarray data	-0.828956	0.351355	2.04943	4.71372
Traes_2AL_47B1A5BF2	AT5G23750.1	3e-60	Arabidopsis thaliana	Signal transduction	Unclear	Genomic evidence:microarray data	0.141345	0.392073	1.18351	1.42966
Traes_1AL_48FDAC1B3	AT5G48380.1	0	Arabidopsis thaliana	Signal transduction:Protein kinase	Unclear	Molecular evidence: SSH and Northern	0.111629	-0.591338	-0.529165	-1.01555
Traes_1DL_A17D0D20B	AT5G48380.1	0	Arabidopsis thaliana	Signal transduction:Protein kinase	Unclear	Molecular evidence: SSH and Northern	0.167325	-0.850171	-1.23883	-1.10237
Traes_1AL_81A6723C9	AT5G54680.1	1e-25	Arabidopsis thaliana	Hormone response pathway	Unclear	Genomic evidence:microarray data	0.11068	1.22053	2.20085	2.376
Traes_3DL_71815C593	AT5G63970.2	E-119	Arabidopsis thaliana	Signal transduction:Calcium	Unclear	Genomic evidence:microarray data	-0.203763	-1.99005	0.0188589	0.722015
Traes_2BS_2A2CD501C	GSMUA_Achr10T05370_001	E-154	Musa acuminata	Signal transduction	Unclear	Molecular evidence:RNA sequencing	0.742521	1.91576	2.93116	2.83488
Traes_1BS_FA0EFB1B8	GSMUA_Achr1T18250_001	1e-66	Musa acuminata	Hormone metabolism	Unclear	Molecular evidence:RNA sequencing	0.182635	-1.33484	-0.0789865	0.706997
Traes_1DS_26E6C748F	GSMUA_Achr1T18250_001	1e-66	Musa acuminata	Hormone metabolism	Unclear	Molecular evidence:RNA sequencing	-0.113811	-1.95179	-1.91894	-1.00658
Traes_5BL_88D1A0D5E	GSMUA_Achr1T18250_001	E-127	Musa acuminata	Hormone metabolism	Unclear	Molecular evidence:RNA sequencing	-1.07346	-3.70417	-4.5726	-4.94837
Traes_6AL_1F81F2854	GSMUA_Achr1T18250_001	4e-91	Musa acuminata	Hormone metabolism	Unclear	Molecular evidence:RNA sequencing	-0.48115	-0.792377	-5.84737	-5.39278
Traes_7DL_BA070550D	GSMUA_Achr2T02460_001	E-166	Musa acuminata	Signal transduction	Unclear	Molecular evidence:RNA sequencing	0.230738	0.874087	-0.152651	-0.657113
Novel02720	GSMUA_Achr2T21610_001	7e-71	Musa acuminata	Signal transduction	Unclear	Molecular evidence:RNA sequencing	-0.26419	-0.319071	0.467367	3.12221
Traes_3B_C71B31578	GSMUA_Achr3T06260_001	0	Musa acuminata	Signal transduction	Unclear	Molecular evidence:RNA sequencing	-0.231645	0.890948	0.892645	1.9561
Traes_3B_7ABEA6AAD	GSMUA_Achr4T15110_001	E-120	Musa acuminata	Hormone metabolism	Unclear	Molecular evidence:RNA sequencing	0.114708	1.35528	3.78208	5.43176
Traes_1BS_84EDDA66B	GSMUA_Achr6T04800_001	E-136	Musa acuminata	Signal transduction	Unclear	Molecular evidence:RNA sequencing	-0.131907	0.511039	-1.92011	-1.67184
Traes_6AS_0F0809F96	GSMUA_Achr6T13520_001	E-121	Musa acuminata	Hormone metabolism	Unclear	Molecular evidence:RNA sequencing	-0.398834	-0.98972	-0.690677	-2.78999
Traes_6DS_350AB7B02	GSMUA_Achr6T13520_001	2e-60	Musa acuminata	Hormone metabolism	Unclear	Molecular evidence:RNA sequencing	-0.429384	-0.712163	-1.54613	-4.78267
Traes_4AL_39EBA159D	GSMUA_Achr6T27150_001	E-129	Musa acuminata	Signal transduction	Unclear	Molecular evidence:RNA sequencing	0.0566991	-0.253316	-1.18865	-1.53109
Traes_4BL_1EC693E2D	GSMUA_Achr6T27150_001	E-117	Musa acuminata	Signal transduction	Unclear	Molecular evidence:RNA sequencing	0.552303	-0.860457	-1.42719	-1.40994
Traes_5DL_024D77406	GSMUA_Achr9T05970_001	0	Musa acuminata	Signal transduction	Unclear	Molecular evidence:RNA sequencing	0.30614	-0.8927	-2.01419	-3.713
Traes_1AL_B55CC2568	GSMUA_AchrUn_randomT10820_001	E-126	Musa acuminata	Hormone metabolism	Unclear	Molecular evidence:RNA sequencing	0.161769	-0.149923	-0.747864	-0.915493
Traes_1BL_714F4E4AC	GSMUA_AchrUn_randomT10820_001	E-136	Musa acuminata	Hormone metabolism	Unclear	Molecular evidence:RNA sequencing	0.169778	-0.181196	-0.881205	-1.1612
Traes_1DL_FDB539EBE	GSMUA_AchrUn_randomT10820_001	E-115	Musa acuminata	Hormone metabolism	Unclear	Molecular evidence:RNA sequencing	0.00107446	-0.34568	-0.546917	-1.07064
Traes_6AL_94CA6F0D8	GSMUA_AchrUn_randomT10820_001	0	Musa acuminata	Hormone metabolism	Unclear	Molecular evidence:RNA sequencing	0.185601	-0.421856	-0.220691	-1.41223
Traes_6AL_9F1580D39	GSMUA_AchrUn_randomT10820_001	0	Musa acuminata	Hormone metabolism	Unclear	Molecular evidence:RNA sequencing	0.262217	1.26878	2.57096	2.71756
Traes_6BL_99D26BD69	GSMUA_AchrUn_randomT10820_001	0	Musa acuminata	Hormone metabolism	Unclear	Molecular evidence:RNA sequencing	0.245121	-0.1723	0.000695219	-1.12315
Traes_6DL_84E14AD8D	GSMUA_AchrUn_randomT10820_001	0	Musa acuminata	Hormone metabolism	Unclear	Molecular evidence:RNA sequencing	0.267954	-0.252879	-0.244927	-1.622
Traes_6DL_FAD59E515	GSMUA_AchrUn_randomT10820_001	0	Musa acuminata	Hormone metabolism	Unclear	Molecular evidence:RNA sequencing	0.877491	0.725925	1.55224	1.90288
Traes_2BL_CBAE87E41	LOC_Os04g46980.1	0	Oryza sativa	Hormone response pathway	Delay	Genetic evidence:Transgene	0.352624	0.16906	1.751	1.78716
Traes_3AL_078057859	LOC_Os05g44050.1	E-116	Oryza sativa	Signal transduction	Promote	Genetic evidence:Transgene	-0.12311	0.0875542	0.497348	1.12884
Traes_2BL_432C191B71	T4G00700.1	0	Arabidopsis thaliana	Signal transduction:Calcium	Unclear	Genomic evidence:microarray data	0.354691	-0.0164593	0.603793	-2.26851
Traes_6BL_7CBA6413B	X69935.1	3e-60	Cucumis melo	Hormone response pathway:ET	Unclear	Molecular evidence:Northern and cDNA library	2.00672	3.93235	0.94742	0.901231
Traes_3AS_4D87123A6	Y12618.1	E-100	Pisum sativum	Signal transduction:Calcium signal pathway	Delay	Molecular evidence:Northern	0.0787503	0.118768	-0.383248	-0.93877
Traes_3DS_7F913AD2A	Y12618.1	E-136	Pisum sativum	Signal transduction:Calcium signal pathway	Delay	Molecular evidence:Northern	0.0382791	0.138792	-0.31354	-1.00533
Traes_4AL_0984F0669	Y12618.1	E-104	Pisum sativum	Signal transduction:Calcium signal pathway	Delay	Molecular evidence:Northern	-0.49443	-1.22838	0.209374	1.75917
Redox regulation
Traes_4DL_0A609D263	AT1G07440.1	5e-71	Arabidopsis thaliana	Redox regulation	Unclear	Genomic evidence:microarray data	-0.0654518	-0.505779	-3.20727	-6.60159
Traes_4AS_B1D4048C4	AT1G08570.1	4e-83	Arabidopsis thaliana	Redox regulation	Unclear	Genomic evidence:microarray data	-0.215017	0.126262	-2.20816	-1.53087
Traes_4DL_47DB597C2	AT1G08570.1	1e-75	Arabidopsis thaliana	Redox regulation	Unclear	Genomic evidence:microarray data	-0.47315	-0.407426	-2.41111	-2.19388
Traes_1AS_AEED1F1D7	AT1G09940.1	E-179	Arabidopsis thaliana	Redox regulation	Unclear	Genomic evidence:microarray data	-0.449599	-0.148237	-2.90042	-3.26715
Traes_1BL_EC3E899FE	AT1G09940.1	E-179	Arabidopsis thaliana	Redox regulation	Unclear	Genomic evidence:microarray data	-0.231225	-0.027447	-0.644328	-1.79656
Traes_1BS_ABD495014	AT1G09940.1	E-178	Arabidopsis thaliana	Redox regulation	Unclear	Genomic evidence:microarray data	-0.777388	0.0892952	-2.03482	-2.81701
Traes_1DL_76EEDEA29	AT1G09940.1	E-180	Arabidopsis thaliana	Redox regulation	Unclear	Genomic evidence:microarray data	-0.175713	0.0153323	-0.704495	-1.36893
Traes_1DS_B73475505	AT1G09940.1	E-179	Arabidopsis thaliana	Redox regulation	Unclear	Genomic evidence:microarray data	-0.644273	0.311477	-1.77267	-2.96903
Traes_1AL_5B26F6A14	AT1G09940.1	E-179	Arabidopsis thaliana	Redox regulation	Unclear	Genomic evidence:microarray data	-0.191027	-0.349491	-0.373621	-2.14557
Traes_1DL_AF10DFC9A	AT1G12200.1	E-107	Arabidopsis thaliana	Redox regulation	Unclear	Genomic evidence:microarray data	0.150509	0.895729	1.65431	1.84242
Traes_5AL_B976C0BF9	AT1G17020.1	9e-56	Arabidopsis thaliana	Redox regulation:Flavonoid/anthocyanin pathway	Unclear	Genomic evidence:microarray data	0.5584	0.224503	-1.29951	-1.08694
Traes_5DL_5D6AE05C1	AT1G17020.1	4e-61	Arabidopsis thaliana	Redox regulation:Flavonoid/anthocyanin pathway	Unclear	Genomic evidence:microarray data	0.999366	-0.479154	-0.0250613	0.605322
Novel07169	AT1G19250.1	E-101	Arabidopsis thaliana	Redox regulation:Monooxygenase	Unclear	Genomic evidence:microarray data	-0.288414	-0.00634096	2.19396	0.662088
Traes_5AL_C6539F937	AT1G19250.1	2e-84	Arabidopsis thaliana	Redox regulation:Monooxygenase	Unclear	Genomic evidence:microarray data	-0.328394	2.16475	4.48137	7.46312
Traes_5BL_F48317F91	AT1G19250.1	E-102	Arabidopsis thaliana	Redox regulation:Monooxygenase	Unclear	Genomic evidence:microarray data	-0.00207957	-0.0705795	2.07876	1.07845
Traes_2BL_0E87D8729	AT1G22540.1	E-110	Arabidopsis thaliana	Redox regulation	Unclear	Genomic evidence:microarray data	0.393536	0.414824	2.48322	3.79461
Traes_2DL_FF063EA72	AT1G22540.1	E-108	Arabidopsis thaliana	Redox regulation	Unclear	Genomic evidence:microarray data	0.809994	2.98067	3.85928	3.98501
Traes_3AS_9442E0834	AT1G35190.1	E-140	Arabidopsis thaliana	Redox regulation	Unclear	Genomic evidence:microarray data	-0.113508	0.272749	1.06869	2.46935
Traes_3DS_9D7D919AA	AT1G35190.1	E-132	Arabidopsis thaliana	Redox regulation	Unclear	Genomic evidence:microarray data	-0.305578	0.0518569	0.563565	2.31951
Traes_2AL_25944DD47	AT1G60730.1	E-150	Arabidopsis thaliana	Redox regulation	Unclear	Genomic evidence:microarray data	1.50294	1.08378	2.83424	4.52525
Traes_2AL_5C6928F55	AT1G60730.1	E-106	Arabidopsis thaliana	Redox regulation	Unclear	Genomic evidence:microarray data	-0.285893	0.184145	1.01215	2.23998
Traes_2AL_81C13DF27	AT1G60730.1	E-140	Arabidopsis thaliana	Redox regulation	Unclear	Genomic evidence:microarray data	2.43356	2.81847	3.8185	3.2137
Traes_2DL_452B7BC44	AT1G60730.1	E-131	Arabidopsis thaliana	Redox regulation	Unclear	Genomic evidence:microarray data	1.07944	-0.476579	1.65919	2.78922
Traes_1AL_3A1D8DC66	AT1G64950.1	E-105	Arabidopsis thaliana	Redox regulation	Unclear	Genomic evidence:microarray data	0.13416	0.827622	1.95634	1.56674
Novel08617	AT1G66540.1	3e-81	Arabidopsis thaliana	Redox regulation:Monooxygenase	Unclear	Genomic evidence:microarray data	1.42847	2.66061	4.96147	6.69259
Traes_5BL_BAB8C9E62	AT1G76150.1	E-107	Arabidopsis thaliana	Redox regulation	Unclear	Genomic evidence:microarray data	0.4532	0.128343	2.01218	2.94741
Traes_6AL_80FD46553	AT1G77490.1	E-158	Arabidopsis thaliana	Redox regulation:ROS	Unclear	Molecular evidence:Real-Time PCR	-0.263033	-0.992308	-0.637727	-2.72823
Traes_6BL_83DE6DC09	AT1G77490.1	E-146	Arabidopsis thaliana	Redox regulation:ROS	Unclear	Molecular evidence:Real-Time PCR	-0.214898	-1.03611	-1.66856	-3.53908
Traes_6DL_2A99B8CDC	AT1G77490.1	E-157	Arabidopsis thaliana	Redox regulation:ROS	Unclear	Molecular evidence:Real-Time PCR	-0.267668	-0.97266	-1.78802	-3.53945
Traes_2AS_9F72E517F	AT2G17420.1	7e-86	Arabidopsis thaliana	Redox regulation	Unclear	Genomic evidence:microarray data	0.0880492	-0.155719	-0.525799	-1.1397
Traes_7DL_8B9E4EDE0	AT2G18950.1	E-131	Arabidopsis thaliana	Redox regulation:Antioxidants	Unclear	Genomic evidence:microarray data	0.306849	0.444291	3.39952	3.54137
Traes_5BL_881FB6FDE	AT2G22420.1	E-115	Arabidopsis thaliana	Redox regulation	Unclear	Genomic evidence:microarray data	0.485969	-1.27917	-0.544221	-1.42279
Traes_7DL_CE37E2AF1	AT2G22420.1	2e-64	Arabidopsis thaliana	Redox regulation	Unclear	Genomic evidence:microarray data	-0.103861	1.11623	3.30492	5.77554
Traes_7AS_634102ABF	AT2G25080.1	9e-76	Arabidopsis thaliana	Redox regulation	Unclear	Genomic evidence:microarray data	-0.101652	0.27904	0.0754187	-1.21908
Traes_7DS_546D3927E	AT2G25080.1	7e-74	Arabidopsis thaliana	Redox regulation	Unclear	Genomic evidence:microarray data	-0.118693	0.138493	-0.383445	-1.36202
Traes_5AL_78A6081BC	AT2G38240.1	3e-87	Arabidopsis thaliana	Redox regulation:Flavonoid biosynthesis	Unclear	Genomic evidence:microarray data	-0.689325	2.20223	3.28431	7.00418
Traes_2BL_71510E525	AT2G45570.1	E-121	Arabidopsis thaliana	Redox regulation:Monooxygenase	Unclear	Genomic evidence:microarray data	-0.224795	1.87028	3.82329	5.54157
Traes_4AL_54FF16737	AT2G45570.1	E-123	Arabidopsis thaliana	Redox regulation:Monooxygenase	Unclear	Genomic evidence:microarray data	-0.0569278	1.79577	0.381953	0.474277
Traes_5BL_175E0D966	AT2G45570.1	1e-42	Arabidopsis thaliana	Redox regulation:Monooxygenase	Unclear	Genomic evidence:microarray data	0.0904844	0.0151132	0.756875	2.59925
Traes_5BS_99839CDF9	AT2G45570.1	2e-73	Arabidopsis thaliana	Redox regulation:Monooxygenase	Unclear	Genomic evidence:microarray data	0.026057	-0.174611	0.452993	2.31701
Traes_6AS_DE31C9DA8	AT2G45570.1	E-112	Arabidopsis thaliana	Redox regulation:Monooxygenase	Unclear	Genomic evidence:microarray data	-0.234268	0.183189	-1.63659	-2.2544
Novel00489	AT2G45580.1	3e-93	Arabidopsis thaliana	Redox regulation:Monooxygenase	Unclear	Genomic evidence:microarray data	0.872973	1.68302	7.95216	9.34071
Novel01583	AT2G45580.1	1e-92	Arabidopsis thaliana	Redox regulation:Monooxygenase	Unclear	Genomic evidence:microarray data	0.601342	5.69257	9.51216	9.57425
Traes_2AS_4195EE5F5	AT2G46950.1	E-105	Arabidopsis thaliana	Redox regulation:Monooxygenase	Unclear	Genomic evidence:microarray data	-1.21391	-1.8045	-0.705458	0.536987
Traes_2AS_D06B6414D	AT2G46950.1	E-146	Arabidopsis thaliana	Redox regulation:Monooxygenase	Unclear	Genomic evidence:microarray data	-0.171922	1.01268	1.07279	1.47927
Traes_2DS_1125D8A30	AT2G46950.1	E-138	Arabidopsis thaliana	Redox regulation:Monooxygenase	Unclear	Genomic evidence:microarray data	-0.75889	-1.07481	2.04599	4.86751
Traes_3AL_426C7668F	AT3G14680.1	E-140	Arabidopsis thaliana	Redox regulation	Unclear	Genomic evidence:microarray data	0.258008	1.62474	0.949314	1.12525
Traes_3B_F20BD0FCA	AT3G14680.1	E-160	Arabidopsis thaliana	Redox regulation	Unclear	Genomic evidence:microarray data	0.107978	1.08536	1.26069	1.47306
Traes_7BL_1D7C441C5	AT3G14680.1	E-149	Arabidopsis thaliana	Redox regulation	Unclear	Genomic evidence:microarray data	0.407718	1.36611	1.43493	0.907129
Traes_7BL_A84D60579	AT3G14680.1	9e-61	Arabidopsis thaliana	Redox regulation	Unclear	Genomic evidence:microarray data	0.201328	-1.82468	-0.661695	-0.157328
Traes_7DL_8EC221DDF	AT3G14680.1	E-157	Arabidopsis thaliana	Redox regulation	Unclear	Genomic evidence:microarray data	1.18308	2.87434	3.34848	3.8282
Traes_3B_C7A224494	AT3G21360.1	E-116	Arabidopsis thaliana	Redox regulation	Unclear	Genomic evidence:microarray data	0.512114	0.761823	0.7892	1.87875
Traes_5DL_DE930D8C9	AT3G26220.1	2e-71	Arabidopsis thaliana	Redox regulation	Unclear	Genomic evidence:microarray data	1.74955	1.65661	3.07155	5.27916
Traes_2BS_011B0377F	AT3G26280.1	5e-94	Arabidopsis thaliana	Redox regulation	Unclear	Genomic evidence:microarray data	2.11619	0.801952	1.5342	3.69813
Traes_3DS_315D8598E	AT3G26280.1	3e-20	Arabidopsis thaliana	Redox regulation	Unclear	Genomic evidence:microarray data	2.56657	-0.394718	3.06263	5.93552
Traes_3AS_924A341AA	AT3G26300.1	6e-66	Arabidopsis thaliana	Redox regulation	Unclear	Genomic evidence:microarray data	1.99068	-0.890611	1.58213	4.86593
Traes_3B_B06E22C7B	AT3G26300.1	1e-52	Arabidopsis thaliana	Redox regulation	Unclear	Genomic evidence:microarray data	0.780944	1.69299	3.15982	8.43959
Traes_3B_E05F9493F	AT3G26300.1	2e-99	Arabidopsis thaliana	Redox regulation	Unclear	Genomic evidence:microarray data	1.22314	0.0904025	1.61452	3.59989
Traes_4AL_31E568671	AT3G26300.1	E-120	Arabidopsis thaliana	Redox regulation	Unclear	Genomic evidence:microarray data	1.3766	-1.36591	-3.17688	-3.3328
Traes_4AL_516694F65	AT3G26300.1	E-123	Arabidopsis thaliana	Redox regulation	Unclear	Genomic evidence:microarray data	-0.368285	-0.308638	-2.28575	-2.79241
Traes_6DS_D83B2D84C	AT3G26300.1	5e-68	Arabidopsis thaliana	Redox regulation	Unclear	Genomic evidence:microarray data	-0.360826	-0.154438	-1.52251	-1.09453
Traes_1AL_0121566F8	AT3G28510.1	4e-76	Arabidopsis thaliana	Redox regulation:ATPase	Unclear	Genomic evidence:microarray data	0.758658	0.291871	-0.640709	-2.43647
Traes_1DL_DC879CDBC	AT3G28510.1	1e-91	Arabidopsis thaliana	Redox regulation:ATPase	Unclear	Genomic evidence:microarray data	0.878439	0.814783	0.0625128	-2.00084
Traes_1BL_D3E2887F4	AT3G28580.1	5e-84	Arabidopsis thaliana	Redox regulation:ATPase	Unclear	Genomic evidence:microarray data	0.857912	0.322065	-0.0865124	-1.55144
Traes_2AS_8DE0CE26E	AT3G28580.1	3e-74	Arabidopsis thaliana	Redox regulation:ATPase	Unclear	Genomic evidence:microarray data	1.14846	0.418466	-1.72825	-4.21593
Traes_5DS_6B0914F18	AT3G28580.1	E-144	Arabidopsis thaliana	Redox regulation:ATPase	Unclear	Genomic evidence:microarray data	0.634632	1.04227	1.79386	1.81361
Traes_1DL_2CB152B68	AT3G48280.1	7e-75	Arabidopsis thaliana	Redox regulation	Unclear	Genomic evidence:microarray data	0.885249	5.97417	4.99348	5.64752
Traes_5BL_3F9D3DFE8	AT3G48280.1	E-100	Arabidopsis thaliana	Redox regulation	Unclear	Genomic evidence:microarray data	1.0346	1.65683	4.04099	4.07533
Traes_5DL_C65153D64	AT3G48280.1	1e-97	Arabidopsis thaliana	Redox regulation	Unclear	Genomic evidence:microarray data	1.49206	1.03698	2.34292	4.47728
Traes_1AL_2A7AD5CEC	AT3G48280.1	1e-77	Arabidopsis thaliana	Redox regulation	Unclear	Genomic evidence:microarray data	1.90764	5.74782	4.18799	3.4868
Traes_7DL_8C1C72C7E	AT3G50210.3	E-126	Arabidopsis thaliana	Redox regulation:Flavonoid biosynthesis	Unclear	Genomic evidence:microarray data	-0.383516	0.187436	0.279741	1.31525
Traes_1AS_787535721	AT3G51840.1	0	Arabidopsis thaliana	Redox regulation	Unclear	Genomic evidence:microarray data	0.140987	0.331799	1.58776	2.47372
Traes_1BS_716EA1208	AT3G51840.1	0	Arabidopsis thaliana	Redox regulation	Unclear	Genomic evidence:microarray data	-0.04402	0.390949	1.3286	2.32282
Traes_1DS_5C7C282F6	AT3G51840.1	0	Arabidopsis thaliana	Redox regulation	Unclear	Genomic evidence:microarray data	0.151002	0.404984	1.88896	2.77791
Traes_1AL_0913A6035	AT4G02940.1	E-101	Arabidopsis thaliana	Redox regulation	Unclear	Genomic evidence:microarray data	-0.462311	0.661138	1.42506	1.7158
Traes_1BL_4EB6DE337	AT4G02940.1	E-101	Arabidopsis thaliana	Redox regulation	Unclear	Genomic evidence:microarray data	-0.445573	0.651946	2.95328	2.4964
Traes_1DL_CAA9298F0	AT4G02940.1	5e-90	Arabidopsis thaliana	Redox regulation	Unclear	Genomic evidence:microarray data	-0.811637	0.304601	2.71343	2.75282
Traes_2AL_7EABAC855	AT4G09010.1	E-116	Arabidopsis thaliana	Redox regulation:ROS	Delay	Molecular evidence:Real-Time PCR	-0.720063	-0.764995	-2.6129	-4.84967
Traes_2BL_E3222439E	AT4G09010.1	E-115	Arabidopsis thaliana	Redox regulation:ROS	Delay	Molecular evidence:Real-Time PCR	-0.515514	-1.42504	-3.79904	-6.57563
Traes_2DL_AFBB29E25	AT4G09010.1	7e-67	Arabidopsis thaliana	Redox regulation:ROS	Delay	Molecular evidence:Real-Time PCR	-0.391662	-0.732718	-2.29479	-4.42459
Traes_7AL_34D6E5034	AT4G09750.1	2e-81	Arabidopsis thaliana	Redox regulation	Unclear	Genomic evidence:microarray data	0.564959	0.442553	1.76647	2.88737
Traes_7BL_C42723CB2	AT4G09750.1	E-138	Arabidopsis thaliana	Redox regulation	Unclear	Genomic evidence:microarray data	0.31437	0.690196	1.48933	2.2548
Traes_3B_D6FB23C95	AT4G13310.1	1e-95	Arabidopsis thaliana	Redox regulation	Unclear	Genomic evidence:microarray data	1.74678	-1.30152	1.58315	4.11557
Novel10027	AT4G21580.1	E-105	Arabidopsis thaliana	Redox regulation	Unclear	Genomic evidence:microarray data	0.191977	0.464818	1.15645	1.62865
Traes_2AL_FD91EC97F	AT4G22260.1	E-101	Arabidopsis thaliana	Redox regulation	Unclear	Genomic evidence:microarray data	-0.00919954	0.645805	1.06981	-1.98192
Traes_2BL_11A295DD8	AT4G22260.1	1e-99	Arabidopsis thaliana	Redox regulation	Unclear	Genomic evidence:microarray data	-0.055508	0.801377	1.1491	-0.616322
Traes_2DL_DA735033B	AT4G22260.1	3e-59	Arabidopsis thaliana	Redox regulation	Unclear	Genomic evidence:microarray data	0.0142921	0.845164	0.512953	-2.17328
Traes_2DL_F42271633	AT4G22260.1	2e-37	Arabidopsis thaliana	Redox regulation	Unclear	Genomic evidence:microarray data	0.0568416	0.832771	0.646779	-2.26065
Traes_3AS_7D4A02371	AT4G23430.2	4e-72	Arabidopsis thaliana	Redox regulation	Unclear	Genomic evidence:microarray data	-0.312879	-1.66823	1.55391	3.63835
Traes_4AL_53D184BC0	AT4G23430.2	E-100	Arabidopsis thaliana	Redox regulation	Unclear	Genomic evidence:microarray data	-0.0703814	-0.378365	-0.747781	-2.09881
Traes_4BS_9D357D2E0	AT4G23430.2	1e-99	Arabidopsis thaliana	Redox regulation	Unclear	Genomic evidence:microarray data	-0.107305	-0.885833	-1.21958	-2.7643
Traes_4DS_8E712C446	AT4G23430.2	3e-99	Arabidopsis thaliana	Redox regulation	Unclear	Genomic evidence:microarray data	-0.0331499	-0.582103	-1.06519	-2.05648
Traes_2BL_34819D129	AT4G31240.1	3e-69	Arabidopsis thaliana	Redox regulation	Unclear	Genomic evidence:microarray data	0.40442	0.318548	-0.34477	-1.65667
Traes_2DL_28DFAC79D	AT4G31240.1	2e-70	Arabidopsis thaliana	Redox regulation	Unclear	Genomic evidence:microarray data	0.225923	0.289899	-0.249701	-1.63371
Traes_2BL_0783B8D8C	AT4G37370.1	5e-94	Arabidopsis thaliana	Redox regulation	Unclear	Genomic evidence:microarray data	0.430896	0.660417	2.11594	4.2829
Traes_1BL_164A89B5B	AT5G06060.1	2e-74	Arabidopsis thaliana	Redox regulation	Unclear	Genomic evidence:microarray data	0.550929	-0.913522	-1.44866	-1.68479
Traes_5AS_F0A90707C	AT5G06060.1	8e-54	Arabidopsis thaliana	Redox regulation	Unclear	Genomic evidence:microarray data	0.0409528	2.08849	5.29753	6.20006
Traes_5DL_F7C61A149	AT5G07990.1	E-112	Arabidopsis thaliana	Redox regulation:Flavonoid biosynthesis	Unclear	Genomic evidence:microarray data	1.41785	1.34017	-0.526219	-1.62904
Traes_4AS_B67F89B5A	AT5G24150.1	E-129	Arabidopsis thaliana	Redox regulation	Unclear	Genomic evidence:microarray data	0.775288	0.482734	1.07965	2.58976
Traes_4AL_92A7B1118	AT5G39090.1	6e-53	Arabidopsis thaliana	Redox regulation:Flavonoid biosynthesis	Unclear	Genomic evidence:microarray data	0.271516	-0.320293	2.4582	2.94259
Traes_7DS_95B66A10F	AT5G51970.2	7e-61	Arabidopsis thaliana	Redox regulation	Unclear	Genomic evidence:microarray data	-0.011442	0.336632	-0.922139	-1.63449
Traes_2AL_43F271120	AT5G61640.1	8e-61	Arabidopsis thaliana	Redox regulation:Antioxidants	Unclear	Genomic evidence:microarray data	0.0618872	0.566285	1.14489	0.354692
Traes_7DL_BF0FB78FF	AT5G65760.1	E-158	Arabidopsis thaliana	Redox regulation	Unclear	Genomic evidence:microarray data	0.17924	0.167147	-0.887218	-0.744286
Traes_5AL_104BAD095	AT5G66760.1	0	Arabidopsis thaliana	Redox regulation	Unclear	Genomic evidence:microarray data	0.187369	0.46232	1.21456	1.78889
Traes_5BL_25853B117	AT5G66760.1	0	Arabidopsis thaliana	Redox regulation	Unclear	Genomic evidence:microarray data	0.224371	0.911571	1.01756	2.21617
Traes_5DL_FB06824E1	AT5G66760.1	0	Arabidopsis thaliana	Redox regulation	Unclear	Genomic evidence:microarray data	0.17341	0.907616	1.2804	2.09548
Traes_6AS_7FB8F9A66	LOC_Os03g03910.1	0	Oryza sativa	Redox regulation	Promote	Genetic evidence:Mutant	0.113016	0.635277	1.65956	-0.308969
Traes_4BS_DEACD7F0B	LOC_Os03g24380.1	3e-86	Oryza sativa	Redox regulation:Peroxidase	Unclear	Molecular evidence: SSH/Northern blot/RT-PCR	-0.040793	0.0432189	0.662076	1.29504
Traes_7BL_7A3B8A199	LOC_Os06g51150.1	0	Oryza sativa	Redox regulation:Catalase	Unclear	Molecular evidence: SSH/Northern blot/RT-PCR	-0.0765254	0.353402	1.24471	2.35868
Traes_7DL_44F6042FE	LOC_Os06g51150.1	0	Oryza sativa	Redox regulation:Catalase	Unclear	Molecular evidence: SSH/Northern blot/RT-PCR	-0.123869	0.0105996	1.55398	2.59826
Traes_4AL_D0DECE300	LOC_Os08g15149.1	E-121	Oryza sativa	Redox regulation:Oxidoreductase	Unclear	Molecular evidence: SSH, Northern blot and RT-PCR	0.533747	0.159799	0.271499	1.93837
Traes_4DS_A89A8FAD91	LOC_Os08g15149.1	E-124	Oryza sativa	Redox regulation:Oxidoreductase	Unclear	Molecular evidence: SSH, Northern blot and RT-PCR	1.6418	-0.683499	1.38731	5.84702
Traes_1DL_93E80C14A	LOC_Os10g36848.1	E-107	Oryza sativa	Redox regulation:P450	Unclear	Molecular evidence: SSH, Northern blot and RT-PCR	0.794641	1.32816	2.30228	3.83237
Cell development
Traes_1AL_8469289D7	AT1G32080.1	5e-66	Arabidopsis thaliana	Cell death	Promote	Genetic evidence:Transgene	-0.101126	-0.322032	-1.87925	-1.82037
Traes_1AL_C544E6828	AT1G32080.1	E-115	Arabidopsis thaliana	Cell death	Promote	Genetic evidence:Transgene	-0.176594	-0.614355	-1.95026	-2.19963
Traes_1BL_DDF7D3F25	AT1G32080.1	0	Arabidopsis thaliana	Cell death	Promote	Genetic evidence:Transgene	-0.0922111	-0.636584	-1.56485	-2.0708
Traes_1DL_A2274582B	AT1G32080.1	E-103	Arabidopsis thaliana	Cell death	Promote	Genetic evidence:Transgene	-0.133081	-0.481463	-1.26816	-1.95588
Traes_2AL_1CC09E982	AT1G62040.1	4e-57	Arabidopsis thaliana	Autophagy	Delay	Molecular and physiologic evidence :GUS staining	-0.160577	0.142488	1.06728	2.03933
Traes_2BL_89749BD6C	AT1G62040.1	3e-57	Arabidopsis thaliana	Autophagy	Delay	Molecular and physiologic evidence :GUS staining	-0.21621	0.0568393	0.799706	1.69523
Traes_2BS_66D0C26F4	AT1G62040.1	8e-54	Arabidopsis thaliana	Autophagy	Delay	Molecular and physiologic evidence :GUS staining	-0.0220184	0.492647	0.861359	1.51311
Traes_2DS_C53EC62E8	AT1G62040.1	8e-54	Arabidopsis thaliana	Autophagy	Delay	Molecular and physiologic evidence :GUS staining	0.090519	0.401664	0.841686	1.61975
Traes_6AS_3753A6F2C	AT4G34230.1	E-159	Arabidopsis thaliana	Lignin synthesis	Unclear	Genomic evidence:microarray data	0.422098	-0.0371655	1.37462	1.61608
Traes_6DS_211935E65	AT4G34230.1	E-158	Arabidopsis thaliana	Lignin synthesis	Unclear	Genomic evidence:microarray data	0.597936	-0.111409	0.990248	1.77496
Traes_3AL_27DCCC109	AT5G45900.1	8e-97	Arabidopsis thaliana	Autophagy	Delay	Genetic evidence:Mutant; Genomic evidence:microarray data	-0.117721	-0.0434335	1.57559	3.00903
Traes_3AL_81D411955	AT5G45900.1	6e-56	Arabidopsis thaliana	Autophagy	Delay	Genetic evidence:Mutant; Genomic evidence:microarray data	0.40256	0.591524	2.23826	3.55991
Traes_3B_59346D50C	AT5G45900.1	E-163	Arabidopsis thaliana	Autophagy	Delay	Genetic evidence:Mutant; Genomic evidence:microarray data	-0.118464	-0.0225883	1.37215	2.91017
Traes_3DL_97C8641C3	AT5G45900.1	E-148	Arabidopsis thaliana	Autophagy	Delay	Genetic evidence:Mutant; Genomic evidence:microarray data	0.0405394	0.0631944	1.17023	2.71543
Novel03740	GRMZM2G054715_T02	3e-68	Zea mays	Cell.organisation	Unclear	Genomic evidence:microarray data	1.08811	-0.809719	-0.313926	-1.37412
Traes_3B_8A7D9FE60	GRMZM2G054715_T02	E-109	Zea mays	Cell.organisation	Unclear	Genomic evidence:microarray data	-0.129053	-3.94769	-3.94824	-6.40072
Traes_3DL_F5930F58D	GRMZM2G054715_T02	5e-28	Zea mays	Cell.organisation	Unclear	Genomic evidence:microarray data	1.03849	-1.01987	0.40765	-0.0195732
Novel02724	GRMZM2G054715_T06	E-122	Zea mays	Cell.organisation	Unclear	Genomic evidence:microarray data	-0.242712	-3.4413	-1.65209	0.328962
Traes_2AL_8394449B2	GRMZM2G054715_T06	1e-53	Zea mays	Cell.organisation	Unclear	Genomic evidence:microarray data	0.227627	-2.13011	0.256153	2.16633
Traes_3AS_44927A043	GSMUA_Achr10T12920_001	E-114	Musa acuminata	Cell wall metabolism	Unclear	Molecular evidence:RNA sequencing	-0.178194	1.87547	2.2187	3.97039
Traes_4AL_F96A1673B	GSMUA_Achr11T10400_001	1e-47	Musa acuminata	Cell and development	Unclear	Molecular evidence:RNA sequencing	-0.566399	-2.8608	-3.76501	-3.24265
Traes_2AL_97C8E5772	GSMUA_Achr3T26220_001	3e-60	Musa acuminata	Cell wall metabolism	Unclear	Molecular evidence:RNA sequencing	1.92614	5.54631	7.45949	7.49423
Traes_2BL_5A50FDA1A	GSMUA_Achr5T18560_001	0	Musa acuminata	Cell wall metabolism	Unclear	Molecular evidence:RNA sequencing	1.28796	-0.185445	-0.518344	-0.528782
Traes_2DL_83168C1E0	GSMUA_Achr5T18560_001	1e-59	Musa acuminata	Cell wall metabolism	Unclear	Molecular evidence:RNA sequencing	1.05717	-0.0957557	-1.35667	-1.0519
Traes_2BL_51925417E	GSMUA_Achr6T08120_001	9e-75	Musa acuminata	Cell wall metabolism	Unclear	Molecular evidence:RNA sequencing	0.471525	0.280542	1.0526	1.34846
Traes_5DL_7B261BB16	GSMUA_Achr6T36390_001	E-131	Musa acuminata	Cell wall metabolism	Unclear	Molecular evidence:RNA sequencing	0.0193694	0.202825	1.08409	1.21072
Traes_7BS_984D5C4A3	GSMUA_Achr6T36390_001	7e-97	Musa acuminata	Cell wall metabolism	Unclear	Molecular evidence:RNA sequencing	-0.0809945	-0.00958996	1.12777	-0.640011
Traes_6DL_BC96FBEE2	GSMUA_Achr7T16910_001	0	Musa acuminata	Cell and development	Unclear	Molecular evidence:RNA sequencing	0.299315	1.50485	1.80746	2.07298
Traes_3B_620A2C0FC	GSMUA_Achr7T18320_001	0	Musa acuminata	Cell wall metabolism	Unclear	Molecular evidence:RNA sequencing	0.486303	0.317407	0.929056	2.55959
Traes_3B_D4262248A	GSMUA_Achr7T18320_001	0	Musa acuminata	Cell wall metabolism	Unclear	Molecular evidence:RNA sequencing	0.486511	2.31027	2.10046	3.91301
Traes_2BL_6224F0936	GSMUA_Achr8T11090_001	0	Musa acuminata	Cell wall metabolism	Unclear	Molecular evidence:RNA sequencing	0.777893	0.166287	2.06016	3.90995
Traes_1AL_5D3EECC71	GSMUA_Achr8T16150_001	0	Musa acuminata	Cell and development	Unclear	Molecular evidence:RNA sequencing	0.163872	1.02317	1.75614	1.39135
Traes_1AL_E195290EF	GSMUA_Achr8T16150_001	0	Musa acuminata	Cell and development	Unclear	Molecular evidence:RNA sequencing	0.180333	1.03041	1.42126	2.01786
Traes_3AL_0D64FFEF1	GSMUA_Achr8T16150_001	5e-97	Musa acuminata	Cell and development	Unclear	Molecular evidence:RNA sequencing	0.280185	0.371147	1.30011	1.64673
Traes_5BL_4BD0ED173	GSMUA_Achr8T16150_001	0	Musa acuminata	Cell and development	Unclear	Molecular evidence:RNA sequencing	-0.188741	0.139656	-0.606609	-1.50174
Traes_3DL_FB0A5E02C	GSMUA_Achr8T22170_001	0	Musa acuminata	Cell and development	Unclear	Molecular evidence:RNA sequencing	0.281485	0.340852	2.3429	1.30079
Traes_2DL_5B2C0DF1C	GSMUA_AchrUn_randomT04290_001	E-175	Musa acuminata	Cell wall metabolism	Unclear	Molecular evidence:RNA sequencing	0.154194	-0.267162	-0.612019	-0.879557
Traes_3AS_76A815719	LOC_Os01g15020.1	0	Oryza sativa	Flower development	Unclear	Molecular evidence: SSH/Northern blot/RT-PCR	0.0598177	1.01183	1.25904	1.93497
Traes_3B_5AAD28F95	LOC_Os01g15020.1	0	Oryza sativa	Flower development	Unclear	Molecular evidence: SSH/Northern blot/RT-PCR	-0.00733647	0.786716	0.964629	1.46458
Traes_3DS_DEE36BCD2	LOC_Os01g15020.1	0	Oryza sativa	Flower development	Unclear	Molecular evidence: SSH/Northern blot/RT-PCR	0.165289	0.983776	1.29842	2.041
Energy metabolism
Traes_4DL_6E268074D	AT1G02890.1	0	Arabidopsis thaliana	ATPases	Unclear	Genomic evidence:microarray data	0.0899033	-0.138932	0.512464	1.24334
Traes_1AL_75166A6E7	AT4G30490.1	E-175	Arabidopsis thaliana	ATPases	Unclear	Genomic evidence:microarray data	0.555706	0.188333	0.727231	1.48418
Traes_1BL_65CB8FB81	AT4G30490.1	9e-80	Arabidopsis thaliana	ATPases	Unclear	Genomic evidence:microarray data	0.240035	-0.286523	0.664032	1.80615
Traes_1DL_36028FD0A	AT4G30490.1	E-173	Arabidopsis thaliana	ATPases	Unclear	Genomic evidence:microarray data	0.256602	-0.276167	0.272221	1.59762
Traes_2BL_B2B719C14	GSMUA_Achr11T19550_001	E-129	Musa acuminata	Energy metabolism	Unclear	Molecular evidence:RNA sequencing	-0.0973589	-0.120185	0.103901	0.9574
Traes_4AS_D4EDEAF05	GSMUA_Achr3T30070_001	0	Musa acuminata	Energy metabolism	Unclear	Molecular evidence:RNA sequencing	0.664336	-1.07867	-1.63628	-1.19629
Traes_4BL_B4F048033	GSMUA_Achr3T30070_001	0	Musa acuminata	Energy metabolism	Unclear	Molecular evidence:RNA sequencing	0.65795	-0.578327	-1.87263	-2.1045
Traes_4DL_CA9D24688	GSMUA_Achr3T30070_001	0	Musa acuminata	Energy metabolism	Unclear	Molecular evidence:RNA sequencing	0.623321	-0.376895	-1.30541	-1.49133
Traes_5AL_74532EE6C	GSMUA_Achr3T30070_001	0	Musa acuminata	Energy metabolism	Unclear	Molecular evidence:RNA sequencing	0.0563846	-0.030134	-0.375618	-0.820116
Traes_3DL_1C32EC971	GSMUA_Achr4T10320_001	0	Musa acuminata	Energy metabolism	Unclear	Molecular evidence:RNA sequencing	0.012382	0.499453	1.25638	0.845584
Traes_1AL_0815BD32E	GSMUA_Achr4T28890_001	0	Musa acuminata	Energy metabolism	Unclear	Molecular evidence:RNA sequencing	0.216639	0.14627	0.680139	-0.5288
Traes_7AL_4EFFD9BDF	GSMUA_Achr4T33660_001	0	Musa acuminata	Energy metabolism	Unclear	Molecular evidence:RNA sequencing	0.144693	-1.52711	1.03003	1.87579
Traes_1AS_80446C38C	GSMUA_Achr5T28130_001	2e-50	Musa acuminata	Energy metabolism	Unclear	Molecular evidence:RNA sequencing	-0.290841	0.350375	-1.05582	-2.12598
Traes_5AL_31CDB68F2	GSMUA_Achr6T02650_001	7e-87	Musa acuminata	Energy metabolism	Unclear	Molecular evidence:RNA sequencing	-0.19287	-0.167216	-0.872914	-2.29618
Traes_5BL_8A99D83A5	GSMUA_Achr6T02650_001	E-108	Musa acuminata	Energy metabolism	Unclear	Molecular evidence:RNA sequencing	-0.258394	-0.18578	-0.768416	-1.9035
Traes_5DL_0927957E4	GSMUA_Achr6T02650_001	E-108	Musa acuminata	Energy metabolism	Unclear	Molecular evidence:RNA sequencing	-0.254206	-0.108481	-0.853332	-2.27572
Traes_5DS_3C0D10B64	GSMUA_Achr6T02650_001	E-112	Musa acuminata	Energy metabolism	Unclear	Molecular evidence:RNA sequencing	-0.0193013	0.314812	0.683027	1.66612
Traes_7DL_FE457F7CD	GSMUA_Achr6T14490_001	0	Musa acuminata	Energy metabolism	Unclear	Molecular evidence:RNA sequencing	0.0820778	0.869929	-0.0352061	-0.541122
Traes_3B_462F915B7	GSMUA_Achr6T26850_001	0	Musa acuminata	Energy metabolism	Unclear	Molecular evidence:RNA sequencing	0.126971	0.059869	2.17877	-0.375976
Traes_7DL_1211AEDF2	GSMUA_Achr6T26850_001	8e-59	Musa acuminata	Energy metabolism	Unclear	Molecular evidence:RNA sequencing	0.218431	0.938611	0.127033	-0.752328
Traes_7DL_7213DE8AF	GSMUA_Achr8T14260_001	7e-54	Musa acuminata	Energy metabolism	Unclear	Molecular evidence:RNA sequencing	0.106372	0.301541	-1.79403	0.222257
Traes_2AL_BE5540B1E	GSMUA_Achr8T28810_001	0	Musa acuminata	Energy metabolism	Unclear	Molecular evidence:RNA sequencing	0.0721434	0.807416	5.48857	6.7604
Traes_2BL_4AA60700A	GSMUA_Achr8T28810_001	0	Musa acuminata	Energy metabolism	Unclear	Molecular evidence:RNA sequencing	0.242327	-0.354805	7.34425	9.71491
Traes_2DL_0AB0ABFD5	GSMUA_Achr8T28810_001	0	Musa acuminata	Energy metabolism	Unclear	Molecular evidence:RNA sequencing	-0.0863354	0.334068	5.62578	7.83744
Traes_5AL_802C1113C	GSMUA_Achr8T29470_001	0	Musa acuminata	Energy metabolism	Unclear	Molecular evidence:RNA sequencing	0.737801	2.89287	1.91106	1.26803
Traes_5DL_F30005957	GSMUA_Achr8T29470_001	0	Musa acuminata	Energy metabolism	Unclear	Molecular evidence:RNA sequencing	-0.0237686	1.34698	0.253365	0.400489
Traes_4AL_4C3BBE546	GSMUA_Achr9T20740_001	0	Musa acuminata	Energy metabolism	Unclear	Molecular evidence:RNA sequencing	-0.0452326	-0.26816	0.827693	-1.67312
Traes_7AS_CB60FA3AE	GSMUA_Achr9T20740_001	E-141	Musa acuminata	Energy metabolism	Unclear	Molecular evidence:RNA sequencing	-0.0883844	-0.371888	-0.0336886	-1.98611
Traes_7DS_42F8FD2BD	GSMUA_Achr9T20740_001	0	Musa acuminata	Energy metabolism	Unclear	Molecular evidence:RNA sequencing	-0.0901756	-0.361215	0.107121	-1.3156
Traes_5AL_66D8F6463	LOC_Os03g53230.1	E-165	Oryza sativa	Energy metabolism	Unclear	Molecular evidence: SSH, Northern blot and RT-PCR	0.355686	-0.767983	-0.169733	1.37685
Traes_5BL_5CED2C911	LOC_Os03g53230.1	0	Oryza sativa	Energy metabolism	Unclear	Molecular evidence: SSH, Northern blot and RT-PCR	0.287562	-0.760481	0.145609	1.88016
Traes_5DL_BCEFD69DA	LOC_Os03g53230.1	E-176	Oryza sativa	Energy metabolism	Unclear	Molecular evidence: SSH, Northern blot and RT-PCR	-0.0350906	-0.203056	0.391877	2.01003
Transcription regulation
Novel02829	AC205250.3_FGT004	0	Zea mays	RNA.regulation of transcription.C2H2 zinc finger family	Unclear	Genomic evidence:microarray data	0.652715	-0.604131	-2.82814	-4.23664
Novel09393	AC205250.3_FGT004	E-170	Zea mays	RNA.regulation of transcription.C2H2 zinc finger family	Unclear	Genomic evidence:microarray data	0.408917	-1.09493	-1.50667	-2.41586
Novel10015	AC205250.3_FGT004	E-157	Zea mays	RNA.regulation of transcription.C2H2 zinc finger family	Unclear	Genomic evidence:microarray data	0.296287	-1.28441	-2.41034	-3.6105
Traes_1AL_88C4E33E6	AC205250.3_FGT004	0	Zea mays	RNA.regulation of transcription.C2H2 zinc finger family	Unclear	Genomic evidence:microarray data	-0.00920249	0.240589	-1.49633	-2.68739
Traes_2BL_FE3AD6919	AC205250.3_FGT004	0	Zea mays	RNA.regulation of transcription.C2H2 zinc finger family	Unclear	Genomic evidence:microarray data	0.169754	0.598535	-0.625602	-1.51726
Traes_2DL_E2DA84D05	AC205250.3_FGT004	0	Zea mays	RNA.regulation of transcription.C2H2 zinc finger family	Unclear	Genomic evidence:microarray data	0.408706	-1.29431	-4.13246	-4.54324
Traes_2DS_032B64A46	AC205250.3_FGT004	0	Zea mays	RNA.regulation of transcription.C2H2 zinc finger family	Unclear	Genomic evidence:microarray data	0.237978	-0.597556	-1.57081	-2.97369
Traes_3B_0A6ED48BE	AC205250.3_FGT004	0	Zea mays	RNA.regulation of transcription.C2H2 zinc finger family	Unclear	Genomic evidence:microarray data	0.529812	-0.608819	-2.23091	-2.72426
Traes_6AL_C22A20588	AC205250.3_FGT004	E-117	Zea mays	RNA.regulation of transcription.C2H2 zinc finger family	Unclear	Genomic evidence:microarray data	0.557644	0.984695	0.721088	-3.12907
Traes_6AL_FEF586A96	AC205250.3_FGT004	2e-86	Zea mays	RNA.regulation of transcription.C2H2 zinc finger family	Unclear	Genomic evidence:microarray data	0.243071	-1.14693	-2.04884	-4.66855
Traes_6BL_0ADB45097	AC205250.3_FGT004	4e-98	Zea mays	RNA.regulation of transcription.C2H2 zinc finger family	Unclear	Genomic evidence:microarray data	0.226808	-1.57655	-2.87051	-3.66746
Traes_6DL_0EF6FCB35	AC205250.3_FGT004	E-176	Zea mays	RNA.regulation of transcription.C2H2 zinc finger family	Unclear	Genomic evidence:microarray data	0.0963113	-0.765867	-2.60417	-4.121
Traes_6DL_1EC4A77EE	AC205250.3_FGT004	0	Zea mays	RNA.regulation of transcription.C2H2 zinc finger family	Unclear	Genomic evidence:microarray data	0.507268	1.10175	0.90137	-0.483045
Traes_7AL_6A3AC2A57	AC205250.3_FGT004	E-123	Zea mays	RNA.regulation of transcription.C2H2 zinc finger family	Unclear	Genomic evidence:microarray data	0.915629	-2.89843	-4.49588	-6.26324
Traes_7AL_E5C2A90B0	AC205250.3_FGT004	E-106	Zea mays	RNA.regulation of transcription.C2H2 zinc finger family	Unclear	Genomic evidence:microarray data	0.777152	-3.14032	-5.40037	-6.36567
Traes_5AL_7ED9D05C5	AK368213.1	E-131	Hordeum vulgare	Transcription regulation:NAC	Unclear	Molecular evidence:Real-Time PCR	0.518183	1.67121	3.17788	6.55617
Traes_5BL_CC18CAD72	AK368213.1	0	Hordeum vulgare	Transcription regulation:NAC	Unclear	Molecular evidence:Real-Time PCR	0.910022	1.02441	3.19073	5.88664
Traes_5DL_D1D0CA79E	AK368213.1	0	Hordeum vulgare	Transcription regulation:NAC	Unclear	Molecular evidence:Real-Time PCR	0.554822	1.56843	2.86796	4.89671
Traes_1AL_D3485D1FF	AT1G08290.1	1e-65	Arabidopsis thaliana	Transcription regulation:C2H2	Unclear	Genomic evidence:microarray data	-0.267887	-0.360136	1.62853	2.46447
Traes_2BL_181C4AA28	AT1G47270.1	E-105	Arabidopsis thaliana	Transcription regulation:TLP	Unclear	Genomic evidence:microarray data	-0.143722	-0.221227	0.445091	-1.03505
Traes_2AL_436D234EE	AT1G47270.2	E-106	Arabidopsis thaliana	Transcription regulation:TLP	Unclear	Genomic evidence:microarray data	-0.334377	-0.587761	-0.549084	-1.57496
Traes_6DL_244C908B5	AT1G55110.1	4e-83	Arabidopsis thaliana	Transcription regulation:C2H3	Unclear	Genomic evidence:microarray data	0.025203	-0.0737748	1.05143	0.430749
Traes_7AL_15004C50A	AT1G68990.1	E-166	Arabidopsis thaliana	Transcription regulation	Unclear	Genomic evidence:microarray data	0.315964	-0.255824	-1.27466	-0.894137
Traes_7DL_72868CD1F	AT1G68990.1	0	Arabidopsis thaliana	Transcription regulation	Unclear	Genomic evidence:microarray data	0.427368	-0.00241992	-1.27156	-0.917576
Traes_2AL_61C5A2D03	AT1G71930.1	7e-60	Arabidopsis thaliana	Transcription regulation:NAC	Unclear	Molecular evidence:Real-Time PCR	0.491423	-0.86388	-2.37418	-4.76049
Traes_5BS_210B7C3A4	AT1G75410.2	9e-86	Arabidopsis thaliana	Transcription regulation:HB	Unclear	Genomic evidence:microarray data	-0.0817282	0.469681	1.51487	1.62372
Traes_5DS_8E2AF4F8B	AT1G75410.2	8e-86	Arabidopsis thaliana	Transcription regulation:HB	Unclear	Genomic evidence:microarray data	0.042569	0.45293	1.72375	1.58354
Traes_3B_5CB4803CD	AT2G16720.1	3e-67	Arabidopsis thaliana	Transcription regulation:MYB	Unclear	Genomic evidence:microarray data	-0.965818	-1.63815	0.0748303	1.82236
Traes_4AL_49A8E719D	AT2G17390.1	1e-99	Arabidopsis thaliana	Transcription regulation	Unclear	Genomic evidence:microarray data	-0.0800881	1.39513	0.241809	-0.122794
Traes_5BL_B66B801E5	AT2G17390.1	E-105	Arabidopsis thaliana	Transcription regulation	Unclear	Genomic evidence:microarray data	-0.0659871	0.958115	0.366179	-0.0931975
Traes_4DL_5BB7F31ED	AT2G35940.3	2e-81	Arabidopsis thaliana	Transcription regulation:HB	Uclear	Genomic evidence:microarray data	-0.0367508	0.306053	0.381686	-0.889647
Traes_1AS_F3EAEC435	AT2G38470.1	5e-94	Arabidopsis thaliana	Transcription regulation:WRKY	Unclear	Genomic evidence:microarray data	-0.40001	-2.80126	-1.09367	0.404877
Traes_1BS_EF67E5A24	AT2G38470.1	3e-97	Arabidopsis thaliana	Transcription regulation:WRKY	Unclear	Genomic evidence:microarray data	-0.277765	-3.44605	-0.798476	0.430664
Traes_1DS_A6733B734	AT2G38470.1	3e-93	Arabidopsis thaliana	Transcription regulation:WRKY	Unclear	Genomic evidence:microarray data	-0.362176	-2.8465	-0.93158	0.247116
Traes_3B_990298FF5	AT2G38470.1	E-101	Arabidopsis thaliana	Transcription regulation:WRKY	Unclear	Genomic evidence:microarray data	-1.43727	-4.56976	-3.83187	-2.33251
Traes_4AS_6EDD5ACF7	AT3G12250.1	E-135	Arabidopsis thaliana	Transcription regulation:bZIP	Unclear	Genomic evidence:microarray data	0.137688	0.0975084	1.09544	1.84714
Traes_4BL_DAFEC95DD	AT3G12250.1	E-135	Arabidopsis thaliana	Transcription regulation:bZIP	Unclear	Genomic evidence:microarray data	0.160528	-0.047485	0.937664	1.65158
Traes_4DL_73DC40D7B	AT3G12250.1	E-133	Arabidopsis thaliana	Transcription regulation:bZIP	Unclear	Genomic evidence:microarray data	0.164273	0.165251	1.19941	1.91235
Traes_5DL_5DCD9BA8C	AT3G48760.1	7e-97	Arabidopsis thaliana	Transcription regulation	Unclear	Genomic evidence:microarray data	0.0266876	0.834145	3.66675	-0.707491
Traes_1AL_A4B5C1474	AT3G51910.1	2e-67	Arabidopsis thaliana	Transcription regulation	Unclear	Genomic evidence:microarray data	-1.0091	1.16753	2.44281	1.17682
Traes_2AS_7BD3963BD	AT4G17230.1	E-131	Arabidopsis thaliana	Transcription regulation	Unclear	Genomic evidence:microarray data	-0.68735	-1.74356	-1.60561	-2.0097
Traes_2BS_D007D6598	AT4G17230.1	E-135	Arabidopsis thaliana	Transcription regulation	Unclear	Genomic evidence:microarray data	-0.638408	-1.30458	-1.61845	-2.20087
Traes_6DL_1ABE78799	AT4G28530.1	1e-62	Arabidopsis thaliana	Transcription regulation:NAC	Unclear	Genomic evidence:microarray data	-0.314884	1.07855	2.87268	6.52348
Traes_3B_6BDE5B957	AT5G16540.1	E-107	Arabidopsis thaliana	Transcription regulation:C2H2	Unclear	Molecular evidence:Real-Time PCR	-0.287534	0.156714	-0.69423	-1.18221
Traes_3AL_63E53F065	AT5G18650.1	2e-96	Arabidopsis thaliana	Transcription regulation	Unclear	Genomic evidence:microarray data	0.00308324	0.0543915	0.864501	1.77175
Traes_3B_6D66B909C	AT5G18650.1	3e-96	Arabidopsis thaliana	Transcription regulation	Unclear	Genomic evidence:microarray data	0.0979035	0.29799	1.32085	2.01003
Traes_3DL_64BF1EBCA	AT5G18650.1	4e-95	Arabidopsis thaliana	Transcription regulation	Unclear	Genomic evidence:microarray data	-0.0528143	-0.488859	0.164815	1.68994
Traes_1AL_0C41C44B1	AT5G24120.1	E-115	Arabidopsis thaliana	Transcription regulation	Unclear	Genomic evidence:microarray data	-0.144943	2.52866	1.81092	0.587771
Traes_5AL_852A1474C	AT5G24470.1	4e-63	Arabidopsis thaliana	Transcription regulation	Unclear	Genomic evidence:microarray data	-0.192624	0.14607	1.5454	0.92704
Traes_5DL_8CE2482E6	AT5G24470.1	4e-67	Arabidopsis thaliana	Transcription regulation	Unclear	Genomic evidence:microarray data	0.0418465	-0.0397951	1.90192	1.60204
Traes_2BS_00566A85C	AT5G39610.1	3e-66	Arabidopsis thaliana	Transcription regulation:NAC	Promote	Genetic evidence:Mutant; Genomic evidence:microarray data	0.552729	1.31599	4.7022	4.88621
Traes_1AL_55E4D53AF	AT5G46910.1	0	Arabidopsis thaliana	Transcription regulation:JMJ	Unclear	Genomic evidence:microarray data	0.0281466	-3.30349	-3.1474	-2.03226
Traes_5BS_95A52A87F	AT5G49620.1	8e-69	Arabidopsis thaliana	Transcription regulation	Unclear	Genomic evidence:microarray data	0.359622	-0.0516031	1.16096	5.51666
Traes_5DS_DE2C70E4C	AT5G49620.1	1e-68	Arabidopsis thaliana	Transcription regulation	Unclear	Genomic evidence:microarray data	0.480047	-1.26704	1.54699	5.71231
Traes_6AS_B2C4072A0	AT5G60580.1	2e-54	Arabidopsis thaliana	Transcription regulation	Unclear	Genomic evidence:microarray data	-0.0462829	0.666603	-1.56839	-3.02429
Traes_2BS_4818EA1FF	AT5G60910.1	3e-58	Arabidopsis thaliana	Transcription regulation:MADS	Promote	Genetic evidence:Mutant	-0.131665	0.0953339	-0.677603	-1.89263
Traes_2AS_7AAACC26B	AT5G61430.1	6e-66	Arabidopsis thaliana	Transcription regulation:NAC	Unclear	Genomic evidence:microarray data	0.524749	1.13742	4.41908	4.41869
Traes_4DL_F512146B2	AT5G63470.2	3e-69	Arabidopsis thaliana	Transcription regulation:CCAAT-HAP5	Unclear	Molecular evidence:Real-Time PCR	-0.558452	-0.635911	-1.7437	-4.10238
Traes_1AL_C4FA8404A	AT5G64060.1	9e-69	Arabidopsis thaliana	Transcription regulation	Unclear	Genomic evidence:microarray data	0.0692936	0.034148	0.514719	1.39872
Traes_2AL_8A23618BA	AT5G64530.1	1e-53	Arabidopsis thaliana	Transcription regulation:NAC	Unclear	Genomic evidence:microarray data	0	1.63861	3.32403	9.22063
Traes_2BL_9528AAD7C	AT5G65210.5	4e-88	Arabidopsis thaliana	Transcription regulation	Unclear	Genomic evidence:microarray data	-0.156163	0.286137	1.55426	1.87657
Traes_6AS_6F89CC969	DQ869673.1	0	Triticum turgidum	Transcriptional regulation:NAC	Promote	Genetic evidence:Transgene and mutant	0.613084	4.25224	4.69382	4.36039
Traes_6DS_90A627C3F	DQ869673.1	1e-95	Triticum turgidum	Transcriptional regulation:NAC	Promote	Genetic evidence:Transgene and mutant	1.77945	4.6082	5.76935	5.96083
Traes_4AS_CE4C6A8A2	GRMZM2G009892_T02	0	Zea mays	RNA.regulation of transcription.NAC domain transcription factor family	Unclear	Genomic evidence:microarray data	0.965033	0.141572	0.239935	2.84279
Traes_2AL_3F1A87585	GRMZM2G041462_T01	E-113	Zea mays	RNA.regulation of transcription.HB,Homeobox transcription factor family	Unclear	Genomic evidence:microarray data	-1.38842	1.01404	2.66695	5.65676
Traes_2BL_36B344F6B	GRMZM2G041462_T01	6e-80	Zea mays	RNA.regulation of transcription.HB,Homeobox transcription factor family	Unclear	Genomic evidence:microarray data	0.207435	2.77196	7.90844	8.06134
Traes_2BL_C3533A6D6	GRMZM2G041462_T01	5e-78	Zea mays	RNA.regulation of transcription.HB,Homeobox transcription factor family	Unclear	Genomic evidence:microarray data	-1.35635	1.02222	8.33474	7.57022
Traes_2BL_DD9CF6B84	GRMZM2G041462_T01	E-141	Zea mays	RNA.regulation of transcription.HB,Homeobox transcription factor family	Unclear	Genomic evidence:microarray data	-0.947949	0.608222	1.73708	5.49711
Traes_2DL_9FC19CCF8	GRMZM2G041462_T01	2e-70	Zea mays	RNA.regulation of transcription.HB,Homeobox transcription factor family	Unclear	Genomic evidence:microarray data	-0.359386	2.39566	9.09206	8.43989
Traes_2BL_699DB5420	GRMZM2G153754_T01	E-118	Zea mays	RNA.regulation of transcription.CPP(Zn),CPP1-related transcription factor family	Unclear	Genomic evidence:microarray data	-0.42438	-0.247285	-0.915526	-2.37948
Traes_3B_CDA5ADD75	GSMUA_Achr10T15290_001	E-113	Musa acuminata	Transcription factor and regulator	Unclear	Molecular evidence:RNA sequencing	-0.0371568	-0.540582	0.290365	0.671117
Traes_3B_8BB0A0443	GSMUA_Achr2T09080_001	2e-91	Musa acuminata	Transcription factor and regulator	Unclear	Molecular evidence:RNA sequencing	-1.62671	-0.674979	0.971385	3.37293
Traes_2BS_10A8CAB27	GSMUA_Achr6T09870_001	3e-73	Musa acuminata	Transcription factor and regulator	Unclear	Molecular evidence:RNA sequencing	0.142111	-0.41816	4.03413	1.37884
Traes_2BS_C116E5668	GSMUA_Achr6T32320_001	4e-76	Musa acuminata	Transcription factor and regulator	Unclear	Molecular evidence:RNA sequencing	-0.456693	1.43731	4.18683	4.77306
Traes_2DS_85FE89BC5	GSMUA_Achr6T32320_001	4e-48	Musa acuminata	Transcription factor and regulator	Unclear	Molecular evidence:RNA sequencing	0.527107	2.12446	5.80116	6.17247
Traes_4DL_F0BE36C9D	GSMUA_Achr6T32320_001	2e-87	Musa acuminata	Transcription factor and regulator	Unclear	Molecular evidence:RNA sequencing	1.05018	1.48611	3.34741	4.26329
Traes_5BL_8C181ECA8	GSMUA_Achr7T02770_001	5e-53	Musa acuminata	Transcription factor and regulator	Unclear	Molecular evidence:RNA sequencing	-0.384324	0.252404	-1.96199	-2.05333
Traes_4AS_FA7E65184	GSMUA_Achr7T15090_001	E-146	Musa acuminata	Transcription factor and regulator	Unclear	Molecular evidence:RNA sequencing	0.0348128	0.791644	2.25491	2.98544
Traes_4BL_AB2636FB0	GSMUA_Achr7T15090_001	E-146	Musa acuminata	Transcription factor and regulator	Unclear	Molecular evidence:RNA sequencing	-0.485282	0.19158	0.475342	1.97427
Traes_4DL_3849A9A5F	GSMUA_Achr7T15090_001	E-151	Musa acuminata	Transcription factor and regulator	Unclear	Molecular evidence:RNA sequencing	-0.573173	-0.0139548	0.0776569	1.04797
Traes_2AS_E1BC5FF2C	GSMUA_Achr8T06850_001	1e-52	Musa acuminata	Transcription factor and regulator	Unclear	Molecular evidence:RNA sequencing	0.161706	1.46121	1.34523	1.89635
Traes_2BS_EB80B2584	GSMUA_Achr8T06850_001	1e-52	Musa acuminata	Transcription factor and regulator	Unclear	Molecular evidence:RNA sequencing	0.135037	1.58258	1.50151	2.15137
Traes_2BL_46E59998A1	GSMUA_AchrUn_randomT04680_001	E-136	Musa acuminata	Transcription factor and regulator	Unclear	Molecular evidence:RNA sequencing	-0.584345	-0.0439229	0.722029	1.47149
Traes_3B_913263509	LOC_Os01g66120.1	4e-69	Oryza sativa	Transcription regulation:NAC	Unclear	Molecular evidence: SSH, Northern blot and RT-PCR	-0.199937	-0.52924	0.481889	1.38777
Traes_6BS_81C9A2EC2	LOC_Os02g03840.1	E-154	Oryza sativa	Transcription regulation	Unclear	Molecular evidence: SSH, Northern blot and RT-PCR	-0.220349	0.449195	1.14002	1.01752
Traes_3B_D59C1CA8B	LOC_Os03g50290.1	E-119	Oryza sativa	Transcription regulation:Regulatory genes	Unclear	Molecular evidence: SSH/Northern blot/RT-PCR	-0.125564	-0.132224	0.203083	1.07394
Traes_3DS_63471506E	LOC_Os03g50290.1	1e-74	Oryza sativa	Transcription regulation:Regulatory genes	Unclear	Molecular evidence: SSH/Northern blot/RT-PCR	-0.168178	0.320336	0.189972	1.53334
Traes_5BL_A87DEB201	LOC_Os03g55164.1	E-170	Oryza sativa	Transcription regulation:WRKY	Unclear	Molecular evidence: SSH/Northern blot/RT-PCR	0.178801	-0.540417	-1.1209	-1.3921
Traes_7DL_0CEFCB39D	LOC_Os06g51220.1	5e-66	Oryza sativa	Transcription regulation:Regulatory genes	Unclear	Molecular evidence: SSH/Northern blot/RT-PCR	-0.228916	1.16694	1.38039	1.01127
Traes_4AL_A0565AC4C	LOC_Os08g14450.1	0	Oryza sativa	Transcription regulation:Sigma-70	Unclear	Molecular evidence: SSH/Northern blot/RT-PCR	-0.235157	-0.184624	-1.36991	-2.35682
Traes_4DL_B8D22E4C2	LOC_Os08g14450.1	1e-58	Oryza sativa	Transcription regulation:Sigma-70	Unclear	Molecular evidence: SSH/Northern blot/RT-PCR	-0.0147002	-0.039178	-1.80166	-2.31407
Traes_5BL_B1F704307	LOC_Os08g14450.1	0	Oryza sativa	Transcription regulation:Sigma-71	Unclear	Molecular evidence: SSH/Northern blot/RT-PCR	-0.271261	-0.0776068	-1.03786	-1.41614
Traes_5DL_8DC4CC983	LOC_Os08g14450.1	0	Oryza sativa	Transcription regulation:Sigma-72	Unclear	Molecular evidence: SSH/Northern blot/RT-PCR	-0.186593	0.247701	-0.344792	-1.17712
Transport
Traes_7AS_E1EA01D49	AC182482.3_FGT003	0	Zea mays	Transport.Metal	Unclear	Genomic evidence:microarray data	0.194196	-0.0872047	0.179114	2.86598
Traes_7BS_CF247665F	AC182482.3_FGT003	0	Zea mays	Transport.Metal	Unclear	Genomic evidence:microarray data	0.0928081	-0.260741	0.696866	4.54475
Traes_7DS_D89F89766	AC182482.3_FGT003	0	Zea mays	Transport.Metal	Unclear	Genomic evidence:microarray data	-0.306952	-0.364775	1.43128	7.42066
Traes_2DS_677AECF17	AT1G15520.1	0	Arabidopsis thaliana	Nutrient recycling:ABC transporter	Unclear	Genomic evidence:microarray data	2.25194	0.638664	-0.790321	-3.30159
Traes_3B_4434107C4	AT1G15520.1	0	Arabidopsis thaliana	Nutrient recycling:ABC transporter	Unclear	Genomic evidence:microarray data	0.563512	-1.54371	-1.01044	-0.854838
Traes_3DL_920C6D20E	AT1G15520.1	0	Arabidopsis thaliana	Nutrient recycling:ABC transporter	Unclear	Genomic evidence:microarray data	0.500333	-1.82783	-1.16298	-1.09329
Traes_5BL_AAE5B3832	AT1G15520.1	0	Arabidopsis thaliana	Nutrient recycling:ABC transporter	Unclear	Genomic evidence:microarray data	1.48884	0.793088	2.35366	3.5614
Traes_5DL_A7D264077	AT1G15520.1	0	Arabidopsis thaliana	Nutrient recycling:ABC transporter	Unclear	Genomic evidence:microarray data	1.24589	-0.84388	0.642739	1.79272
Traes_5DL_F292F9EA4	AT1G15520.1	E-121	Arabidopsis thaliana	Nutrient recycling:ABC transporter	Unclear	Genomic evidence:microarray data	1.2787	-0.654397	0.707691	1.95567
Traes_7AL_7E1C0EDEE	AT1G15520.1	0	Arabidopsis thaliana	Nutrient recycling:ABC transporter	Unclear	Genomic evidence:microarray data	0.58202	0.0931368	2.59624	4.20594
Traes_7DL_CCE27DF79	AT1G15520.1	0	Arabidopsis thaliana	Nutrient recycling:ABC transporter	Unclear	Genomic evidence:microarray data	0.744028	-2.58119	0.720409	2.33013
Traes_5DS_CA7EFFF42	AT1G31830.1	E-130	Arabidopsis thaliana	Nutrient recycling:Amino acid transport	Unclear	Genomic evidence:microarray data	0.182566	-0.0927887	0.339127	0.967297
Traes_2DS_6CC925A22	AT1G59870.1	E-136	Arabidopsis thaliana	Transporter	Unclear	Molecular evidence: SSH and Northern	2.00102	0.223981	-0.903424	-3.59292
Traes_7AL_7BD10B6C7	AT1G59870.1	0	Arabidopsis thaliana	Transporter	Unclear	Molecular evidence: SSH and Northern	0.457881	0.464538	1.705	2.30184
Traes_2AL_CF862CF2D	AT1G64780.1	0	Arabidopsis thaliana	Transport	Unclear	Genomic evidence:microarray data	-0.274819	0.536799	-1.66086	-0.50942
Traes_1AL_1A7B215EC	AT1G78130.1	E-132	Arabidopsis thaliana	Transport	Unclear	Genomic evidence:microarray data	0.108354	-0.0978023	2.28271	1.91021
Traes_6AS_4F10F05D2	AT1G80300.1	0	Arabidopsis thaliana	Transport	Unclear	Genomic evidence:microarray data	0.37973	0.494709	1.23634	1.83704
Traes_6BS_A75F2A287	AT1G80300.1	E-157	Arabidopsis thaliana	Transport	Unclear	Genomic evidence:microarray data	0.457222	0.295636	0.927166	2.44414
Traes_6DS_764EC2D49	AT1G80300.1	0	Arabidopsis thaliana	Transport	Unclear	Genomic evidence:microarray data	0.358617	0.45813	1.82728	2.7302
Traes_2AL_FB0D6DF8B	AT1G80310.1	E-148	Arabidopsis thaliana	Transport	Unclear	Genomic evidence:microarray data	0.624464	2.75446	3.49271	3.27451
Traes_2BL_01647D965	AT1G80310.1	E-157	Arabidopsis thaliana	Transport	Unclear	Genomic evidence:microarray data	0.515589	1.19341	2.58754	1.97699
Traes_4AL_59D5504B1	AT2G02040.1	0	Arabidopsis thaliana	Transport	Unclear	Genomic evidence:microarray data	0.0329665	0.35099	1.33231	2.29951
Traes_4BS_15871AAF4	AT2G02040.1	0	Arabidopsis thaliana	Transport	Unclear	Genomic evidence:microarray data	0.105493	0.444063	1.92266	3.04672
Traes_4DS_42A657188	AT2G02040.1	0	Arabidopsis thaliana	Transport	Unclear	Genomic evidence:microarray data	-0.0722988	0.202837	0.980467	1.9657
Traes_1AL_670C92349	AT2G02040.1	E-101	Arabidopsis thaliana	Transport	Unclear	Genomic evidence:microarray data	0.260381	0.265904	1.58929	1.36988
Traes_4AS_5828A4E4D	AT2G39970.1	E-124	Arabidopsis thaliana	Transport	Unclear	Genomic evidence:microarray data	-0.0743916	0.209792	1.59272	2.52473
Traes_4DL_507255E33	AT2G39970.1	E-117	Arabidopsis thaliana	Transport	Unclear	Genomic evidence:microarray data	0.0565507	0.145716	2.51094	3.09729
Traes_6DL_D8C428186	AT2G41190.1	E-177	Arabidopsis thaliana	Transporter	Unclear	Genomic evidence:microarray data	0.537521	1.75229	2.88775	3.95824
Traes_2BS_62A407EAB	AT2G41220.1	0	Arabidopsis thaliana	Nutrient recycling:N mobilization and transport	Unclear	Genomic evidence:microarray data	-0.0439572	-0.0699675	-0.49877	-1.18877
Traes_2DS_9D4521586	AT2G41220.1	0	Arabidopsis thaliana	Nutrient recycling:N mobilization and transport	Unclear	Genomic evidence:microarray data	-0.0506304	-0.249831	-0.519814	-0.983515
Traes_1AL_FEC7F80A2	AT3G05290.1	E-103	Arabidopsis thaliana	Transmembrane transporter activity	Unclear	Genomic evidence:microarray data	0.547073	0.0624524	1.47372	2.486
Traes_1DL_2B11C55B9	AT3G05290.1	E-117	Arabidopsis thaliana	Transmembrane transporter activity	Unclear	Genomic evidence:microarray data	0.678583	-0.130639	1.45342	2.32842
Traes_3AS_FD018268B	AT3G13100.1	0	Arabidopsis thaliana	Nutrient recycling:ABC transporter	Unclear	Genomic evidence:microarray data	0.567748	-0.424244	-0.794373	-1.22684
Traes_3B_9A61DFBAA	AT3G13100.1	0	Arabidopsis thaliana	Nutrient recycling:ABC transporter	Unclear	Genomic evidence:microarray data	1.20307	0.158187	0.55775	0.123857
Traes_3DS_EE5D85DE2	AT3G13100.1	0	Arabidopsis thaliana	Nutrient recycling:ABC transporter	Unclear	Genomic evidence:microarray data	1.00714	-0.042978	-1.19869	-1.85741
Novel00303	AT4G15530.6	5e-68	Arabidopsis thaliana	Nutrient recycling:Nitrogen remobilization	Promote	Genetic evidence:Transgene; Genomic evidence:microarray data	-0.243471	-0.282808	1.14699	2.18564
Traes_1AL_5738CCBF8	AT4G15530.6	3e-45	Arabidopsis thaliana	Nutrient recycling:Nitrogen remobilization	Promote	Genetic evidence:Transgene; Genomic evidence:microarray data	-0.0767786	-0.251907	1.19306	2.23898
Traes_1AL_931BB17DA	AT4G15530.6	3e-87	Arabidopsis thaliana	Nutrient recycling:Nitrogen remobilization	Promote	Genetic evidence:Transgene; Genomic evidence:microarray data	-0.387556	-0.338232	0.997416	3.07293
Traes_1AL_E5E41283E	AT4G15530.6	E-169	Arabidopsis thaliana	Nutrient recycling:Nitrogen remobilization	Promote	Genetic evidence:Transgene; Genomic evidence:microarray data	-0.22311	-0.419224	1.1392	2.14737
Traes_1BL_AAC4D956E	AT4G15530.6	E-108	Arabidopsis thaliana	Nutrient recycling:Nitrogen remobilization	Promote	Genetic evidence:Transgene; Genomic evidence:microarray data	-0.17617	-0.14215	1.28351	2.33438
Traes_1DL_88D2ACD05	AT4G15530.6	4e-97	Arabidopsis thaliana	Nutrient recycling:Nitrogen remobilization	Promote	Genetic evidence:Transgene; Genomic evidence:microarray data	-0.203741	-0.301406	1.01043	2.14899
Traes_1DL_925B198C1	AT4G15530.6	E-115	Arabidopsis thaliana	Nutrient recycling:Nitrogen remobilization	Promote	Genetic evidence:Transgene; Genomic evidence:microarray data	-0.15312	-0.527713	0.702301	2.17382
Traes_3AL_B137CC856	AT5G11520.1	E-177	Arabidopsis thaliana	Nutrient recycling:Amino acid transport	Unclear	Molecular evidence:DDRT-PCR; Molecular evidence: SSH and Northern	-0.0885447	0.399019	1.33182	3.53623
Traes_3B_0CDF6A16D	AT5G11520.1	0	Arabidopsis thaliana	Nutrient recycling:Amino acid transport	Unclear	Molecular evidence:DDRT-PCR; Molecular evidence: SSH and Northern	-0.035192	0.449256	1.70901	3.63291
Traes_3DL_870617108	AT5G11520.1	E-176	Arabidopsis thaliana	Nutrient recycling:Amino acid transport	Unclear	Molecular evidence:DDRT-PCR; Molecular evidence: SSH and Northern	0.0605576	0.49149	1.06716	2.9811
Traes_7AL_78692505E	AT5G11520.1	1e-95	Arabidopsis thaliana	Nutrient recycling:Amino acid transport	Unclear	Molecular evidence:DDRT-PCR; Molecular evidence: SSH and Northern	-0.704919	-0.030907	-0.218127	1.7673
Traes_7BL_0029CE4EA	AT5G11520.1	1e-96	Arabidopsis thaliana	Nutrient recycling:Amino acid transport	Unclear	Molecular evidence:DDRT-PCR; Molecular evidence: SSH and Northern	0.0625238	0.0323225	2.62912	3.20097
Traes_7DL_CE994259E	AT5G11520.1	E-113	Arabidopsis thaliana	Nutrient recycling:Amino acid transport	Unclear	Molecular evidence:DDRT-PCR; Molecular evidence: SSH and Northern	-0.172843	-0.0331624	1.25089	2.49323
Traes_4AS_25854CBC8	GRMZM2G156599_T01	E-151	Zea mays	Transport.Peptides and oligopeptides	Unclear	Genomic evidence:microarray data	-0.145085	-0.328903	0.394575	1.31782
Traes_4BL_1E24DA78C	GRMZM2G156599_T01	E-153	Zea mays	Transport.Peptides and oligopeptides	Unclear	Genomic evidence:microarray data	-0.355346	-0.354125	0.222045	1.60873
Traes_4DL_01E02A089	GRMZM2G156599_T01	E-152	Zea mays	Transport.Peptides and oligopeptides	Unclear	Genomic evidence:microarray data	-0.34149	-0.129336	0.407312	1.82136
Traes_6AL_61DEC025F	GRMZM2G156599_T01	0	Zea mays	Transport.Peptides and oligopeptides	Unclear	Genomic evidence:microarray data	0.222017	0.961218	2.73118	4.85532
Traes_6BL_F71695F5C	GRMZM2G156599_T01	E-174	Zea mays	Transport.Peptides and oligopeptides	Unclear	Genomic evidence:microarray data	0.320096	0.49684	2.27645	4.29653
Traes_6DL_833E1F5E1	GRMZM2G156599_T01	0	Zea mays	Transport.Peptides and oligopeptides	Unclear	Genomic evidence:microarray data	-0.10996	-0.0353137	1.52563	3.65284
Traes_5BL_E274E95EE	GRMZM2G451792_T01	0	Zea mays	Transport.ABC transporters and multidrug resistance systems	Unclear	Genomic evidence:microarray data	0.0849742	-0.157499	-0.0756309	3.59402
Traes_3AS_D054FE93E	GSMUA_Achr10T14230_001	E-133	Musa acuminata	Transport	Unclear	Molecular evidence:RNA sequencing	-0.23994	-0.478941	-0.80228	-2.19293
Traes_3B_8E66C933E	GSMUA_Achr10T14230_001	E-129	Musa acuminata	Transport	Unclear	Molecular evidence:RNA sequencing	-0.129322	-0.683863	-0.89957	-2.40458
Traes_3DS_D1031AFC6	GSMUA_Achr10T14230_001	E-121	Musa acuminata	Transport	Unclear	Molecular evidence:RNA sequencing	-0.283123	-0.784727	-0.871239	-2.87434
Traes_5DL_C15ECE24E	GSMUA_Achr10T23780_001	E-120	Musa acuminata	Transport	Unclear	Molecular evidence:RNA sequencing	0.432917	2.35429	4.48418	5.29832
Traes_2AL_956419DF5	GSMUA_Achr11T03140_001	0	Musa acuminata	Transport	Unclear	Molecular evidence:RNA sequencing	0.512538	-0.335629	0.385782	2.37484
Traes_2BL_D4DBD99CD	GSMUA_Achr11T03140_001	0	Musa acuminata	Transport	Unclear	Molecular evidence:RNA sequencing	0.737884	1.6602	2.72342	4.23112
Traes_2DL_0DD946101	GSMUA_Achr11T03140_001	0	Musa acuminata	Transport	Unclear	Molecular evidence:RNA sequencing	0.936658	0.734669	1.79052	2.91329
Traes_6AL_2B4A305CD	GSMUA_Achr11T03140_001	0	Musa acuminata	Transport	Unclear	Molecular evidence:RNA sequencing	0.335252	-0.589513	4.55006	1.59413
Traes_6BL_005314A5D	GSMUA_Achr11T03140_001	0	Musa acuminata	Transport	Unclear	Molecular evidence:RNA sequencing	0.193248	0.497976	4.13199	1.11175
Traes_6DL_20A343A96	GSMUA_Achr11T03140_001	0	Musa acuminata	Transport	Unclear	Molecular evidence:RNA sequencing	-0.250348	-0.649822	4.15192	0.446872
Traes_7DS_02C6AD24D	GSMUA_Achr11T03140_001	0	Musa acuminata	Transport	Unclear	Molecular evidence:RNA sequencing	0.218808	1.32861	-0.694588	-1.17288
Traes_4BS_83DF7B31C	GSMUA_Achr11T08780_001	7e-96	Musa acuminata	Transport	Unclear	Molecular evidence:RNA sequencing	-0.0472048	-0.457217	-1.19269	0.614108
Traes_2AS_DE0D48CF6	GSMUA_Achr11T20420_001	0	Musa acuminata	Transport	Unclear	Molecular evidence:RNA sequencing	0.173751	0.385729	1.05376	1.55583
Traes_2BS_ECB89174C	GSMUA_Achr11T20420_001	0	Musa acuminata	Transport	Unclear	Molecular evidence:RNA sequencing	0.239946	0.255521	1.143	1.65656
Traes_2DS_42980B984	GSMUA_Achr11T20420_001	0	Musa acuminata	Transport	Unclear	Molecular evidence:RNA sequencing	0.266663	-0.192689	0.767621	2.29583
Traes_2AL_66220D19D	GSMUA_Achr1T26380_001	E-104	Musa acuminata	Transport	Unclear	Molecular evidence:RNA sequencing	-0.160708	1.67319	1.54943	1.82016
Traes_2AL_DD284DEA9	GSMUA_Achr1T26380_001	E-104	Musa acuminata	Transport	Unclear	Molecular evidence:RNA sequencing	-0.232041	1.44701	0.768279	1.47693
Traes_2BL_C1D1054B1	GSMUA_Achr1T26380_001	3e-98	Musa acuminata	Transport	Unclear	Molecular evidence:RNA sequencing	-0.0330083	1.564	0.606487	1.29483
Traes_2BL_D274D68D2	GSMUA_Achr1T26380_001	E-104	Musa acuminata	Transport	Unclear	Molecular evidence:RNA sequencing	0.253001	1.64457	1.67092	1.85145
Traes_5BL_CC5BEE88D	GSMUA_Achr1T26380_001	3e-98	Musa acuminata	Transport	Unclear	Molecular evidence:RNA sequencing	-0.614441	-0.697288	-3.21051	-1.57642
Traes_5DL_8410302DB	GSMUA_Achr1T26380_001	2e-98	Musa acuminata	Transport	Unclear	Molecular evidence:RNA sequencing	-0.86097	-0.75804	-2.08887	-1.18962
Traes_6AL_00EDAC7DB	GSMUA_Achr1T26380_001	4e-89	Musa acuminata	Transport	Unclear	Molecular evidence:RNA sequencing	-0.142458	1.93157	1.97609	1.78354
Traes_6AL_23B31796F	GSMUA_Achr1T26380_001	E-105	Musa acuminata	Transport	Unclear	Molecular evidence:RNA sequencing	-0.259954	0.973839	1.88072	2.55071
Traes_6AL_A27064D17	GSMUA_Achr1T26380_001	8e-67	Musa acuminata	Transport	Unclear	Molecular evidence:RNA sequencing	-0.0954912	1.58332	1.02297	1.05143
Traes_6AS_D9FD6E723	GSMUA_Achr1T26380_001	4e-93	Musa acuminata	Transport	Unclear	Molecular evidence:RNA sequencing	1.60566	3.1759	3.38888	5.20373
Traes_6DL_368664EA1	GSMUA_Achr1T26380_001	1e-58	Musa acuminata	Transport	Unclear	Molecular evidence:RNA sequencing	0.018256	1.34062	0.732206	0.723221
Traes_2BL_213FDF755	GSMUA_Achr3T11960_001	0	Musa acuminata	Transport	Unclear	Molecular evidence:RNA sequencing	-0.0644312	-0.345474	0.436654	1.9418
Traes_2AS_4CA7607E5	GSMUA_Achr3T23620_001	5e-61	Musa acuminata	Transport	Unclear	Molecular evidence:RNA sequencing	0.436232	2.03574	2.81454	2.96568
Traes_2DL_039832D76	GSMUA_Achr4T20780_001	5e-70	Musa acuminata	Transport	Unclear	Molecular evidence:RNA sequencing	0.0817216	1.87029	1.63512	1.66203
Traes_2DL_08ED30064	GSMUA_Achr4T20780_001	2e-68	Musa acuminata	Transport	Unclear	Molecular evidence:RNA sequencing	-0.0870325	1.51549	0.963074	1.55619
Traes_6AL_D50E09BFC	GSMUA_Achr4T20780_001	1e-83	Musa acuminata	Transport	Unclear	Molecular evidence:RNA sequencing	-0.236558	1.86123	1.79382	1.59133
Traes_2AS_9DE16F020	GSMUA_Achr6T00610_001	E-179	Musa acuminata	Transport	Unclear	Molecular evidence:RNA sequencing	0.509099	-0.0740355	-0.259515	2.03172
Traes_4AS_5C4ADB91B	GSMUA_Achr6T23440_001	4e-93	Musa acuminata	Transport	Unclear	Molecular evidence:RNA sequencing	-0.0289662	1.9465	4.48072	4.42398
Traes_4BL_9E3F7A2E4	GSMUA_Achr6T23440_001	2e-56	Musa acuminata	Transport	Unclear	Molecular evidence:RNA sequencing	-0.0689643	0.582247	3.91404	3.12352
Traes_4DL_E5521D4C1	GSMUA_Achr6T23440_001	4e-94	Musa acuminata	Transport	Unclear	Molecular evidence:RNA sequencing	0.0969378	1.1007	4.19157	4.0189
Traes_2BL_F72ED64FB	GSMUA_Achr6T35440_001	E-120	Musa acuminata	Transport	Unclear	Molecular evidence:RNA sequencing	-1.26969	-0.731796	2.36558	5.28881
Traes_7AS_735085EFB	GSMUA_Achr6T36590_001	0	Musa acuminata	Transport	Unclear	Molecular evidence:RNA sequencing	0.456851	-1.96822	1.56037	0.480714
Traes_4AL_170182078	GSMUA_Achr7T05830_001	0	Musa acuminata	Transport	Unclear	Molecular evidence:RNA sequencing	0.453006	-0.393913	1.43897	4.1953
Traes_7AS_9A20F47CE	GSMUA_Achr7T05830_001	E-158	Musa acuminata	Transport	Unclear	Molecular evidence:RNA sequencing	0.663504	0.710932	2.59535	5.71304
Traes_7DS_748C4CFCA	GSMUA_Achr7T05830_001	0	Musa acuminata	Transport	Unclear	Molecular evidence:RNA sequencing	-0.155577	0.45344	1.15396	3.57399
Traes_3AL_D57BE8789	GSMUA_Achr7T09310_001	2e-79	Musa acuminata	Transport	Unclear	Molecular evidence:RNA sequencing	0.542034	-0.22527	2.87802	2.05022
Traes_3B_21BBB6A08	GSMUA_Achr7T09310_001	6e-92	Musa acuminata	Transport	Unclear	Molecular evidence:RNA sequencing	0.57278	-0.420219	2.69984	1.81203
Traes_3DL_9E275293A	GSMUA_Achr7T09310_001	4e-80	Musa acuminata	Transport	Unclear	Molecular evidence:RNA sequencing	0.644048	-0.14805	2.43916	1.97369
Traes_1BS_7F56C8B50	GSMUA_Achr7T15550_001	E-143	Musa acuminata	Transport	Unclear	Molecular evidence:RNA sequencing	0.100766	-0.0172173	1.19299	1.73645
Traes_2AL_987F244D2	GSMUA_Achr7T20060_001	0	Musa acuminata	Transport	Unclear	Molecular evidence:RNA sequencing	0.744599	-1.50673	1.56027	1.4935
Traes_2BL_D0C7517E1	GSMUA_Achr7T20060_001	0	Musa acuminata	Transport	Unclear	Molecular evidence:RNA sequencing	0.764611	-1.87316	-0.0230708	1.31946
Traes_2DL_74E015594	GSMUA_Achr7T20060_001	E-157	Musa acuminata	Transport	Unclear	Molecular evidence:RNA sequencing	0.907568	-1.81791	1.22178	1.787
Traes_5AL_B64648FE6	GSMUA_Achr7T20060_001	0	Musa acuminata	Transport	Unclear	Molecular evidence:RNA sequencing	0.169163	0.327806	2.37857	1.78698
Traes_5BL_ECFF2CD6E	GSMUA_Achr7T20060_001	1e-89	Musa acuminata	Transport	Unclear	Molecular evidence:RNA sequencing	0.166463	0.780138	2.16653	1.71429
Traes_5BL_F43BDBCB9	GSMUA_Achr7T20060_001	0	Musa acuminata	Transport	Unclear	Molecular evidence:RNA sequencing	0.0776454	0.759692	2.1347	1.6217
Traes_5DL_B68F9C403	GSMUA_Achr7T20060_001	0	Musa acuminata	Transport	Unclear	Molecular evidence:RNA sequencing	0.0178383	0.523501	2.30273	2.09349
Traes_2AS_01BF89DD2	GSMUA_Achr7T22120_001	0	Musa acuminata	Transport	Unclear	Molecular evidence:RNA sequencing	-0.303584	1.11759	0.612717	0.289566
Traes_4AS_6E6C9CC37	GSMUA_Achr7T22640_001	E-152	Musa acuminata	Transport	Unclear	Molecular evidence:RNA sequencing	0.729906	0.190966	0.811453	1.58971
Traes_4BL_80341C1C2	GSMUA_Achr7T22640_001	E-151	Musa acuminata	Transport	Unclear	Molecular evidence:RNA sequencing	0.66951	0.129734	1.11131	2.082
Traes_4DL_C9CBE5A1D	GSMUA_Achr7T22640_001	E-139	Musa acuminata	Transport	Unclear	Molecular evidence:RNA sequencing	0.421373	0.325655	1.21469	1.77297
Traes_5AL_10F6D3D4C	GSMUA_Achr7T24830_001	E-179	Musa acuminata	Transport	Unclear	Molecular evidence:RNA sequencing	0.695638	0.495713	0.451814	3.0027
Traes_5BL_1EA6085DB	GSMUA_Achr7T24830_001	0	Musa acuminata	Transport	Unclear	Molecular evidence:RNA sequencing	0.397851	0.348245	0.138969	1.48626
Traes_5DL_D615772DD	GSMUA_Achr7T24830_001	0	Musa acuminata	Transport	Unclear	Molecular evidence:RNA sequencing	0.170433	-0.437279	-0.152608	2.22326
Traes_4AL_37B6D6FC3	GSMUA_Achr8T03230_001	E-148	Musa acuminata	Transport	Unclear	Molecular evidence:RNA sequencing	0.339602	0.229617	-0.488202	-1.81685
Traes_4BS_165612CC9	GSMUA_Achr8T03230_001	E-157	Musa acuminata	Transport	Unclear	Molecular evidence:RNA sequencing	0.166856	0.447915	-0.433488	-1.40119
Traes_2AL_BE05B34FF	GSMUA_Achr8T06930_001	6e-95	Musa acuminata	Transport	Unclear	Molecular evidence:RNA sequencing	0.822219	1.29819	2.63542	3.22973
Traes_2BL_A1BCBD2BE	GSMUA_Achr8T06930_001	E-103	Musa acuminata	Transport	Unclear	Molecular evidence:RNA sequencing	0.169366	0.538925	1.54113	2.06363
Traes_2DL_D0582A4B1	GSMUA_Achr8T06930_001	2e-91	Musa acuminata	Transport	Unclear	Molecular evidence:RNA sequencing	0.201347	-0.558675	-0.400297	-0.671601
Traes_3B_A4B3E963C	GSMUA_Achr8T09450_001	E-123	Musa acuminata	Transport	Unclear	Molecular evidence:RNA sequencing	0.252678	0.744037	1.53484	1.27912
Traes_4BS_1DCF82CB7	GSMUA_Achr8T21650_001	E-173	Musa acuminata	Transport	Unclear	Molecular evidence:RNA sequencing	1.03871	0.733937	1.50312	3.09907
Traes_5DL_F657BF165	GSMUA_Achr8T25880_001	0	Musa acuminata	Transport	Unclear	Molecular evidence:RNA sequencing	-0.449813	1.02668	-0.189669	-0.619593
Traes_4DS_DD1C9A30F	GSMUA_Achr9T04560_001	1e-85	Musa acuminata	Transport	Unclear	Molecular evidence:RNA sequencing	0.167942	-0.348195	-1.08952	-1.22745
Traes_5DL_95DBDBAD1	GSMUA_Achr9T04560_001	2e-88	Musa acuminata	Transport	Unclear	Molecular evidence:RNA sequencing	0.0264255	0.554273	0.513069	1.31886
Traes_3AL_314D5C929	GSMUA_Achr9T16830_001	E-172	Musa acuminata	Transport	Unclear	Molecular evidence:RNA sequencing	-0.120331	0.0634648	0.899379	1.11966
Traes_3DL_7A1FCF1DE	GSMUA_Achr9T16830_001	E-169	Musa acuminata	Transport	Unclear	Molecular evidence:RNA sequencing	-0.120735	-0.223483	0.787259	1.05951
Traes_7DS_EDD619B0C	GSMUA_Achr9T22670_001	0	Musa acuminata	Transport	Unclear	Molecular evidence:RNA sequencing	0.520929	1.86571	3.01764	0.454325
Traes_7AL_52779A5E2	GSMUA_Achr9T23160_001	4e-60	Musa acuminata	Transport	Unclear	Molecular evidence:RNA sequencing	0.30796	1.24595	3.24237	2.89352
Traes_7DL_775CC778D	GSMUA_Achr9T23160_001	E-117	Musa acuminata	Transport	Unclear	Molecular evidence:RNA sequencing	0.0467368	0.118898	1.64277	1.87547
Traes_5BL_7CE3EDE29	GSMUA_Achr9T27290_001	E-102	Musa acuminata	Transport	Unclear	Molecular evidence:RNA sequencing	-0.918371	1.36997	-0.382545	-0.430285
Traes_5DL_DA6449AC6	GSMUA_Achr9T27290_001	E-102	Musa acuminata	Transport	Unclear	Molecular evidence:RNA sequencing	-1.17979	1.52477	-0.355826	-0.311731
Traes_3AL_E95E3E278	GSMUA_AchrUn_randomT21370_001	E-164	Musa acuminata	Transport	Unclear	Molecular evidence:RNA sequencing	0.298563	0.524889	0.840333	2.51013
Traes_3B_1A2826B28	GSMUA_AchrUn_randomT21370_001	0	Musa acuminata	Transport	Unclear	Molecular evidence:RNA sequencing	0.0535225	0.473743	0.981149	2.33868
