# Supplementary material for: Transcriptome Analysis of Early Senescence in the Post-Anthesis Flag Leaf of Wheat (Triticum aestivum L.)
Source: Plants (Basel). 2022 Oct 1;11(19):2593. doi: 10.3390/plants11192593 (PMC9572001; doi:10.3390/plants11192593)
Supplement: Supplementary file 1 [file plants-11-02593-s001.zip › Table S4. Transporter-related SAGs.xls]

## Sheet: Sheet1
Gene_id	Log2(Ratio)				Annotation	Homologue	E value	Species	Substrate
	0DAA	15DAA	25DAA	30DAA
Traes_4BS_C0973D1DA	0.393539	1.21152	1.26343	2.64514	Amino acid permease 3-like	XP_006662801.1	0	Oryza brachyantha	Amino acid
Traes_3AL_E95E3E278	0.298563	0.524889	0.840333	2.51013	Amino acid permease BAT1	XP_006644350.1	0	Oryza brachyantha	Amino acid
Traes_3B_1A2826B28	0.0535225	0.473743	0.981149	2.33868	Amino acid permease BAT1	XP_006644350.1	0	Oryza brachyantha	Amino acid
Traes_5AS_D408E8790	-0.15626	-0.00241115	0.699943	2.22855	Cationic amino acid transporter 2	XP_006664762.1	0	Oryza brachyantha	Amino acid
Traes_5BS_9384D46B3	-0.106073	-0.0466872	1.12955	1.93376	Cationic amino acid transporter 2	XP_006664762.1	0	Oryza brachyantha	Amino acid
Traes_5DS_E7A07F032	-0.140849	-0.0633205	1.02801	2.52594	Cationic amino acid transporter 2	XP_006664762.1	0	Oryza brachyantha	Amino acid
Traes_7BL_6EF469A1F	0.883874	-0.581151	-0.276095	0.321833	Lysine histidine transporter 1-like	XP_003573326.1	1e-158	Brachypodium distachyon	Amino acid
Traes_7DL_30B685267	0.657853	-0.731158	-0.865769	-0.303484	Lysine histidine transporter 1-like	XP_003573326.1	0	Brachypodium distachyon	Amino acid
Traes_7AL_9F8C57492	1.36099	-0.76703	0.395646	1.18915	Lysine histidine transporter 2-like	XP_003573327.1	0	Brachypodium distachyon	Amino acid
Traes_7BL_28C34BF1C	1.43541	-0.282848	-0.0276857	0.88565	Lysine histidine transporter 2-like	XP_003573327.1	0	Brachypodium distachyon	Amino acid
Traes_2BL_8FFBE8AF6	0.0231614	0.588804	1.1432	1.63224	Proline transporter 1-like	XP_006658185.1	0	Oryza brachyantha	Amino acid
Traes_4BS_83DF7B31C	-0.0472048	-0.457217	-1.19269	0.614108	Proline transporter 1-like	XP_006658185.1	0	Oryza brachyantha	Amino acid
Traes_7DL_DB979A72F	0.231207	0.208487	-0.153999	2.22754	Sodium-coupled neutral amino acid transporter 4-like	XP_006656275.1	0	Oryza brachyantha	Amino acid
Traes_3B_0B36CB0D3	0.0563414	-0.126441	-0.492062	2.47668	Sodium-coupled neutral amino acid transporter 7-like	XP_006644933.1	0	Oryza brachyantha	Amino acid
Traes_2BL_F72ED64FB	-1.26969	-0.731796	2.36558	5.28881	Vacuolar amino acid transporter 1-like	XP_006665080.1	0	Oryza brachyantha	Amino acid
Traes_1AL_1A7B215EC	0.108354	-0.0978023	2.28271	1.91021	Carbohydrate transporter	NP_001149291.1	3e-174	Zea mays	Carbohydrate
Traes_1DL_547D8DAC2	-0.103356	1.18015	2.23379	3.24573	D-xylose-proton symporter-like 2	XP_006662109.1	0	Oryza brachyantha	Carbohydrate
Traes_4DL_CBD89C78D	0.445349	-0.322329	1.98912	2.48305	GDP-mannose transporter GONST3-like isoform X1	XP_003558498.1	0	Brachypodium distachyon	Carbohydrate
Traes_4AS_C4001163C	0.840251	-0.453685	2.64578	2.32908	GDP-mannose transporter GONST3-like isoform X2	XP_006649634.1	0	Oryza brachyantha	Carbohydrate
Traes_2AS_7B612C346	1.03558	0.176008	3.85479	3.2393	Glucose-6-phosphate/phosphate translocator 2	EMT13790.1	0	Aegilops tauschii	Carbohydrate
Traes_2BS_94C42CB70	0.94714	0.594202	2.1559	2.96551	Glucose-6-phosphate/phosphate translocator 2	EMT13790.1	0	Aegilops tauschii	Carbohydrate
Traes_2DS_FCCFA0BE1	0.500642	-1.09641	2.67401	2.2506	Glucose-6-phosphate/phosphate translocator 2	EMT13790.1	0	Aegilops tauschii	Carbohydrate
Traes_2AL_56247C7D9	-0.0398987	-0.239367	4.20701	2.19908	Glycerol-3-phosphate transporter 1	XP_010240222.1	0	Brachypodium distachyon	Carbohydrate
Traes_2DL_652675A4A	0.367709	0.08863	4.98764	2.56002	Glycerol-3-phosphate transporter 1	EMS47988.1	2e-44	Triticum urartu	Carbohydrate
Traes_7AL_D8FF3FF19	0.292429	0.942971	2.59365	2.44707	Glycerol-3-phosphate transporter 1	XP_006659130.1	0	Oryza brachyantha	Carbohydrate
Traes_7DL_F4972CA5C	-0.0399436	-0.128375	1.81287	1.01392	Glycerol-3-phosphate transporter 1	XP_006659130.1	0	Oryza brachyantha	Carbohydrate
Traes_1DL_9B23DBE46	0.355872	1.53041	1.3565	0.750289	Monosaccharide-sensing protein 2-like	XP_006662557.1	0	Oryza brachyantha	Carbohydrate
Traes_6BS_C08C1D737	0.0296257	1.97849	2.38963	0.433212	Monosaccharide-sensing protein 2-like isoform X1	XP_006647093.1	0	Oryza brachyantha	Carbohydrate
Traes_6DS_293B9631C	0.359527	2.13856	3.03743	0.633487	Monosaccharide-sensing protein 2-like isoform X1	XP_006647093.1	0	Oryza brachyantha	Carbohydrate
Traes_3B_7A8BEDB00	-0.308961	-1.34174	-0.107145	0.240332	Plastidic glucose transporter 4-like	XP_006643688.1	0	Oryza brachyantha	Carbohydrate
Traes_4BL_B6037FD0C	-0.134335	0.94813	-0.00298519	-1.07055	Polyol transporter 1	XP_003558585.1	3e-57	Brachypodium distachyon	Carbohydrate
Traes_5BS_5B7315F37	0.107117	0.811432	2.52088	3.03093	Polyol transporter 1	EMS61468.1	0	Triticum urartu	Carbohydrate
Traes_5DS_3032E79B5	0.138447	0.0306229	0.55622	1.72634	Polyol transporter 1	EMS61468.1	0	Triticum urartu	Carbohydrate
Traes_2AS_3F30521B9	0.960677	-0.317111	2.14152	4.04367	Polyol transporter 5	XP_006657888.1	0	Oryza brachyantha	Carbohydrate
Traes_2AS_BDB982457	0.536195	-1.02955	0.651733	1.47222	Polyol transporter 5	XP_006657888.1	0	Oryza brachyantha	Carbohydrate
Traes_2DS_4426C3F2F	0.636843	-1.2295	1.13761	1.51127	Polyol transporter 5	XP_006657888.1	3e-36	Oryza brachyantha	Carbohydrate
Traes_4BS_6E9FDF39C	-0.0241932	0.720562	0.809747	-1.24733	Polyol transporter 5	EMS48678.1	0	Triticum urartu	Carbohydrate
Traes_4DS_E4F39963B	0.289096	-0.0134758	-0.579796	-1.98011	Polyol transporter 5	EMS48678.1	0	Triticum urartu	Carbohydrate
Traes_2BS_C8FB3060D	0.538311	-0.997721	0.717957	1.73166	Polyol transporter 5-like	XP_006657888.1	0	Oryza brachyantha	Carbohydrate
Traes_2BS_D5A97B888	0.660148	-0.791531	1.76063	3.61062	Polyol transporter 5-like	XP_006657888.1	0	Oryza brachyantha	Carbohydrate
Traes_4AS_52A387868	0.0988387	1.26594	1.16353	-0.0134022	Polyol transporter 5-like	XP_006649563.1	0	Oryza brachyantha	Carbohydrate
Traes_2AL_7CEF57402	0.97001	-0.395529	-1.29224	-0.790058	Sugar carrier protein C-like	XP_003557694.1	0	Brachypodium distachyon	Carbohydrate
Traes_2BL_D7C4154FA	0.8538	-0.819302	-1.29764	-0.54418	Sugar carrier protein C-like	XP_003557694.1	0	Brachypodium distachyon	Carbohydrate
Traes_2BL_007AADDF1	0.0913893	-0.217377	4.8613	2.34605	Sugar phosphate exchanger 2	EMT17209.1	0	Aegilops tauschii	Carbohydrate
Traes_4AS_6E6C9CC37	0.729906	0.190966	0.811453	1.58971	Sugar phosphate/phosphate translocator At3g11320-like	XP_006651269.1	0	Oryza brachyantha	Carbohydrate
Traes_4BL_80341C1C2	0.66951	0.129734	1.11131	2.082	Sugar phosphate/phosphate translocator At3g11320-like	XP_006651269.1	0	Oryza brachyantha	Carbohydrate
Traes_4DL_C9CBE5A1D	0.421373	0.325655	1.21469	1.77297	Sugar phosphate/phosphate translocator At3g11320-like	XP_006651269.1	0	Oryza brachyantha	Carbohydrate
Traes_3B_A4B3E963C	0.252678	0.744037	1.53484	1.27912	Sugar phosphate/phosphate translocator At4g32390-like	XP_006644858.1	0	Oryza brachyantha	Carbohydrate
Traes_2DL_58A8C528E	0.915409	-0.816118	-1.6515	-0.761241	Sugar transport protein 1	EMT07435.1	1e-83	Aegilops tauschii	Carbohydrate
Traes_2DL_9A67DCEEE	0.935702	-0.806097	-1.77523	-0.609137	Sugar transport protein 1	EMT07435.1	4e-88	Aegilops tauschii	Carbohydrate
Traes_4AS_7258345F9	0.680453	-0.225699	-1.63557	-1.0711	Sugar transport protein 13-like	XP_006649643.1	0	Oryza brachyantha	Carbohydrate
Traes_4BL_2CD045152	1.06373	-1.40997	-0.605534	0.352126	Sugar transport protein 13-like	XP_006649643.1	0	Oryza brachyantha	Carbohydrate
Traes_4DL_CFC191A06	0.707327	-1.24128	-1.4133	-0.445437	Sugar transport protein 13-like	XP_006649643.1	0	Oryza brachyantha	Carbohydrate
Traes_5DL_D85DBC184	0.134292	-0.774255	-0.0417662	0.365827	Sugar transport protein 14	XP_006660534.1	0	Oryza brachyantha	Carbohydrate
Traes_2BL_E7EF8089C	0.178917	1.79591	3.80736	7.93897	Sugar transport protein 5	EMT21057.1	0	Aegilops tauschii	Carbohydrate
Traes_2BL_2FD1E9ADA	-0.353629	0.7046	1.40042	2.03867	Sugar transport protein 5-like	XP_006652353.1	0	Oryza brachyantha	Carbohydrate
Traes_1BL_99C748D51	0.527988	1.23139	2.31133	2.48438	Sugar transporter ERD6-like 4	XP_006654835.1	0	Oryza brachyantha	Carbohydrate
Traes_1DL_7FD4EA081	0.37341	0.823181	1.81086	1.9948	Sugar transporter ERD6-like 4	XP_006654835.1	0	Oryza brachyantha	Carbohydrate
Traes_4BL_8F2D39ABB	-0.290933	-0.277308	0.710449	2.53641	Sugar transporter ERD6-like 6	XP_006655599.1	0	Oryza brachyantha	Carbohydrate
Traes_1AL_FA799A213	0.30867	0.922014	1.80064	1.82717	Sugar transporter ERD6-lile 4	XP_006654835.1	3e-138	Oryza brachyantha	Carbohydrate
Traes_2AL_66220D19D	-0.160708	1.67319	1.54943	1.82016	Aquaporin	BAF33069.1	0	Hordeum vulgare	H2O
Traes_2AL_DD284DEA9	-0.232041	1.44701	0.768279	1.47693	Aquaporin	BAF33069.1	0	Hordeum vulgare	H2O
Traes_2BL_C1D1054B1	-0.0330083	1.564	0.606487	1.29483	Aquaporin	BAF33069.1	0	Hordeum vulgare	H2O
Traes_2BL_D274D68D2	0.253001	1.64457	1.67092	1.85145	Aquaporin	BAF33069.1	0	Hordeum vulgare	H2O
Traes_2DL_039832D76	0.0817216	1.87029	1.63512	1.66203	Aquaporin	BAF33069.1	2e-93	Hordeum vulgare	H2O
Traes_2DL_08ED30064	-0.0870325	1.51549	0.963074	1.55619	Aquaporin	BAF33069.1	7e-90	Hordeum vulgare	H2O
Traes_2DL_B5F355960	0.199083	1.79733	1.6428	1.5582	Aquaporin	BAF33069.1	5e-71	Hordeum vulgare	H2O
Traes_6AL_23B31796F	-0.259954	0.973839	1.88072	2.55071	Aquaporin 7	AEO13898.1	0	Triticum aestivum	H2O
Traes_6AL_A27064D17	-0.0954912	1.58332	1.02297	1.05143	Aquaporin PIP1	AAM00368.1	2e-146	Triticum aestivum	H2O
Traes_6DL_368664EA1	0.018256	1.34062	0.732206	0.723221	Aquaporin PIP1	AAM00368.1	6e-136	Triticum aestivum	H2O
Traes_6AL_00EDAC7DB	-0.142458	1.93157	1.97609	1.78354	Aquaporin PIP1-5	EMS50328.1	1e-174	Triticum urartu	H2O
Traes_6AL_A9FBD28C1	-0.101061	1.74072	0.700042	1.01963	Aquaporin PIP1-5	EMT27606.1	4e-74	Aegilops tauschii	H2O
Traes_6AL_D50E09BFC	-0.236558	1.86123	1.79382	1.59133	Aquaporin PIP1-5	EMS50328.1	5e-137	Triticum urartu	H2O
Traes_6DL_B63C122DF	-0.0939545	1.45004	0.732457	0.752028	Aquaporin PIP1-5	EMS50327.1	2e-40	Triticum urartu	H2O
Traes_6AS_D9FD6E723	1.60566	3.1759	3.38888	5.20373	Aquaporin PIP2-3	EMT26209.1	2e-152	Aegilops tauschii	H2O
Traes_3B_EE9156FFA	-0.532382	0.871743	0.867961	0.926344	Aquaporin TIP1-2	EMT32480.1	2e-150	Aegilops tauschii	H2O
Traes_3B_7E0F61BC3	0.152693	1.1762	-1.98705	-2.75584	Boron transporter 4-like	XP_006643819.1	0	Oryza brachyantha	Metal
Traes_5AL_C89EEBE50	-0.180204	-0.597344	1.00964	0.800335	Cadmium/zinc-transporting ATPase HMA1, chloroplastic-like	XP_006656409.1	0	Oryza brachyantha	Metal
Traes_7AL_8304348B7	-0.212012	0.703989	1.21927	2.84449	Cadmium/zinc-transporting ATPase HMA2-like	XP_006656442.1	0	Oryza brachyantha	Metal
Traes_7DL_A5269C73F	-0.0778708	-0.0721839	0.67767	1.76581	Cadmium/zinc-transporting ATPase HMA2-like	XP_006656442.1	0	Oryza brachyantha	Metal
Traes_3DL_5DE96C1D2	-0.111371	0.655618	1.06893	0.586751	Calmodulin-3	EMT01650.1	2e-80	Aegilops tauschii	Metal
Traes_7BL_956842621	0.141371	-0.0249574	0.483653	1.25284	Copper transport protein ATX1	XP_006659209.1	7e-36	Oryza brachyantha	Metal
Traes_7DL_4B6FAFD6B	0.0726102	0.185409	1.11641	1.88621	Copper transport protein ATX1	NP_564870.1	3e-37	Arabidopsis thaliana	Metal
Traes_3AL_4979C1182	-0.577937	-1.26161	0.213663	1.78504	Copper transport protein CCH	XP_003564511.1	9e-38	Brachypodium distachyon	Metal
Traes_2AL_2A274FDB8	-0.622712	-0.80398	-2.42671	-3.39645	Ferric reduction oxidase 7, chloroplastic-like	XP_006653450.1	0	Oryza brachyantha	Metal
Traes_2BL_C7CDCB39A	-0.714743	-0.435921	-2.70003	-4.33683	Ferric reduction oxidase 7, chloroplastic-like	XP_006653450.1	0	Oryza brachyantha	Metal
Traes_5DL_95DBDBAD1	0.0264255	0.554273	0.513069	1.31886	Ferritin 1A	ACJ05643.1	7e-135	Triticum aestivum	Metal
Traes_4DS_DD1C9A30F	0.167942	-0.348195	-1.08952	-1.22745	Ferritin 2A	ACJ05654.1	2e-167	Triticum aestivum	Metal
Traes_2AL_A2CBDB5F7	0.0975068	0.0479197	1.44292	0.143413	K+ efflux antiporter 2, chloroplastic-like	XP_006653044.1	0	Oryza brachyantha	Metal
Traes_2BL_BA71DD685	0.158979	-0.0435976	1.0401	-0.354456	K+ efflux antiporter 2, chloroplastic-like	XP_006653044.1	0	Oryza brachyantha	Metal
Traes_2DL_053E73CFE	0.188453	-0.115472	1.11044	-0.185678	K+ efflux antiporter 2, chloroplastic-like	XP_006653044.1	0	Oryza brachyantha	Metal
Traes_5AS_AF90452F5	-0.11396	0.255389	-0.672123	-1.39399	K+ efflux antiporter 3, chloroplastic-like	XP_006664751.1	0	Oryza brachyantha	Metal
Traes_5BS_6759CB1AD	-0.102745	0.255816	-0.549119	-1.74146	K+ efflux antiporter 3, chloroplastic-like	XP_006664751.1	0	Oryza brachyantha	Metal
Traes_5DS_49CF8A4C4	-0.110492	0.143291	-0.551292	-1.19144	K+ efflux antiporter 3, chloroplastic-like	XP_006664751.1	0	Oryza brachyantha	Metal
Traes_4AL_37B6D6FC3	0.339602	0.229617	-0.488202	-1.81685	Magnesium transporter MRS2-A, chloroplastic-like	XP_006651696.1	3e-158	Oryza brachyantha	Metal
Traes_4BS_165612CC9	0.166856	0.447915	-0.433488	-1.40119	Magnesium transporter MRS2-A, chloroplastic-like	XP_006651696.1	1e-171	Oryza brachyantha	Metal
Traes_3B_DDE54BDCF	-0.279917	-0.707535	-1.40722	-2.45986	Magnesium transporter NIPA2-like	ref|XP_006645129.1	0	Oryza brachyantha	Metal
Traes_1BS_7F56C8B50	0.100766	-0.0172173	1.19299	1.73645	Metal tolerance protein 1-like	XP_006654001.1	6e-102	Oryza brachyantha	Metal
Traes_4AS_BBF51CA2E	0.340747	1.42865	2.40868	3.6502	Metal transporter Nramp2	XP_006649602.1	0	Oryza brachyantha	Metal
Traes_4BL_C6A3F5C8A	0.628152	1.09404	4.36906	4.83009	Metal transporter Nramp2	XP_006649602.1	0	Oryza brachyantha	Metal
Traes_4DL_CA00023AB	0.507867	0.0202405	1.58482	1.95988	Metal transporter Nramp2	XP_006649602.1	0	Oryza brachyantha	Metal
Traes_2DL_784FC5773	-0.174454	-1.62244	-2.64093	0.636927	Metal-nicotianamine transporter YSL12	Q5JQD7.2|YSL12_ORYSJ	0	Oryza sativa Indica Group	Metal
Traes_6AL_7FB45D4DE	0.0349242	1.39265	2.37884	2.14167	Metal-nicotianamine transporter YSL14	XP_006648859.1	0	Oryza brachyantha	Metal
Traes_6DL_2918A17AC	0.365283	0.991796	2.81055	1.43543	Metal-nicotianamine transporter YSL14	XP_006648859.1	0	Oryza brachyantha	Metal
Novel01831	-0.214756	0.65605	1.37512	2.23309	Metal-nicotianamine transporter YSL6	gb|EMT26359.1	0	Oryza brachyantha	Metal
Traes_2AL_349D3BE80	0.16309	0.762318	1.44586	2.38638	Metal-nicotianamine transporter YSL6	XP_006653335.1	4e-105	Oryza brachyantha	Metal
Traes_2BL_0CBCC13AD	-0.0395818	1.02273	2.07471	2.76362	Metal-nicotianamine transporter YSL6	XP_006653335.1	0	Oryza brachyantha	Metal
Traes_2BL_E4D41A32B	-0.146329	0.568119	1.49766	2.22384	Metal-nicotianamine transporter YSL6	XP_006653335.1	7e-104	Oryza brachyantha	Metal
Traes_2DL_8732A1C56	-0.0171711	0.628159	1.02874	2.3951	Metal-nicotianamine transporter YSL6	XP_006653335.1	0	Oryza brachyantha	Metal
Traes_2AL_CFCA01C76	0.0573481	1.37891	2.39233	2.55441	Metal-nicotianamine transporter YSL9	XP_006653627.1	0	Oryza brachyantha	Metal
Traes_2DL_131222AE2	-0.226296	0.766943	2.54007	3.28671	Metal-nicotianamine transporter YSL9	XP_006653627.1	0	Oryza brachyantha	Metal
Traes_2DL_8C4BFA3CB	-0.0290402	0.463376	0.74641	1.32673	Metal-nicotianamine transporter YSL9	Q7XUJ2.2|YSL9_ORYSJ	0	Oryza sativa Japonica Group	Metal
Traes_2DL_634254F09	1.27072	-1.65562	1.29683	1.91549	Potassium transporter 1	EMT26528.1	3e-132	Aegilops tauschii	Metal
Traes_2AL_987F244D2	0.744599	-1.50673	1.56027	1.4935	Potassium transporter 1-like	XP_006652236.1	0	Oryza brachyantha	Metal
Traes_2BL_D0C7517E1	0.764611	-1.87316	-0.0230708	1.31946	Potassium transporter 1-like	XP_006652236.1	0	Oryza brachyantha	Metal
Traes_2DL_74E015594	0.907568	-1.81791	1.22178	1.787	Potassium transporter 1-like	XP_006652236.1	0	Oryza brachyantha	Metal
Traes_3DL_598708C12	0.0663903	-0.251463	0.236869	0.863637	Potassium transporter 5	XP_006645280.1	0	Oryza brachyantha	Metal
Traes_2AS_DE0D48CF6	0.173751	0.385729	1.05376	1.55583	Potassium transporter 7-like	XP_006658092.1	0	Oryza brachyantha	Metal
Traes_2BS_ECB89174C	0.239946	0.255521	1.143	1.65656	Potassium transporter 7-like	XP_006658092.1	0	Oryza brachyantha	Metal
Traes_2DS_42980B984	0.266663	-0.192689	0.767621	2.29583	Potassium transporter 7-like	XP_006658092.1	0	Oryza brachyantha	Metal
Traes_2AS_01BF89DD2	-0.303584	1.11759	0.612717	0.289566	Potassium transporter 9-like isoform X1	XP_006658130.1	0	Oryza brachyantha	Metal
Traes_5AL_C1581C6C5	-0.0945646	0.348552	0.431609	1.5487	Potassium transporter 18-like	XP_006660981.1	0	Oryza brachyantha	Metal
Traes_5BL_F112FA40E	-0.210971	0.0328153	0.424267	1.23832	Potassium transporter 18-like	XP_006660981.1	0	Oryza brachyantha	Metal
Traes_5AL_B64648FE6	0.169163	0.327806	2.37857	1.78698	Potassium transporter 23-like	XP_006661180.1	0	Oryza brachyantha	Metal
Traes_5BL_ECFF2CD6E	0.166463	0.780138	2.16653	1.71429	Potassium transporter 23-like	XP_006661180.1	1e-106	Oryza brachyantha	Metal
Traes_5BL_F43BDBCB9	0.0776454	0.759692	2.1347	1.6217	Potassium transporter 23-like	XP_006661180.1	0	Oryza brachyantha	Metal
Traes_5DL_B68F9C403	0.0178383	0.523501	2.30273	2.09349	Potassium transporter 23-like	XP_006661180.1	0	Oryza brachyantha	Metal
Traes_7DS_EDD619B0C	0.520929	1.86571	3.01764	0.454325	Potassium transporter 24-like	XP_006656870.1	0	Oryza brachyantha	Metal
Traes_3AL_9F1E0BAE1	-0.0204635	0.729309	0.696734	1.13606	Sodium/metabolite cotransporter BASS2, chloroplastic-like	XP_006644431.1	0	Oryza brachyantha	Metal
Traes_3DL_34EADFCED	0.165009	0.749237	1.71597	2.04828	Sodium/metabolite cotransporter BASS2, chloroplastic-like	XP_006644431.1	0	Oryza brachyantha	Metal
Traes_5DL_DA6449AC6	-1.17979	1.52477	-0.355826	-0.311731	Vacuolar iron transporter 1	XP_006660605.1	9e-126	Oryza brachyantha	Metal
Traes_5BL_7CE3EDE29	-0.918371	1.36997	-0.382545	-0.430285	Vacuolar iron transporter 1	XP_006660605.1	5e-125	Oryza brachyantha	Metal
Traes_4BS_1DCF82CB7	1.03871	0.733937	1.50312	3.09907	ZIFL 1-like isoform X1	XP_004977467.1	0	Setaria italica	Metal
Traes_2AL_BE05B34FF	0.822219	1.29819	2.63542	3.22973	Zn transporter 1	EMT08251.1	4e-178	Aegilops tauschii	Metal
Traes_2AS_4CA7607E5	0.436232	2.03574	2.81454	2.96568	Zn transporter 1	EMT08251.1	6e-143	Aegilops tauschii	Metal
Traes_2BL_A1BCBD2BE	0.169366	0.538925	1.54113	2.06363	Zn transporter 1	EMT08251.1	0	Aegilops tauschii	Metal
Traes_2DL_D0582A4B1	0.201347	-0.558675	-0.400297	-0.671601	Zn transporter 1	EMT08251.1	3e-144	Aegilops tauschii	Metal
Traes_7AL_F1D611563	0.745725	1.10042	2.10202	2.57492	Zn transporter 10	gb|EMS59281.1	2e-93	Triticum urartu	Metal
Traes_6DS_E7826C696	-0.251912	-0.804768	-1.05921	-1.45363	Zn transporter 11	gb|EMT09169.1	2e-144	Aegilops tauschii	Metal
Traes_7AS_2D3700F9E	-0.262954	0.944439	2.1259	2.30685	Aluminum-activated malate transporter 9-like	XP_006656868.1	0	Oryza brachyantha	Organic acid
Traes_7DS_B67F78085	-0.287526	1.18724	2.53408	2.52091	Aluminum-activated malate transporter 9-like	XP_006656868.1	0	Oryza brachyantha	Organic acid
Traes_3AL_314D5C929	-0.120331	0.0634648	0.899379	1.11966	Auxin efflux carrier family protein-like	BAD73344.1	0	Oryza sativa Japonica Group	Plant hormone
Traes_3DL_7A1FCF1DE	-0.120735	-0.223483	0.787259	1.05951	Auxin efflux carrier family protein-like	BAD73344.1	0	Oryza sativa Japonica Group	Plant hormone
Traes_3B_C0FA00AC4	-0.316714	-0.803623	-2.33677	-2.49454	Auxin transporter-like protein 1-like	XP_006645042.1	0	Oryza brachyantha	Plant hormone
Traes_5DS_28949833C	0.396807	0.652863	-0.136318	-0.937298	Dicarboxylate transporter 1	XP_003575954.1	0	Brachypodium distachyon	Organic acid
Traes_6BL_205A0D282	0.17106	0.0893889	0.766373	1.97092	Equilibrative nucleoside transporter 4	EMS65737.1	4e-138	Triticum urartu	nucleoside
Traes_6AL_01DB61EF6	-0.109522	-0.149862	1.09547	2.31623	Equilibrative nucleotide transporter 1-like	XP_006659926.1	0	Oryza brachyantha	nucleoside
Traes_6DL_3AAE464EA	-0.142334	-0.307805	0.326736	1.43157	Equilibrative nucleotide transporter 1-like	XP_006659926.1	0	Oryza brachyantha	nucleoside
Traes_2AS_9DE16F020	0.509099	-0.0740355	-0.259515	2.03172	Equilibrative nucleotide transporter 3-like	XP_006657824.1	0	Oryza brachyantha	nucleoside
Traes_4BL_04956D80D	-0.286623	0.0918025	-2.08322	-1.83471	Low affinity sulfate transporter 3-like	XP_006651130.1	0	Oryza brachyantha	Sulfate
Traes_4DL_58C874E07	0.0446202	-0.141968	-1.91594	-1.34678	Low affinity sulfate transporter 3-like	XP_006651130.1	0	Oryza brachyantha	Sulfate
Traes_5BL_97BEC5636	0.396832	-0.402633	1.10706	1.18523	MATE efflux family protein 5	EMS66209.1	0	Triticum urartu	Organic acid
Traes_7DS_380AC22D6	0.310358	1.46554	2.41203	2.81509	MATE efflux family protein 8	EMS55424.1	9e-92	Triticum urartu	Organic acid
Traes_3AS_D054FE93E	-0.23994	-0.478941	-0.80228	-2.19293	Mitochondrial dicarboxylate/tricarboxylate transporter DTC-like	XP_006663396.1	1e-148	Oryza brachyantha	Organic acid
Traes_3B_8E66C933E	-0.129322	-0.683863	-0.89957	-2.40458	Mitochondrial dicarboxylate/tricarboxylate transporter DTC-like	XP_006663396.1	9e-142	Oryza brachyantha	Organic acid
Traes_3DS_D1031AFC6	-0.283123	-0.784727	-0.871239	-2.87434	Mitochondrial dicarboxylate/tricarboxylate transporter DTC-like	XP_006663396.1	2e-130	Oryza brachyantha	Organic acid
Traes_4AL_170182078	0.453006	-0.393913	1.43897	4.1953	Oligopeptide transporter 7-like	XP_006655730.1	0	Oryza brachyantha	Oligopeptide
Traes_7AS_9A20F47CE	0.663504	0.710932	2.59535	5.71304	Oligopeptide transporter 7-like	XP_006655730.1	0	Oryza brachyantha	Oligopeptide
Traes_7DS_748C4CFCA	-0.155577	0.45344	1.15396	3.57399	Oligopeptide transporter 7-like	XP_006655730.1	0	Oryza brachyantha	Oligopeptide
Traes_5BS_352BDF9B4	0.980665	0.342179	0.99032	1.67937	Peptide transporter PTR1	EMT08635.1	0	Aegilops tauschii	Peptide
Traes_5DS_D92348F2E	1.25383	0.382186	0.877435	3.21381	Peptide transporter PTR1	EMT08635.1	0	Aegilops tauschii	Peptide
Traes_3B_32535F578	-0.291418	0.481703	1.04789	1.19448	Peptide transporter PTR1-like	XP_006645185.1	0	Oryza brachyantha	Peptide
Traes_3B_C8389D284	0.46948	-0.0241713	1.06817	2.01355	Peptide transporter PTR1-like	XP_006643742.1	0	Oryza brachyantha	Peptide
Traes_4AL_59D5504B1	0.0329665	0.35099	1.33231	2.29951	Peptide transporter PTR2-like	XP_006650508.1	0	Oryza brachyantha	Peptide
Traes_4BS_15871AAF4	0.105493	0.444063	1.92266	3.04672	Peptide transporter PTR2-like	XP_006650508.1	0	Oryza brachyantha	Peptide
Traes_1AL_670C92349	0.260381	0.265904	1.58929	1.36988	Peptide transporter PTR2-like	XP_006661721.1	0	Oryza brachyantha	Peptide
Traes_4DS_42A657188	-0.0722988	0.202837	0.980467	1.9657	Peptide transporter PTR2-like	XP_006650508.1	0	Oryza brachyantha	Peptide
Traes_4DL_A6C2EE5BC	0.510631	0.621078	3.40585	3.91344	Peptide transporter PTR3-A-like	XP_006649373.1	0	Oryza brachyantha	Peptide
Traes_3AS_AB88DA388	0.981287	1.39574	2.06242	3.34018	Peptide transporter PTR5	EMT28633.1	5e-50	Aegilops tauschii	Peptide
Traes_3DL_B2B496552	0.179514	0.171284	1.03901	3.64563	Putative sulfate transporter 3.5	EMT02170.1	0	Aegilops tauschii	Sulfate
Traes_4AS_CE4C6A8A2	0.965033	0.141572	0.239935	2.84279	Sulfate transporter 1.2-like	XP_006649558.1	0	Oryza brachyantha	Sulfate
Traes_5AL_1A881D2ED	0.509561	-0.519345	-0.544285	-0.892335	Sulfate transporter 1.2-like	XP_006659385.1	0	Oryza brachyantha	Sulfate
Traes_3AL_224FB10D3	-0.208144	0.59491	3.08582	6.37968	Sulfate transporter 3.5	EMT02170.1	0	Aegilops tauschii	Sulfate
Traes_5AL_1F90AF47B	0.270668	0.583548	0.0868668	1.75548	Sulfate transporter 4.1	XP_006660438.1	0	Oryza brachyantha	Sulfate
Traes_3B_D6E12C0A1	0.356645	2.16632	4.85982	5.5112	Tonoplast dicarboxylate transporter-like	XP_006660760.1	0	Oryza brachyantha	Organic acid
Traes_5DL_A86D8E03D	0.343465	-0.0578759	1.56665	4.12162	Tonoplast dicarboxylate transporter-like	XP_006660760.1	0	Oryza brachyantha	Organic acid
Traes_3B_FF743C11E	-0.163564	-0.214951	-0.998157	-1.30846	Triose phosphate translocator	AAK27373.1	0	Oryza sativa	Organic acid
Traes_3DS_30A3BE435	-0.142781	0.0589026	-0.843335	-1.23624	Triose phosphate translocator	AAK27373.1	2e-143	Oryza sativa	Organic acid
Traes_2DL_64803388A	0.158336	1.11182	1.42484	2.28802	Calreticulin-like protein	AAW02798.1	0	Triticum aestivum	Undefined
Traes_5DL_F4D2FB18B	0.376589	1.24773	2.1151	2.43805	Organic cation/carnitine transporter 7-like	XP_003562078.1	0	Brachypodium distachyon	Undefined
Traes_2AL_CB95E606C	0.349474	1.39632	1.64505	1.37246	ABC transporter B family member 19-like	XP_003579371.1	0	Brachypodium distachyon	Undefined
Traes_7DL_A745E3DBB	0.440376	-0.404537	4.35011	-0.728412	ABC transporter B family member 19-like	XP_006659119.1	0	Oryza brachyantha	Undefined
Traes_3AL_C3A46A4FB	2.3148	0.418531	2.35085	2.95223	ABC transporter B family member 4	EMS56139.1	0	Triticum urartu	Undefined
Traes_3DL_B62A5FB0E	1.38661	0.738338	2.76775	4.13406	ABC transporter B family member 4	EMT32504.1	0	Aegilops tauschii	Undefined
Traes_3AL_AA2B2E395	0.13831	0.35212	-0.546407	-0.753321	ABC transporter B family member 4-like	XP_006644534.1	0	Oryza brachyantha	Undefined
Traes_7BS_BB0FECDBE	1.25713	1.13651	2.24588	2.54073	ABC transporter C family member 10	EMT21264.1	0	Aegilops tauschii	Undefined
Traes_7DS_CDF069696	1.62517	1.67576	3.46958	3.76394	ABC transporter C family member 10	EMT21264.1	0	Aegilops tauschii	Undefined
Traes_7DS_EB0ADD31F	1.86505	2.34106	3.89882	4.22427	ABC transporter C family member 10	EMT21264.1	0	Aegilops tauschii	Undefined
Traes_7DS_AEAC5A726	0.867874	-0.272977	1.0224	2.45075	ABC transporter C family member 10	EMT21266.1	0	Aegilops tauschii	Undefined
Traes_7AS_8CC30284A	1.26891	1.16231	2.33071	3.24547	ABC transporter C family member 10	XP_006655816.1	0	Oryza brachyantha	Undefined
Traes_7BS_C88DFDEDC	1.16477	1.62271	3.10695	3.45163	ABC transporter C family member 10-like	XP_006655816.1	0	Oryza brachyantha	Undefined
Traes_3AS_FD018268B	0.567748	-0.424244	-0.794373	-1.22684	ABC transporter C family member 3	EMT08952.1	0	Aegilops tauschii	Undefined
Traes_3B_9A61DFBAA	1.20307	0.158187	0.55775	0.123857	ABC transporter C family member 3	EMT08952.1	0	Aegilops tauschii	Undefined
Traes_3DS_EE5D85DE2	1.00714	-0.042978	-1.19869	-1.85741	ABC transporter C family member 3	EMT08952.1	0	Aegilops tauschii	Undefined
Traes_7AL_DA2363243	0.306593	0.263815	2.47655	2.05346	ABC transporter C family member 8	EMT19704.1	0	Aegilops tauschii	Undefined
Traes_7BL_4CFC83015	1.04222	1.50908	2.87514	3.01475	ABC transporter C family member 8	EMT19704.1	0	Aegilops tauschii	Undefined
Traes_7DL_A95F658D8	1.0281	0.139031	1.44022	1.93738	ABC transporter C family member 8	EMT19704.1	0	Aegilops tauschii	Undefined
Traes_3AS_38993748F	0.597521	1.46991	3.08622	2.04186	ABC transporter C family member 8-like	XP_006655070.1	0	Oryza brachyantha	Undefined
Traes_2DL_256EA81C0	0.471189	0.429932	3.05776	2.36813	ABC transporter C family member 9	EMT27565.1	0	Aegilops tauschii	Undefined
Traes_2BL_1395C82D5	1.06494	2.10029	4.09644	2.92646	ABC transporter C family member 9	EMT27565.1	1e-144	Aegilops tauschii	Undefined
Traes_2AL_2F9F6DB1A	0.52686	1.3439	2.02343	1.87769	ABC transporter C family member 9-like isoform X1	XP_006652711.1	0	Oryza brachyantha	Undefined
Traes_2BL_6FFD5A5E0	0.700607	1.46902	3.63567	2.40801	ABC transporter C family member 9-like isoform X1	XP_006652711.1	0	Oryza brachyantha	Undefined
Traes_2DL_E79ECCBC9	0.552555	0.729212	3.23935	2.64486	ABC transporter C family member 9-like isoform X1	XP_006652711.1	0	Oryza brachyantha	Undefined
Traes_1DS_D8A151F6E	0.0872383	-0.0376328	0.3933	1.26803	ABC transporter D family member 1-like	XP_006645346.1	0	Oryza brachyantha	Undefined
Traes_3AS_B7FEC8871	-0.0673549	0.398547	-0.329023	-0.995285	ABC transporter D family member 2	XP_006643911.1	0	Oryza brachyantha	Undefined
Traes_5DL_33647905D	1.44129	0.925781	2.33571	4.85588	ABC transporter G family member 11-like	XP_006661337.1	0	Oryza brachyantha	Undefined
Traes_1DL_29F70492C	0.448278	-0.232145	0.295529	1.94376	ABC transporter G family member 28-like	XP_006661799.1	0	Oryza brachyantha	Undefined
Traes_2AL_CF862CF2D	-0.274819	0.536799	-1.66086	-0.50942	Ammonium transporter 1-1 (AMT1)	AAL05612.1|AF289477_1	0	Oryza sativa	Undefined
Traes_1AL_A3A29B974	0.53141	-1.27643	-1.86895	-2.10625	Ammonium transporter 2-1(AMT2)	XP_006654528.1	0	Oryza brachyantha	Undefined
Traes_5BL_EA85CB6BC	1.18398	-0.84445	-1.88741	0.185486	Ammonium transporter (AMT3.2)	Q851M9.1|AMT32_ORYSJ	0	Oryza sativa Japonica Group	Undefined
Traes_3B_12A08E20C	0.037085	0.830769	1.29767	0.413509	Anion transporter 1	XP_006645772.1	0	Oryza brachyantha	Undefined
Traes_4AL_3BE1CA5A8	0.134655	0.0643294	-0.624315	-1.28835	Anion transporter 4	XP_006661007.1	0	Oryza brachyantha	Undefined
Traes_4BS_9467B79F9	0.146256	0.465755	-0.218761	-1.17386	Anion transporter 4	XP_006661007.1	0	Oryza brachyantha	Undefined
Traes_4DS_12E3A8F5C	0.164279	0.286856	-0.242365	-0.748522	Anion transporter 4	XP_006661007.1	0	Oryza brachyantha	Undefined
Traes_5DL_C15ECE24E	0.432917	2.35429	4.48418	5.29832	Auxin-induced protein 5NG4	EMT05123.1	0	Aegilops tauschii	Undefined
Traes_2AL_E80950527	0.0948398	-0.185039	0.98613	1.61172	Chloride channel 1	gb|ADW93911.1	0	Hordeum vulgare	Undefined
Traes_2BL_1356B2300	0.389456	-0.267562	0.919644	1.72416	Chloride channel 1	gb|ADW93911.1	0	Hordeum vulgare	Undefined
Traes_2DL_2924C6399	0.164674	-0.085297	1.52827	2.37658	Chloride channel 1	gb|ADW93911.1	0	Hordeum vulgare	Undefined
Traes_3AS_AA4DE445B	-0.394319	0.0590887	-0.117145	1.17881	Chloride channel protein CLC-c-like	XP_006647383.1	0	Oryza brachyantha	Undefined
Traes_7BL_6D5EA3AF9	-0.148679	-0.129355	-1.7205	-1.58546	Disease resistance protein RGA2	EMT00230.1	0	Aegilops tauschii	Undefined
Traes_1DS_937EB36CF	0.471195	-0.715326	-2.57329	-3.47004	Disease resistance protein RPM1	EMT11058.1	0	Aegilops tauschii	Undefined
Traes_2AS_29AE99A14	0.41986	-0.23115	-0.892857	-1.38375	Disease resistance protein RPM1	EMT11058.1	0	Aegilops tauschii	Undefined
Traes_2BL_F79009979	0.113158	1.13849	1.17914	1.99655	Disease resistance protein RPM1	EMT11058.1	0	Aegilops tauschii	Undefined
Traes_3B_76008B163	0.157435	0.466056	0.964775	2.00232	Exportin-7-A-like isoform X1	XP_006644060.1	0	Oryza brachyantha	Undefined
Traes_3AL_D57BE8789	0.542034	-0.22527	2.87802	2.05022	Graves disease carrier protein	EMT05551.1	0	Aegilops tauschii	Undefined
Traes_3DL_9E275293A	0.644048	-0.14805	2.43916	1.97369	Graves disease carrier protein-like	XP_003569657.1	0	Brachypodium distachyon	Undefined
Traes_5DL_391DF2590	0.791967	-0.159063	1.82189	0.639919	Inorganic phosphate transporter 1-8-like	XP_006661801.1	0	Oryza brachyantha	Undefined
Traes_6AL_294A98532	-0.484616	-0.258155	-1.62635	-1.83446	Inorganic phosphate transporter 2-1	XP_006647444.1	0	Oryza brachyantha	Undefined
Traes_2BL_175C78599	0.0130128	0.518283	0.875694	1.82096	Inositol transporter 1-like	EMS61010.1	0	Triticum urartu	Undefined
Traes_3B_21BBB6A08	0.57278	-0.420219	2.69984	1.81203	Mitochondrial substrate carrier family protein B-like	XP_006644595.1	0	Oryza brachyantha	Undefined
Traes_2AL_FB0D6DF8B	0.624464	2.75446	3.49271	3.27451	Molybdate transporter 2-like	XP_006644432.1	0	Oryza brachyantha	Undefined
Traes_2BL_01647D965	0.515589	1.19341	2.58754	1.97699	Molybdate transporter 2-like	XP_006644432.1	0	Oryza brachyantha	Undefined
Traes_5DL_F657BF165	-0.449813	1.02668	-0.189669	-0.619593	Nucleobase-ascorbate transporter 6-like	XP_006660592.1	0	Oryza brachyantha	Undefined
Traes_2DL_F8B3C9448	2.5984	2.16956	6.65379	3.17462	Organic cation transporter protein	EMT08705.1	9e-76	Aegilops tauschii	Undefined
Traes_2DL_0977D942F	0.725323	-0.429418	5.13357	1.90796	Organic cation transporter-like protein	EMS63741.1	8e-78	Triticum urartu	Undefined
Traes_2BL_AA9337DF3	2.01907	0.989693	6.49643	4.19536	Organic cation/carnitine transporter 4	XP_003580618.1	0	Brachypodium distachyon	Undefined
Traes_5AL_BDC9E2142	-0.139341	1.02735	3.04374	3.98422	Organic cation/carnitine transporter 7-like	XP_006650328.1	0	Oryza brachyantha	Undefined
Traes_7AS_735085EFB	0.456851	-1.96822	1.56037	0.480714	Phosphate transporter PHO1-3-like	XP_006656103.1	0	Oryza brachyantha	Undefined
Traes_5BL_FC28B66D8	0.814957	0.0116942	1.80012	0.084474	Phosphate transporter protein	AIZ11187.1	0	Triticum aestivum	Undefined
Traes_5DL_1B21D9A26	0.781647	-0.33005	1.63114	0.361037	Phosphate transporter protein	AIZ11187.1	3e-175	Triticum aestivum	Undefined
Traes_4AS_5C4ADB91B	-0.0289662	1.9465	4.48072	4.42398	Phosphatidylinositol transfer protein 1-like	XP_003558172.1	0	Brachypodium distachyon	Undefined
Traes_4DL_E5521D4C1	0.0969378	1.1007	4.19157	4.0189	Phosphatidylinositol transfer protein 1-like	XP_003558172.1	0	Brachypodium distachyon	Undefined
Traes_4BL_9E3F7A2E4	-0.0689643	0.582247	3.91404	3.12352	Phosphatidylinositol transfer protein 2	EMT32394.1	5e-118	Aegilops tauschii	Undefined
Traes_2BL_213FDF755	-0.0644312	-0.345474	0.436654	1.9418	Phosphatidylinositol/phosphatidylcholine transfer protein SFH13-like	XP_006659343.1	0	Oryza brachyantha	Undefined
Traes_5BL_CC5BEE88D	-0.614441	-0.697288	-3.21051	-1.57642	Plasma membrane intrinsic protein PIP2;7	ADW85675.1	0	Hordeum vulgare	Undefined
Traes_5DL_8410302DB	-0.86097	-0.75804	-2.08887	-1.18962	Plasma membrane intrinsic protein PIP2;7	ADW85675.1	0	Hordeum vulgare	Undefined
Traes_6AS_4F10F05D2	0.37973	0.494709	1.23634	1.83704	Plastidic ATP/ADP-transporter-like	XP_006648444.1	0	Oryza brachyantha	Undefined
Traes_6BS_A75F2A287	0.457222	0.295636	0.927166	2.44414	Plastidic ATP/ADP-transporter-like	XP_006648444.1	0	Oryza brachyantha	Undefined
Traes_6DS_764EC2D49	0.358617	0.45813	1.82728	2.7302	Plastidic ATP/ADP-transporter-like	XP_006648444.1	0	Oryza brachyantha	Undefined
Traes_7AL_7BD10B6C7	0.457881	0.464538	1.705	2.30184	PDR-like ABC transporter	CAD59565.1	0	Oryza sativa Japonica Group	Undefined
Traes_7AS_E1EA01D49	0.194196	-0.0872047	0.179114	2.86598	PDR-like ABC transporter	CAD59576.1	0	Oryza sativa Japonica Group	Undefined
Traes_5DL_A7D264077	1.24589	-0.84388	0.642739	1.79272	PDR-type ABC transporter	ACL80650.1	0	Triticum aestivum	Undefined
Traes_3DL_920C6D20E	0.500333	-1.82783	-1.16298	-1.09329	PDR-type ABC transporter 2	BAD52527.1	0	Oryza sativa Japonica Group	Undefined
Traes_7DL_CCE27DF79	0.744028	-2.58119	0.720409	2.33013	PDR-type ABC transporter 2	BAD52527.1	0	Oryza sativa Japonica Group	Undefined
Traes_3B_4434107C4	0.563512	-1.54371	-1.01044	-0.854838	PDR-type ABC transporter 2	BAD52527.1	0	Oryza sativa Japonica Group	Undefined
Traes_7BS_CF247665F	0.0928081	-0.260741	0.696866	4.54475	Pleiotropic drug resistance protein 2-like isoform X1	XP_010235369.1	0	Brachypodium distachyon	Undefined
Traes_7DS_D89F89766	-0.306952	-0.364775	1.43128	7.42066	Pleiotropic drug resistance protein 2-like isoform X1	XP_010235369.1	0	Brachypodium distachyon	Undefined
Traes_7DL_D65B7D0F0	1.86154	-0.00484456	-0.424603	-1.28509	Pleiotropic drug resistance protein 3-like	XP_010239576.1	0	Brachypodium distachyon	Undefined
Traes_7AL_7E1C0EDEE	0.58202	0.0931368	2.59624	4.20594	Pleiotropic drug resistance protein 4	EMS61936.1	0	Triticum urartu	Undefined
Traes_5BL_AAE5B3832	1.48884	0.793088	2.35366	3.5614	Pleiotropic drug resistance protein 5	EMS54450.1	0	Triticum urartu	Undefined
Traes_2DS_677AECF17	2.25194	0.638664	-0.790321	-3.30159	Pleiotropic drug resistance protein 5-like	XP_006658621.1	0	Oryza brachyantha	Undefined
Traes_5BS_9B355628D	0.147768	-0.396103	0.230208	0.935598	Polyamine transporter	XP_006664676.1	0	Oryza brachyantha	Undefined
Traes_5DS_CA7EFFF42	0.182566	-0.0927887	0.339127	0.967297	Polyamine transporter	XP_006664676.1	0	Oryza brachyantha	Undefined
Traes_4DS_8D5B431C7	-0.0252354	-1.51783	-0.235279	1.12658	NRT1/ PTR FAMILY 2.11-like	XP_003561175.1	0	Brachypodium distachyon	Undefined
Traes_3B_CCD96A751	0.0557384	0.911411	1.09775	1.85231	Putative disease resistance protein RGA4	EMT07050.1	0	Aegilops tauschii	Undefined
Traes_6BS_94835C92A	0.135495	0.153541	0.36462	-0.736317	Sodium-dependent transporter yocS	EMT02361.1	4e-176	Aegilops tauschii	Undefined
Traes_4DL_5BBB45AF3	-0.0817712	0.415702	-0.307991	-1.39034	Transporter arsB-like isoform X1	XP_006649400.1	0	Oryza brachyantha	Undefined
Traes_5DL_A8D6AD482	0.390972	-0.732583	1.2753	1.36663	Uncharacterized transporter C5D6.04	EMS54288.1	0	Triticum urartu	Undefined
Traes_5BS_0BA23FE30	-0.294914	-0.218823	-0.0193637	1.12173	Ureide permease 1-like	XP_003576085.1	5e-150	Brachypodium distachyon	Undefined
Traes_5BS_52A97D09A	-0.503793	-0.56575	-0.116904	0.953507	Ureide permease 1-like	XP_003576085.1	5e-150	Brachypodium distachyon	Undefined
Traes_5AS_DBE3EBA44	-0.0236385	-0.184053	0.029115	0.902553	Ureide permease 2	ABA98643.2	0	Oryza sativa Japonica Group	Undefined
Traes_2AL_26065F906	-0.57537	0.2663	4.08965	1.75651	Vacuolar cation/proton exchanger 1b-like	XP_006655659.1	0	Oryza brachyantha	Undefined
Traes_2DL_2A2F4F62B	0.287196	1.65273	4.32738	4.06124	Vacuolar cation/proton exchanger 1b-like	XP_006655659.1	0	Oryza brachyantha	Undefined
