# Supplementary material for: Transcriptome Analysis of Early Senescence in the Post-Anthesis Flag Leaf of Wheat (Triticum aestivum L.)
Source: Plants (Basel). 2022 Oct 1;11(19):2593. doi: 10.3390/plants11192593 (PMC9572001; doi:10.3390/plants11192593)
Supplement: Supplementary file 1 [file plants-11-02593-s001.zip › Table S5. Transcription factor-related SAGs.xls]

## Sheet: 展示
Gene_id	Cluster	TF family	Log2(Ratio)				Annotation	Homologue	E value	Species
			0DAA	15DAA	25DAA	30DAA
Traes_3B_F880EDE81	6	ARF	-0.286941	-2.60081	0.545287	2.86433	Auxin responsive protein IAA6	XP_006644688.1	8e-111	Oryza brachyantha
Traes_7AL_1415D04BF	8	ARF	-0.362522	-1.50455	-2.71621	-2.93495	Auxin response factor 17	XP_006656378.1	0	Oryza brachyantha
Traes_2BL_1AED96909	8	ARF	0.2369	-0.867948	-0.974781	-1.08313	Auxin response factor 9-like	XP_006653437.1	0	Oryza brachyantha
Traes_7DL_55ADB3528	11	ARF	-0.0522451	0.179287	1.2997	2.18853	Auxin response factor 18-like	XP_006656399.1	0	Oryza brachyantha
Traes_2BS_10A8CAB27	10	ARR-B	0.142111	-0.41816	4.03413	1.37884	Two-component response regulator ARR2	EMT22828.1	2e-162	Aegilops tauschii
Traes_2AS_4EFA77404	10	ARR-B	-0.388008	-0.353989	3.68494	0.576216	Two-component response regulator ARR2	EMT22828.1	4e-77	Aegilops tauschii
Traes_2AL_92939B028	10	ARR-B	0.230054	1.10016	2.55961	1.35305	Two-component response regulator ARR1	EMT08108.1	1e-166	Aegilops tauschii
Traes_3B_73B7FB5C1	12	ARR-B	-0.384205	-0.140287	-0.827474	-1.69959	GLK2	EMS47265.1	6e-162	Triticum urartu
Traes_7AS_1318B59D3	13	ARR-B	-0.254155	1.26959	2.26484	2.08354	Two-component response regulator ARR2	EMT22828.1	1e-76	Aegilops tauschii
Traes_5BL_1AE458202	13	ARR-B	-0.154205	1.72639	2.47964	2.47486	Two-component response regulator ARR2	EMT28996.1	3e-172	Aegilops tauschii
Traes_7DS_22DE624A5	14	ARR-B	-0.187544	0.983757	2.02018	2.31079	Two-component response regulator ARR12-like	XP_006655852.1	0	Oryza brachyantha
Traes_5DL_B2F166A31	14	ARR-B	0.0558963	0.962366	1.71465	2.02454	Two-component response regulator ARR2	EMT28996.1	4e-155	Aegilops tauschii
Traes_5AS_EBCEA6601	3	bHLH	-0.557034	-3.35353	-3.04816	-2.69045	PIF3	EMT23685.1	5e-88	Aegilops tauschii
Traes_5DL_2A286B481	4	bHLH	0.340884	-3.25533	-1.98188	-0.148644	bHLH92	EMS63808.1	6e-150	Triticum urartu
Traes_5BL_39FD9626E	4	bHLH	0.0445804	-3.63263	-2.38962	-0.306912	bHLH92	EMS63808.1	4e-145	Triticum urartu
Traes_3B_AC3752E39	4	bHLH	0.180778	-2.01046	-1.51421	-0.815794	bHLH41	XP_010231939.1	3e-99	Brachypodium distachyon
Novel08634	4	bHLH	-0.160109	-3.50527	-2.96667	-1.91768	PIF3	EMT23685.1	0	Aegilops tauschii
Novel07951	4	bHLH	0.417694	-3.65162	-2.96257	-1.72398	PIF3	EMT23685.1	1e-159	Aegilops tauschii
Traes_5BL_8C181ECA8	12	bHLH	-0.384324	0.252404	-1.96199	-2.05333	bHLH49	EMS50092.1	1e-122	Triticum urartu
Traes_5BL_6CFCBCCE6	14	bHLH	-0.270238	1.262	2.41063	2.57446	PIF5	EMT29569.1	1e-104	Aegilops tauschii
Traes_5AL_85F3BE385	14	bHLH	-0.119078	0.401027	1.81391	2.55244	PIF5	EMT29569.1	6e-139	Aegilops tauschii
Traes_2BL_C594B831F	14	bHLH	-0.0299791	0.766594	1.25458	1.48767	PIF5	EMT30687.1	1e-117	Aegilops tauschii
Traes_1DL_A2C6C77E8	14	bHLH	0.0853942	0.959122	1.89108	1.97856	ILR3-like	XP_006658659.1	5e-28	Oryza brachyantha
Traes_1AL_81A6723C9	14	bHLH	0.11068	1.22053	2.20085	2.376	ILR3-like	XP_006658659.1	2e-27	Oryza brachyantha
Traes_7DS_F5A240B02	11	BTB/POZ	0.278025	0.71271	1.62244	4.091	BTB/POZ domain-containing protein At1g55760	XP_003574695.2	0	Brachypodium distachyon
Traes_7BS_BCFD2D21A	11	BTB/POZ	-0.0187218	0.345128	2.20195	4.6911	BTB/POZ domain-containing protein At1g55760	XP_003574695.2	4e-111	Brachypodium distachyon
Traes_5AS_2F996234C	10	bZIP	0.222321	0.208984	1.83701	0.537506	Light-inducible protein CPRF2	XP_006664716.1	3e-78	Oryza brachyantha
Traes_4DL_73DC40D7B	11	bZIP	0.164273	0.165251	1.19941	1.91235	TGA2-like isoform X1	XP_003558037.1	0	Brachypodium distachyon
Traes_4BL_DAFEC95DD	11	bZIP	0.160528	-0.047485	0.937664	1.65158	TGA2-like isoform X1	XP_003558037.1	0	Brachypodium distachyon
Traes_4AS_6EDD5ACF7	11	bZIP	0.137688	0.0975084	1.09544	1.84714	TGA2-like isoform X1	XP_003558037.1	0	Brachypodium distachyon
Traes_7AL_A8CAE984E	14	bZIP	0.51607	1.216	2.13379	2.88219	bZIP transcription factor superfamily protein	AFW69519.1	1e-77	Zea mays
Traes_2BL_9528AAD7C	14	bZIP	-0.156163	0.286137	1.55426	1.87657	TGA4	AJC64139.1	0	Triticum aestivum
Traes_2AL_BD0C7A9A5	14	bZIP	-0.418937	0.732727	1.46131	1.97878	TGA4	EMS46353.1	0	Triticum urartu
Traes_1DS_62FDD3493	14	bZIP	-0.452531	-0.820753	0.667041	0.768227	Basic region/leucine zipper protein	BAF99133.1	7e-66	Triticum aestivum
Traes_1AL_E60FA09AE	14	bZIP	0.26886	0.740021	1.70773	2.32382	Leucine-rich repeat-containing protein DDB	XP_003571793.1	0	Brachypodium distachyon
Traes_1AL_F4FE96E3B	9	C2C2-CO-like	-0.0608171	0.283616	0.0910712	-0.996412	Two-component response regulator-like APRR9 isoform X1	XP_008799593.1	6e-99	Phoenix dactylifera
Traes_5AL_852A1474C	10	C2C2-CO-like	-0.192624	0.14607	1.5454	0.92704	Two-component response regulator-like PRR95	EMS53038.1	0	Triticum urartu
Traes_7DL_D8DEE65D6	12	C2C2-CO-like	-0.0757588	-0.356433	-0.89241	-1.3595	CONSTANS-like protein CO6	AAL99266.1	2e-81	Hordeum vulgare
Traes_6DL_9CC066885	12	C2C2-CO-like	-0.623544	-1.04743	-2.79405	-3.49701	CONSTANS-like 16-like	XP_003573014.1	6e-107	Brachypodium distachyon
Traes_5DL_BB69EAD36	12	C2C2-CO-like	-0.493942	0.331134	-1.73247	-2.58539	CONSTANS-like protein	AAM74066.1	2e-85	Hordeum vulgare
Traes_5BL_DB6E9FDB9	12	C2C2-CO-like	-0.541589	-0.0977996	-2.19443	-3.08595	CONSTANS-like protein	AAM74066.1	5e-167	Hordeum vulgare
Traes_4DS_50A614BFB	12	C2C2-CO-like	-0.442971	-0.399126	-1.60904	-2.9628	CONSTANS-like 6	XP_003559520.1	2e-93	Brachypodium distachyon
Traes_4BS_46930D906	12	C2C2-CO-like	-0.418342	0.0635351	-0.996582	-2.51958	CONSTANS-like 6	XP_003559520.1	3e-91	Brachypodium distachyon
Traes_2BL_98439EA10	12	C2C2-CO-like	-0.70275	-0.0849809	-1.66054	-3.10178	CONSTANS-like protein	AAM74069.1	2e-72	Hordeum vulgare
Traes_2BL_119814659	12	C2C2-CO-like	-0.721794	-0.0515958	-1.35946	-3.30881	CONSTANS-like protein	AAM74069.1	5e-28	Hordeum vulgare
Traes_2AL_0E3F538E0	12	C2C2-CO-like	-0.656236	0.185815	-1.21166	-2.65619	CONSTANS-like 4	EMS51986.1	2e-61	Triticum urartu
Traes_5DL_8CE2482E6	14	C2C2-CO-like	0.0418465	-0.0397951	1.90192	1.60204	Two-component response regulator-like PRR95	EMT11831.1	0	Aegilops tauschii
Traes_5BL_417551368	14	C2C2-CO-like	0.175359	0.174144	2.09648	1.83626	Two-component response regulator-like PRR95	EMT11831.1	0	Aegilops tauschii
Traes_4BS_4BCA03A6C	14	C2C2-CO-like	-0.078934	-0.301098	0.742723	0.668836	Two-component response regulator-like PRR95	EMT20128.1	0	Aegilops tauschii
Traes_4AS_512DDDECB	14	C2C2-CO-like	0.457759	0.726434	1.65346	1.61279	CONSTANS-LIKE 13	EMS65502.1	0	Triticum urartu
Traes_6DL_6A7EFC4661	9	C2C2-Dof	-0.285205	-0.0583823	-0.626441	-2.32023	Dof zinc finger protein 8	CAJ29313.1	7e-47	Hordeum vulgare
Traes_5BS_88AF62B60	12	C2C2-GATA	-0.064839	-0.868261	-2.23138	-4.14757	GATA transcription factor 4	EMT25721.1	0	Aegilops tauschii
Traes_5BL_7F56360BF	6	C2H2	-1.77459	-2.95075	-1.69039	-0.410688	Zinc finger protein 1	EMT26094.1	1e-64	Aegilops tauschii
Traes_6DL_244C908B5	10	C2H2	0.025203	-0.0737748	1.05143	0.430749	Zinc finger protein MAGPIE	EMT33634.1	0	Aegilops tauschii
Traes_1AL_D3485D1FF	11	C2H2	-0.267887	-0.360136	1.62853	2.46447	TRANSPARENT TESTA 1-like	XP_003566203.1	6e-80	Brachypodium distachyon
Traes_4DS_276818E4F	12	C2H2	0.929946	0.34311	-0.743592	-3.08426	Zinc finger protein 1	EMT16810.1	3e-69	Aegilops tauschii
Traes_5DS_5C96A0023	12	C3H	0.138209	-0.319381	-1.19851	-1.68626	Zinc finger CCCH domain-containing protein 19-like	XP_003576058.1	4e-63	Brachypodium distachyon
Traes_5BS_DD7558B02	12	C3H	0.158668	-0.100447	-1.10533	-1.55576	Zinc finger CCCH domain-containing protein 19-like	XP_003576058.1	3e-59	Brachypodium distachyon
Traes_3B_6BDE5B957	12	C3H	-0.287534	0.156714	-0.69423	-1.18221	Zinc finger CCCH domain-containing protein 12	EMS50271.1	0	Triticum urartu
Traes_4BS_B7B7EFF37	10	CCAAT	0.114631	0.379862	1.63064	0.69097	Nuclear transcription factor Y subunit A-4-like	XP_003560983.1	4e-110	Brachypodium distachyon
Traes_4DL_F512146B2	12	CCAAT	-0.558452	-0.635911	-1.7437	-4.10238	CCAAT-binding transcription factor C	AIZ68327.1	6e-68	Triticum aestivum
Traes_4AS_73658DB91	12	CCAAT	-0.471889	-0.680467	-1.61747	-3.57287	CCAAT-binding transcription factor C	AIZ68327.1	3e-70	Triticum aestivum
Traes_2BS_EB80B2584	13	CCAAT	0.135037	1.58258	1.50151	2.15137	H2A-4	BAA07278.1	1e-53	Triticum aestivum
Traes_2AS_E1BC5FF2C	13	CCAAT	0.161706	1.46121	1.34523	1.89635	H2A-4	BAA07278.1	1e-53	Triticum aestivum
Traes_3B_BCD2388E9	9	DBP	-0.046819	0.171369	-0.213001	-1.15862	Protein phosphatase 2C	ABO32801.1	1e-114	Hordeum vulgare
Traes_6BL_CB82A5A65	10	DBP	0.298643	1.4256	3.4807	2.6457	Protein phosphatase 2C 27	EMS64046.1	0	Triticum urartu
Traes_6AL_412CE3037	10	DBP	0.507977	0.593904	2.50385	1.88305	Protein phosphatase 2C 27	EMS64046.1	0	Triticum urartu
Traes_4AS_CDC673BD9	13	DBP	-0.320518	1.61168	2.48154	1.92973	Protein phosphatase 2C 30	AGL93150.1	1e-162	Triticum aestivum
Traes_3B_04704B20F	13	DBP	0.0304328	1.14729	1.71701	1.61901	Protein phosphatase 2C 6	EMS62830.1	0	Triticum urartu
Traes_1DL_19271CD0B	13	DBP	0.0315973	1.75221	2.35043	2.43419	Protein phosphatase 2C 50	EMS55824.1	1e-104	Triticum urartu
Traes_1AL_C87568D4D	13	DBP	0.0700216	2.04376	2.64076	2.77114	Protein phosphatase 2C 50	EMS55824.1	1e-86	Triticum urartu
Traes_3B_81C936C24	14	DBP	0.272585	1.4456	2.9284	3.11529	Protein phosphatase 2C 50	EMT22583.1	1e-154	Aegilops tauschii
Traes_1AL_B5C73E7E6	14	DBP	0.339701	-0.0765961	1.27662	1.51122	Protein phosphatase 2C 47	EMT10782.1	0	Aegilops tauschii
Traes_4BL_F34EBD618	6	EIL	0.194199	-0.483033	0.27191	0.608644	Ethylene-insensitive-3-like protein	BAB78462.2	0	Oryza sativa Japonica Group
Traes_4AS_2BDA1260C	6	EIL	-0.0984152	-0.702235	-0.178811	0.448327	Ethylene-insensitive-3-like protein	ABF95697.1	0	Oryza sativa Japonica Group
Traes_2BS_D007D6598	8	GRAS	-0.638408	-1.30458	-1.61845	-2.20087	Chitin-inducible gibberellin-responsive protein 2-like	XP_006657889.1	0	Oryza brachyantha
Traes_2AS_7BD3963BD	8	GRAS	-0.68735	-1.74356	-1.60561	-2.0097	Chitin-inducible gibberellin-responsive protein 2-like	XP_006657889.1	0	Oryza brachyantha
Traes_2BL_46E59998A1	14	GRAS	-0.584345	-0.0439229	0.722029	1.47149	Scarecrow-like protein 8	XP_003580377.1	0	Brachypodium distachyon
Traes_7DL_0CEFCB39D	13	HMG	-0.228916	1.16694	1.38039	1.01127	HMG1/2-like protein	EMT12582.1	5e-38	Aegilops tauschii
Traes_7BL_F45C15FA2	13	HMG	-0.203155	0.940064	1.0461	0.816011	HMG1/2-like protein	EMT12582.1	5e-24	Aegilops tauschii
Novel00084	3	HSF	1.11625	-1.39558	-1.78188	-1.03189	Heat shock factor A4c	AHZ44767.1	0	Triticum aestivum
Traes_5AL_16AD8DEEC	10	HSF	-0.209193	-0.00555755	1.82917	1.16266	Heat stress transcription factor A-2e	EMT02670.1	3e-176	Aegilops tauschii
Traes_1AL_A4B5C1474	13	HSF	-1.0091	1.16753	2.44281	1.17682	Heat stress transcription factor A-2c	EMT24571.1	0	Aegilops tauschii
Traes_1AL_55E4D53AF	3	Jumonji	0.0281466	-3.30349	-3.1474	-2.03226	Lysine-specific demethylase 5C-like	XP_006662104.1|	0	Oryza brachyantha
Traes_2BS_4818EA1FF	12	MADS	-0.131665	0.0953339	-0.677603	-1.89263	AGL10	ABF57915.1	6e-111	Triticum aestivum
Traes_7DL_090D0E08E	5	MYB	0.330251	0.704071	3.52308	-0.600731	PHR1-LIKE 1-like	XP_006657316.1	2e-125	Oryza brachyantha
Traes_7AL_D45376F32	5	MYB	-0.0647849	-0.0749702	1.72643	-0.0696746	PHR1-LIKE 1-like	XP_006657316.1	6e-128	Oryza brachyantha
Traes_2AL_660616C44	5	MYB	0.274946	0.932817	2.38295	0.574945	MYB-like protein G	EMT17444.1	0	Aegilops tauschii
Traes_2DL_7183519F8	6	MYB	-0.411266	-1.88347	-0.0385371	0.226281	MYB4	EMT12739.1	1e-103	Aegilops tauschii
Traes_2BL_0501BC320	6	MYB	-0.573563	-1.3762	0.214692	0.496306	MYB4	EMT12739.1	5e-117	Aegilops tauschii
Traes_2DL_31EED5C94	7	MYB	0.688964	1.52912	2.31683	0.236168	MYB-like protein G	EMT17444.1	0	Aegilops tauschii
Traes_2BL_3041037F1	7	MYB	0.659262	1.36308	2.48835	-0.864058	MYB-like protein G	EMT17444.1	0	Aegilops tauschii
Traes_3DL_30CF35BB3	9	MYB	-0.681453	-0.236052	-0.701084	-2.02983	MYB-related protein	AEV91173.1	2e-40	Aegilops speltoides
Traes_1AL_297FBF3A3	10	MYB	-0.223561	0.347966	1.3595	0.741044	MYBS3	CAJ53899.1	2e-180	Hordeum vulgare
Traes_6AS_DBE4E3146	11	MYB	-0.398046	0.224742	3.18657	4.65028	APL	EMT19311.1	0	Aegilops tauschii
Traes_5DS_DE2C70E4C	11	MYB	0.480047	-1.26704	1.54699	5.71231	MYB21	EMT25040.1	9e-168	Aegilops tauschii
Traes_5BS_95A52A87F	11	MYB	0.359622	-0.0516031	1.16096	5.51666	MYB21	EMT25040.1	4e-161	Aegilops tauschii
Traes_5AS_D9A4C1AB0	11	MYB	1.26798	-0.0361555	2.2026	6.0913	MYB21	EMT25040.1	2e-136	Aegilops tauschii
Traes_4DL_3849A9A5F	11	MYB	-0.573173	-0.0139548	0.0776569	1.04797	Telomere repeat-binding protein 5	EMS66146.1	0	Triticum urartu
Traes_4BL_AB2636FB0	11	MYB	-0.485282	0.19158	0.475342	1.97427	Telomere repeat-binding protein 5	EMS66146.1	0	Triticum urartu
Traes_5DL_92CBBE968	13	MYB	-1.75865	-0.48869	-0.267738	0.290756	MYB44-like	XP_003575562.1	3e-79	Brachypodium distachyon
Traes_3AL_A8AF980F3	13	MYB	1.00247	2.86371	4.21816	4.01332	MYB13	AGO59325.1	8e-77	Triticum aestivum
Traes_4AS_FA7E65184	14	MYB	0.0348128	0.791644	2.25491	2.98544	Telomere repeat-binding protein 5	EMS66146.1	0	Triticum urartu
Traes_3AS_965E2F790	14	MYB	0.568516	0.828095	2.61625	2.9094	MYB1R1-like	XP_006645587.1	1e-109	Oryza brachyantha
Traes_7DL_A8C4FFABB	8	NAC	0.0539932	-2.21334	-3.58694	-4.09235	NAC domain-containing protein 67-like	XP_004966508.1	4e-77	Setaria italica
Traes_4AS_B95A1C3A1	11	NAC	0.14511	0.267607	1.16862	3.00474	CUP-SHAPED COTYLEDON 2	EMT25084.1	0	Aegilops tauschii
Traes_2AL_57BF37A86	11	NAC	0.699416	0.737977	4.1972	5.33699	CUP-SHAPED COTYLEDON 2	EMT25749.1	0	Aegilops tauschii
Traes_6DL_1ABE78799	11	NAC	-0.314884	1.07855	2.87268	6.52348	NAC domain-containing protein 21/22	EMT24300.1	0	Aegilops tauschii
Traes_6AL_B92597EA9	11	NAC	0	0.310375	1.92293	6.75479	NAC domain-containing protein 21/22	EMT24300.1	2e-165	Aegilops tauschii
Traes_5DL_D1D0CA79E	11	NAC	0.554822	1.56843	2.86796	4.89671	NAC domain-containing protein 29	EMT14095.1	0	Aegilops tauschii
Traes_5BL_CC18CAD72	11	NAC	0.910022	1.02441	3.19073	5.88664	NAC domain-containing protein 29	EMT14095.1	0	Aegilops tauschii
Traes_5AL_7ED9D05C5	11	NAC	0.518183	1.67121	3.17788	6.55617	NAC domain-containing protein 29	EMS63116.1	3e-101	Triticum urartu
Traes_4DL_F0BE36C9D	11	NAC	1.05018	1.48611	3.34741	4.26329	NAC domain-containing protein 29	EMS63328.1	0	Triticum urartu
Traes_2AL_8A23618BA	11	NAC	0	1.63861	3.32403	9.22063	NAC domain-containing protein 29	EMT15405.1	6e-119	Aegilops tauschii
Novel03975	11	NAC	-0.993787	-0.378737	3.67042	5.73849	NAC domain-containing protein 29	EMS59098.1	2e-114	Triticum urartu
Traes_3B_913263509	11	NAC	-0.199937	-0.52924	0.481889	1.38777	NAC domain-containing protein 48	EMT29472.1	2e-80	Aegilops tauschii
Traes_6AL_8BA1FF8B2	11	NAC	0.114293	0.240134	0.921393	1.41102	NAC domain-containing protein 78	EMS63008.1	0	Triticum urartu
Traes_1DL_F410CF9FD	11	NAC	0.0698226	-0.196288	0.227141	1.00469	NAC domain-containing protein 78	EMT22201.1	0	Aegilops tauschii
Traes_1BL_9018AA7BA	11	NAC	-0.0108324	0.00536937	0.425498	1.31896	NAC domain-containing protein 78	EMT22201.1	0	Aegilops tauschii
Traes_1AL_C4FA8404A	11	NAC	0.0692936	0.034148	0.514719	1.39872	NAC domain-containing protein 78	EMT22201.1	0	Aegilops tauschii
Traes_3B_8BB0A0443	11	NAC	-1.62671	-0.674979	0.971385	3.37293	NAC domain-containing protein 8	EMS64790.1	6e-175	Triticum urartu
Traes_5BL_456C3408A	11	NAC	1.67163	1.33227	3.22117	3.91739	NAC transcription factor	CBZ41168.1	4e-76	Hordeum vulgare
Traes_5AS_E5FD82E36	11	NAC	0.194017	0.638291	3.56729	4.93624	NAC transcription factor 6A	AET10458.1	0	Triticum aestivum
Traes_2AL_8EE7F34F6	12	NAC	-0.120239	-0.646661	-1.9877	-3.2698	NAC domain-containing protein 7	EMT16679.1	3e-171	Aegilops tauschii
Traes_2AL_61C5A2D03	12	NAC	0.491423	-0.86388	-2.37418	-4.76049	NAC domain-containing protein 7	EMT16679.1	2e-113	Aegilops tauschii
Traes_6DS_90A627C3F	13	NAC	1.77945	4.6082	5.76935	5.96083	AeNAM-D1	ABI94354.1	0	Aegilops tauschii
Traes_6AS_6F89CC969	13	NAC	0.613084	4.25224	4.69382	4.36039	TtNAM-A1	ABI94352.1	0	Triticum turgidum
Traes_2BS_58AA829F4	13	NAC	0.740071	4.73893	5.33194	5.166	TtNAM-B2	ABI94355.1	0	Triticum turgidum
Traes_4DL_D84567626	14	NAC	-0.187538	0.448917	1.39175	2.11579	CUP-SHAPED COTYLEDON 2	EMT25084.1	0	Aegilops tauschii
Traes_3B_BB32DAA31	14	NAC	0.790717	2.36013	6.96372	8.36864	NAC transcription factor	ADG85701.1	2e-122	Triticum aestivum
Traes_2DS_85FE89BC5	14	NAC	0.527107	2.12446	5.80116	6.17247	CUP-SHAPED COTYLEDON 2	EMT27197.1	6e-99	Aegilops tauschii
Traes_2DS_291916365	14	NAC	0.302522	0.468683	4.00894	4.65366	CUP-SHAPED COTYLEDON 2	EMT27197.1	1e-63	Aegilops tauschii
Traes_2BS_C116E5668	14	NAC	-0.456693	1.43731	4.18683	4.77306	NAC domain-containing protein 29	EMT28859.1	0	Aegilops tauschii
Traes_2BS_00566A85C	14	NAC	0.552729	1.31599	4.7022	4.88621	NAC transcription factor	CBZ41151.1	1e-151	Hordeum vulgare
Traes_2AS_7AAACC26B	14	NAC	0.524749	1.13742	4.41908	4.41869	NAC transcription factor	CBZ41151.1	2e-122	Hordeum vulgare
Novel02266	14	NAC	0.377248	1.40757	4.91422	6.01311	NAC domain-containing protein 29	EMT28157.1	0	Aegilops tauschii
Traes_7AS_5B2A618A2	14	RB	0.431228	2.03962	3.14591	3.54034	RBR1	A9UL13.1	0	Triticum aestivum
Traes_2AL_0F613C5AB	14	RWP-RK	0.371144	0.928281	1.52105	1.96311	NLP2	EMS47666.1	0	Triticum urartu
Traes_1AL_0C41C44B1	1	Sigma70-like	-0.144943	2.52866	1.81092	0.587771	RNA polymerase sigma factor sigE	XP_006655642.1	0	Oryza brachyantha
Traes_5DL_8DC4CC983	12	Sigma70-like	-0.186593	0.247701	-0.344792	-1.17712	RNA polymerase sigma factor sigF	XP_006659237.1	0	Oryza brachyantha
Traes_5BL_B1F704307	12	Sigma70-like	-0.271261	-0.0776068	-1.03786	-1.41614	RNA polymerase sigma factor sigF	XP_006659237.1	0	Oryza brachyantha
Traes_4DL_B8D22E4C2	12	Sigma70-like	-0.0147002	-0.039178	-1.80166	-2.31407	RNA polymerase sigma factor sigB	XP_006651247.1	0	Oryza brachyantha
Traes_4AS_DE644E0CF	12	Sigma70-like	0.0839448	-0.264927	-1.62523	-2.69636	RNA polymerase sigma factor sigB	XP_006651247.1	0	Oryza brachyantha
Traes_4AL_A0565AC4C	12	Sigma70-like	-0.235157	-0.184624	-1.36991	-2.35682	RNA polymerase sigma factor sigF	XP_006659237.1	0	Oryza brachyantha
Traes_5DL_4186C5347	2	Tify	0.137738	-3.36662	-1.07878	0.761017	TIFY 10A	XP_003578176.2	5e-69	Brachypodium distachyon
Traes_5AL_BB55F989A	2	Tify	0.00194661	-3.28959	-1.01603	1.40933	TIFY 10A	XP_003578176.2	2e-60	Brachypodium distachyon
Traes_4DL_E25D3DF01	6	Tify	-1.81391	-4.09049	-2.12694	0.17348	TIFY 10A-like	XP_003558665.1	6e-31	Brachypodium distachyon
Traes_2DS_C0C75D1D7	6	Tify	0.212598	-0.71129	0.668183	1.88786	TIFY 10B-like isoform X2	XP_010235620.1	1e-110	Brachypodium distachyon
Traes_2BS_2C79AE2DE	6	Tify	0.0542968	-0.77084	0.565229	1.87147	TIFY 10B-like isoform X2	XP_010235620.1	1e-107	Brachypodium distachyon
Traes_2AS_A8CCC32D3	6	Tify	0.144403	-1.03628	0.299041	1.88478	TIFY 10A-like	XP_003572804.1	1e-108	Brachypodium distachyon
Traes_2BL_181C4AA28	7	Tub	-0.143722	-0.221227	0.445091	-1.03505	Tubby-like F-box protein 7	EMS53157.1	0	Triticum urartu
Traes_2AL_436D234EE	9	Tub	-0.334377	-0.587761	-0.549084	-1.57496	Tubby-like F-box protein 7	EMS53157.1	0	Triticum urartu
Traes_1DS_A6733B734	2	WRKY	-0.362175	-2.8465	-0.93158	0.247116	WRKY2	ACD80357.1	0	Triticum aestivum
Traes_1BS_EF67E5A24	2	WRKY	-0.277765	-3.44605	-0.798476	0.430664	WRKY14	ACD80359.1	0	Triticum aestivum
Traes_1AS_F3EAEC435	2	WRKY	-0.40001	-2.80126	-1.09367	0.404877	WRKY53	AGF90798.1	0	Triticum aestivum
Traes_5DL_C93641E43	3	WRKY	-0.863742	-3.79675	-3.93047	-2.8158	WRKY41	EMS47277.1	0	Triticum urartu
Traes_3B_990298FF5	4	WRKY	-1.43727	-4.56976	-3.83187	-2.33251	WRKY27	ACD80363.1	0	Triticum aestivum
Traes_3B_CDA5ADD75	6	WRKY	-0.0371568	-0.540582	0.290365	0.671117	WRKY6	EMS55197.1	0	Triticum urartu
Traes_5BL_F853EA802	8	WRKY	-0.706148	-2.98306	-3.73341	-3.7584	WRKY74b	ABO15544.1	0	Triticum aestivum
Traes_5BL_8BEF7F9CD	8	WRKY	1.47606	-0.799199	-0.722171	-2.94435	WRKY3	ABR87001.1	0	Hordeum vulgare
Traes_3B_F45FCFE62	8	WRKY	-0.0494063	-2.31429	-2.84011	-3.36955	WRKY50	ALC04267.1	2e-118	Triticum aestivum
Traes_3B_E408A7B56	8	WRKY	0.82735	-1.74772	-2.22019	-3.40542	WRKY5	CAH68821.1	6e-118	Hordeum vulgare
Traes_5BL_6054E8EC9	11	zf-HD	-0.532746	-0.0681896	0.746199	2.07084	ZF-HD homeobox protein At4g24660-like	XP_006663173.1	1e-24	Oryza brachyantha
Traes_5DL_1F0881CE1	14	zf-HD	-0.241008	0.147032	1.73496	2.19235	ZF-HD homeobox protein At4g24660-like	XP_006663173.1	1e-24	Oryza brachyantha
