# Supplementary material for: Transcriptome Analysis of Early Senescence in the Post-Anthesis Flag Leaf of Wheat (Triticum aestivum L.)
Source: Plants (Basel). 2022 Oct 1;11(19):2593. doi: 10.3390/plants11192593 (PMC9572001; doi:10.3390/plants11192593)
Supplement: Supplementary file 1 [file plants-11-02593-s001.zip › Table S6. Phytohormone-related SAGs.xls]

## Sheet: Sheet1
Gene_id	Log2(Ratio)				Hormone	Homologue	Annotation	Homologue	E value	Species	Function
	0DAA	15DAA	25DAA	30DAA
Traes_3B_91AC06652	0.0255195	0.683657	1.03302	1.60998	ABA	AHK3	Histidine kinase J	EMT25502.1	0	Aegilops tauschii	Signal transduction
Traes_3DL_DB4F4CB29	-0.0893732	0.80527	1.4679	2.04162	ABA	AHK3	Histidine kinase J	EMT25502.1	0	Aegilops tauschii	Signal transduction
Traes_5AL_F96AEDDB8	0.163806	1.06815	3.1917	4.70999	ABA	ALDH7B4	Aldehyde dehydrogenase 7b	ADJ67791.1	0	Triticum aestivum	Signal transduction
Traes_5BL_62D9B877B	0.357718	1.46525	4.30199	5.31125	ABA	ALDH7B4	Aldehyde dehydrogenase 7b	ADJ67791.1	0	Triticum aestivum	Signal transduction
Traes_5DL_A2A5A19B4	0.237029	1.52602	5.26193	6.69426	ABA	ALDH7B4	Aldehyde dehydrogenase 7b	ADJ67791.1	0	Triticum aestivum	Signal transduction
Traes_7BL_7A3B8A199	-0.0763636	0.352756	1.24299	2.35629	ABA	CAT3	Catalase 3	AKP21071.1	0	Triticum aestivum	Signal transduction
Traes_7DL_44F6042FE	-0.123556	0.0105741	1.55168	2.59534	ABA	CAT3	Catalase 3	AKP21071.1	0	Triticum aestivum	Signal transduction
Traes_4AL_D787CF1CC	0.954524	-0.366521	-0.800415	-0.766935	ABA	CDPK2	Calcium-dependent protein kinase	ABC59621.1	0	Triticum aestivum	Signal transduction
Traes_2BS_4F489C2B9	-0.633522	-1.96914	-2.01672	-1.5645	ABA	CDPK2	Calcium-dependent protein kinase	ABY59017.1	0	Triticum aestivum	Signal transduction
Traes_2DS_C80293002	-0.216977	0.397904	0.349412	1.13103	ABA	CSLD5	Cellulose synthase A catalytic subunit 8 (UDP-forming)	EMT09789.1	0	Aegilops tauschii	Signal transduction
Traes_2AS_665AF9500	0.0719731	0.313187	0.43593	1.26063	ABA	CSLD5	Cellulose synthase A catalytic subunit 8 (UDP-forming)	EMT09789.1	0	Aegilops tauschii	Signal transduction
Traes_2BS_E67494A11	-0.233926	-0.134337	-1.43097	-3.38303	ABA	GUN5	Protoporphyrin IX Mg-chelatase subunit precursor	AAA99721.1	0	Hordeum vulgare subsp. Vulgare	Receptor
Traes_2DS_DBD06E18F	-0.113938	0.0426402	-1.41399	-3.33217	ABA	GUN5	Protoporphyrin IX Mg-chelatase subunit precursor	AAA99721.1	1e-150	Hordeum vulgare subsp. Vulgare	Receptor
Traes_2AS_B6BA92570	-0.319902	-0.233499	-2.80562	-4.12417	ABA	GUN5	Protoporphyrin IX Mg-chelatase subunit precursor	AAA99721.1	0	Hordeum vulgare subsp. Vulgare	Receptor
Traes_1BS_85C7EF9D4	-0.00630423	-0.448421	-1.32497	-1.96548	ABA	PLDALPHA2	Phospholipase D alpha 1	EMT24153.1	0	Aegilops tauschii	Signal transduction
Traes_4AS_CDC673BD9	-0.310507	1.58425	2.448	1.89964	ABA	PP2C 30	Protein phosphatase 2C 30	AGL93150.1	1e-162	Triticum aestivum	Signal transduction
Traes_3B_81C936C24	0.260365	1.40017	2.86566	3.05137	ABA	PP2C 50	Protein phosphatase 2C 50	EMT22583.1	1e-154	Aegilops tauschii	Signal transduction
Traes_1AL_C87568D4D	0.0686205	2.02119	2.61572	2.74568	ABA	PP2C 50	Protein phosphatase 2C 50	EMS55824.1	1e-86	Triticum urartu	Signal transduction
Traes_1DL_19271CD0B	0.0309149	1.72989	2.32489	2.40829	ABA	PP2C 50	Protein phosphatase 2C 50	EMS55824.1	1e-104	Triticum urartu	Signal transduction
Traes_3B_04704B20F	0.0300371	1.13685	1.70376	1.60617	ABA	ABI1	Protein phosphatase 2C 6	EMS62830.1	0	Triticum urartu	Signal transduction
Traes_2DS_9A99C3160	-0.406293	-2.02377	-2.94074	-4.13193	ABA	PYL4	Abscisic acid receptor PYL4	XP_006651284.1	1e-29	Oryza brachyantha	Receptor
Traes_1DS_4BB707532	0.13513	-0.144288	0.382596	0.924029	ABA	PYL8	Abscisic acid receptor PYL8	XP_003568737.1	3e-115	Brachypodium distachyon	Receptor
Traes_1AL_7EAFBE83A	0.369926	-1.66085	1.82369	-0.588549	ABA	RBOHB	Respiratory burst oxidase-F-like protein	EMT31127.1	0	Aegilops tauschii	Signal transduction
Traes_2DL_6CD064E13	0.623546	2.45026	2.88661	2.48924	ABA	SNRK2	Serine-threonine protein kinase	ABD37622.1	0	Triticum aestivum	Signal transduction
Traes_2DS_34BEEC8AB	0.610604	-0.855864	-1.17336	-1.42861	ABA	SNRK2.2	SNF1-type serine-threonine protein kinase	AHC00227.1	0	Triticum polonicum	Signal transduction
Traes_2BS_9D77461D8	0.610901	-0.871087	-1.50343	-2.16826	ABA	SNRK2.2	SNF1-type serine-threonine protein kinase	AHC00227.1	0	Triticum polonicum	Signal transduction
Traes_5AS_16B1B6B87	-0.36607	0.609576	2.03598	2.68452	ABA	SNRK2.2	Serine/threonine-protein kinase SAPK9	EMS68031.1	0	Triticum urartu	Signal transduction
Traes_5BS_78EC147D8	-0.267851	0.0989241	0.822271	1.58543	ABA	SNRK2.2	Serine/threonine-protein kinase SAPK9	EMS68031.1	0	Triticum urartu	Signal transduction
Traes_1AL_5D3EECC71	0.163872	1.02317	1.75614	1.39135	AUX	Actin 1	Actin-2	XP_003574188.1	0	Brachypodium distachyon	Undefined
Traes_1DL_9926BBAE1	0.180446	0.724666	1.8123	1.10678	AUX	Actin 1	Actin-2	NP_001146931.1	0	Zea mays	Undefined
Traes_3AL_0D64FFEF1	0.280185	0.371147	1.30011	1.64673	AUX	Actin 1	Actin-7	EMT10897.1	3e-122	Aegilops tauschii	Undefined
Traes_3B_319690489	0.278546	0.530811	1.72106	2.07073	AUX	Actin 1	Actin-7	EMT10897.1	0	Aegilops tauschii	Undefined
Traes_5AL_8E706641D	-0.291799	0.231394	-1.35597	-1.38497	AUX	Actin 1	Actin-3	EMS60494.1	0	Triticum urartu	Undefined
Traes_5BL_4BD0ED173	-0.188741	0.139656	-0.606609	-1.50174	AUX	Actin 1	Actin-3	EMS60494.1	0	Triticum urartu	Undefined
Traes_5DL_95E144096	-0.131257	0.483391	-0.630493	-1.0685	AUX	Actin 1	Actin-3	EMS60494.1	0	Triticum urartu	Undefined
Traes_1AL_E195290EF	0.180333	1.03041	1.42126	2.01786	AUX	Actin 1	Actin-7	EMS62134.1	0	Triticum urartu	Undefined
Traes_1BL_56BBB4B2F	0.207219	0.98593	2.21243	1.88168	AUX	Actin 1	Actin-2	NP_001146931.1	0	Zea mays	Undefined
Traes_1BL_D0A3F2067	-0.00566215	1.02012	1.65044	2.19286	AUX	Actin 1	Actin-7	EMS62134.1	0	Triticum urartu	Undefined
Traes_1DL_727F09EF8	0.187368	0.832607	1.31188	1.6905	AUX	Actin 1	Actin-7	EMS62134.1	0	Triticum urartu	Undefined
Traes_2BL_1AED96909	0.2369	-0.867948	-0.974781	-1.08313	AUX	ARF1	Auxin response factor 9-like	XP_006653437.1	0	Oryza brachyantha	Signal transduction
Traes_7AL_1415D04BF	-0.362522	-1.50455	-2.71621	-2.93495	AUX	ARF6	Auxin response factor 17	XP_006656378.1	0	Oryza brachyantha	Signal transduction
Traes_3B_95F335BEE	-0.216916	1.62665	3.38117	5.83913	AUX	GH3.1	Indole-3-acetic acid-amido synthetase GH3.2	XP_003569888.1	0	Brachypodium distachyon	Signal transduction
Traes_2BS_A9BF5F962	-0.320868	-0.186754	2.47428	3.31222	AUX	GH3.1	Indole-3-acetic acid-amido synthetase GH3.8	XP_003562778.1	0	Brachypodium distachyon	Signal transduction
Traes_3B_F880EDE81	-0.286941	-2.60081	0.545287	2.86433	AUX	IAA6	Auxin responsive protein IAA6	XP_006644688.1	0	Oryza brachyantha	Signal transduction
Traes_6AL_1DC152BCD	-0.461048	0.868632	-0.61855	-1.84507	AUX	SAUR	SAUR12-auxin-responsive SAUR family member	AFW64330.1	7e-36	Zea mays	Signal transduction
Traes_1AL_13807565F	0.0261542	0.937915	1.60907	0.974573	AUX	SAUR56	SAUR56-auxin-responsive SAUR family member	NP_001150182.1	5e-36	Zea mays	Signal transduction
Traes_3AS_76A815719	0.0598177	1.01183	1.25904	1.93497	AUX	TPL	Topless-related protein 2	EMS62858.1	0	Triticum urartu	Signal transduction
Traes_3B_5AAD28F95	-0.00733647	0.786716	0.964629	1.46458	AUX	TPL	Topless-related protein 2	EMS62858.1	0	Triticum urartu	Signal transduction
Traes_3DS_DEE36BCD2	0.165289	0.983776	1.29842	2.041	AUX	TPL	Topless-related protein 2	EMS62858.1	0	Triticum urartu	Signal transduction
Traes_4BS_A834E1175	0.288498	0.595961	1.3658	1.81839	AUX	APM1	Aminopeptidase M1-B	XP_003574451.1	0	Brachypodium distachyon	Hormone tranport
Traes_4DS_3CD86327C	0.399191	0.651863	1.3906	1.71889	AUX	APM1	Puromycin-sensitive aminopeptidase	EMT27862.1	0	Aegilops tauschii	Hormone tranport
Traes_6AS_ADCD6AB01	0.445955	0.68343	1.34305	2.42351	AUX	APM1	Puromycin-sensitive aminopeptidase	EMT06243.1	0	Aegilops tauschii	Hormone tranport
Traes_6BS_8C5C8E9E2	0.294451	0.733426	1.42374	2.38404	AUX	APM1	Puromycin-sensitive aminopeptidase	EMT27862.1	0	Aegilops tauschii	Hormone tranport
Traes_6DS_CDCAD6797	0.320079	0.744244	1.55286	2.69574	AUX	APM1	Puromycin-sensitive aminopeptidase	EMT06243.1	0	Aegilops tauschii	Hormone tranport
Traes_3AL_314D5C929	-0.120331	0.0634648	0.899379	1.11966	AUX	AEC	Auxin efflux carrier family protein-like	BAD73344.1	0	Oryza sativa Japonica Group	Hormone tranport
Traes_3DL_7A1FCF1DE	-0.120735	-0.223483	0.787259	1.05951	AUX	AEC	Auxin efflux carrier family protein-like	BAD73344.1	0	Oryza sativa Japonica Group	Hormone tranport
Traes_7AS_0EA301557	0.378023	1.31339	1.28445	1.73719	AUX	AVP1	Pyrophosphate-energized vacuolar membrane proton pump	EMT29715.1	0	Aegilops tauschii	Hormone tranport
Traes_7AS_848028906	0.29688	1.1146	1.15092	1.65014	AUX	AVP1	Pyrophosphate-energized vacuolar membrane proton pump	EMT29715.1	0	Aegilops tauschii	Hormone tranport
Traes_7BL_3D2347238	-0.622561	-0.740769	-3.49776	-4.6971	AUX	AVP1	Pyrophosphate-energized vacuolar membrane proton pump 1	EMS53286.1	4e-85	Triticum urartu	Hormone tranport
Traes_7BL_FD4254327	-0.704586	-1.00175	-3.46916	-4.87574	AUX	AVP1	Pyrophosphate-energized vacuolar membrane proton pump 1	EMS53286.1	0	Triticum urartu	Hormone tranport
Traes_7DL_3BA7EF708	-0.437972	-0.601041	-2.26658	-3.09645	AUX	AVP1	Pyrophosphate-energized vacuolar membrane proton pump 1	EMS53286.1	0	Triticum urartu	Hormone tranport
Traes_3B_C0FA00AC4	-0.316714	-0.803623	-2.33677	-2.49454	AUX	LAX3	Auxin transporter-like protein 1-like	XP_006645042.1	0	Oryza brachyantha	Hormone tranport
Traes_2AL_CB95E606C	0.349474	1.39632	1.64505	1.37246	AUX	PGP11	ABC transporter B family member 19-like	XP_003579371.1	0	Brachypodium distachyon	Hormone tranport
Traes_1AL_564D5A1A0	0.166123	0.277126	0.900121	1.60801	AUX	CHY1	3-hydroxyisobutyryl-CoA hydrolase 1	EMS52252.1	0	Triticum urartu	Signal transduction
Traes_1BL_B90019AF3	0.095572	0.371621	1.27021	1.78002	AUX	CHY1	3-hydroxyisobutyryl-CoA hydrolase 1	EMS52252.1	0	Triticum urartu	Signal transduction
Traes_1DL_18AD66E3B	0.0499122	-0.135134	0.19612	0.981623	AUX	CHY1	3-hydroxyisobutyryl-CoA hydrolase 1	EMS52252.1	0	Triticum urartu	Signal transduction
Traes_5DS_922F3F6EA	0.443421	-0.313195	-0.930174	-1.0993	AUX	NDPK3	Nucleoside diphosphate kinase 2, chloroplastic	NP_001289807.1	3e-113	Brachypodium distachyon	Signal transduction
Traes_5AL_9733BF17E	-0.133226	0.0808816	0.297525	1.33593	AUX	CPT1	Coleoptile phototropism protein 1	EMS64627.1	0	Triticum urartu	Signal transduction
Traes_2AS_A56BC88C0	0.211493	-0.663716	-1.18293	-1.57983	AUX	SNRK2.4	SNF1-type serine-threonine protein kinase	AHC00227.1	0	Triticum polonicum	Signal transduction
Traes_2BS_9D77461D8	0.611498	-0.87252	-1.50661	-2.17431	AUX	SNRK2.4	SNF1-type serine-threonine protein kinase	AHC00227.1	0	Triticum polonicum	Signal transduction
Traes_2DS_34BEEC8AB	0.611196	-0.857254	-1.17551	-1.43151	AUX	SNRK2.4	SNF1-type serine-threonine protein kinase	AHC00227.1	0	Triticum polonicum	Signal transduction
Traes_3B_39C790430	0.38236	0.8653	2.23487	1.97755	AUX	SNRK2.4	SNF1-type serine-threonine protein kinase	ACU65228.1	0	Triticum aestivum	Signal transduction
Traes_3B_D59C1CA8B	-0.125564	-0.132224	0.203083	1.07394	BR	GRF3	14-3-3 protein	AGA84102.1	0	Triticum aestivum	Signal transduction
Traes_3DS_63471506E	-0.168178	0.320336	0.189972	1.53334	BR	GRF3	14-3-3 protein	AGA84102.1	2e-110	Triticum aestivum	Signal transduction
Traes_2AL_197BC062C	0.205904	0.432638	-0.497022	0.723666	BR	GRF3	14-3-3 protein GF14-B	EMS56849.1	0	Triticum urartu	Signal transduction
Traes_3B_212861038	-0.00899217	0.414574	1.58524	1.29716	BR	DWF5	7-dehydrocholesterol reductase	EMT02871.1	0	Aegilops tauschii	Hormone synthesis
Traes_3DL_06EC4AADA	0.311948	0.8438	1.57262	1.72233	BR	DWF5	7-dehydrocholesterol reductase	EMT02871.1	0	Aegilops tauschii	Hormone synthesis
Traes_2BL_1AED96909	0.2369	-0.867948	-0.974781	-1.08313	BR	ARF1	Auxin response factor 9-like	XP_006653437.1	0	Oryza brachyantha	Signal transduction
Traes_5DL_A711AB89A	-0.151269	-0.697202	-1.61162	-2.56665	BR	ASK41	Shaggy-related protein kinase delta	EMT16766.1	0	Aegilops tauschii	Signal transduction
Traes_1BL_56BBB4B2F	0.207219	0.98593	2.21243	1.88168	CTK	Actin 1	Actin-2	NP_001146931.1	1	Zea mays	Undefined
Traes_1DL_9926BBAE1	0.180446	0.724666	1.8123	1.10678	CTK	Actin 1	Actin-2	NP_001146931.1	1	Zea mays	Undefined
Traes_1AL_5D3EECC71	0.163872	1.02317	1.75614	1.39135	CTK	Actin 1	Actin-2	XP_003574188.1	1	Brachypodium distachyon	Undefined
Traes_5AL_8E706641D	-0.291799	0.231394	-1.35597	-1.38497	CTK	Actin 1	Actin-3	EMS60494.1	0	Triticum urartu	Undefined
Traes_5BL_4BD0ED173	-0.188741	0.139656	-0.606609	-1.50174	CTK	Actin 1	Actin-3	EMS60494.1	0	Triticum urartu	Undefined
Traes_5DL_95E144096	-0.131257	0.483391	-0.630493	-1.0685	CTK	Actin 1	Actin-3	EMS60494.1	0	Triticum urartu	Undefined
Traes_1AL_E195290EF	0.180333	1.03041	1.42126	2.01786	CTK	Actin 1	Actin-7	EMS62134.1	0	Triticum urartu	Undefined
Traes_1DL_727F09EF8	0.187368	0.832607	1.31188	1.6905	CTK	Actin 1	Actin-7	EMS62134.1	0	Triticum urartu	Undefined
Traes_1BL_D0A3F2067	-0.00566215	1.02012	1.65044	2.19286	CTK	Actin 1	Actin-7	EMS62134.1	1	Triticum urartu	Undefined
Traes_3B_319690489	0.278546	0.530811	1.72106	2.07073	CTK	Actin 1	Actin-7	EMT10897.1	0	Aegilops tauschii	Undefined
Traes_3AL_0D64FFEF1	0.280185	0.371147	1.30011	1.64673	CTK	Actin 1	Actin-7	EMT10897.1	3e-122	Aegilops tauschii	Undefined
Traes_3AL_A91F0938A	-0.0731746	0.310172	1.21402	1.57222	CTK	AHK3	Histidine kinase J	EMT25502.1	0	Aegilops tauschii	Receptor
Traes_3B_91AC06652	0.0257879	0.689423	1.04082	1.62023	CTK	AHK3	Histidine kinase J	EMT25502.1	0	Aegilops tauschii	Receptor
Traes_3DL_DB4F4CB29	-0.0902734	0.811281	1.47686	2.05224	CTK	AHK3	Histidine kinase J	EMT25502.1	0	Aegilops tauschii	Receptor
Traes_7DS_22DE624A5	-0.187544	0.983757	2.02018	2.31079	CTK	ARR12	Two-component response regulator ARR12-like	XP_006655852.1	0	Oryza brachyantha	Signal transduction
Traes_7AS_1318B59D3	-0.254155	1.26959	2.26484	2.08354	CTK	ARR2	Two-component response regulator ARR2	EMT22828.1	1e-76	Aegilops tauschii	Signal transduction
Traes_3B_4434107C4	0.563512	-1.54371	-1.01044	-0.854838	ET	ABC transporter	PDR-type ABC transporter 2	BAD52527.1	0	Oryza sativa Japonica Group	Undefined
Traes_5DL_A7D264077	1.24589	-0.84388	0.642739	1.79272	ET	ABC transporter	PDR-type ABC transporter	ACL80650.1	0	Triticum aestivum	Undefined
Traes_7AL_7E1C0EDEE	0.58202	0.0931368	2.59624	4.20594	ET	ABC transporter	Pleiotropic drug resistance protein 4	EMS61936.1	0	Triticum urartu	Undefined
Traes_3DL_920C6D20E	0.500333	-1.82783	-1.16298	-1.09329	ET	ABC transporter	Pleiotropic drug resistance protein 4	EMT06883.1	0	Aegilops tauschii	Undefined
Traes_7DL_CCE27DF79	0.744028	-2.58119	0.720409	2.33013	ET	ABC transporter	Pleiotropic drug resistance protein 4	EMT20966.1	0	Aegilops tauschii	Undefined
Traes_5BL_AAE5B3832	1.48884	0.793088	2.35366	3.5614	ET	ABC transporter	Pleiotropic drug resistance protein 5	EMS54450.1	0	Triticum urartu	Undefined
Traes_6AS_CF6D8CD28	0.118106	-0.904441	-0.820832	-0.169665	ET	CSLD5	Cellulose synthase A catalytic subunit 1	EMT03676.1	0	Aegilops tauschii	Signal transduction
Traes_2AS_665AF9500	0.0727811	0.316424	0.440255	1.27028	ET	CSLD5	Cellulose synthase A catalytic subunit 8 (UDP-forming)	EMT09789.1	0	Aegilops tauschii	Signal transduction
Traes_2BS_064B02A89	-0.274414	0.180864	0.346425	1.29088	ET	CSLD5	Cellulose synthase A catalytic subunit 8 (UDP-forming)	EMT09789.1	0	Aegilops tauschii	Signal transduction
Traes_2DS_C80293002	-0.219094	0.401043	0.352213	1.1381	ET	CSLD5	Cellulose synthase A catalytic subunit 8 (UDP-forming)	EMT09789.1	0	Aegilops tauschii	Signal transduction
Traes_4AS_2BDA1260C	-0.0984152	-0.702235	-0.178811	0.448327	ET	EIN3	Ethylene-insensitive3-like 1 protein	ABF95697.1	0	Oryza sativa Japonica Group	Signal transduction
Traes_4BL_F34EBD618	0.194199	-0.483033	0.27191	0.608644	ET	EIN3	Ethylene-insensitive3-like protein	BAB78462.2	0	Oryza sativa Japonica Group	Signal transduction
Traes_3B_95F335BEE	-0.216916	1.62665	3.38117	5.83913	ET	GH3	Indole-3-acetic acid-amido synthetase GH3.2	XP_003569888.1	0	Brachypodium distachyon	Signal transduction
Traes_3B_C0FA00AC4	-0.316714	-0.803623	-2.33677	-2.49454	ET	LAX3	Auxin transporter-like protein 1-like	XP_006645042.1	0	Oryza brachyantha	Undefined
Traes_1AL_762E8A7A2	0.0593603	0.565529	0.843467	1.22955	ET	RAB8A	Ras-related protein RABE1c	XP_003568292.1	1e-100	Brachypodium distachyon	Signal transduction
Traes_1DL_97C6E468E	-0.0756002	0.617135	0.997152	1.25327	ET	RAB8A	Ras-related protein RABE1c	XP_003568292.1	2e-104	Brachypodium distachyon	Signal transduction
Traes_1AL_7EAFBE83A	0.389236	-1.85978	1.88408	-0.632506	ET	RBOHB	Respiratory burst oxidase-F-like protein	EMT31127.1	1	Aegilops tauschii	Signal transduction
Traes_6AL_643CE8D7C	0.184058	1.32023	1.7232	1.46347	ET	SAM-2	S-adenosylmethionine synthase 1	EMS47328.1	0	Triticum urartu	Hormone synthesis
Traes_6DL_F980A7D9A	0.506174	1.23233	1.77266	1.14345	ET	SAM-2	S-adenosylmethionine synthase 1	EMS47328.1	0	Triticum urartu	Hormone synthesis
Traes_3B_39C790430	0.38236	0.8653	2.23487	1.97755	ET	SNRK2.4	SNF1-type serine-threonine protein kinase	ACU65228.1	0	Triticum aestivum	Signal transduction
Traes_2BS_D7ED8BF9A	0.0662454	-0.0590951	-0.656661	-2.51986	JA	FAD7	Plastid omega-3 fatty acid desaturase	BAA07785.3	0	Triticum aestivum	Hormone synthesis
Traes_2DS_AE6E354A9	-0.107975	0.347296	-2.81225	-4.95583	JA	FAD7	Plastid omega-3 fatty acid desaturase	BAA07785.3	0	Triticum aestivum	Hormone synthesis
Traes_4DL_B75BA7E6C	0.633565	-2.20237	-1.87545	-0.674676	JA	FAD7	Omega-3 fatty acid desaturase, chloroplastic-like	XP_003558157.1	0	Brachypodium distachyon	Hormone synthesis
Traes_2AS_0607B91CB	-0.253915	0.154143	-2.60884	-5.44417	JA	FAD7	Plastid omega-3 fatty acid desaturase	BAA07785.3	0	Triticum aestivum	Hormone synthesis
Traes_2AL_5820BAF68	0.679666	-0.995891	0.348356	1.40849	JA	OPR1	12-oxophytodienoate reductase 1	EMS65404.1	0	Triticum urartu	Hormone synthesis
Traes_6BL_54182EEB2	0.233028	0.59691	2.15543	2.77451	JA	KAT2	3-ketoacyl-CoA thiolase-like protein	BAI66423.1	0	Triticum aestivum	Hormone synthesis
Traes_6DL_7960654CF	0.213583	0.482328	1.83575	2.63234	JA	KAT2	3-ketoacyl-CoA thiolase-like protein	BAI66423.1	0	Triticum aestivum	Hormone synthesis
Traes_1BS_85C7EF9D4	-0.006411	-0.457336	-1.36214	-2.03811	JA	PLDALPHA2	Phospholipase D alpha 1	EMT24153.1	1	Aegilops tauschii	Hormone synthesis
Traes_3B_D8B3F965A	-0.31013	-0.336744	0.798468	0.407677	JA	COI2	Coronatine insensitive 2-like protein	ADK66974.1	0	Triticum aestivum	Signal transduction
Traes_2DS_C0C75D1D7	0.212598	-0.71129	0.668183	1.88786	JA	TIFY 10A	TIFY 10B-like isoform X2	XP_010235620.1	1e-110	Brachypodium distachyon	Signal transduction
Traes_4DL_E25D3DF01	-1.81391	-4.09049	-2.12694	0.17348	JA	TIFY 10A	TIFY 10A-like	XP_003558665.1	6e-31	Brachypodium distachyon	Signal transduction
Traes_2AS_A8CCC32D3	0.144403	-1.03628	0.299041	1.88478	JA	TIFY 10A	TIFY 10A-like	XP_003572804.1	1e-108	Brachypodium distachyon	Signal transduction
Traes_2BS_2C79AE2DE	0.0542968	-0.77084	0.565229	1.87147	JA	TIFY 10A	TIFY 10B-like isoform X2	XP_010235620.1	1e-107	Brachypodium distachyon	Signal transduction
Traes_5DL_4186C5347	0.137738	-3.36662	-1.07878	0.761017	JA	TIFY 10A	TIFY 10A	XP_003578176.2	5e-69	Brachypodium distachyon	Signal transduction
Traes_5AL_BB55F989A	0.00194661	-3.28959	-1.01603	1.40933	JA	TIFY 10A	TIFY 10A	XP_003578176.2	2e-60	Brachypodium distachyon	Signal transduction
Traes_3B_4434107C4	0.563512	-1.54371	-1.01044	-0.854838	JA	ABC transporter	PDR-type ABC transporter 2	BAD52527.1	0	Oryza sativa Japonica Group	Undefined
Traes_3DL_920C6D20E	0.500333	-1.82783	-1.16298	-1.09329	JA	ABC transporter	Pleiotropic drug resistance protein 4	EMT06883.1	0	Aegilops tauschii	Undefined
Traes_5BL_AAE5B3832	1.48884	0.793088	2.35366	3.5614	JA	ABC transporter	Pleiotropic drug resistance protein 5	EMS54450.1	0	Triticum urartu	Undefined
Traes_5DL_A7D264077	1.24589	-0.84388	0.642739	1.79272	JA	ABC transporter	PDR-type ABC transporter	ACL80650.1	0	Triticum aestivum	Undefined
Traes_7AL_7BD10B6C7	0.457881	0.464538	1.705	2.30184	JA	ABC transporter	Pleiotropic drug resistance protein 12	XP_003563764.2	0	Brachypodium distachyon	Undefined
Traes_7AL_7E1C0EDEE	0.58202	0.0931368	2.59624	4.20594	JA	ABC transporter	Pleiotropic drug resistance protein 4	EMS61936.1	0	Triticum urartu	Undefined
Traes_7DL_CCE27DF79	0.744028	-2.58119	0.720409	2.33013	JA	ABC transporter	Pleiotropic drug resistance protein 4	EMT20966.1	0	Aegilops tauschii	Undefined
Traes_2DS_C80293002	-0.219094	0.401043	0.352213	1.1381	JA	CSLD5	Cellulose synthase A catalytic subunit 8 (UDP-forming)	EMT09789.1	0	Aegilops tauschii	Signal transduction
Traes_6AS_CF6D8CD28	0.118106	-0.904441	-0.820832	-0.169665	JA	CSLD5	Cellulose synthase A catalytic subunit 1	EMT03676.1	0	Aegilops tauschii	Signal transduction
Traes_2AS_665AF9500	0.0727811	0.316424	0.440255	1.27028	JA	CSLD5	Cellulose synthase A catalytic subunit 8 (UDP-forming)	EMT09789.1	0	Aegilops tauschii	Signal transduction
Traes_2BS_064B02A89	-0.274414	0.180864	0.346425	1.29088	JA	CSLD5	Cellulose synthase A catalytic subunit 8 (UDP-forming)	EMT09789.1	0	Aegilops tauschii	Signal transduction
Traes_3B_082C9D5C8	0.75728	1.43842	0.80023	-0.34196	JA	CYT1	Mannose-1-phosphate guanyltransferase beta	EMT31032.1	0	Aegilops tauschii	Signal transduction
Traes_3DL_3FDB734ED	0.535056	0.510968	1.97119	0.144391	JA	CYT1	Mannose-1-phosphate guanyltransferase beta	EMT31032.1	0	Aegilops tauschii	Signal transduction
Traes_1BS_D3FD8CC9D	0.114277	0.0937725	0.419121	1.53688	JA	GSH1	Glutamate--cysteine ligase B, chloroplastic	XP_003569058.1	0	Brachypodium distachyon	Signal transduction
Traes_1DS_EFDF9CB72	0.140813	-0.108939	0.695107	1.52587	JA	GSH1	Glutamate--cysteine ligase B, chloroplastic	XP_003569058.1	0	Brachypodium distachyon	Signal transduction
Traes_4AL_9D0E18A90	0.485417	3.04258	2.12511	2.01959	JA	VTC5	GDP-L-galactose phosphorylase 2-like	XP_003577725.1	0	Brachypodium distachyon	Signal transduction
Traes_4BS_F7359FA2E	0.364423	2.90914	1.86424	1.93663	JA	VTC5	GDP-L-galactose phosphorylase 2-like	XP_003577725.1	0	Brachypodium distachyon	Signal transduction
Traes_4DS_94005294B	0.10856	2.36741	1.63087	1.62343	JA	VTC5	GDP-L-galactose phosphorylase 2-like	XP_003577725.1	0	Brachypodium distachyon	Signal transduction
Traes_5BL_AAE5B3832	1.48884	0.793088	2.35366	3.5614	SA	ABC transporter	Pleiotropic drug resistance protein 5	EMS54450.1	0	Triticum urartu	Undefined
Traes_5DL_A7D264077	1.24589	-0.84388	0.642739	1.79272	SA	ABC transporter	PDR-type ABC transporter	ACL80650.1	0	Triticum aestivum	Undefined
Traes_7AL_7E1C0EDEE	0.58202	0.0931368	2.59624	4.20594	SA	ABC transporter	Pleiotropic drug resistance protein 4	EMS61936.1	0	Triticum urartu	Undefined
Traes_7DL_CCE27DF79	0.744028	-2.58119	0.720409	2.33013	SA	ABC transporter	Pleiotropic drug resistance protein 4	EMT20966.1	0	Aegilops tauschii	Undefined
Traes_3B_4434107C4	0.563512	-1.54371	-1.01044	-0.854838	SA	ABC transporter	PDR-type ABC transporter 2	BAD52527.1	0	Oryza sativa Japonica Group	Undefined
Traes_3DL_920C6D20E	0.500333	-1.82783	-1.16298	-1.09329	SA	ABC transporter	Pleiotropic drug resistance protein 4	EMT06883.1	0	Aegilops tauschii	Undefined
Traes_5AL_9733BF17E	-0.133226	0.0808816	0.297525	1.33593	SA	CPT1	Coleoptile phototropism protein 1	EMS64627.1	0	Triticum urartu	Signal transduction
Traes_2BL_5DFE6B3311	0.896229	-0.134273	-1.10002	-1.72976	SA	GSL12	Callose synthase 12-like	XP_003566983.1	0	Brachypodium distachyon	Signal transduction
Traes_2AL_5820BAF68	0.679666	-0.995891	0.348356	1.40849	SA	OPR1	12-oxophytodienoate reductase 1	EMS65404.1	1	Triticum urartu	Signal transduction
Novel02015	0.125246	0.434977	0.479219	1.45566	SA	UBQ3	Polyubiquitin containing 7 ubiquitin monomers	ABR25718.1	2e-70	Oryza sativa Indica Group	Signal transduction
Traes_5DL_BABD13074	2.12275	-1.08008	2.08054	2.16147	SA	PR1-19	Pathogenesis-related protein 1-16	AHE81259.1	7e-92	Triticum aestivum	Signal transduction
Traes_5DL_F71758B66	1.59022	-0.863885	1.84095	2.55539	SA	PR1-9	Pathogenesis-related protein PRMS	EMT11012.1	4e-98	Aegilops tauschii	Signal transduction
Traes_4BL_DAFEC95DD	0.160528	-0.047485	0.937664	1.65158	SA	TGA	TGA2-like isoform X1	XP_003558037.1	0	Brachypodium distachyon	Signal transduction
Traes_4DL_73DC40D7B	0.164273	0.165251	1.19941	1.91235	SA	TGA	TGA2-like isoform X1	XP_003558037.1	0	Brachypodium distachyon	Signal transduction
Traes_4AS_6EDD5ACF7	0.137688	0.0975084	1.09544	1.84714	SA	TGA	TGA2-like isoform X1	XP_003558037.1	0	Brachypodium distachyon	Signal transduction
Traes_2AL_BD0C7A9A5	-0.418937	0.732727	1.46131	1.97878	SA	TGA4	TGA4	EMS46353.1	0	Triticum urartu	Signal transduction
Traes_2BL_9528AAD7C	-0.156163	0.286137	1.55426	1.87657	SA	TGA4	TGA4	AJC64139.1	0	Triticum aestivum	Signal transduction
