# Supplementary material for: Transcriptome Analysis of Early Senescence in the Post-Anthesis Flag Leaf of Wheat (Triticum aestivum L.)
Source: Plants (Basel). 2022 Oct 1;11(19):2593. doi: 10.3390/plants11192593 (PMC9572001; doi:10.3390/plants11192593)
Supplement: Supplementary file 1 [file plants-11-02593-s001.zip › Table S7. Chlorophyll-related SAGs.xls]

## Sheet: 123.Quantification
Gene_id	Annotation	Log2(Ratio)				Homologue	E value
		0DAA	15DAA	25DAA	30DAA
Chlorophyll breakdown
Traes_3AS_2572C1790	Chlorophyll(ide) b reductase	-0.131061	0.436711	1.62579	2.14106	EMS48016.1	0
Traes_3B_A0C73B654	Chlorophyll(ide) b reductase	-0.255411	0.141151	1.01676	1.74876	EMS48016.1	0
Traes_3DS_487C7C08D	Chlorophyll(ide) b reductase	-0.054236	0.311583	1.12152	2.05684	EMS48016.1	0
Traes_4DS_20DB106A4	Chlorophyll(ide) b reductase	0.103373	0.33451	2.34838	3.74998	XP_010231930.1	3e-111
Traes_6BL_3C04C3D2F	Chlorophyll(ide) b reductase	0.376167	0.759346	2.70964	3.90578	Q84ST4.1	0
Traes_4AL_2FB8419FC	Pheophorbide a oxygenase	0.111651	1.15113	2.68374	3.56399	EMT23077.1	0
Traes_4BL_4447E55C5	Pheophorbide a oxygenase	0.233667	1.27082	2.78949	3.2033	EMT23077.1	5e-108
Traes_4BL_DDFF53A11	Pheophorbide a oxygenase	0.207715	1.07768	2.46846	2.51451	EMT23077.1	2e-57
Traes_4DL_C36F5A266	Pheophorbide a oxygenase	0.442501	1.0107	2.52742	3.04604	EMT23077.1	0
Chlorophyll synthesis
Traes_3AL_FF45EE896	Chlorophyllide a oxygenase	-0.339511	-0.560606	-0.584635	-1.90126	AFI73228.1	0
Traes_3B_4B480BFB0	Chlorophyllide a oxygenase	-0.279026	-0.601669	-0.849869	-2.34853	AFI73228.1	0
Traes_3DL_0A3CB06F8	Chlorophyllide a oxygenase	-0.185358	-0.469227	-0.32259	-2.07012	AFI73228.1	0
Traes_2AL_DF262E611	Coproporphyrinogen III oxidase	0.182742	-0.411058	-1.48406	-1.58185	XP_006652801.1	0
Traes_2BL_1B7BF234B	Coproporphyrinogen III oxidase	0.198708	-0.478403	-1.7375	-2.00333	XP_003580521.1	2e-84
Traes_2BL_D33683EE9	Coproporphyrinogen III oxidase	0.0577273	-0.613179	-1.98959	-2.09388	EMS67249.1	4e-135
Traes_2DL_30F23E577	Coproporphyrinogen III oxidase	0.0874322	-0.554151	-1.97869	-2.47429	XP_003580521.1	0
Traes_6DL_0FF72D765	Geranylgeranyl reductase	-0.125649	0.194216	-1.03531	-3.07029	XP_003570660.1	0
Traes_2AS_B6BA92570	Magnesium chelatase subunit H	-0.320261	-0.233753	-2.8143	-4.14811	AAK72401.1	0
Traes_2AS_BFBD75AB4	Magnesium chelatase subunit H	-0.44793	-0.273682	-2.36624	-4.30012	AAK72401.1	1e-142
Traes_2BS_E67494A11	Magnesium chelatase subunit H	-0.234147	-0.13446	-1.4331	-3.3949	AAK72401.1	0
Traes_7AL_8481A6FD7	Magnesium chelatase subunit H	0.191091	-0.597269	-1.3413	-1.96224	EMT16090.1	4e-81
Traes_7BL_12EBCA739	Magnesium chelatase subunit H	0.188639	-0.296253	-1.19231	-2.01352	EMT16090.1	3e-106
Traes_7BL_82850CC15	Magnesium chelatase subunit H	0.180219	-0.420195	-1.38309	-2.19932	EMT16090.1	2e-74
Traes_7DL_1A46C6743	Magnesium chelatase subunit H	0.195714	-0.445976	-1.35249	-2.17185	EMS53132.1	0
Traes_3AS_7D0D8B4BA	Magnesium-protoporphyrin IX monomethyl ester (oxidative) cyclase	-0.206415	-0.370408	-1.82713	-2.48388	EMT08710.1	1e-57
Traes_3B_2F5D73D6F	Magnesium-protoporphyrin IX monomethyl ester (oxidative) cyclase	-0.158438	-0.357171	-1.68911	-2.49399	EMT08710.1	0
Traes_3DS_F49F1818D	Magnesium-protoporphyrin IX monomethyl ester (oxidative) cyclase	-0.204664	-0.303685	-2.15431	-2.82285	EMT08710.1	1e-35
Traes_4AL_2D1E33772	Magnesium-protoporphyrin O-methyltransferase	-0.107301	-0.538061	-1.41594	-2.49031	XP_003561138.1	6e-99
Traes_5BS_5C3BA5328	Oxygen-dependent protoporphyrinogen oxidase	0.203395	-0.757405	-1.49535	-1.71665	EMT07463.1	0
Traes_1AL_BB3D071F8	Protochlorophyllide reductase	-0.189569	-0.203411	-1.27686	-2.40263	Q42850.1	0
Traes_1BL_78D0F4408	Protochlorophyllide reductase	-0.1778	-0.401706	-1.38789	-2.68093	Q42850.1	4e-102
Traes_1BL_BB286FB67	Protochlorophyllide reductase	-0.321415	-0.375723	-1.5157	-2.73491	Q42850.1	4e-44
Traes_1DL_D47E11A56	Protochlorophyllide reductase	-0.221474	-0.390752	-1.4273	-2.48703	EMT17316.1	2e-66
